# Supplementary material for: The nutrient-sensing GCN2 signaling pathway is essential for circadian clock function by regulating histone acetylation under amino acid starvation
Source: eLife journal article supplement (doi:10.7554/elife.85241), 2023-04-21
Supplement: fig1-data1 [file Figure 1-source data 1.xlsx]

## Sheet: WT+3mM 3-AT
LumiCycle: (Baseline subtracted)
Time (hr:min)	Time (days)	counts/sec
12:31:00	0.52153	3.014
12:41:00	0.52847	18.857
12:51:00	0.53542	24.506
13:01:00	0.54236	45.858
13:11:00	0.54931	64.64
13:21:00	0.55625	65.568
13:31:00	0.56319	79.22
13:41:00	0.57014	67.272
13:51:00	0.57708	81.666
14:01:00	0.58403	68.59
14:11:00	0.59097	76.447
14:21:00	0.59792	73.746
14:31:00	0.60486	83.978
14:41:00	0.61181	79.928
14:51:00	0.61875	68.479
15:01:00	0.62569	76.492
15:11:00	0.63264	76.581
15:21:00	0.63958	65.284
15:31:00	0.64653	66.581
15:41:00	0.65347	58.118
15:51:00	0.66042	49.934
16:01:00	0.66736	53.941
16:11:00	0.67431	49.599
16:21:00	0.68125	49.851
16:31:00	0.68819	44.808
16:41:00	0.69514	42.3
16:51:00	0.70208	38.942
17:01:00	0.70903	28.834
17:11:00	0.71597	30.329
17:21:00	0.72292	23.607
17:31:00	0.72986	24.02
17:41:00	0.73681	19.456
17:51:00	0.74375	18.534
18:01:00	0.75069	11.868
18:11:00	0.75764	13.039
18:21:00	0.76458	7.86
18:31:00	0.77153	9.193
18:41:00	0.77847	4.919
18:51:00	0.78542	4.473
19:01:00	0.79236	3.235
19:11:00	0.79931	-0.53
19:21:00	0.80625	-2.438
19:31:00	0.81319	-3.952
19:41:00	0.82014	-7.674
19:51:00	0.82708	-8.108
20:01:00	0.83403	-5.778
20:11:00	0.84097	-7.898
20:21:00	0.84792	-8.914
20:31:00	0.85486	-13.445
20:41:00	0.86181	-14.936
20:51:00	0.86875	-15.793
21:01:00	0.87569	-17.383
21:11:00	0.88264	-16.555
21:21:00	0.88958	-20.431
21:31:00	0.89653	-21.757
21:41:00	0.90347	-24.23
21:51:00	0.91042	-20.433
22:01:00	0.91736	-26.033
22:11:00	0.92431	-25.72
22:21:00	0.93125	-26.762
22:31:00	0.93819	-29.738
22:41:00	0.94514	-27.325
22:51:00	0.95208	-28.839
23:01:00	0.95903	-32.136
23:11:00	0.96597	-34.485
23:21:00	0.97292	-32.596
23:31:00	0.97986	-33.031
23:41:00	0.98681	-38.611
23:51:00	0.99375	-36.368
00:01:00	1.00069	-38.392
00:11:00	1.00764	-38.751
00:21:00	1.01458	-40.525
00:31:00	1.02153	-42.368
00:41:00	1.02847	-40.471
00:51:00	1.03542	-42.243
01:01:00	1.04236	-43.84
01:11:00	1.04931	-44.494
01:21:00	1.05625	-48.099
01:31:00	1.06319	-46.098
01:41:00	1.07014	-48.477
01:51:00	1.07708	-47.608
02:01:00	1.08403	-45.198
02:11:00	1.09097	-46.911
02:21:00	1.09792	-49.778
02:31:00	1.10486	-47.916
02:41:00	1.11181	-49.352
02:51:00	1.11875	-50.453
03:01:00	1.12569	-52.524
03:11:00	1.13264	-49.816
03:21:00	1.13958	-52.994
03:31:00	1.14653	-52.425
03:41:00	1.15347	-52.496
03:51:00	1.16042	-52.212
04:01:00	1.16736	-51.479
04:11:00	1.17431	-51.517
04:21:00	1.18125	-51.391
04:31:00	1.18819	-50.403
04:41:00	1.19514	-49.386
04:51:00	1.20208	-51.233
05:01:00	1.20903	-48.169
05:11:00	1.21597	-49.896
05:21:00	1.22292	-49.835
05:31:00	1.22986	-50.264
05:41:00	1.23681	-49.997
05:51:00	1.24375	-48.392
06:01:00	1.25069	-48.328
06:11:00	1.25764	-45.436
06:21:00	1.26458	-43.359
06:31:00	1.27153	-46.475
06:41:00	1.27847	-42.595
06:51:00	1.28542	-41.481
07:01:00	1.29236	-40.338
07:11:00	1.29931	-42.089
07:21:00	1.30625	-36.028
07:31:00	1.31319	-35.669
07:41:00	1.32014	-35.968
07:51:00	1.32708	-31.612
08:01:00	1.33403	-33.648
08:11:00	1.34097	-26.646
08:21:00	1.34792	-26.332
08:31:00	1.35486	-23.05
08:41:00	1.36181	-21.036
08:51:00	1.36875	-18.123
09:01:00	1.37569	-13.128
09:11:00	1.38264	-6.93
09:21:00	1.38958	-4.64
09:31:00	1.39653	-5.116
09:41:00	1.40347	-0.02
09:51:00	1.41042	3.415
10:01:00	1.41736	8.159
10:11:00	1.42431	8.878
10:21:00	1.43125	10.431
10:31:00	1.43819	14.231
10:41:00	1.44514	21.325
10:51:00	1.45208	26.913
11:01:00	1.45903	29.225
11:11:00	1.46597	29.196
11:21:00	1.47292	36.218
11:31:00	1.47986	34.986
11:41:00	1.48681	37.747
11:51:00	1.49375	43.403
12:01:00	1.50069	42.698
12:11:00	1.50764	47.688
12:21:00	1.51458	52.488
12:31:00	1.52153	57.552
12:41:00	1.52847	54.544
12:51:00	1.53542	55.59
13:01:00	1.54236	60.766
13:11:00	1.54931	66.751
13:21:00	1.55625	63.524
13:31:00	1.56319	67.823
13:41:00	1.57014	69.175
13:51:00	1.57708	69.195
14:01:00	1.58403	68.008
14:11:00	1.59097	63.05
14:21:00	1.59792	69.146
14:31:00	1.60486	62.395
14:41:00	1.61181	66.034
14:51:00	1.61875	64.634
15:01:00	1.62569	58.685
15:11:00	1.63264	66.503
15:21:00	1.63958	62.921
15:31:00	1.64653	59.132
15:41:00	1.65347	57.08
15:51:00	1.66042	54.06
16:01:00	1.66736	51.487
16:11:00	1.67431	53.99
16:21:00	1.68125	48.88
16:31:00	1.68819	42.578
16:41:00	1.69514	38.086
16:51:00	1.70208	37.454
17:01:00	1.70903	35.926
17:11:00	1.71597	32.531
17:21:00	1.72292	33.657
17:31:00	1.72986	30.955
17:41:00	1.73681	26.642
17:51:00	1.74375	26.145
18:01:00	1.75069	18.13
18:11:00	1.75764	18.583
18:21:00	1.76458	14.366
18:31:00	1.77153	12.697
18:41:00	1.77847	10.248
18:51:00	1.78542	9.778
19:01:00	1.79236	9.798
19:11:00	1.79931	8.244
19:21:00	1.80625	5.646
19:31:00	1.81319	-0.065
19:41:00	1.82014	-1.059
19:51:00	1.82708	-5.771
20:01:00	1.83403	-5.682
20:11:00	1.84097	-2.645
20:21:00	1.84792	-12.151
20:31:00	1.85486	-11.754
20:41:00	1.86181	-15.332
20:51:00	1.86875	-15.199
21:01:00	1.87569	-16.717
21:11:00	1.88264	-19.474
21:21:00	1.88958	-20.077
21:31:00	1.89653	-24.328
21:41:00	1.90347	-25.031
21:51:00	1.91042	-26.534
22:01:00	1.91736	-28.269
22:11:00	1.92431	-30.413
22:21:00	1.93125	-35.49
22:31:00	1.93819	-32.825
22:41:00	1.94514	-33.999
22:51:00	1.95208	-33.726
23:01:00	1.95903	-37.321
23:11:00	1.96597	-38.796
23:21:00	1.97292	-42.084
23:31:00	1.97986	-47.312
23:41:00	1.98681	-45.1
23:51:00	1.99375	-51.138
00:01:00	2.00069	-52.703
00:11:00	2.00764	-49.227
00:21:00	2.01458	-49.873
00:31:00	2.02153	-52.584
00:41:00	2.02847	-53.341
00:51:00	2.03542	-57.579
01:01:00	2.04236	-63.238
01:11:00	2.04931	-59.918
01:21:00	2.05625	-65.974
01:31:00	2.06319	-61.282
01:41:00	2.07014	-64.889
01:51:00	2.07708	-65.493
02:01:00	2.08403	-66.817
02:11:00	2.09097	-68.855
02:21:00	2.09792	-68.57
02:31:00	2.10486	-74.528
02:41:00	2.11181	-70.748
02:51:00	2.11875	-73.527
03:01:00	2.12569	-72.551
03:11:00	2.13264	-75.061
03:21:00	2.13958	-78.337
03:31:00	2.14653	-79.122
03:41:00	2.15347	-81.517
03:51:00	2.16042	-79.221
04:01:00	2.16736	-79.873
04:11:00	2.17431	-81.838
04:21:00	2.18125	-81.328
04:31:00	2.18819	-83.345
04:41:00	2.19514	-86.338
04:51:00	2.20208	-82.244
05:01:00	2.20903	-87.302
05:11:00	2.21597	-80.722
05:21:00	2.22292	-82.863
05:31:00	2.22986	-83.612
05:41:00	2.23681	-77.996
05:51:00	2.24375	-79.977
06:01:00	2.25069	-82.728
06:11:00	2.25764	-77.626
06:21:00	2.26458	-78.195
06:31:00	2.27153	-74.752
06:41:00	2.27847	-72.437
06:51:00	2.28542	-70.325
07:01:00	2.29236	-73.288
07:11:00	2.29931	-64.027
07:21:00	2.30625	-61.711
07:31:00	2.31319	-60.934
07:41:00	2.32014	-55.28
07:51:00	2.32708	-51.544
08:01:00	2.33403	-46.656
08:11:00	2.34097	-43.063
08:21:00	2.34792	-36.962
08:31:00	2.35486	-33.375
08:41:00	2.36181	-28.498
08:51:00	2.36875	-20.488
09:01:00	2.37569	-17.497
09:11:00	2.38264	-7.785
09:21:00	2.38958	-7.599
09:31:00	2.39653	5.102
09:41:00	2.40347	4.622
09:51:00	2.41042	12.526
10:01:00	2.41736	12.037
10:11:00	2.42431	20.261
10:21:00	2.43125	27.575
10:31:00	2.43819	38.311
10:41:00	2.44514	40.191
10:51:00	2.45208	42.462
11:01:00	2.45903	53.843
11:11:00	2.46597	58.287
11:21:00	2.47292	62.845
11:31:00	2.47986	77.945
11:41:00	2.48681	74.208
11:51:00	2.49375	80.518
12:01:00	2.50069	85.942
12:11:00	2.50764	92.495
12:21:00	2.51458	97.807
12:31:00	2.52153	103.359
12:41:00	2.52847	111.948
12:51:00	2.53542	106.927
13:01:00	2.54236	114.139
13:11:00	2.54931	119.477
13:21:00	2.55625	118.811
13:31:00	2.56319	123.167
13:41:00	2.57014	126.18
13:51:00	2.57708	123.157
14:01:00	2.58403	127.301
14:11:00	2.59097	129.466
14:21:00	2.59792	124.008
14:31:00	2.60486	122.501
14:41:00	2.61181	126.815
14:51:00	2.61875	121.928
15:01:00	2.62569	120.595
15:11:00	2.63264	120.392
15:21:00	2.63958	117.492
15:31:00	2.64653	109.684
15:41:00	2.65347	105.216
15:51:00	2.66042	104.98
16:01:00	2.66736	109.705
16:11:00	2.67431	103.706
16:21:00	2.68125	99.058
16:31:00	2.68819	92.507
16:41:00	2.69514	79.909
16:51:00	2.70208	79.418
17:01:00	2.70903	77.034
17:11:00	2.71597	70.733
17:21:00	2.72292	67.885
17:31:00	2.72986	61.112
17:41:00	2.73681	57.395
17:51:00	2.74375	50.345
18:01:00	2.75069	51.28
18:11:00	2.75764	44.547
18:21:00	2.76458	41.605
18:31:00	2.77153	36.507
18:41:00	2.77847	24.042
18:51:00	2.78542	30.407
19:01:00	2.79236	23.155
19:11:00	2.79931	16.515
19:21:00	2.80625	11.382
19:31:00	2.81319	5.876
19:41:00	2.82014	4.085
19:51:00	2.82708	6.307
20:01:00	2.83403	2.284
20:11:00	2.84097	-5.933
20:21:00	2.84792	-2.056
20:31:00	2.85486	-7.118
20:41:00	2.86181	-10.085
20:51:00	2.86875	-15.194
21:01:00	2.87569	-18.296
21:11:00	2.88264	-19.457
21:21:00	2.88958	-26.254
21:31:00	2.89653	-25.208
21:41:00	2.90347	-33.995
21:51:00	2.91042	-35.305
22:01:00	2.91736	-35.747
22:11:00	2.92431	-44.965
22:21:00	2.93125	-46.69
22:31:00	2.93819	-45.022
22:41:00	2.94514	-49.43
22:51:00	2.95208	-55.359
23:01:00	2.95903	-51.776
23:11:00	2.96597	-61.462
23:21:00	2.97292	-62.471
23:31:00	2.97986	-65.386
23:41:00	2.98681	-74.492
23:51:00	2.99375	-78.517
00:01:00	3.00069	-79.402
00:11:00	3.00764	-85.154
00:21:00	3.01458	-84.061
00:31:00	3.02153	-90.383
00:41:00	3.02847	-88.755
00:51:00	3.03542	-93.7
01:01:00	3.04236	-93.111
01:11:00	3.04931	-104.488
01:21:00	3.05625	-107.967
01:31:00	3.06319	-101.409
01:41:00	3.07014	-106.793
01:51:00	3.07708	-96.398
02:01:00	3.08403	-116.803
02:11:00	3.09097	-121.779
02:21:00	3.09792	-126.022
02:31:00	3.10486	-126.375
02:41:00	3.11181	-129.965
02:51:00	3.11875	-130.006
03:01:00	3.12569	-130.753
03:11:00	3.13264	-135.097
03:21:00	3.13958	-139.791
03:31:00	3.14653	-134.545
03:41:00	3.15347	-139.697
03:51:00	3.16042	-140.446
04:01:00	3.16736	-147.555
04:11:00	3.17431	-145.339
04:21:00	3.18125	-141.535
04:31:00	3.18819	-153.494
04:41:00	3.19514	-149.107
04:51:00	3.20208	-151.963
05:01:00	3.20903	-151.688
05:11:00	3.21597	-147.166
05:21:00	3.22292	-128.56
05:31:00	3.22986	-161.61
05:41:00	3.23681	-150.261
05:51:00	3.24375	-156.608
06:01:00	3.25069	-149.55
06:11:00	3.25764	-132.887
06:21:00	3.26458	-136.702
06:31:00	3.27153	-140.238
06:41:00	3.27847	-137.592
06:51:00	3.28542	-144.278
07:01:00	3.29236	-131.143
07:11:00	3.29931	-115.864
07:21:00	3.30625	-127.371
07:31:00	3.31319	-114.438
07:41:00	3.32014	-111.983
07:51:00	3.32708	-105.893
08:01:00	3.33403	-96.343
08:11:00	3.34097	-94.436
08:21:00	3.34792	-70.54
08:31:00	3.35486	-82.342
08:41:00	3.36181	-73.305
08:51:00	3.36875	-64.192
09:01:00	3.37569	-58.008
09:11:00	3.38264	-21.721
09:21:00	3.38958	-48.667
09:31:00	3.39653	-31.673
09:41:00	3.40347	-19.816
09:51:00	3.41042	-12.14
10:01:00	3.41736	34.783
10:11:00	3.42431	3.71
10:21:00	3.43125	20.84
10:31:00	3.43819	35.411
10:41:00	3.44514	34.673
10:51:00	3.45208	79.403
11:01:00	3.45903	65.686
11:11:00	3.46597	62.142
11:21:00	3.47292	84.673
11:31:00	3.47986	91.925
11:41:00	3.48681	125.605
11:51:00	3.49375	107.555
12:01:00	3.50069	113.697
12:11:00	3.50764	121.701
12:21:00	3.51458	134.231
12:31:00	3.52153	141.953
12:41:00	3.52847	168.661
12:51:00	3.53542	159.462
13:01:00	3.54236	170.333
13:11:00	3.54931	168.982
13:21:00	3.55625	183.24
13:31:00	3.56319	189.799
13:41:00	3.57014	181.472
13:51:00	3.57708	191.044
14:01:00	3.58403	201.142
14:11:00	3.59097	198.475
14:21:00	3.59792	197.276
14:31:00	3.60486	210.543
14:41:00	3.61181	190.812
14:51:00	3.61875	203.076
15:01:00	3.62569	203.262
15:11:00	3.63264	189.183
15:21:00	3.63958	199.586
15:31:00	3.64653	192.399
15:41:00	3.65347	185.767
15:51:00	3.66042	192.962
16:01:00	3.66736	191.569
16:11:00	3.67431	180.814
16:21:00	3.68125	183.255
16:31:00	3.68819	170.752
16:41:00	3.69514	167.723
16:51:00	3.70208	171.33
17:01:00	3.70903	156.541
17:11:00	3.71597	146.353
17:21:00	3.72292	143.46
17:31:00	3.72986	142.981
17:41:00	3.73681	132.879
17:51:00	3.74375	132.252
18:01:00	3.75069	114.951
18:11:00	3.75764	109.265
18:21:00	3.76458	102.929
18:31:00	3.77153	93.403
18:41:00	3.77847	110.491
18:51:00	3.78542	92.07
19:01:00	3.79236	94.131
19:11:00	3.79931	77.054
19:21:00	3.80625	77.773
19:31:00	3.81319	78.063
19:41:00	3.82014	57.998
19:51:00	3.82708	60.142
20:01:00	3.83403	49.512
20:11:00	3.84097	50.378
20:21:00	3.84792	32.026
20:31:00	3.85486	28.343
20:41:00	3.86181	24.812
20:51:00	3.86875	20.175
21:01:00	3.87569	15.578
21:11:00	3.88264	9.034
21:21:00	3.88958	5.932
21:31:00	3.89653	-2.571
21:41:00	3.90347	-11.035
21:51:00	3.91042	-22.24
22:01:00	3.91736	-24.588
22:11:00	3.92431	-34.604
22:21:00	3.93125	-43.579
22:31:00	3.93819	-51.694
22:41:00	3.94514	-56.267
22:51:00	3.95208	-59.107
23:01:00	3.95903	-79.974
23:11:00	3.96597	-82.695
23:21:00	3.97292	-87.981
23:31:00	3.97986	-96.641
23:41:00	3.98681	-98.318
23:51:00	3.99375	-108.423
00:01:00	4.00069	-112.692
00:11:00	4.00764	-117.848
00:21:00	4.01458	-129.191
00:31:00	4.02153	-135.165
00:41:00	4.02847	-142.97
00:51:00	4.03542	-149.025
01:01:00	4.04236	-164.348
01:11:00	4.04931	-161.31
01:21:00	4.05625	-164.888
01:31:00	4.06319	-176.705
01:41:00	4.07014	-184.98
01:51:00	4.07708	-193.925
02:01:00	4.08403	-197.47
02:11:00	4.09097	-208.216
02:21:00	4.09792	-208.32
02:31:00	4.10486	-215.513
02:41:00	4.11181	-230.913
02:51:00	4.11875	-228.961
03:01:00	4.12569	-237.362
03:11:00	4.13264	-240.18
03:21:00	4.13958	-243.821
03:31:00	4.14653	-246.56
03:41:00	4.15347	-250.931
03:51:00	4.16042	-258.12
04:01:00	4.16736	-257.417
04:11:00	4.17431	-268.48
04:21:00	4.18125	-255.018
04:31:00	4.18819	-267.816
04:41:00	4.19514	-267.988
04:51:00	4.20208	-265.652
05:01:00	4.20903	-266.947
05:11:00	4.21597	-266.361
05:21:00	4.22292	-270.347
05:31:00	4.22986	-272.725
05:41:00	4.23681	-267.492
05:51:00	4.24375	-267.999
06:01:00	4.25069	-258.649
06:11:00	4.25764	-263.132
06:21:00	4.26458	-253.392
06:31:00	4.27153	-250.808
06:41:00	4.27847	-228.932
06:51:00	4.28542	-239.107
07:01:00	4.29236	-234.192
07:11:00	4.29931	-220.905
07:21:00	4.30625	-209.961
07:31:00	4.31319	-193.941
07:41:00	4.32014	-187.12
07:51:00	4.32708	-169.41
08:01:00	4.33403	-166.983
08:11:00	4.34097	-146.726
08:21:00	4.34792	-138.253
08:31:00	4.35486	-116.389
08:41:00	4.36181	-117.069
08:51:00	4.36875	-95.736
09:01:00	4.37569	-79.21
09:11:00	4.38264	-55.487
09:21:00	4.38958	-49.722
09:31:00	4.39653	-15.224
09:41:00	4.40347	-7.844
09:51:00	4.41042	4.528
10:01:00	4.41736	27.976
10:11:00	4.42431	48.3
10:21:00	4.43125	64.575
10:31:00	4.43819	91.498
10:41:00	4.44514	104.254
10:51:00	4.45208	118.154
11:01:00	4.45903	130.622
11:11:00	4.46597	154.787
11:21:00	4.47292	179.315
11:31:00	4.47986	190.196
11:41:00	4.48681	216.813
11:51:00	4.49375	221.184
12:01:00	4.50069	244.587
12:11:00	4.50764	265.528
12:21:00	4.51458	297.261
12:31:00	4.52153	290.263
12:41:00	4.52847	315.89
12:51:00	4.53542	326.832
13:01:00	4.54236	336.091
13:11:00	4.54931	353.618
13:21:00	4.55625	383.31
13:31:00	4.56319	388.748
13:41:00	4.57014	396.617
13:51:00	4.57708	390.661
14:01:00	4.58403	412.792
14:11:00	4.59097	427.627
14:21:00	4.59792	411.987
14:31:00	4.60486	412.227
14:41:00	4.61181	419.103
14:51:00	4.61875	423.87
15:01:00	4.62569	411.813
15:11:00	4.63264	426.225
15:21:00	4.63958	413.129
15:31:00	4.64653	425.201
15:41:00	4.65347	403.565
15:51:00	4.66042	412.5
16:01:00	4.66736	371.675
16:11:00	4.67431	387.787
16:21:00	4.68125	353.617
16:31:00	4.68819	362.317
16:41:00	4.69514	359.314
16:51:00	4.70208	356.541
17:01:00	4.70903	345.532
17:11:00	4.71597	329.808
17:21:00	4.72292	315.194
17:31:00	4.72986	307.823
17:41:00	4.73681	304.07
17:51:00	4.74375	277.345
18:01:00	4.75069	283.641
18:11:00	4.75764	250.626
18:21:00	4.76458	244.756
18:31:00	4.77153	222.11
18:41:00	4.77847	216.268
18:51:00	4.78542	193.642
19:01:00	4.79236	193.225
19:11:00	4.79931	165.093
19:21:00	4.80625	175.261
19:31:00	4.81319	136.919
19:41:00	4.82014	148.846
19:51:00	4.82708	111.753
20:01:00	4.83403	127.948
20:11:00	4.84097	97.01
20:21:00	4.84792	91.982
20:31:00	4.85486	61.146
20:41:00	4.86181	72.675
20:51:00	4.86875	40.541
21:01:00	4.87569	54.816
21:11:00	4.88264	27.124
21:21:00	4.88958	23.768
21:31:00	4.89653	-0.982
21:41:00	4.90347	-8.489
21:51:00	4.91042	-22.991
22:01:00	4.91736	-27.333
22:11:00	4.92431	-43.355
22:21:00	4.93125	-52.511
22:31:00	4.93819	-52.753
22:41:00	4.94514	-72.335
22:51:00	4.95208	-83.776
23:01:00	4.95903	-85.541
23:11:00	4.96597	-102.434
23:21:00	4.97292	-101.519
23:31:00	4.97986	-125.865
23:41:00	4.98681	-128.972
23:51:00	4.99375	-128.065
00:01:00	5.00069	-150.658
00:11:00	5.00764	-143.499
00:21:00	5.01458	-163.788
00:31:00	5.02153	-176.932
00:41:00	5.02847	-178.568
00:51:00	5.03542	-179.137
01:01:00	5.04236	-199.042
01:11:00	5.04931	-191.783
01:21:00	5.05625	-203.726
01:31:00	5.06319	-215.354
01:41:00	5.07014	-211.017
01:51:00	5.07708	-232.896
02:01:00	5.08403	-229.106
02:11:00	5.09097	-243.781
02:21:00	5.09792	-237.882
02:31:00	5.10486	-244.654
02:41:00	5.11181	-244.517
02:51:00	5.11875	-255.627
03:01:00	5.12569	-259.012
03:11:00	5.13264	-263.303
03:21:00	5.13958	-260.091
03:31:00	5.14653	-260.278
03:41:00	5.15347	-277.094
03:51:00	5.16042	-277.897
04:01:00	5.16736	-276.575
04:11:00	5.17431	-281.261
04:21:00	5.18125	-268.842
04:31:00	5.18819	-278.127
04:41:00	5.19514	-275.272
04:51:00	5.20208	-283.839
05:01:00	5.20903	-280.265
05:11:00	5.21597	-264.734
05:21:00	5.22292	-270.978
05:31:00	5.22986	-267.363
05:41:00	5.23681	-263.842
05:51:00	5.24375	-260.981
06:01:00	5.25069	-263.361
06:11:00	5.25764	-251.467
06:21:00	5.26458	-256.875
06:31:00	5.27153	-243.12
06:41:00	5.27847	-236.897
06:51:00	5.28542	-237.648
07:01:00	5.29236	-219.969
07:11:00	5.29931	-208.27
07:21:00	5.30625	-205.804
07:31:00	5.31319	-196.207
07:41:00	5.32014	-188.651
07:51:00	5.32708	-170.036
08:01:00	5.33403	-165.898
08:11:00	5.34097	-156.209
08:21:00	5.34792	-146.182
08:31:00	5.35486	-126.95
08:41:00	5.36181	-117.172
08:51:00	5.36875	-99.299
09:01:00	5.37569	-87.025
09:11:00	5.38264	-73.761
09:21:00	5.38958	-62.079
09:31:00	5.39653	-57.267
09:41:00	5.40347	-30.107
09:51:00	5.41042	-17.318
10:01:00	5.41736	-7.575
10:11:00	5.42431	12.822
10:21:00	5.43125	30.357
10:31:00	5.43819	39.573
10:41:00	5.44514	60.873
10:51:00	5.45208	75.113
11:01:00	5.45903	93.691
11:11:00	5.46597	109.282
11:21:00	5.47292	127.089
11:31:00	5.47986	127.993
11:41:00	5.48681	160.37
11:51:00	5.49375	173.874
12:01:00	5.50069	189.403
12:11:00	5.50764	195.793
12:21:00	5.51458	215.432
12:31:00	5.52153	218.086
12:41:00	5.52847	242.457
12:51:00	5.53542	249.717
13:01:00	5.54236	258.159
13:11:00	5.54931	266.682
13:21:00	5.55625	279.24
13:31:00	5.56319	279.466
13:41:00	5.57014	286.63
13:51:00	5.57708	297.815
14:01:00	5.58403	307.266
14:11:00	5.59097	305.831
14:21:00	5.59792	316.691
14:31:00	5.60486	315.125
14:41:00	5.61181	303.22
14:51:00	5.61875	322.229
15:01:00	5.62569	324.501
15:11:00	5.63264	316.714
15:21:00	5.63958	312.754
15:31:00	5.64653	327.012
15:41:00	5.65347	323.092
15:51:00	5.66042	315.871
16:01:00	5.66736	297.701
16:11:00	5.67431	301.793
16:21:00	5.68125	303.174
16:31:00	5.68819	294.227
16:41:00	5.69514	285.928
16:51:00	5.70208	281.058
17:01:00	5.70903	268.049
17:11:00	5.71597	262.023
17:21:00	5.72292	259.304
17:31:00	5.72986	249.265
17:41:00	5.73681	240.364
17:51:00	5.74375	229.236
18:01:00	5.75069	221.319
18:11:00	5.75764	210.822
18:21:00	5.76458	205.94
18:31:00	5.77153	198.807
18:41:00	5.77847	177.59
18:51:00	5.78542	183.601
19:01:00	5.79236	150.483
19:11:00	5.79931	164.951
19:21:00	5.80625	131.878
19:31:00	5.81319	136.319
19:41:00	5.82014	107.648
19:51:00	5.82708	114.353
20:01:00	5.83403	108.935
20:11:00	5.84097	89.256
20:21:00	5.84792	82.389
20:31:00	5.85486	68.82
20:41:00	5.86181	50.618
20:51:00	5.86875	43.259
21:01:00	5.87569	41.281
21:11:00	5.88264	41.34
21:21:00	5.88958	29.728
21:31:00	5.89653	12.236
21:41:00	5.90347	10.6
21:51:00	5.91042	-2.75
22:01:00	5.91736	-15.217
22:11:00	5.92431	-13.843
22:21:00	5.93125	-31.76
22:31:00	5.93819	-34.471
22:41:00	5.94514	-50.737
22:51:00	5.95208	-52.876
23:01:00	5.95903	-61.061
23:11:00	5.96597	-65.197
23:21:00	5.97292	-75.387
23:31:00	5.97986	-81.387
23:41:00	5.98681	-83.08
23:51:00	5.99375	-93.139
00:01:00	6.00069	-93.453
00:11:00	6.00764	-109.053
00:21:00	6.01458	-104.384
00:31:00	6.02153	-110.679
00:41:00	6.02847	-115.504
00:51:00	6.03542	-114.042
01:01:00	6.04236	-122.016
01:11:00	6.04931	-132.172
01:21:00	6.05625	-138.064
01:31:00	6.06319	-145.876
01:41:00	6.07014	-139.925
01:51:00	6.07708	-140.635
02:01:00	6.08403	-150.189
02:11:00	6.09097	-150.136
02:21:00	6.09792	-154.645
02:31:00	6.10486	-157.963
02:41:00	6.11181	-156.909
02:51:00	6.11875	-166.367
03:01:00	6.12569	-168.433
03:11:00	6.13264	-163.974
03:21:00	6.13958	-161.924
03:31:00	6.14653	-163.81
03:41:00	6.15347	-168.92
03:51:00	6.16042	-157.402
04:01:00	6.16736	-167.157
04:11:00	6.17431	-165.974
04:21:00	6.18125	-165.84
04:31:00	6.18819	-160.396
04:41:00	6.19514	-162.006
04:51:00	6.20208	-161.906
05:01:00	6.20903	-151.789
05:11:00	6.21597	-155.972
05:21:00	6.22292	-155.421
05:31:00	6.22986	-157.17
05:41:00	6.23681	-150.207
05:51:00	6.24375	-152.861
06:01:00	6.25069	-144.487
06:11:00	6.25764	-147.378
06:21:00	6.26458	-130.151
06:31:00	6.27153	-137.72
06:41:00	6.27847	-134.016
06:51:00	6.28542	-127.38
07:01:00	6.29236	-125.581
07:11:00	6.29931	-131.609
07:21:00	6.30625	-113.999
07:31:00	6.31319	-105.228
07:41:00	6.32014	-106.238
07:51:00	6.32708	-104.531
08:01:00	6.33403	-91.605
08:11:00	6.34097	-86.124
08:21:00	6.34792	-75.598
08:31:00	6.35486	-78.811
08:41:00	6.36181	-63.938
08:51:00	6.36875	-70.9
09:01:00	6.37569	-62.061
09:11:00	6.38264	-57.404
09:21:00	6.38958	-51.479
09:31:00	6.39653	-36.033
09:41:00	6.40347	-31.893
09:51:00	6.41042	-30.661
10:01:00	6.41736	-16.862
10:11:00	6.42431	-6.534
10:21:00	6.43125	-2.97
10:31:00	6.43819	-1.347
10:41:00	6.44514	0.972
10:51:00	6.45208	14.63
11:01:00	6.45903	10.275
11:11:00	6.46597	25.782
11:21:00	6.47292	30.234
11:31:00	6.47986	36.665
11:41:00	6.48681	39.894
11:51:00	6.49375	47.823
12:01:00	6.50069	56.076
12:11:00	6.50764	55.404
12:21:00	6.51458	62.827
12:31:00	6.52153	69.939
12:41:00	6.52847	72.362
12:51:00	6.53542	72.915
13:01:00	6.54236	77.343
13:11:00	6.54931	76.712
13:21:00	6.55625	87.83
13:31:00	6.56319	87.213
13:41:00	6.57014	89.27
13:51:00	6.57708	106.159
14:01:00	6.58403	102.473
14:11:00	6.59097	97.169
14:21:00	6.59792	107.36
14:31:00	6.60486	100.737
14:41:00	6.61181	106.809
14:51:00	6.61875	99.475
15:01:00	6.62569	99.42
15:11:00	6.63264	104.224
15:21:00	6.63958	100.171
15:31:00	6.64653	107.838
15:41:00	6.65347	97.052
15:51:00	6.66042	103.728
16:01:00	6.66736	101.5
16:11:00	6.67431	105.481
16:21:00	6.68125	102.393
16:31:00	6.68819	96.041
16:41:00	6.69514	97.39
16:51:00	6.70208	92.85
17:01:00	6.70903	90.53
17:11:00	6.71597	85.487
17:21:00	6.72292	88.748
17:31:00	6.72986	88.199
17:41:00	6.73681	80.281
17:51:00	6.74375	78.072
18:01:00	6.75069	85.609
18:11:00	6.75764	77.43
18:21:00	6.76458	75.474
18:31:00	6.77153	67.21
18:41:00	6.77847	68.649
18:51:00	6.78542	62.259
19:01:00	6.79236	54.683
19:11:00	6.79931	54.02
19:21:00	6.80625	44.614
19:31:00	6.81319	45.195
19:41:00	6.82014	38.858
19:51:00	6.82708	38.377
20:01:00	6.83403	35.578
20:11:00	6.84097	28.386
20:21:00	6.84792	22.497
20:31:00	6.85486	25.375
20:41:00	6.86181	21.457
20:51:00	6.86875	15.281
21:01:00	6.87569	17.008
21:11:00	6.88264	5.349
21:21:00	6.88958	2.828
21:31:00	6.89653	7.701
21:41:00	6.90347	4.762
21:51:00	6.91042	0.347
22:01:00	6.91736	0.606
22:11:00	6.92431	-7.529
22:21:00	6.93125	-12.289
22:31:00	6.93819	-16.69
22:41:00	6.94514	-21.274
22:51:00	6.95208	-21.314
23:01:00	6.95903	-26.766
23:11:00	6.96597	-22.805
23:21:00	6.97292	-27.84
23:31:00	6.97986	-35.141
23:41:00	6.98681	-30.378
23:51:00	6.99375	-41.352
00:01:00	7.00069	-40.916
00:11:00	7.00764	-41.682
00:21:00	7.01458	-49.444
00:31:00	7.02153	-47.132
00:41:00	7.02847	-49.295
00:51:00	7.03542	-56.421
01:01:00	7.04236	-45.504
01:11:00	7.04931	-55.772
01:21:00	7.05625	-51.193
01:31:00	7.06319	-60.801
01:41:00	7.07014	-56.177
01:51:00	7.07708	-59.196
02:01:00	7.08403	-55.105
02:11:00	7.09097	-55.732
02:21:00	7.09792	-62.578
02:31:00	7.10486	-60.84
02:41:00	7.11181	-56.737
02:51:00	7.11875	-54.685
03:01:00	7.12569	-60.468
03:11:00	7.13264	-63.109
03:21:00	7.13958	-60.492
03:31:00	7.14653	-57.3
03:41:00	7.15347	-63.239
03:51:00	7.16042	-57.333
04:01:00	7.16736	-59.119
04:11:00	7.17431	-54.291
04:21:00	7.18125	-54.23
04:31:00	7.18819	-49.938
04:41:00	7.19514	-61.969
04:51:00	7.20208	-53.653
05:01:00	7.20903	-57.626
05:11:00	7.21597	-55.432
05:21:00	7.22292	-54.791
05:31:00	7.22986	-49.771
05:41:00	7.23681	-49.077
05:51:00	7.24375	-52.069
06:01:00	7.25069	-55.761
06:11:00	7.25764	-46.826
06:21:00	7.26458	-44.54
06:31:00	7.27153	-50.925
06:41:00	7.27847	-42.575
06:51:00	7.28542	-41.389
07:01:00	7.29236	-38.867
07:11:00	7.29931	-33.64
07:21:00	7.30625	-33.33
07:31:00	7.31319	-29.946
07:41:00	7.32014	-29.566
07:51:00	7.32708	-21.049
08:01:00	7.33403	-19.99
08:11:00	7.34097	-19.629
08:21:00	7.34792	-20.958
08:31:00	7.35486	-21.975
08:41:00	7.36181	-18.24
08:51:00	7.36875	-22.381
09:01:00	7.37569	-14.352
09:11:00	7.38264	-15.995
09:21:00	7.38958	-9.315
09:31:00	7.39653	-3.927
09:41:00	7.40347	-10.278
09:51:00	7.41042	-4.85
10:01:00	7.41736	-6.427
10:11:00	7.42431	-7.714
10:21:00	7.43125	-6.561
10:31:00	7.43819	-1.44
10:41:00	7.44514	-2.094
10:51:00	7.45208	4.968
11:01:00	7.45903	5.237
11:11:00	7.46597	1.008
11:21:00	7.47292	2.436
11:31:00	7.47986	3.033
11:41:00	7.48681	9.849
11:51:00	7.49375	6.114
12:01:00	7.50069	2.953
12:11:00	7.50764	3.001
12:21:00	7.51458	6.226
12:31:00	7.52153	9.152
12:41:00	7.52847	2.134
12:51:00	7.53542	8.806
13:01:00	7.54236	11.106
13:11:00	7.54931	8.025
13:21:00	7.55625	11.008
13:31:00	7.56319	2.284
13:41:00	7.57014	2.142
13:51:00	7.57708	0.306
14:01:00	7.58403	6.58
14:11:00	7.59097	3.586
14:21:00	7.59792	-0.221
14:31:00	7.60486	3.628
14:41:00	7.61181	2.305
14:51:00	7.61875	0.704
15:01:00	7.62569	3.156
15:11:00	7.63264	5.377
15:21:00	7.63958	2.313
15:31:00	7.64653	-5.1
15:41:00	7.65347	-2.544
15:51:00	7.66042	-0.056
16:01:00	7.66736	-6.026
16:11:00	7.67431	-0.65
16:21:00	7.68125	3.504
16:31:00	7.68819	-6.683
16:41:00	7.69514	-3.505
16:51:00	7.70208	-2.575
17:01:00	7.70903	-3.897
17:11:00	7.71597	-1.845
17:21:00	7.72292	-7.84
17:31:00	7.72986	-8.826
17:41:00	7.73681	-3.367
17:51:00	7.74375	-6.965
18:01:00	7.75069	-7.769
18:11:00	7.75764	-9.092
18:21:00	7.76458	-12.714
18:31:00	7.77153	-17.791
18:41:00	7.77847	-15.461
18:51:00	7.78542	-13.462

## Sheet: cpc-3KO+3mM 3-AT
LumiCycle(Baseline subtracted)
Time (hr:min)	Time (days)	counts/sec
12:26:00	0.51806	-4.756
12:36:00	0.525	-1.439
12:46:00	0.53194	0.615
12:56:00	0.53889	2.05
13:06:00	0.54583	4.585
13:16:00	0.55278	3.686
13:26:00	0.55972	2.526
13:36:00	0.56667	2.582
13:46:00	0.57361	4.37
13:56:00	0.58056	5.655
14:06:00	0.5875	5.152
14:16:00	0.59444	6.39
14:26:00	0.60139	7.67
14:36:00	0.60833	5.954
14:46:00	0.61528	5.979
14:56:00	0.62222	7.456
15:06:00	0.62917	6.408
15:16:00	0.63611	7.369
15:26:00	0.64306	5.963
15:36:00	0.65	5.777
15:46:00	0.65694	5.002
15:56:00	0.66389	6.068
16:06:00	0.67083	7.667
16:16:00	0.67778	6.546
16:26:00	0.68472	6.808
16:36:00	0.69167	5.63
16:46:00	0.69861	6.215
16:56:00	0.70556	5.893
17:06:00	0.7125	4.523
17:16:00	0.71944	3.165
17:26:00	0.72639	5.275
17:36:00	0.73333	3.939
17:46:00	0.74028	4.15
17:56:00	0.74722	4.792
18:06:00	0.75417	3.163
18:16:00	0.76111	4.242
18:26:00	0.76806	4.058
18:36:00	0.775	1.845
18:46:00	0.78194	2.651
18:56:00	0.78889	2.632
19:06:00	0.79583	2.216
19:16:00	0.80278	1.985
19:26:00	0.80972	2.178
19:36:00	0.81667	2.874
19:46:00	0.82361	2.282
19:56:00	0.83056	1.431
20:06:00	0.8375	2.773
20:16:00	0.84444	0.993
20:26:00	0.85139	1.141
20:36:00	0.85833	1.602
20:46:00	0.86528	-0.044
20:56:00	0.87222	0.765
21:06:00	0.87917	2.301
21:16:00	0.88611	1.279
21:26:00	0.89306	0.583
21:36:00	0.9	1.574
21:46:00	0.90694	0.821
21:56:00	0.91389	1.801
22:06:00	0.92083	0.738
22:16:00	0.92778	0.071
22:26:00	0.93472	1.297
22:36:00	0.94167	1.288
22:46:00	0.94861	0.643
22:56:00	0.95556	0.016
23:06:00	0.9625	0.032
23:16:00	0.96944	0.485
23:26:00	0.97639	-0.6
23:36:00	0.98333	0.163
23:46:00	0.99028	0.105
23:56:00	0.99722	-0.937
00:06:00	1.00417	-0.85
00:16:00	1.01111	-0.61
00:26:00	1.01806	-1.616
00:36:00	1.025	-2.697
00:46:00	1.03194	-1.153
00:56:00	1.03889	-3.006
01:06:00	1.04583	-0.59
01:16:00	1.05278	-2.87
01:26:00	1.05972	-2.57
01:36:00	1.06667	-1.349
01:46:00	1.07361	-0.863
01:56:00	1.08056	-2.004
02:06:00	1.0875	-2.159
02:16:00	1.09444	-3.034
02:26:00	1.10139	-2.088
02:36:00	1.10833	-2.341
02:46:00	1.11528	-2.087
02:56:00	1.12222	-3.094
03:06:00	1.12917	-2.827
03:16:00	1.13611	-1.824
03:26:00	1.14306	-2.545
03:36:00	1.15	-3.699
03:46:00	1.15694	-2.764
03:56:00	1.16389	-3.859
04:06:00	1.17083	-4.234
04:16:00	1.17778	-1.008
04:26:00	1.18472	-2.832
04:36:00	1.19167	-3.746
04:46:00	1.19861	-3.835
04:56:00	1.20556	-4.854
05:06:00	1.2125	-1.795
05:16:00	1.21944	-4.626
05:26:00	1.22639	-1.324
05:36:00	1.23333	-4.625
05:46:00	1.24028	-5.751
05:56:00	1.24722	-5.012
06:06:00	1.25417	-3.882
06:16:00	1.26111	-3.644
06:26:00	1.26806	-3.145
06:36:00	1.275	-3.538
06:46:00	1.28194	-6.612
06:56:00	1.28889	-2.9
07:06:00	1.29583	-1.816
07:16:00	1.30278	-3.731
07:26:00	1.30972	-4.149
07:36:00	1.31667	-4.722
07:46:00	1.32361	-4.655
07:56:00	1.33056	-4.225
08:06:00	1.3375	-4.493
08:16:00	1.34444	-2.037
08:26:00	1.35139	-3.238
08:36:00	1.35833	-3.943
08:46:00	1.36528	-1.96
08:56:00	1.37222	-3.508
09:06:00	1.37917	-3.328
09:16:00	1.38611	-2.507
09:26:00	1.39306	-3.958
09:36:00	1.4	-3.865
09:46:00	1.40694	-4.251
09:56:00	1.41389	-3.165
10:06:00	1.42083	-1.225
10:16:00	1.42778	-1.024
10:26:00	1.43472	-0.156
10:36:00	1.44167	-0.164
10:46:00	1.44861	0.314
10:56:00	1.45556	-2.532
11:06:00	1.4625	-1.946
11:16:00	1.46944	-1.664
11:26:00	1.47639	-0.025
11:36:00	1.48333	1.216
11:46:00	1.49028	3.055
11:56:00	1.49722	1.496
12:06:00	1.50417	1.834
12:16:00	1.51111	1.846
12:26:00	1.51806	4.409
12:36:00	1.525	3.301
12:46:00	1.53194	2.144
12:56:00	1.53889	1.725
13:06:00	1.54583	2.957
13:16:00	1.55278	1.271
13:26:00	1.55972	2.342
13:36:00	1.56667	2.643
13:46:00	1.57361	1.785
13:56:00	1.58056	3.3
14:06:00	1.5875	2.141
14:16:00	1.59444	2.215
14:26:00	1.60139	3.158
14:36:00	1.60833	3.283
14:46:00	1.61528	3.326
14:56:00	1.62222	2.953
15:06:00	1.62917	3.167
15:16:00	1.63611	4.306
15:26:00	1.64306	2.884
15:36:00	1.65	3.255
15:46:00	1.65694	2.408
15:56:00	1.66389	4.071
16:06:00	1.67083	3.271
16:16:00	1.67778	5.044
16:26:00	1.68472	1.888
16:36:00	1.69167	0.528
16:46:00	1.69861	4.575
16:56:00	1.70556	1.637
17:06:00	1.7125	4.103
17:16:00	1.71944	2.765
17:26:00	1.72639	1.25
17:36:00	1.73333	2.698
17:46:00	1.74028	2.928
17:56:00	1.74722	3.34
18:06:00	1.75417	3.192
18:16:00	1.76111	1.873
18:26:00	1.76806	3.99
18:36:00	1.775	2.483
18:46:00	1.78194	3.082
18:56:00	1.78889	2.015
19:06:00	1.79583	3.315
19:16:00	1.80278	3.936
19:26:00	1.80972	1.457
19:36:00	1.81667	2.658
19:46:00	1.82361	2.611
19:56:00	1.83056	1.323
20:06:00	1.8375	3.744
20:16:00	1.84444	2.544
20:26:00	1.85139	2.632
20:36:00	1.85833	3.872
20:46:00	1.86528	2.31
20:56:00	1.87222	0.372
21:06:00	1.87917	2.075
21:16:00	1.88611	3.393
21:26:00	1.89306	3.942
21:36:00	1.9	2.887
21:46:00	1.90694	0.391
21:56:00	1.91389	0.884
22:06:00	1.92083	1.199
22:16:00	1.92778	1.651
22:26:00	1.93472	0.55
22:36:00	1.94167	2.736
22:46:00	1.94861	0.111
22:56:00	1.95556	1.59
23:06:00	1.9625	-0.29
23:16:00	1.96944	-0.998
23:26:00	1.97639	3.531
23:36:00	1.98333	1.739
23:46:00	1.99028	1.681
23:56:00	1.99722	1.742
00:06:00	2.00417	-0.602
00:16:00	2.01111	0.122
00:26:00	2.01806	-0.817
00:36:00	2.025	-2.24
00:46:00	2.03194	-0.24
00:56:00	2.03889	-2.094
01:06:00	2.04583	-2.456
01:16:00	2.05278	-1.776
01:26:00	2.05972	-0.804
01:36:00	2.06667	-2.515
01:46:00	2.07361	-3.056
01:56:00	2.08056	-2.289
02:06:00	2.0875	-1.341
02:16:00	2.09444	-0.282
02:26:00	2.10139	-2.498
02:36:00	2.10833	-2.539
02:46:00	2.11528	-3.992
02:56:00	2.12222	-3.22
03:06:00	2.12917	-3.082
03:16:00	2.13611	-2.754
03:26:00	2.14306	-0.549
03:36:00	2.15	-1.1
03:46:00	2.15694	-1.266
03:56:00	2.16389	-1.278
04:06:00	2.17083	-2.632
04:16:00	2.17778	-1.459
04:26:00	2.18472	-1.245
04:36:00	2.19167	-0.836
04:46:00	2.19861	-1.71
04:56:00	2.20556	-2.753
05:06:00	2.2125	-2.906
05:16:00	2.21944	-2.711
05:26:00	2.22639	-2.759
05:36:00	2.23333	-1.898
05:46:00	2.24028	-1.289
05:56:00	2.24722	-4.349
06:06:00	2.25417	-0.817
06:16:00	2.26111	-1.167
06:26:00	2.26806	-2.731
06:36:00	2.275	-1.767
06:46:00	2.28194	-0.382
06:56:00	2.28889	-0.58
07:06:00	2.29583	-1.672
07:16:00	2.30278	-0.606
07:26:00	2.30972	-0.06
07:36:00	2.31667	-0.597
07:46:00	2.32361	-2.171
07:56:00	2.33056	-1.225
08:06:00	2.3375	-1.502
08:16:00	2.34444	-1.231
08:26:00	2.35139	-2.571
08:36:00	2.35833	-0.494
08:46:00	2.36528	-0.161
08:56:00	2.37222	-1.203
09:06:00	2.37917	-0.059
09:16:00	2.38611	-0.514
09:26:00	2.39306	-0.347
09:36:00	2.4	-3.171
09:46:00	2.40694	1.234
09:56:00	2.41389	0.037
10:06:00	2.42083	-2.067
10:16:00	2.42778	0.662
10:26:00	2.43472	-1.441
10:36:00	2.44167	0.836
10:46:00	2.44861	0.169
10:56:00	2.45556	0.617
11:06:00	2.4625	-0.246
11:16:00	2.46944	-0.33
11:26:00	2.47639	-0.399
11:36:00	2.48333	-0.776
11:46:00	2.49028	-0.521
11:56:00	2.49722	1.646
12:06:00	2.50417	0.206
12:16:00	2.51111	-0.684
12:26:00	2.51806	1.695
12:36:00	2.525	1.06
12:46:00	2.53194	0.427
12:56:00	2.53889	-1.09
13:06:00	2.54583	1.172
13:16:00	2.55278	1.372
13:26:00	2.55972	1.015
13:36:00	2.56667	1.307
13:46:00	2.57361	0.055
13:56:00	2.58056	2.033
14:06:00	2.5875	1.173
14:16:00	2.59444	2.957
14:26:00	2.60139	0.312
14:36:00	2.60833	0.837
14:46:00	2.61528	1.664
14:56:00	2.62222	0.009
15:06:00	2.62917	1.118
15:16:00	2.63611	1.115
15:26:00	2.64306	0.261
15:36:00	2.65	0.492
15:46:00	2.65694	0.05
15:56:00	2.66389	0.199
16:06:00	2.67083	-1.185
16:16:00	2.67778	-0.242
16:26:00	2.68472	-0.206
16:36:00	2.69167	-1.212
16:46:00	2.69861	-0.026
16:56:00	2.70556	0.184
17:06:00	2.7125	-0.527
17:16:00	2.71944	-0.453
17:26:00	2.72639	-2.181
17:36:00	2.73333	-0.658
17:46:00	2.74028	1.075
17:56:00	2.74722	-0.704
18:06:00	2.75417	-2.105
18:16:00	2.76111	-1.573
18:26:00	2.76806	-0.354
18:36:00	2.775	-1.968
18:46:00	2.78194	-0.83
18:56:00	2.78889	-1.137
19:06:00	2.79583	-2.133
19:16:00	2.80278	-0.367
19:26:00	2.80972	-2.532
19:36:00	2.81667	-0.582
19:46:00	2.82361	-1.105
19:56:00	2.83056	-0.554
20:06:00	2.8375	-1.862
20:16:00	2.84444	-0.852
20:26:00	2.85139	0.513
20:36:00	2.85833	-1.523
20:46:00	2.86528	-0.57
20:56:00	2.87222	-1.111
21:06:00	2.87917	-0.744
21:16:00	2.88611	1.244
21:26:00	2.89306	0.909
21:36:00	2.9	-1.088
21:46:00	2.90694	1.522
21:56:00	2.91389	-1.282
22:06:00	2.92083	0.899
22:16:00	2.92778	-1.11
22:26:00	2.93472	-0.114
22:36:00	2.94167	-1.643
22:46:00	2.94861	-1.685
22:56:00	2.95556	-1.281
23:06:00	2.9625	-0.307
23:16:00	2.96944	-0.632
23:26:00	2.97639	-0.254
23:36:00	2.98333	0.035
23:46:00	2.99028	0.751
23:56:00	2.99722	0.676
00:06:00	3.00417	-0.343
00:16:00	3.01111	-2.31
00:26:00	3.01806	-1.062
00:36:00	3.025	2.419
00:46:00	3.03194	0.561
00:56:00	3.03889	-1.509
01:06:00	3.04583	-0.101
01:16:00	3.05278	0.056
01:26:00	3.05972	0.365
01:36:00	3.06667	-2.203
01:46:00	3.07361	-1.885
01:56:00	3.08056	-0.593
02:06:00	3.0875	-0.244
02:16:00	3.09444	-0.271
02:26:00	3.10139	1.13
02:36:00	3.10833	0.531
02:46:00	3.11528	0.138
02:56:00	3.12222	-0.245
03:06:00	3.12917	1.825
03:16:00	3.13611	0.683
03:26:00	3.14306	0.432
03:36:00	3.15	-0.68
03:46:00	3.15694	1.007
03:56:00	3.16389	1.437
04:06:00	3.17083	0.286
04:16:00	3.17778	3.137
04:26:00	3.18472	1.485
04:36:00	3.19167	1.747
04:46:00	3.19861	-0.472
04:56:00	3.20556	4.071
05:06:00	3.2125	1.405
05:16:00	3.21944	2.061
05:26:00	3.22639	3.321
05:36:00	3.23333	2.195
05:46:00	3.24028	3.092
05:56:00	3.24722	0.82
06:06:00	3.25417	2.116
06:16:00	3.26111	2.179
06:26:00	3.26806	1.316
06:36:00	3.275	2.863
06:46:00	3.28194	1.123
06:56:00	3.28889	2.94
07:06:00	3.29583	2.877
07:16:00	3.30278	3.308
07:26:00	3.30972	2.559
07:36:00	3.31667	3.087
07:46:00	3.32361	1.892
07:56:00	3.33056	1.254
08:06:00	3.3375	3.839
08:16:00	3.34444	3.232
08:26:00	3.35139	2.027
08:36:00	3.35833	2.06
08:46:00	3.36528	2.067
08:56:00	3.37222	1.102
09:06:00	3.37917	1.215
09:16:00	3.38611	2.278
09:26:00	3.39306	2.821
09:36:00	3.4	1.633
09:46:00	3.40694	0.331
09:56:00	3.41389	1.274
10:06:00	3.42083	0.547
10:16:00	3.42778	3.234
10:26:00	3.43472	1.951
10:36:00	3.44167	2.175
10:46:00	3.44861	1.932
10:56:00	3.45556	2.739
11:06:00	3.4625	0.654
11:16:00	3.46944	1.305
11:26:00	3.47639	0.506
11:36:00	3.48333	2.23
11:46:00	3.49028	0.095
11:56:00	3.49722	2.788
12:06:00	3.50417	2.212
12:16:00	3.51111	1.957
12:26:00	3.51806	3.59
12:36:00	3.525	1.257
12:46:00	3.53194	3.534
12:56:00	3.53889	2.208
13:06:00	3.54583	1.443
13:16:00	3.55278	0.016
13:26:00	3.55972	0.232
13:36:00	3.56667	-0.481
13:46:00	3.57361	0.861
13:56:00	3.58056	1.863
14:06:00	3.5875	0.922
14:16:00	3.59444	1.118
14:26:00	3.60139	0.673
14:36:00	3.60833	1.285
14:46:00	3.61528	1.32
14:56:00	3.62222	1.514
15:06:00	3.62917	-1.988
15:16:00	3.63611	0.319
15:26:00	3.64306	0.794
15:36:00	3.65	0.572
15:46:00	3.65694	0.84
15:56:00	3.66389	0.146
16:06:00	3.67083	0.41
16:16:00	3.67778	-1.048
16:26:00	3.68472	-0.215
16:36:00	3.69167	-1.965
16:46:00	3.69861	-0.626
16:56:00	3.70556	0.658
17:06:00	3.7125	-1.271
17:16:00	3.71944	-1.233
17:26:00	3.72639	-0.942
17:36:00	3.73333	-0.463
17:46:00	3.74028	-1.064
17:56:00	3.74722	-1.928
18:06:00	3.75417	-1.087
18:16:00	3.76111	-2.048
18:26:00	3.76806	-1.993
18:36:00	3.775	-2.884
18:46:00	3.78194	-3.795
18:56:00	3.78889	-0.911
19:06:00	3.79583	-0.247
19:16:00	3.80278	-2.656
19:26:00	3.80972	-1.265
19:36:00	3.81667	-2.761
19:46:00	3.82361	-1.426
19:56:00	3.83056	-1.986
20:06:00	3.8375	-1.758
20:16:00	3.84444	-1.31
20:26:00	3.85139	-1.52
20:36:00	3.85833	-1.748
20:46:00	3.86528	-1.219
20:56:00	3.87222	-2.865
21:06:00	3.87917	0.262
21:16:00	3.88611	-1.083
21:26:00	3.89306	-1.403
21:36:00	3.9	-2.341
21:46:00	3.90694	-1.145
21:56:00	3.91389	-2.268
22:06:00	3.92083	-2.025
22:16:00	3.92778	-2.36
22:26:00	3.93472	-1.677
22:36:00	3.94167	-1.031
22:46:00	3.94861	-1.739
22:56:00	3.95556	-1.136
23:06:00	3.9625	-2.058
23:16:00	3.96944	-0.222
23:26:00	3.97639	-2.173
23:36:00	3.98333	1.189
23:46:00	3.99028	-0.667
23:56:00	3.99722	-0.946
00:06:00	4.00417	-0.262
00:16:00	4.01111	0.151
00:26:00	4.01806	0.179
00:36:00	4.025	-0.331
00:46:00	4.03194	0.285
00:56:00	4.03889	-0.196
01:06:00	4.04583	-1.764
01:16:00	4.05278	-1.579
01:26:00	4.05972	-1.291
01:36:00	4.06667	1.036
01:46:00	4.07361	1.012
01:56:00	4.08056	-1.341
02:06:00	4.0875	-2.115
02:16:00	4.09444	0.606
02:26:00	4.10139	-0.751
02:36:00	4.10833	-1.188
02:46:00	4.11528	0.432
02:56:00	4.12222	0.591
03:06:00	4.12917	0.72
03:16:00	4.13611	-1.056
03:26:00	4.14306	0.628
03:36:00	4.15	1.382
03:46:00	4.15694	1.891
03:56:00	4.16389	0.677
04:06:00	4.17083	0.754
04:16:00	4.17778	-1.475
04:26:00	4.18472	-0.544
04:36:00	4.19167	-0.266
04:46:00	4.19861	0.296
04:56:00	4.20556	-1.285
05:06:00	4.2125	-0.731
05:16:00	4.21944	0.993
05:26:00	4.22639	0.451
05:36:00	4.23333	1.68
05:46:00	4.24028	0.359
05:56:00	4.24722	-0.611
06:06:00	4.25417	0.839
06:16:00	4.26111	1.928
06:26:00	4.26806	-0.072
06:36:00	4.275	2.089
06:46:00	4.28194	-0.387
06:56:00	4.28889	0.568
07:06:00	4.29583	0.375
07:16:00	4.30278	0.063
07:26:00	4.30972	1.283
07:36:00	4.31667	0.203
07:46:00	4.32361	-0.091
07:56:00	4.33056	1.995
08:06:00	4.3375	-0.035
08:16:00	4.34444	-0.094
08:26:00	4.35139	0.789
08:36:00	4.35833	0.911
08:46:00	4.36528	-0.14
08:56:00	4.37222	0.774
09:06:00	4.37917	1.493
09:16:00	4.38611	-1.125
09:26:00	4.39306	-0.472
09:36:00	4.4	1.69
09:46:00	4.40694	1.468
09:56:00	4.41389	-0.835
10:06:00	4.42083	0.475
10:16:00	4.42778	2.332
10:26:00	4.43472	-0.413
10:36:00	4.44167	0.867
10:46:00	4.44861	0.893
10:56:00	4.45556	0.649
11:06:00	4.4625	1.312
11:16:00	4.46944	0.095
11:26:00	4.47639	0.345
11:36:00	4.48333	1.106
11:46:00	4.49028	1.941
11:56:00	4.49722	0.177
12:06:00	4.50417	1.796
12:16:00	4.51111	1.724
12:26:00	4.51806	1.722
12:36:00	4.525	1.527
12:46:00	4.53194	1.623
12:56:00	4.53889	1.003
13:06:00	4.54583	2.633
13:16:00	4.55278	0.008
13:26:00	4.55972	2.209
13:36:00	4.56667	1.453
13:46:00	4.57361	2.727
13:56:00	4.58056	-0.297
14:06:00	4.5875	1.787
14:16:00	4.59444	-0.7
14:26:00	4.60139	0.579
14:36:00	4.60833	2.769
14:46:00	4.61528	2.253
14:56:00	4.62222	1.639
15:06:00	4.62917	1.168
15:16:00	4.63611	1.083
15:26:00	4.64306	1.002
15:36:00	4.65	2.107
15:46:00	4.65694	0.283
15:56:00	4.66389	0.955
16:06:00	4.67083	1.741
16:16:00	4.67778	0.537
16:26:00	4.68472	2.746
16:36:00	4.69167	0.995
16:46:00	4.69861	0.013
16:56:00	4.70556	0.772
17:06:00	4.7125	1.155
17:16:00	4.71944	0.391
17:26:00	4.72639	2.053
17:36:00	4.73333	1.078
17:46:00	4.74028	2.643
17:56:00	4.74722	1.36
18:06:00	4.75417	0.655
18:16:00	4.76111	2.073
18:26:00	4.76806	-0.684
18:36:00	4.775	-0.426
18:46:00	4.78194	2.025
18:56:00	4.78889	0.657
19:06:00	4.79583	0.613
19:16:00	4.80278	1.549
19:26:00	4.80972	1.654
19:36:00	4.81667	1.772
19:46:00	4.82361	-0.443
19:56:00	4.83056	1.541
20:06:00	4.8375	-0.464
20:16:00	4.84444	1.086
20:26:00	4.85139	-0.551
20:36:00	4.85833	-0.444
20:46:00	4.86528	1.097
20:56:00	4.87222	0.038
21:06:00	4.87917	2.284
21:16:00	4.88611	0.691
21:26:00	4.89306	-0.399
21:36:00	4.9	2.087
21:46:00	4.90694	1.247
21:56:00	4.91389	-2.09
22:06:00	4.92083	-1.193
22:16:00	4.92778	1.617
22:26:00	4.93472	0.658
22:36:00	4.94167	0.276
22:46:00	4.94861	-1.165
22:56:00	4.95556	0.776
23:06:00	4.9625	1.082
23:16:00	4.96944	0.381
23:26:00	4.97639	-0.112
23:36:00	4.98333	1.205
23:46:00	4.99028	-2.18
23:56:00	4.99722	2.041
00:06:00	5.00417	1.811
00:16:00	5.01111	0.843
00:26:00	5.01806	0.784
00:36:00	5.025	-0.16
00:46:00	5.03194	-0.765
00:56:00	5.03889	-0.25
01:06:00	5.04583	-2.617
01:16:00	5.05278	-1.837
01:26:00	5.05972	-0.783
01:36:00	5.06667	-0.629
01:46:00	5.07361	0.547
01:56:00	5.08056	0.663
02:06:00	5.0875	-0.497
02:16:00	5.09444	-1.984
02:26:00	5.10139	-0.449
02:36:00	5.10833	-1.642
02:46:00	5.11528	1.822
02:56:00	5.12222	-0.673
03:06:00	5.12917	0.34
03:16:00	5.13611	-1.152
03:26:00	5.14306	-0.287
03:36:00	5.15	-1.217
03:46:00	5.15694	0.323
03:56:00	5.16389	-0.982
04:06:00	5.17083	0.488
04:16:00	5.17778	-0.819
04:26:00	5.18472	-1.077
04:36:00	5.19167	-0.061
04:46:00	5.19861	-0.134
04:56:00	5.20556	0.335
05:06:00	5.2125	0.041
05:16:00	5.21944	-0.823
05:26:00	5.22639	-0.997
05:36:00	5.23333	0.59
05:46:00	5.24028	-0.633
05:56:00	5.24722	-1.427
06:06:00	5.25417	1.114
06:16:00	5.26111	0.529
06:26:00	5.26806	-0.613
06:36:00	5.275	-2.175
06:46:00	5.28194	-2.086
06:56:00	5.28889	0.895
07:06:00	5.29583	0.539
07:16:00	5.30278	0.07
07:26:00	5.30972	0.493
07:36:00	5.31667	-0.249
07:46:00	5.32361	3.047
07:56:00	5.33056	1.005
08:06:00	5.3375	-1.281
08:16:00	5.34444	0.207
08:26:00	5.35139	0.587
08:36:00	5.35833	0.432
08:46:00	5.36528	-0.427
08:56:00	5.37222	0.025
09:06:00	5.37917	-0.81
09:16:00	5.38611	-1.4
09:26:00	5.39306	-1.001
09:36:00	5.4	0.062
09:46:00	5.40694	0.392
09:56:00	5.41389	0.523
10:06:00	5.42083	-0.186
10:16:00	5.42778	-0.29
10:26:00	5.43472	-0.09
10:36:00	5.44167	2.299
10:46:00	5.44861	1.616
10:56:00	5.45556	-1.735
11:06:00	5.4625	0.489
11:16:00	5.46944	-0.972
11:26:00	5.47639	-2.124
11:36:00	5.48333	0.949
11:46:00	5.49028	-0.672
11:56:00	5.49722	1.137
12:06:00	5.50417	-2.477
12:16:00	5.51111	0.648
12:26:00	5.51806	-1.467
12:36:00	5.525	-0.715
12:46:00	5.53194	0.71
12:56:00	5.53889	-0.555
13:06:00	5.54583	-0.616
13:16:00	5.55278	-1.127
13:26:00	5.55972	0.891
13:36:00	5.56667	-0.741
13:46:00	5.57361	-1.629
13:56:00	5.58056	1.394
14:06:00	5.5875	0.627
14:16:00	5.59444	1.366
14:26:00	5.60139	0.047
14:36:00	5.60833	-0.083
14:46:00	5.61528	0.384
14:56:00	5.62222	-1.483
15:06:00	5.62917	0.117
15:16:00	5.63611	-0.771
15:26:00	5.64306	-1.148
15:36:00	5.65	0.005
15:46:00	5.65694	0.159
15:56:00	5.66389	0.224
16:06:00	5.67083	-0.201
16:16:00	5.67778	-1.308
16:26:00	5.68472	-0.616
16:36:00	5.69167	1.409
16:46:00	5.69861	1.751
16:56:00	5.70556	1.166
17:06:00	5.7125	1.368
17:16:00	5.71944	-0.378
17:26:00	5.72639	0.024
17:36:00	5.73333	-0.319
17:46:00	5.74028	1.834
17:56:00	5.74722	0.597
18:06:00	5.75417	-0.086
18:16:00	5.76111	-1.227
18:26:00	5.76806	0.927
18:36:00	5.775	-0.528
18:46:00	5.78194	-1.027
18:56:00	5.78889	-2.415
19:06:00	5.79583	-0.368
19:16:00	5.80278	-0.305
19:26:00	5.80972	-0.504
19:36:00	5.81667	0.395
19:46:00	5.82361	0.193
19:56:00	5.83056	-0.656
20:06:00	5.8375	-1.087
20:16:00	5.84444	-0.229
20:26:00	5.85139	0.373
20:36:00	5.85833	1.103
20:46:00	5.86528	0.145
20:56:00	5.87222	-0.596
21:06:00	5.87917	0.52
21:16:00	5.88611	0.678
21:26:00	5.89306	0.027
21:36:00	5.9	0.521
21:46:00	5.90694	-0.877
21:56:00	5.91389	0.161
22:06:00	5.92083	-0.715
22:16:00	5.92778	1.044
22:26:00	5.93472	2.537
22:36:00	5.94167	-0.608
22:46:00	5.94861	-0.034
22:56:00	5.95556	0.452
23:06:00	5.9625	0.209
23:16:00	5.96944	0.834
23:26:00	5.97639	-0.857
23:36:00	5.98333	0.157
23:46:00	5.99028	-0.375
23:56:00	5.99722	0.93
00:06:00	6.00417	1.407
00:16:00	6.01111	1.553
00:26:00	6.01806	0.635
00:36:00	6.025	1.64
00:46:00	6.03194	-0.456
00:56:00	6.03889	-1.127
01:06:00	6.04583	0.407
01:16:00	6.05278	1.178
01:26:00	6.05972	-1.902
01:36:00	6.06667	1.285
01:46:00	6.07361	0.516
01:56:00	6.08056	-0.655
02:06:00	6.0875	-0.839
02:16:00	6.09444	-0.375
02:26:00	6.10139	0.336
02:36:00	6.10833	-0.908
02:46:00	6.11528	-0.194
02:56:00	6.12222	1.381
03:06:00	6.12917	0.427
03:16:00	6.13611	-1.559
03:26:00	6.14306	0.915
03:36:00	6.15	1.829
03:46:00	6.15694	1.2
03:56:00	6.16389	0.486
04:06:00	6.17083	0.893
04:16:00	6.17778	-0.632
04:26:00	6.18472	0.082
04:36:00	6.19167	1.322
04:46:00	6.19861	1.709
04:56:00	6.20556	0.692
05:06:00	6.2125	-0.334
05:16:00	6.21944	-0.369
05:26:00	6.22639	0.442
05:36:00	6.23333	0.201
05:46:00	6.24028	-1.688
05:56:00	6.24722	-1.93
06:06:00	6.25417	0.523
06:16:00	6.26111	-0.718
06:26:00	6.26806	-1.047
06:36:00	6.275	2.323
06:46:00	6.28194	-0.355
06:56:00	6.28889	-0.982
07:06:00	6.29583	-0.086
07:16:00	6.30278	0.541
07:26:00	6.30972	-0.523
07:36:00	6.31667	0.597
07:46:00	6.32361	-0.867
07:56:00	6.33056	-1.553
08:06:00	6.3375	2.962
08:16:00	6.34444	-0.882
08:26:00	6.35139	1.386
08:36:00	6.35833	0.818
08:46:00	6.36528	-0.433
08:56:00	6.37222	-1.777
09:06:00	6.37917	-1.761
09:16:00	6.38611	1.481
09:26:00	6.39306	-2.423
09:36:00	6.4	-0.042
09:46:00	6.40694	-1.306
09:56:00	6.41389	0.584
10:06:00	6.42083	-0.769
10:16:00	6.42778	-0.294
10:26:00	6.43472	-1.884
10:36:00	6.44167	0.177
10:46:00	6.44861	-1.372
10:56:00	6.45556	-0.606
11:06:00	6.4625	-0.243
11:16:00	6.46944	-0.487
11:26:00	6.47639	0.503
11:36:00	6.48333	-0.792
11:46:00	6.49028	1.23
11:56:00	6.49722	-0.481
12:06:00	6.50417	0.237
12:16:00	6.51111	0.193
12:26:00	6.51806	1.18
12:36:00	6.525	0.618
12:46:00	6.53194	-0.717
12:56:00	6.53889	-1.551
13:06:00	6.54583	-0.439
13:16:00	6.55278	-0.17
13:26:00	6.55972	0.746
13:36:00	6.56667	-0.526
13:46:00	6.57361	0.814
13:56:00	6.58056	0.399
14:06:00	6.5875	-0.405
14:16:00	6.59444	-1.093
14:26:00	6.60139	2.381
14:36:00	6.60833	0.167
14:46:00	6.61528	-0.051
14:56:00	6.62222	0.378
15:06:00	6.62917	-0.346
15:16:00	6.63611	-0.725
15:26:00	6.64306	0.719
15:36:00	6.65	0.343
15:46:00	6.65694	1.037
15:56:00	6.66389	0.715
16:06:00	6.67083	1.395
16:16:00	6.67778	1.11
16:26:00	6.68472	-0.573
16:36:00	6.69167	-1.251
16:46:00	6.69861	-0.438
16:56:00	6.70556	1.933
17:06:00	6.7125	0.092
17:16:00	6.71944	-0.709
17:26:00	6.72639	0.47
17:36:00	6.73333	0.536
17:46:00	6.74028	1.648
17:56:00	6.74722	-0.963
18:06:00	6.75417	-1.803
18:16:00	6.76111	-0.93
18:26:00	6.76806	-0.433
18:36:00	6.775	0.041
18:46:00	6.78194	-1.588
18:56:00	6.78889	-0.583
19:06:00	6.79583	0.017
19:16:00	6.80278	-1.114
19:26:00	6.80972	-1.054
19:36:00	6.81667	0.479
19:46:00	6.82361	0.142
19:56:00	6.83056	1.742
20:06:00	6.8375	-1.211
20:16:00	6.84444	-0.781
20:26:00	6.85139	0.325
20:36:00	6.85833	-1.011
20:46:00	6.86528	-0.991
20:56:00	6.87222	0.109
21:06:00	6.87917	1.068
21:16:00	6.88611	-1.323
21:26:00	6.89306	0.134
21:36:00	6.9	-1.49
21:46:00	6.90694	0.758
21:56:00	6.91389	-1.431
22:06:00	6.92083	0.078
22:16:00	6.92778	0.769
22:26:00	6.93472	-0.752
22:36:00	6.94167	-0.742
22:46:00	6.94861	0.314
22:56:00	6.95556	0.649
23:06:00	6.9625	1.165
23:16:00	6.96944	1.802
23:26:00	6.97639	-1.818
23:36:00	6.98333	-0.652
23:46:00	6.99028	-0.681
23:56:00	6.99722	0.372
00:06:00	7.00417	-0.142
00:16:00	7.01111	-0.366
00:26:00	7.01806	1.664
00:36:00	7.025	-2.671
00:46:00	7.03194	-0.452
00:56:00	7.03889	0.5
01:06:00	7.04583	0.567
01:16:00	7.05278	0.294
01:26:00	7.05972	-0.57
01:36:00	7.06667	1.197
01:46:00	7.07361	0.464
01:56:00	7.08056	-0.373
02:06:00	7.0875	0.724
02:16:00	7.09444	-0.463
02:26:00	7.10139	-0.677
02:36:00	7.10833	-1.857
02:46:00	7.11528	-0.038
02:56:00	7.12222	-1.932
03:06:00	7.12917	-0.732
03:16:00	7.13611	0.365
03:26:00	7.14306	0.835
03:36:00	7.15	0.495
03:46:00	7.15694	-0.673
03:56:00	7.16389	-1.289
04:06:00	7.17083	-0.101
04:16:00	7.17778	0.617
04:26:00	7.18472	0.401
04:36:00	7.19167	-0.177
04:46:00	7.19861	-0.595
04:56:00	7.20556	-1.207
05:06:00	7.2125	-0.372
05:16:00	7.21944	-1.508
05:26:00	7.22639	1.746
05:36:00	7.23333	0.424
05:46:00	7.24028	0.003
05:56:00	7.24722	0.458
06:06:00	7.25417	-0.366
06:16:00	7.26111	-0.876
06:26:00	7.26806	-2.222
06:36:00	7.275	-0.859
06:46:00	7.28194	0.512
06:56:00	7.28889	-0.005
07:06:00	7.29583	0.565
07:16:00	7.30278	-1.076
07:26:00	7.30972	0.72
07:36:00	7.31667	-1.028
07:46:00	7.32361	-0.24
07:56:00	7.33056	0.636
08:06:00	7.3375	1.151
08:16:00	7.34444	-0.256
08:26:00	7.35139	0.785
08:36:00	7.35833	0.021
08:46:00	7.36528	-0.513
08:56:00	7.37222	-0.538
09:06:00	7.37917	0.889
09:16:00	7.38611	1.578
09:26:00	7.39306	-0.621
09:36:00	7.4	-1.229
09:46:00	7.40694	-0.347
09:56:00	7.41389	-0.112
10:06:00	7.42083	0.021
10:16:00	7.42778	0.661
10:26:00	7.43472	-0.841
10:36:00	7.44167	-0.714
10:46:00	7.44861	-0.547
10:56:00	7.45556	-0.115
11:06:00	7.4625	0.651
11:16:00	7.46944	-0.17
11:26:00	7.47639	0.498
11:36:00	7.48333	0.531
11:46:00	7.49028	-0.351
11:56:00	7.49722	-0.492
12:06:00	7.50417	0.693
12:16:00	7.51111	0.499
12:26:00	7.51806	-1.51
12:36:00	7.525	-0.395
12:46:00	7.53194	-0.366
12:56:00	7.53889	-1.21
13:06:00	7.54583	2.148
13:16:00	7.55278	0.081
13:26:00	7.55972	0.326
13:36:00	7.56667	-0.034
13:46:00	7.57361	2.056
13:56:00	7.58056	0.099
14:06:00	7.5875	-1.027
14:16:00	7.59444	-0.225
14:26:00	7.60139	1.027
14:36:00	7.60833	0.229
14:46:00	7.61528	0.549
14:56:00	7.62222	-1.883
15:06:00	7.62917	-1.472
15:16:00	7.63611	-2.538
15:26:00	7.64306	0.57
15:36:00	7.65	-1.127
15:46:00	7.65694	0.623
15:56:00	7.66389	-0.472
16:06:00	7.67083	-0.735
16:16:00	7.67778	0.533
16:26:00	7.68472	0.581
16:36:00	7.69167	-0.933
16:46:00	7.69861	-0.166
16:56:00	7.70556	0.791
17:06:00	7.7125	0.963
17:16:00	7.71944	0.222
17:26:00	7.72639	1.455
17:36:00	7.73333	0.779
17:46:00	7.74028	0.999
17:56:00	7.74722	-0.54
18:06:00	7.75417	0.747
18:16:00	7.76111	-1.01
18:26:00	7.76806	-0.908
18:36:00	7.775	-0.539
18:46:00	7.78194	1.381
18:56:00	7.78889	-1.05

## Sheet: cpc-1KO+3mM 3-AT
LumiCycle: (Baseline subtracted)
Time (hr:min)	Time (days)	counts/sec
12:26:00	1.05278	-7.724
12:36:00	1.05972	-6.139
12:46:00	1.06667	-6.975
12:56:00	1.07361	-7.687
13:06:00	1.08056	-8.449
13:16:00	1.0875	-6.435
13:26:00	1.09444	-5.184
13:36:00	1.10139	-5.636
13:46:00	1.10833	-5.919
13:56:00	1.11528	-9.101
14:06:00	1.12222	-8.473
14:16:00	1.12917	-9.999
14:26:00	1.13611	-8.119
14:36:00	1.14306	-8.475
14:46:00	1.15	-9.556
14:56:00	1.15694	-6.871
15:06:00	1.16389	-7.852
15:16:00	1.17083	-6.871
15:26:00	1.17778	-8.934
15:36:00	1.18472	-9.027
15:46:00	1.19167	-8.313
15:56:00	1.19861	-8.417
16:06:00	1.20556	-8.18
16:16:00	1.2125	-7.234
16:26:00	1.21944	-6.738
16:36:00	1.22639	-7.732
16:46:00	1.23333	-6.43
16:56:00	1.24028	-7.323
17:06:00	1.24722	-4.507
17:16:00	1.25417	-6.266
17:26:00	1.26111	-5.751
17:36:00	1.26806	-6.218
17:46:00	1.275	-4.529
17:56:00	1.28194	-5.361
18:06:00	1.28889	-3.976
18:16:00	1.29583	-2.871
18:26:00	1.30278	-3.771
18:36:00	1.30972	1.118
18:46:00	1.31667	-0.661
18:56:00	1.32361	-1.756
19:06:00	1.33056	-0.552
19:16:00	1.3375	0.696
19:26:00	1.34444	-0.043
19:36:00	1.35139	1.112
19:46:00	1.35833	2.793
19:56:00	1.36528	4.128
20:06:00	1.37222	1.503
20:16:00	1.37917	3.272
20:26:00	1.38611	3.935
20:36:00	1.39306	4.273
20:46:00	1.4	2.612
20:56:00	1.40694	4.55
21:06:00	1.41389	6.678
21:16:00	1.42083	6.561
21:26:00	1.42778	6.917
21:36:00	1.43472	7.275
21:46:00	1.44167	10.789
21:56:00	1.44861	9.226
22:06:00	1.45556	11.306
22:16:00	1.4625	8.604
22:26:00	1.46944	8.134
22:36:00	1.47639	9.765
22:46:00	1.48333	10.268
22:56:00	1.49028	9.682
23:06:00	1.49722	11.546
23:16:00	1.50417	9.996
23:26:00	1.51111	13.788
23:36:00	1.51806	10.632
23:46:00	1.525	13.647
23:56:00	1.53194	11.193
00:06:00	1.53889	12.988
00:16:00	1.54583	13.141
00:26:00	1.55278	11.468
00:36:00	1.55972	13.509
00:46:00	1.56667	15.031
00:56:00	1.57361	11.939
01:06:00	1.58056	13.204
01:16:00	1.5875	12.299
01:26:00	1.59444	13.273
01:36:00	1.60139	12.847
01:46:00	1.60833	10.917
01:56:00	1.61528	14.052
02:06:00	1.62222	12.395
02:16:00	1.62917	11.841
02:26:00	1.63611	13.622
02:36:00	1.64306	12.233
02:46:00	1.65	11.287
02:56:00	1.65694	9.749
03:06:00	1.66389	9.555
03:16:00	1.67083	10.323
03:26:00	1.67778	10.36
03:36:00	1.68472	8.988
03:46:00	1.69167	9.267
03:56:00	1.69861	8.739
04:06:00	1.70556	8.122
04:16:00	1.7125	7.021
04:26:00	1.71944	9.201
04:36:00	1.72639	7.437
04:46:00	1.73333	5.854
04:56:00	1.74028	6.537
05:06:00	1.74722	5.983
05:16:00	1.75417	5.249
05:26:00	1.76111	6.39
05:36:00	1.76806	5.546
05:46:00	1.775	3.591
05:56:00	1.78194	3.713
06:06:00	1.78889	4.268
06:16:00	1.79583	3.413
06:26:00	1.80278	1.746
06:36:00	1.80972	1.712
06:46:00	1.81667	1.27
06:56:00	1.82361	0.985
07:06:00	1.83056	0.824
07:16:00	1.8375	0.533
07:26:00	1.84444	2.804
07:36:00	1.85139	1.555
07:46:00	1.85833	0.702
07:56:00	1.86528	1.549
08:06:00	1.87222	-1.264
08:16:00	1.87917	0.301
08:26:00	1.88611	-0.875
08:36:00	1.89306	-2.072
08:46:00	1.9	-1.966
08:56:00	1.90694	-1.08
09:06:00	1.91389	-0.966
09:16:00	1.92083	0.236
09:26:00	1.92778	-1.236
09:36:00	1.93472	-0.317
09:46:00	1.94167	-0.802
09:56:00	1.94861	-1.398
10:06:00	1.95556	-2.377
10:16:00	1.9625	-3.065
10:26:00	1.96944	-2.001
10:36:00	1.97639	-4.118
10:46:00	1.98333	-3.15
10:56:00	1.99028	-4.524
11:06:00	1.99722	-2.98
11:16:00	2.00417	-4.296
11:26:00	2.01111	-3.346
11:36:00	2.01806	-1.577
11:46:00	2.025	-3.906
11:56:00	2.03194	-2.189
12:06:00	2.03889	-3.433
12:16:00	2.04583	-2.714
12:26:00	2.05278	-4.366
12:36:00	2.05972	-2.632
12:46:00	2.06667	-2.889
12:56:00	2.07361	-3.541
13:06:00	2.08056	-5.519
13:16:00	2.0875	-4.645
13:26:00	2.09444	-2.638
13:36:00	2.10139	-3.278
13:46:00	2.10833	-2.189
13:56:00	2.11528	-1.938
14:06:00	2.12222	-5.226
14:16:00	2.12917	-4.385
14:26:00	2.13611	-3.685
14:36:00	2.14306	-3.402
14:46:00	2.15	-3.725
14:56:00	2.15694	-2.972
15:06:00	2.16389	-3.575
15:16:00	2.17083	-3.672
15:26:00	2.17778	-3.824
15:36:00	2.18472	-5.027
15:46:00	2.19167	-3.539
15:56:00	2.19861	-4.252
16:06:00	2.20556	-3.841
16:16:00	2.2125	-2.668
16:26:00	2.21944	-3.069
16:36:00	2.22639	-3.71
16:46:00	2.23333	-2.757
16:56:00	2.24028	-3.482
17:06:00	2.24722	-1.775
17:16:00	2.25417	-2.324
17:26:00	2.26111	-1.773
17:36:00	2.26806	-2.166
17:46:00	2.275	0.447
17:56:00	2.28194	1.077
18:06:00	2.28889	-0.66
18:16:00	2.29583	-2.266
18:26:00	2.30278	-1.668
18:36:00	2.30972	0.722
18:46:00	2.31667	-0.51
18:56:00	2.32361	-0.75
19:06:00	2.33056	-1.868
19:16:00	2.3375	-1.695
19:26:00	2.34444	1.133
19:36:00	2.35139	0.747
19:46:00	2.35833	0.581
19:56:00	2.36528	0.061
20:06:00	2.37222	0.923
20:16:00	2.37917	1.383
20:26:00	2.38611	0.032
20:36:00	2.39306	1.652
20:46:00	2.4	1.11
20:56:00	2.40694	1.099
21:06:00	2.41389	0.561
21:16:00	2.42083	1.188
21:26:00	2.42778	0.79
21:36:00	2.43472	2.297
21:46:00	2.44167	1.365
21:56:00	2.44861	1.921
22:06:00	2.45556	0.414
22:16:00	2.4625	4.003
22:26:00	2.46944	1.779
22:36:00	2.47639	1.75
22:46:00	2.48333	0.438
22:56:00	2.49028	4.534
23:06:00	2.49722	1.478
23:16:00	2.50417	1.535
23:26:00	2.51111	2.004
23:36:00	2.51806	1.808
23:46:00	2.525	1.063
23:56:00	2.53194	1.067
00:06:00	2.53889	2.196
00:16:00	2.54583	3.386
00:26:00	2.55278	1.656
00:36:00	2.55972	4.329
00:46:00	2.56667	2.601
00:56:00	2.57361	2.4
01:06:00	2.58056	2.671
01:16:00	2.5875	2.649
01:26:00	2.59444	2.804
01:36:00	2.60139	0.992
01:46:00	2.60833	1.01
01:56:00	2.61528	2.236
02:06:00	2.62222	0.61
02:16:00	2.62917	2.53
02:26:00	2.63611	1.464
02:36:00	2.64306	1.432
02:46:00	2.65	1.209
02:56:00	2.65694	2.759
03:06:00	2.66389	0.836
03:16:00	2.67083	-0.85
03:26:00	2.67778	0.409
03:36:00	2.68472	1.444
03:46:00	2.69167	-0.193
03:56:00	2.69861	1.804
04:06:00	2.70556	-0.606
04:16:00	2.7125	0.247
04:26:00	2.71944	-0.405
04:36:00	2.72639	-0.818
04:46:00	2.73333	-1.806
04:56:00	2.74028	-1.661
05:06:00	2.74722	-1.498
05:16:00	2.75417	-0.478
05:26:00	2.76111	-1.347
05:36:00	2.76806	-2.28
05:46:00	2.775	-1.338
05:56:00	2.78194	-0.142
06:06:00	2.78889	-1.551
06:16:00	2.79583	-0.389
06:26:00	2.80278	-0.2
06:36:00	2.80972	-1.066
06:46:00	2.81667	-1.705
06:56:00	2.82361	-0.743
07:06:00	2.83056	-0.439
07:16:00	2.8375	-0.404
07:26:00	2.84444	-2.724
07:36:00	2.85139	-1.761
07:46:00	2.85833	-0.992
07:56:00	2.86528	-0.065
08:06:00	2.87222	-4.449
08:16:00	2.87917	-2.222
08:26:00	2.88611	-3.131
08:36:00	2.89306	-1.6
08:46:00	2.9	-1.848
08:56:00	2.90694	-2.186
09:06:00	2.91389	-3.108
09:16:00	2.92083	-3.195
09:26:00	2.92778	-1.2
09:36:00	2.93472	-2.643
09:46:00	2.94167	0.122
09:56:00	2.94861	-1.292
10:06:00	2.95556	-1.092
10:16:00	2.9625	-3.1
10:26:00	2.96944	-0.979
10:36:00	2.97639	-1.028
10:46:00	2.98333	0.085
10:56:00	2.99028	-0.991
11:06:00	2.99722	-1.333
11:16:00	3.00417	-1.415
11:26:00	3.01111	-0.798
11:36:00	3.01806	-1.277
11:46:00	3.025	-1.212
11:56:00	3.03194	-1.026
12:06:00	3.03889	-0.941
12:16:00	3.04583	-0.942
12:26:00	3.05278	-1.972
12:36:00	3.05972	-1.956
12:46:00	3.06667	-1.744
12:56:00	3.07361	-1.286
13:06:00	3.08056	-1.935
13:16:00	3.0875	-1.328
13:26:00	3.09444	-0.962
13:36:00	3.10139	-0.423
13:46:00	3.10833	1.326
13:56:00	3.11528	-1.171
14:06:00	3.12222	-0.866
14:16:00	3.12917	-0.52
14:26:00	3.13611	-0.847
14:36:00	3.14306	-0.353
14:46:00	3.15	0.29
14:56:00	3.15694	-0.894
15:06:00	3.16389	-1.518
15:16:00	3.17083	-1.183
15:26:00	3.17778	-0.732
15:36:00	3.18472	-1.456
15:46:00	3.19167	-0.022
15:56:00	3.19861	0.064
16:06:00	3.20556	-0.445
16:16:00	3.2125	-0.536
16:26:00	3.21944	-1.05
16:36:00	3.22639	0.027
16:46:00	3.23333	2.299
16:56:00	3.24028	1.367
17:06:00	3.24722	-0.242
17:16:00	3.25417	0.943
17:26:00	3.26111	0.144
17:36:00	3.26806	-0.93
17:46:00	3.275	1.647
17:56:00	3.28194	1.468
18:06:00	3.28889	0.575
18:16:00	3.29583	0.611
18:26:00	3.30278	0.188
18:36:00	3.30972	0.149
18:46:00	3.31667	0.502
18:56:00	3.32361	1.873
19:06:00	3.33056	1.688
19:16:00	3.3375	-0.041
19:26:00	3.34444	1.415
19:36:00	3.35139	1.031
19:46:00	3.35833	1.199
19:56:00	3.36528	1.618
20:06:00	3.37222	-0.277
20:16:00	3.37917	0.201
20:26:00	3.38611	1.056
20:36:00	3.39306	2.096
20:46:00	3.4	1.833
20:56:00	3.40694	1.041
21:06:00	3.41389	0.533
21:16:00	3.42083	0.037
21:26:00	3.42778	3.257
21:36:00	3.43472	1.452
21:46:00	3.44167	2.586
21:56:00	3.44861	2.131
22:06:00	3.45556	1.302
22:16:00	3.4625	0.8
22:26:00	3.46944	0.188
22:36:00	3.47639	1.372
22:46:00	3.48333	2.196
22:56:00	3.49028	1.64
23:06:00	3.49722	2.015
23:16:00	3.50417	0.939
23:26:00	3.51111	1.668
23:36:00	3.51806	1.111
23:46:00	3.525	1.275
23:56:00	3.53194	1.79
00:06:00	3.53889	0.912
00:16:00	3.54583	-0.156
00:26:00	3.55278	-0.178
00:36:00	3.55972	0.855
00:46:00	3.56667	2.637
00:56:00	3.57361	1.29
01:06:00	3.58056	1.109
01:16:00	3.5875	1.794
01:26:00	3.59444	0.684
01:36:00	3.60139	1.754
01:46:00	3.60833	0.691
01:56:00	3.61528	0.841
02:06:00	3.62222	-1.391
02:16:00	3.62917	0.728
02:26:00	3.63611	-0.484
02:36:00	3.64306	-1.877
02:46:00	3.65	0.158
02:56:00	3.65694	0.623
03:06:00	3.66389	-1.076
03:16:00	3.67083	0.185
03:26:00	3.67778	-0.89
03:36:00	3.68472	0.073
03:46:00	3.69167	-1.042
03:56:00	3.69861	0.332
04:06:00	3.70556	-0.356
04:16:00	3.7125	1.005
04:26:00	3.71944	-0.11
04:36:00	3.72639	-2.443
04:46:00	3.73333	-0.82
04:56:00	3.74028	-0.346
05:06:00	3.74722	0.998
05:16:00	3.75417	-0.611
05:26:00	3.76111	0.379
05:36:00	3.76806	-1.868
05:46:00	3.775	-1.086
05:56:00	3.78194	-2.475
06:06:00	3.78889	-2.935
06:16:00	3.79583	-1.577
06:26:00	3.80278	-2.901
06:36:00	3.80972	-2.457
06:46:00	3.81667	-1.04
06:56:00	3.82361	-2.801
07:06:00	3.83056	-2.742
07:16:00	3.8375	-2.327
07:26:00	3.84444	-1.757
07:36:00	3.85139	-1.757
07:46:00	3.85833	-1.713
07:56:00	3.86528	-1.247
08:06:00	3.87222	-2.083
08:16:00	3.87917	-1.889
08:26:00	3.88611	-1.272
08:36:00	3.89306	-2.455
08:46:00	3.9	0.09
08:56:00	3.90694	-0.524
09:06:00	3.91389	-2.293
09:16:00	3.92083	-2.419
09:26:00	3.92778	-0.029
09:36:00	3.93472	-2.688
09:46:00	3.94167	0.014
09:56:00	3.94861	-1.692
10:06:00	3.95556	-0.662
10:16:00	3.9625	-0.643
10:26:00	3.96944	-2.43
10:36:00	3.97639	-0.142
10:46:00	3.98333	-2.129
10:56:00	3.99028	-1.13
11:06:00	3.99722	-1.3
11:16:00	4.00417	-1.676
11:26:00	4.01111	-1.113
11:36:00	4.01806	-1.267
11:46:00	4.025	-0.754
11:56:00	4.03194	-1.081
12:06:00	4.03889	-1.073
12:16:00	4.04583	-0.887
12:26:00	4.05278	-1.879
12:36:00	4.05972	-3.411
12:46:00	4.06667	-1.772
12:56:00	4.07361	-2.459
13:06:00	4.08056	-1.428
13:16:00	4.0875	-0.367
13:26:00	4.09444	-1.016
13:36:00	4.10139	-1.208
13:46:00	4.10833	-0.572
13:56:00	4.11528	-1.049
14:06:00	4.12222	0.366
14:16:00	4.12917	-0.315
14:26:00	4.13611	-0.173
14:36:00	4.14306	-0.096
14:46:00	4.15	2.42
14:56:00	4.15694	-0.901
15:06:00	4.16389	-0.012
15:16:00	4.17083	1.064
15:26:00	4.17778	-0.862
15:36:00	4.18472	-0.037
15:46:00	4.19167	-1.056
15:56:00	4.19861	-1.256
16:06:00	4.20556	-0.926
16:16:00	4.2125	0.223
16:26:00	4.21944	0.521
16:36:00	4.22639	1.558
16:46:00	4.23333	-1.699
16:56:00	4.24028	0.253
17:06:00	4.24722	0.036
17:16:00	4.25417	0.659
17:26:00	4.26111	0.103
17:36:00	4.26806	-0.859
17:46:00	4.275	1.337
17:56:00	4.28194	-0.802
18:06:00	4.28889	0.044
18:16:00	4.29583	0.424
18:26:00	4.30278	2.282
18:36:00	4.30972	0.518
18:46:00	4.31667	0.294
18:56:00	4.32361	1.339
19:06:00	4.33056	0.55
19:16:00	4.3375	1.637
19:26:00	4.34444	-0.12
19:36:00	4.35139	2.513
19:46:00	4.35833	2.168
19:56:00	4.36528	-0.265
20:06:00	4.37222	1.178
20:16:00	4.37917	0.62
20:26:00	4.38611	0.39
20:36:00	4.39306	1.019
20:46:00	4.4	0.533
20:56:00	4.40694	0.702
21:06:00	4.41389	1.567
21:16:00	4.42083	0.474
21:26:00	4.42778	-0.266
21:36:00	4.43472	-0.229
21:46:00	4.44167	-0.748
21:56:00	4.44861	2.651
22:06:00	4.45556	-0.73
22:16:00	4.4625	-0.227
22:26:00	4.46944	0.45
22:36:00	4.47639	0.202
22:46:00	4.48333	2.216
22:56:00	4.49028	0.025
23:06:00	4.49722	0.768
23:16:00	4.50417	0.396
23:26:00	4.51111	1.699
23:36:00	4.51806	2.384
23:46:00	4.525	2.512
23:56:00	4.53194	2.234
00:06:00	4.53889	0.679
00:16:00	4.54583	0.77
00:26:00	4.55278	-0.065
00:36:00	4.55972	1.144
00:46:00	4.56667	0.691
00:56:00	4.57361	1.929
01:06:00	4.58056	0.862
01:16:00	4.5875	3.05
01:26:00	4.59444	2.363
01:36:00	4.60139	0.761
01:46:00	4.60833	1.433
01:56:00	4.61528	-1.061
02:06:00	4.62222	2.674
02:16:00	4.62917	3.029
02:26:00	4.63611	0.593
02:36:00	4.64306	0.933
02:46:00	4.65	1.31
02:56:00	4.65694	1.825
03:06:00	4.66389	0.671
03:16:00	4.67083	2.559
03:26:00	4.67778	0.962
03:36:00	4.68472	2.283
03:46:00	4.69167	-0.294
03:56:00	4.69861	0.624
04:06:00	4.70556	1.012
04:16:00	4.7125	-0.096
04:26:00	4.71944	-0.702
04:36:00	4.72639	1.141
04:46:00	4.73333	0.482
04:56:00	4.74028	0.126
05:06:00	4.74722	0.097
05:16:00	4.75417	-0.922
05:26:00	4.76111	0.099
05:36:00	4.76806	0.309
05:46:00	4.775	0.214
05:56:00	4.78194	-0.464
06:06:00	4.78889	-1.211
06:16:00	4.79583	0.613
06:26:00	4.80278	-0.441
06:36:00	4.80972	0.44
06:46:00	4.81667	0.36
06:56:00	4.82361	0.409
07:06:00	4.83056	0.615
07:16:00	4.8375	-0.37
07:26:00	4.84444	0.809
07:36:00	4.85139	0.061
07:46:00	4.85833	-0.032
07:56:00	4.86528	-0.391
08:06:00	4.87222	-0.301
08:16:00	4.87917	-0.716
08:26:00	4.88611	-0.601
08:36:00	4.89306	-0.7
08:46:00	4.9	-1.569
08:56:00	4.90694	-0.209
09:06:00	4.91389	-0.41
09:16:00	4.92083	0.955
09:26:00	4.92778	-0.379
09:36:00	4.93472	-0.399
09:46:00	4.94167	-1.848
09:56:00	4.94861	0.683
10:06:00	4.95556	-1.702
10:16:00	4.9625	-1.295
10:26:00	4.96944	-1.513
10:36:00	4.97639	0.588
10:46:00	4.98333	0.206
10:56:00	4.99028	-2.086
11:06:00	4.99722	0.363
11:16:00	5.00417	-0.201
11:26:00	5.01111	-2.56
11:36:00	5.01806	-0.959
11:46:00	5.025	0.569
11:56:00	5.03194	-0.595
12:06:00	5.03889	-1.392
12:16:00	5.04583	-0.065
12:26:00	5.05278	-1.423
12:36:00	5.05972	0.384
12:46:00	5.06667	1.895
12:56:00	5.07361	-1.539
13:06:00	5.08056	-0.036
13:16:00	5.0875	-2.288
13:26:00	5.09444	0.89
13:36:00	5.10139	-0.667
13:46:00	5.10833	0.285
13:56:00	5.11528	-1.177
14:06:00	5.12222	-0.344
14:16:00	5.12917	-0.616
14:26:00	5.13611	-0.421
14:36:00	5.14306	0.774
14:46:00	5.15	-1.133
14:56:00	5.15694	-0.465
15:06:00	5.16389	0.132
15:16:00	5.17083	-0.308
15:26:00	5.17778	-0.098
15:36:00	5.18472	-0.483
15:46:00	5.19167	0.308
15:56:00	5.19861	-1.675
16:06:00	5.20556	0.772
16:16:00	5.2125	-0.454
16:26:00	5.21944	0.058
16:36:00	5.22639	0.836
16:46:00	5.23333	0.187
16:56:00	5.24028	0.505
17:06:00	5.24722	-1.006
17:16:00	5.25417	-1.539
17:26:00	5.26111	0.772
17:36:00	5.26806	-0.511
17:46:00	5.275	-0.759
17:56:00	5.28194	1.546
18:06:00	5.28889	0.154
18:16:00	5.29583	1.174
18:26:00	5.30278	-0.076
18:36:00	5.30972	0.307
18:46:00	5.31667	-0.495
18:56:00	5.32361	-0.228
19:06:00	5.33056	-0.488
19:16:00	5.3375	-0.277
19:26:00	5.34444	1.854
19:36:00	5.35139	2.178
19:46:00	5.35833	1.548
19:56:00	5.36528	1.543
20:06:00	5.37222	0.295
20:16:00	5.37917	0.289
20:26:00	5.38611	0.672
20:36:00	5.39306	0.89
20:46:00	5.4	-0.342
20:56:00	5.40694	-1.188
21:06:00	5.41389	0.9
21:16:00	5.42083	0.212
21:26:00	5.42778	1.292
21:36:00	5.43472	-0.658
21:46:00	5.44167	-0.454
21:56:00	5.44861	-1.747
22:06:00	5.45556	-1.059
22:16:00	5.4625	-0.74
22:26:00	5.46944	-0.206
22:36:00	5.47639	-1.024
22:46:00	5.48333	0.663
22:56:00	5.49028	0.497
23:06:00	5.49722	0.167
23:16:00	5.50417	1.27
23:26:00	5.51111	0.928
23:36:00	5.51806	-0.186
23:46:00	5.525	-0.698
23:56:00	5.53194	-0.271
00:06:00	5.53889	2.128
00:16:00	5.54583	1.237
00:26:00	5.55278	0.965
00:36:00	5.55972	-1.336
00:46:00	5.56667	3.35
00:56:00	5.57361	-0.337
01:06:00	5.58056	0.543
01:16:00	5.5875	-0.309
01:26:00	5.59444	0.14
01:36:00	5.60139	0.065
01:46:00	5.60833	-1.87
01:56:00	5.61528	-1.75
02:06:00	5.62222	0.536
02:16:00	5.62917	1.096
02:26:00	5.63611	0.573
02:36:00	5.64306	0.116
02:46:00	5.65	-0.377
02:56:00	5.65694	-0.392
03:06:00	5.66389	-1.547
03:16:00	5.67083	-0.481
03:26:00	5.67778	0.309
03:36:00	5.68472	2.287
03:46:00	5.69167	0.618
03:56:00	5.69861	0.215
04:06:00	5.70556	0.225
04:16:00	5.7125	-0.3
04:26:00	5.71944	-0.427
04:36:00	5.72639	-0.565
04:46:00	5.73333	-0.34
04:56:00	5.74028	0.466
05:06:00	5.74722	0.133
05:16:00	5.75417	0.456
05:26:00	5.76111	0.651
05:36:00	5.76806	-0.602
05:46:00	5.775	-0.06
05:56:00	5.78194	1.942
06:06:00	5.78889	-1.208
06:16:00	5.79583	-0.408
06:26:00	5.80278	0.24
06:36:00	5.80972	-0.593
06:46:00	5.81667	-0.089
06:56:00	5.82361	-0.483
07:06:00	5.83056	-0.522
07:16:00	5.8375	-0.617
07:26:00	5.84444	-1.514
07:36:00	5.85139	1.919
07:46:00	5.85833	0.556
07:56:00	5.86528	0.197
08:06:00	5.87222	-1.716
08:16:00	5.87917	0.579
08:26:00	5.88611	-0.177
08:36:00	5.89306	-2.418
08:46:00	5.9	0.369
08:56:00	5.90694	-0.729
09:06:00	5.91389	-0.309
09:16:00	5.92083	0.782
09:26:00	5.92778	0.866
09:36:00	5.93472	0.128
09:46:00	5.94167	-0.696
09:56:00	5.94861	-0.451
10:06:00	5.95556	1.346
10:16:00	5.9625	-1.187
10:26:00	5.96944	0.191
10:36:00	5.97639	-0.967
10:46:00	5.98333	-0.865
10:56:00	5.99028	-0.19
11:06:00	5.99722	-0.456
11:16:00	6.00417	0.364
11:26:00	6.01111	-0.09
11:36:00	6.01806	-0.985
11:46:00	6.025	-0.727
11:56:00	6.03194	-0.527
12:06:00	6.03889	-1.693
12:16:00	6.04583	-1.825
12:26:00	6.05278	-0.603
12:36:00	6.05972	1.813
12:46:00	6.06667	0.44
12:56:00	6.07361	-0.547
13:06:00	6.08056	-2.83
13:16:00	6.0875	0.411
13:26:00	6.09444	0.146
13:36:00	6.10139	-0.679
13:46:00	6.10833	0.329
13:56:00	6.11528	-0.917
14:06:00	6.12222	-2.282
14:16:00	6.12917	-0.753
14:26:00	6.13611	0.24
14:36:00	6.14306	-1.493
14:46:00	6.15	-0.01
14:56:00	6.15694	-2.094
15:06:00	6.16389	-0.19
15:16:00	6.17083	-0.197
15:26:00	6.17778	-1.293
15:36:00	6.18472	-2.089
15:46:00	6.19167	-0.798
15:56:00	6.19861	1.41
16:06:00	6.20556	-1.118
16:16:00	6.2125	-0.029
16:26:00	6.21944	0.121
16:36:00	6.22639	-0.585
16:46:00	6.23333	2.77
16:56:00	6.24028	-1.578
17:06:00	6.24722	1.189
17:16:00	6.25417	-0.36
17:26:00	6.26111	0.015
17:36:00	6.26806	1.816
17:46:00	6.275	0.435
17:56:00	6.28194	0.83
18:06:00	6.28889	-0.902
18:16:00	6.29583	-0.752
18:26:00	6.30278	-0.939
18:36:00	6.30972	1.292
18:46:00	6.31667	0.218
18:56:00	6.32361	-0.382
19:06:00	6.33056	0.254
19:16:00	6.3375	0.787
19:26:00	6.34444	0.905
19:36:00	6.35139	-0.45
19:46:00	6.35833	-0.885
19:56:00	6.36528	-2.138
20:06:00	6.37222	0.942
20:16:00	6.37917	0.285
20:26:00	6.38611	-0.106
20:36:00	6.39306	-0.689
20:46:00	6.4	0.428
20:56:00	6.40694	-0.34
21:06:00	6.41389	0.704
21:16:00	6.42083	0.076
21:26:00	6.42778	-0.425
21:36:00	6.43472	0.695
21:46:00	6.44167	1.181
21:56:00	6.44861	1.085
22:06:00	6.45556	-0.017
22:16:00	6.4625	-0.251
22:26:00	6.46944	0.461
22:36:00	6.47639	0.306
22:46:00	6.48333	0.077
22:56:00	6.49028	-0.013
23:06:00	6.49722	1.612
23:16:00	6.50417	0.497
23:26:00	6.51111	0.352
23:36:00	6.51806	0.516
23:46:00	6.525	0.615
23:56:00	6.53194	-1.364
00:06:00	6.53889	0.88
00:16:00	6.54583	1.424
00:26:00	6.55278	-1.136
00:36:00	6.55972	0.31
00:46:00	6.56667	1.452
00:56:00	6.57361	0.169
01:06:00	6.58056	0.33
01:16:00	6.5875	0.335
01:26:00	6.59444	0.997
01:36:00	6.60139	0.514
01:46:00	6.60833	-1.576
01:56:00	6.61528	-1.005
02:06:00	6.62222	1.172
02:16:00	6.62917	2.262
02:26:00	6.63611	1.676
02:36:00	6.64306	1.123
02:46:00	6.65	-0.513
02:56:00	6.65694	-0.198
03:06:00	6.66389	-0.189
03:16:00	6.67083	0.456
03:26:00	6.67778	1.169
03:36:00	6.68472	-2.996
03:46:00	6.69167	-1.543
03:56:00	6.69861	0.689
04:06:00	6.70556	-1.376
04:16:00	6.7125	-0.198
04:26:00	6.71944	1.531
04:36:00	6.72639	-1.09
04:46:00	6.73333	1.193
04:56:00	6.74028	-0.462
05:06:00	6.74722	0.152
05:16:00	6.75417	0.946
05:26:00	6.76111	1.968
05:36:00	6.76806	0.873
05:46:00	6.775	-0.044
05:56:00	6.78194	-1.071
06:06:00	6.78889	0.293
06:16:00	6.79583	-0.799
06:26:00	6.80278	0.061
06:36:00	6.80972	2.15
06:46:00	6.81667	-0.3
06:56:00	6.82361	0.318
07:06:00	6.83056	-0.349
07:16:00	6.8375	-0.87
07:26:00	6.84444	0.763
07:36:00	6.85139	-0.04
07:46:00	6.85833	1.456
07:56:00	6.86528	-0.406
08:06:00	6.87222	-0.393
08:16:00	6.87917	-0.045
08:26:00	6.88611	-1.333
08:36:00	6.89306	0.719
08:46:00	6.9	-0.203
08:56:00	6.90694	1.456
09:06:00	6.91389	0.551
09:16:00	6.92083	0.892
09:26:00	6.92778	-0.261
09:36:00	6.93472	1.019
09:46:00	6.94167	-0.554
09:56:00	6.94861	1.031
10:06:00	6.95556	-1.151
10:16:00	6.9625	-1.987
10:26:00	6.96944	-0.215
10:36:00	6.97639	0.851
10:46:00	6.98333	-2.228
10:56:00	6.99028	0.679
11:06:00	6.99722	2.253
11:16:00	7.00417	0.919
11:26:00	7.01111	2.029
11:36:00	7.01806	-0.855
11:46:00	7.025	2.031
11:56:00	7.03194	1.444
12:06:00	7.03889	-0.182
12:16:00	7.04583	-0.381
12:26:00	7.05278	-0.562
12:36:00	7.05972	0.287
12:46:00	7.06667	-0.568
12:56:00	7.07361	-1.354
13:06:00	7.08056	0.58
13:16:00	7.0875	2.857
13:26:00	7.09444	0.272
13:36:00	7.10139	-1.686
13:46:00	7.10833	0.045
13:56:00	7.11528	-1.996
14:06:00	7.12222	-0.074
14:16:00	7.12917	1.175
14:26:00	7.13611	-0.492
14:36:00	7.14306	1.69
14:46:00	7.15	-0.46
