# Supplementary material for: The nutrient-sensing GCN2 signaling pathway is essential for circadian clock function by regulating histone acetylation under amino acid starvation
Source: eLife journal article supplement (doi:10.7554/elife.85241), 2023-04-21
Supplement: fig1-data3 [file Figure 1-source data 3-8.xlsx]

## Sheet: frq rhythm+3mM 3-AT
Hrs in DD	WT	WT	WT	cpc-3ko	cpc-3ko	cpc-3ko	cpc-1ko	cpc-1ko	cpc-1ko
0	1	1	1	1.1316	0.961013	1.26457	1.18551	1.13238	1.27314
4	0.135557	0.147113	0.170417	0.121779	0.066806	0.223777	0.132585	0.203894	0.144796
8	0.14237	0.107152	0.112414	0.188838	0.097253	0.179862	0.185577	0.24543	0.320685
12	0.217848	0.227026	0.288694	0.184211	0.16617	0.272486	0.207732	0.216544	0.293902
16	0.732374	0.749301	0.91609	0.268477	0.293659	0.52689	0.176859	0.244509	0.38282
20	0.482012	0.545873	0.587677	0.294796	0.361067	0.135246	0.176859	0.244509	0.38282
24	0.216123	0.270111	0.17704	0.216693	0.205723	0.0898404	0.193645	0.343586	0.122114
28	0.169293	0.231915	0.163918	0.190629	0.14843	0.18508	0.359598	0.324129	0.2193
32	0.179636	0.30435	0.142412	0.171754	0.27476	0.099101	0.365724	0.345042	0.360315
36	0.433381	0.43768	0.441233	0.224145	0.0749817	0.231545	0.473666	0.496214	0.370853
40	0.477743	0.485997	0.43598	0.342661	0.425434	0.394006	0.363762	0.447303	0.351264
44	0.417686	0.408533	0.410796	0.479715	0.404045	0.319759	0.439681	0.537742	0.387166
48	0.197873	0.363942	0.270498	0.405848	0.294732	0.321797	0.335797	0.499723	0.316413
