# Supplementary material for: The nutrient-sensing GCN2 signaling pathway is essential for circadian clock function by regulating histone acetylation under amino acid starvation
Source: eLife journal article supplement (doi:10.7554/elife.85241), 2023-04-21
Supplement: fig1-figsupp2-data1 [file Figure 1-figure supplement 2-source data.xlsx]

## Sheet: WT-raw data
LumiCycle: WT-frq.luc (Raw)
Time (hr:min)	Time (days)	counts/sec
12:31:00	0.52153	169.91
12:41:00	0.52847	185.173
12:51:00	0.53542	190.301
13:01:00	0.54236	211.013
13:11:00	0.54931	229.169
13:21:00	0.55625	229.569
13:31:00	0.56319	242.619
13:41:00	0.57014	230.227
13:51:00	0.57708	244.001
14:01:00	0.58403	230.51
14:11:00	0.59097	237.795
14:21:00	0.59792	234.574
14:31:00	0.60486	244.209
14:41:00	0.61181	239.649
14:51:00	0.61875	227.734
15:01:00	0.62569	235.13
15:11:00	0.63264	234.676
15:21:00	0.63958	222.891
15:31:00	0.64653	223.617
15:41:00	0.65347	214.649
15:51:00	0.66042	205.959
16:01:00	0.66736	209.381
16:11:00	0.67431	204.512
16:21:00	0.68125	204.207
16:31:00	0.68819	198.649
16:41:00	0.69514	195.615
16:51:00	0.70208	191.725
17:01:00	0.70903	181.153
17:11:00	0.71597	182.091
17:21:00	0.72292	174.871
17:31:00	0.72986	174.735
17:41:00	0.73681	169.657
17:51:00	0.74375	168.209
18:01:00	0.75069	161.057
18:11:00	0.75764	161.709
18:21:00	0.76458	156.069
18:31:00	0.77153	156.876
18:41:00	0.77847	152.142
18:51:00	0.78542	151.218
19:01:00	0.79236	149.517
19:11:00	0.79931	145.295
19:21:00	0.80625	142.96
19:31:00	0.81319	141.02
19:41:00	0.82014	136.886
19:51:00	0.82708	136.049
20:01:00	0.83403	137.943
20:11:00	0.84097	135.468
20:21:00	0.84792	134.093
20:31:00	0.85486	129.25
20:41:00	0.86181	127.441
20:51:00	0.86875	126.283
21:01:00	0.87569	124.433
21:11:00	0.88264	125.029
21:21:00	0.88958	120.969
21:31:00	0.89653	119.441
21:41:00	0.90347	116.809
21:51:00	0.91042	120.43
22:01:00	0.91736	114.752
22:11:00	0.92431	114.953
22:21:00	0.93125	113.819
22:31:00	0.93819	110.794
22:41:00	0.94514	113.17
22:51:00	0.95208	111.687
23:01:00	0.95903	108.45
23:11:00	0.96597	106.156
23:21:00	0.97292	108.122
23:31:00	0.97986	107.773
23:41:00	0.98681	102.334
23:51:00	0.99375	104.705
00:01:00	1.00069	102.835
00:11:00	1.00764	102.655
00:21:00	1.01458	101.104
00:31:00	1.02153	99.522
00:41:00	1.02847	101.635
00:51:00	1.03542	100.009
01:01:00	1.04236	98.558
01:11:00	1.04931	97.944
01:21:00	1.05625	94.254
01:31:00	1.06319	96.16
01:41:00	1.07014	93.637
01:51:00	1.07708	94.429
02:01:00	1.08403	96.649
02:11:00	1.09097	94.836
02:21:00	1.09792	91.871
02:31:00	1.10486	93.58
02:41:00	1.11181	91.975
02:51:00	1.11875	90.728
03:01:00	1.12569	88.56
03:11:00	1.13264	91.144
03:21:00	1.13958	87.864
03:31:00	1.14653	88.362
03:41:00	1.15347	88.209
03:51:00	1.16042	88.452
04:01:00	1.16736	89.186
04:11:00	1.17431	89.151
04:21:00	1.18125	89.279
04:31:00	1.18819	90.225
04:41:00	1.19514	91.21
04:51:00	1.20208	89.371
05:01:00	1.20903	92.427
05:11:00	1.21597	90.779
05:21:00	1.22292	90.91
05:31:00	1.22986	90.589
05:41:00	1.23681	90.934
05:51:00	1.24375	92.644
06:01:00	1.25069	92.78
06:11:00	1.25764	95.781
06:21:00	1.26458	97.942
06:31:00	1.27153	94.978
06:41:00	1.27847	98.943
06:51:00	1.28542	100.193
07:01:00	1.29236	101.483
07:11:00	1.29931	99.905
07:21:00	1.30625	106.1
07:31:00	1.31319	106.613
07:41:00	1.32014	106.484
07:51:00	1.32708	110.978
08:01:00	1.33403	109.136
08:11:00	1.34097	116.282
08:21:00	1.34792	116.744
08:31:00	1.35486	120.171
08:41:00	1.36181	122.352
08:51:00	1.36875	125.446
09:01:00	1.37569	130.611
09:11:00	1.38264	136.969
09:21:00	1.38958	139.445
09:31:00	1.39653	139.179
09:41:00	1.40347	144.459
09:51:00	1.41042	148.104
10:01:00	1.41736	153.018
10:11:00	1.42431	153.966
10:21:00	1.43125	155.713
10:31:00	1.43819	159.726
10:41:00	1.44514	167.03
10:51:00	1.45208	172.831
11:01:00	1.45903	175.372
11:11:00	1.46597	175.608
11:21:00	1.47292	182.848
11:31:00	1.47986	181.85
11:41:00	1.48681	184.843
11:51:00	1.49375	190.716
12:01:00	1.50069	190.253
12:11:00	1.50764	195.492
12:21:00	1.51458	200.548
12:31:00	1.52153	205.868
12:41:00	1.52847	203.185
12:51:00	1.53542	204.495
13:01:00	1.54236	209.889
13:11:00	1.54931	216.128
13:21:00	1.55625	213.191
13:31:00	1.56319	217.796
13:41:00	1.57014	219.446
13:51:00	1.57708	219.796
14:01:00	1.58403	218.942
14:11:00	1.59097	214.325
14:21:00	1.59792	220.71
14:31:00	1.60486	214.325
14:41:00	1.61181	218.283
14:51:00	1.61875	217.24
15:01:00	1.62569	211.703
15:11:00	1.63264	219.847
15:21:00	1.63958	216.639
15:31:00	1.64653	213.253
15:41:00	1.65347	211.581
15:51:00	1.66042	208.974
16:01:00	1.66736	206.815
16:11:00	1.67431	209.69
16:21:00	1.68125	205.016
16:31:00	1.68819	199.154
16:41:00	1.69514	195.072
16:51:00	1.70208	194.855
17:01:00	1.70903	193.736
17:11:00	1.71597	190.795
17:21:00	1.72292	192.351
17:31:00	1.72986	190.108
17:41:00	1.73681	186.315
17:51:00	1.74375	186.306
18:01:00	1.75069	178.808
18:11:00	1.75764	179.764
18:21:00	1.76458	176.066
18:31:00	1.77153	174.916
18:41:00	1.77847	173.037
18:51:00	1.78542	173.12
19:01:00	1.79236	173.668
19:11:00	1.79931	172.718
19:21:00	1.80625	170.765
19:31:00	1.81319	165.692
19:41:00	1.82014	165.347
19:51:00	1.82708	161.345
20:01:00	1.83403	162.122
20:11:00	1.84097	165.873
20:21:00	1.84792	157.168
20:31:00	1.85486	158.329
20:41:00	1.86181	155.56
20:51:00	1.86875	156.525
21:01:00	1.87569	155.858
21:11:00	1.88264	154
21:21:00	1.88958	154.248
21:31:00	1.89653	150.951
21:41:00	1.90347	151.184
21:51:00	1.91042	150.65
22:01:00	1.91736	149.864
22:11:00	1.92431	148.704
22:21:00	1.93125	144.683
22:31:00	1.93819	148.42
22:41:00	1.94514	148.338
22:51:00	1.95208	149.667
23:01:00	1.95903	147.2
23:11:00	1.96597	146.861
23:21:00	1.97292	144.758
23:31:00	1.97986	140.792
23:41:00	1.98681	144.203
23:51:00	1.99375	139.451
00:01:00	2.00069	139.146
00:11:00	2.00764	143.904
00:21:00	2.01458	144.577
00:31:00	2.02153	143.21
00:41:00	2.02847	143.813
00:51:00	2.03542	140.952
01:01:00	2.04236	136.728
01:11:00	2.04931	141.429
01:21:00	2.05625	136.778
01:31:00	2.06319	142.859
01:41:00	2.07014	140.696
01:51:00	2.07708	141.492
02:01:00	2.08403	141.606
02:11:00	2.09097	141.04
02:21:00	2.09792	142.783
02:31:00	2.10486	138.279
02:41:00	2.11181	143.527
02:51:00	2.11875	142.209
03:01:00	2.12569	144.626
03:11:00	2.13264	143.625
03:21:00	2.13958	141.795
03:31:00	2.14653	142.416
03:41:00	2.15347	141.439
03:51:00	2.16042	145.138
04:01:00	2.16736	145.968
04:11:00	2.17431	145.475
04:21:00	2.18125	147.398
04:31:00	2.18819	146.806
04:41:00	2.19514	145.206
04:51:00	2.20208	150.678
05:01:00	2.20903	147.055
05:11:00	2.21597	154.961
05:21:00	2.22292	154.218
05:31:00	2.22986	154.808
05:41:00	2.23681	161.716
05:51:00	2.24375	161.067
06:01:00	2.25069	159.668
06:11:00	2.25764	166.082
06:21:00	2.26458	166.847
06:31:00	2.27153	171.596
06:41:00	2.27847	175.157
06:51:00	2.28542	178.581
07:01:00	2.29236	176.925
07:11:00	2.29931	187.369
07:21:00	2.30625	190.897
07:31:00	2.31319	192.882
07:41:00	2.32014	199.743
07:51:00	2.32708	204.727
08:01:00	2.33403	210.866
08:11:00	2.34097	215.668
08:21:00	2.34792	222.973
08:31:00	2.35486	227.817
08:41:00	2.36181	233.925
08:51:00	2.36875	243.139
09:01:00	2.37569	247.354
09:11:00	2.38264	258.251
09:21:00	2.38958	259.666
09:31:00	2.39653	273.528
09:41:00	2.40347	274.275
09:51:00	2.41042	283.349
10:01:00	2.41736	284.103
10:11:00	2.42431	293.466
10:21:00	2.43125	301.935
10:31:00	2.43819	313.855
10:41:00	2.44514	316.939
10:51:00	2.45208	320.386
11:01:00	2.45903	332.91
11:11:00	2.46597	338.511
11:21:00	2.47292	344.235
11:31:00	2.47986	360.439
11:41:00	2.48681	357.917
11:51:00	2.49375	365.337
12:01:00	2.50069	371.92
12:11:00	2.50764	379.603
12:21:00	2.51458	386.044
12:31:00	2.52153	392.693
12:41:00	2.52847	402.395
12:51:00	2.53542	398.56
13:01:00	2.54236	406.915
13:11:00	2.54931	413.378
13:21:00	2.55625	413.839
13:31:00	2.56319	419.382
13:41:00	2.57014	423.531
13:51:00	2.57708	421.789
14:01:00	2.58403	427.039
14:11:00	2.59097	430.306
14:21:00	2.59792	425.996
14:31:00	2.60486	425.614
14:41:00	2.61181	431.039
14:51:00	2.61875	427.308
15:01:00	2.62569	427.129
15:11:00	2.63264	428.045
15:21:00	2.63958	426.276
15:31:00	2.64653	419.701
15:41:00	2.65347	416.421
15:51:00	2.66042	417.367
16:01:00	2.66736	423.184
16:11:00	2.67431	418.38
16:21:00	2.68125	414.966
16:31:00	2.68819	409.587
16:41:00	2.69514	398.255
16:51:00	2.70208	398.958
17:01:00	2.70903	397.765
17:11:00	2.71597	392.758
17:21:00	2.72292	391.272
17:31:00	2.72986	385.685
17:41:00	2.73681	383.227
17:51:00	2.74375	377.389
18:01:00	2.75069	379.552
18:11:00	2.75764	374.242
18:21:00	2.76458	372.645
18:31:00	2.77153	368.898
18:41:00	2.77847	357.839
18:51:00	2.78542	365.429
19:01:00	2.79236	359.583
19:11:00	2.79931	354.479
19:21:00	2.80625	350.74
19:31:00	2.81319	346.716
19:41:00	2.82014	346.403
19:51:00	2.82708	350.089
20:01:00	2.83403	347.623
20:11:00	2.84097	340.982
20:21:00	2.84792	346.501
20:31:00	2.85486	343.03
20:41:00	2.86181	341.686
20:51:00	2.86875	338.254
21:01:00	2.87569	336.814
21:11:00	2.88264	337.538
21:21:00	2.88958	332.425
21:31:00	2.89653	335.225
21:41:00	2.90347	328.265
21:51:00	2.91042	328.795
22:01:00	2.91736	330.464
22:11:00	2.92431	323.217
22:21:00	2.93125	323.484
22:31:00	2.93819	327.178
22:41:00	2.94514	324.769
22:51:00	2.95208	321.151
23:01:00	2.95903	326.88
23:11:00	2.96597	319.338
23:21:00	2.97292	320.545
23:31:00	2.97986	319.886
23:41:00	2.98681	313.215
23:51:00	2.99375	311.5
00:01:00	3.00069	312.913
00:11:00	3.00764	309.518
00:21:00	3.01458	312.97
00:31:00	3.02153	309.084
00:41:00	3.02847	313.247
00:51:00	3.03542	310.767
01:01:00	3.04236	313.902
01:11:00	3.04931	305.102
01:21:00	3.05625	304.215
01:31:00	3.06319	313.354
01:41:00	3.07014	310.553
01:51:00	3.07708	323.475
02:01:00	3.08403	305.906
02:11:00	3.09097	303.621
02:21:00	3.09792	302.049
02:31:00	3.10486	304.477
02:41:00	3.11181	303.572
02:51:00	3.11875	306.255
03:01:00	3.12569	308.278
03:11:00	3.13264	306.651
03:21:00	3.13958	304.755
03:31:00	3.14653	312.709
03:41:00	3.15347	310.353
03:51:00	3.16042	312.457
04:01:00	3.16736	308.243
04:11:00	3.17431	313.192
04:21:00	3.18125	319.784
04:31:00	3.18819	310.674
04:41:00	3.19514	317.83
04:51:00	3.20208	317.912
05:01:00	3.20903	321.012
05:11:00	3.21597	328.286
05:21:00	3.22292	349.576
05:31:00	3.22986	319.589
05:41:00	3.23681	333.68
05:51:00	3.24375	330.226
06:01:00	3.25069	340.024
06:11:00	3.25764	359.322
06:21:00	3.26458	358.293
06:31:00	3.27153	357.505
06:41:00	3.27847	363.015
06:51:00	3.28542	359.226
07:01:00	3.29236	375.101
07:11:00	3.29931	393.046
07:21:00	3.30625	384.448
07:31:00	3.31319	400.167
07:41:00	3.32014	405.391
07:51:00	3.32708	414.26
08:01:00	3.33403	426.487
08:11:00	3.34097	431.167
08:21:00	3.34792	457.624
08:31:00	3.35486	448.587
08:41:00	3.36181	460.265
08:51:00	3.36875	472.017
09:01:00	3.37569	480.875
09:11:00	3.38264	519.615
09:21:00	3.38958	495.554
09:31:00	3.39653	515.129
09:41:00	3.40347	529.55
09:51:00	3.41042	539.815
10:01:00	3.41736	589.059
10:11:00	3.42431	560.788
10:21:00	3.43125	580.403
10:31:00	3.43819	597.443
10:41:00	3.44514	599.25
10:51:00	3.45208	646.233
11:01:00	3.45903	635.081
11:11:00	3.46597	633.999
11:21:00	3.47292	658.857
11:31:00	3.47986	668.5
11:41:00	3.48681	704.411
11:51:00	3.49375	688.952
12:01:00	3.50069	697.53
12:11:00	3.50764	707.941
12:21:00	3.51458	722.823
12:31:00	3.52153	732.896
12:41:00	3.52847	761.827
12:51:00	3.53542	755.058
13:01:00	3.54236	768.165
13:11:00	3.54931	769.163
13:21:00	3.55625	785.731
13:31:00	3.56319	794.61
13:41:00	3.57014	788.619
13:51:00	3.57708	800.392
14:01:00	3.58403	812.607
14:11:00	3.59097	812.226
14:21:00	3.59792	813.35
14:31:00	3.60486	828.834
14:41:00	3.61181	811.457
14:51:00	3.61875	825.907
15:01:00	3.62569	828.318
15:11:00	3.63264	816.562
15:21:00	3.63958	829.137
15:31:00	3.64653	824.271
15:41:00	3.65347	819.902
15:51:00	3.66042	829.266
16:01:00	3.66736	830.12
16:11:00	3.67431	821.662
16:21:00	3.68125	826.395
16:31:00	3.68819	816.185
16:41:00	3.69514	815.477
16:51:00	3.70208	821.355
17:01:00	3.70903	808.985
17:11:00	3.71597	801.196
17:21:00	3.72292	800.603
17:31:00	3.72986	802.275
17:41:00	3.73681	794.661
17:51:00	3.74375	796.384
18:01:00	3.75069	781.664
18:11:00	3.75764	778.408
18:21:00	3.76458	774.468
18:31:00	3.77153	767.412
18:41:00	3.77847	786.967
18:51:00	3.78542	771.176
19:01:00	3.79236	775.811
19:11:00	3.79931	761.445
19:21:00	3.80625	764.73
19:31:00	3.81319	767.78
19:41:00	3.82014	750.578
19:51:00	3.82708	755.54
20:01:00	3.83403	747.795
20:11:00	3.84097	751.544
20:21:00	3.84792	736.254
20:31:00	3.85486	735.522
20:41:00	3.86181	735.02
20:51:00	3.86875	733.507
21:01:00	3.87569	732.086
21:11:00	3.88264	728.852
21:21:00	3.88958	728.83
21:31:00	3.89653	723.865
21:41:00	3.90347	718.874
21:51:00	3.91042	711.163
22:01:00	3.91736	712.357
22:11:00	3.92431	705.754
22:21:00	3.93125	700.508
22:31:00	3.93819	696.184
22:41:00	3.94514	695.365
22:51:00	3.95208	696.365
23:01:00	3.95903	679.241
23:11:00	3.96597	680.397
23:21:00	3.97292	679.198
23:31:00	3.97986	674.568
23:41:00	3.98681	677.002
23:51:00	3.99375	670.866
00:01:00	4.00069	670.807
00:11:00	4.00764	669.966
00:21:00	4.01458	663.14
00:31:00	4.02153	661.51
00:41:00	4.02847	658.181
00:51:00	4.03542	656.48
01:01:00	4.04236	645.698
01:11:00	4.04931	653.193
01:21:00	4.05625	654.329
01:31:00	4.06319	647.217
01:41:00	4.07014	643.628
01:51:00	4.07708	639.386
02:01:00	4.08403	640.59
02:11:00	4.09097	634.672
02:21:00	4.09792	639.229
02:31:00	4.10486	636.752
02:41:00	4.11181	626.076
02:51:00	4.11875	632.798
03:01:00	4.12569	629.065
03:11:00	4.13264	630.971
03:21:00	4.13958	632.061
03:31:00	4.14653	634.055
03:41:00	4.15347	634.322
03:51:00	4.16042	631.893
04:01:00	4.16736	636.967
04:11:00	4.17431	630.469
04:21:00	4.18125	648.163
04:31:00	4.18819	639.814
04:41:00	4.19514	644.062
04:51:00	4.20208	650.797
05:01:00	4.20903	653.817
05:11:00	4.21597	658.693
05:21:00	4.22292	658.992
05:31:00	4.22986	660.848
05:41:00	4.23681	670.236
05:51:00	4.24375	673.8
06:01:00	4.25069	687.193
06:11:00	4.25764	686.733
06:21:00	4.26458	700.387
06:31:00	4.27153	706.814
06:41:00	4.27847	732.416
06:51:00	4.28542	725.906
07:01:00	4.29236	734.494
07:11:00	4.29931	751.18
07:21:00	4.30625	765.715
07:31:00	4.31319	785.012
07:41:00	4.32014	795.24
07:51:00	4.32708	816.153
08:01:00	4.33403	821.971
08:11:00	4.34097	845.343
08:21:00	4.34792	856.957
08:31:00	4.35486	881.769
08:41:00	4.36181	884.282
08:51:00	4.36875	908.444
09:01:00	4.37569	927.946
09:11:00	4.38264	954.419
09:21:00	4.38958	963.061
09:31:00	4.39653	1000.07
09:41:00	4.40347	1010.14
09:51:00	4.41042	1025.1
10:01:00	4.41736	1051.09
10:11:00	4.42431	1073.86
10:21:00	4.43125	1092.59
10:31:00	4.43819	1121.93
10:41:00	4.44514	1137.1
10:51:00	4.45208	1153.34
11:01:00	4.45903	1168.13
11:11:00	4.46597	1194.55
11:21:00	4.47292	1221.33
11:31:00	4.47986	1234.39
11:41:00	4.48681	1263.09
11:51:00	4.49375	1269.69
12:01:00	4.50069	1295.08
12:11:00	4.50764	1318.07
12:21:00	4.51458	1351.64
12:31:00	4.52153	1346.7
12:41:00	4.52847	1374.17
12:51:00	4.53542	1387.06
13:01:00	4.54236	1398.16
13:11:00	4.54931	1417.59
13:21:00	4.55625	1448.96
13:31:00	4.56319	1456.16
13:41:00	4.57014	1465.84
13:51:00	4.57708	1461.66
14:01:00	4.58403	1485.43
14:11:00	4.59097	1501.84
14:21:00	4.59792	1488.06
14:31:00	4.60486	1489.97
14:41:00	4.61181	1498.48
14:51:00	4.61875	1504.88
15:01:00	4.62569	1494.51
15:11:00	4.63264	1510.41
15:21:00	4.63958	1499
15:31:00	4.64653	1512.56
15:41:00	4.65347	1492.52
15:51:00	4.66042	1502.83
16:01:00	4.66736	1463.73
16:11:00	4.67431	1481.11
16:21:00	4.68125	1448.68
16:31:00	4.68819	1458.63
16:41:00	4.69514	1457.03
16:51:00	4.70208	1455.57
17:01:00	4.70903	1445.89
17:11:00	4.71597	1431.62
17:21:00	4.72292	1418.36
17:31:00	4.72986	1412.32
17:41:00	4.73681	1409.88
17:51:00	4.74375	1384.56
18:01:00	4.75069	1392
18:11:00	4.75764	1360.38
18:21:00	4.76458	1355.68
18:31:00	4.77153	1334.32
18:41:00	4.77847	1329.63
18:51:00	4.78542	1308.09
19:01:00	4.79236	1308.77
19:11:00	4.79931	1281.94
19:21:00	4.80625	1293.04
19:31:00	4.81319	1255.92
19:41:00	4.82014	1268.65
19:51:00	4.82708	1232.74
20:01:00	4.83403	1249.63
20:11:00	4.84097	1219.74
20:21:00	4.84792	1215.48
20:31:00	4.85486	1185.63
20:41:00	4.86181	1197.75
20:51:00	4.86875	1166.61
21:01:00	4.87569	1181.47
21:11:00	4.88264	1154.6
21:21:00	4.88958	1151.79
21:31:00	4.89653	1127.71
21:41:00	4.90347	1120.67
21:51:00	4.91042	1106.7
22:01:00	4.91736	1102.79
22:11:00	4.92431	1087.22
22:21:00	4.93125	1078.44
22:31:00	4.93819	1078.43
22:41:00	4.94514	1059.16
22:51:00	4.95208	1047.96
23:01:00	4.95903	1046.37
23:11:00	4.96597	1029.77
23:21:00	4.97292	1030.78
23:31:00	4.97986	1006.53
23:41:00	4.98681	1003.49
23:51:00	4.99375	1004.33
00:01:00	5.00069	981.889
00:11:00	5.00764	988.857
00:21:00	5.01458	968.537
00:31:00	5.02153	955.094
00:41:00	5.02847	953.278
00:51:00	5.03542	952.375
01:01:00	5.04236	932.235
01:11:00	5.04931	939.049
01:21:00	5.05625	926.739
01:31:00	5.06319	914.522
01:41:00	5.07014	918.155
01:51:00	5.07708	895.757
02:01:00	5.08403	898.941
02:11:00	5.09097	883.607
02:21:00	5.09792	888.663
02:31:00	5.10486	881.214
02:41:00	5.11181	880.527
02:51:00	5.11875	868.736
03:01:00	5.12569	864.584
03:11:00	5.13264	859.544
03:21:00	5.13958	861.815
03:31:00	5.14653	860.88
03:41:00	5.15347	843.306
03:51:00	5.16042	841.719
04:01:00	5.16736	842.041
04:11:00	5.17431	836.689
04:21:00	5.18125	848.209
04:31:00	5.18819	838.332
04:41:00	5.19514	840.379
04:51:00	5.20208	831.056
05:01:00	5.20903	833.706
05:11:00	5.21597	848.252
05:21:00	5.22292	841.246
05:31:00	5.22986	844.047
05:41:00	5.23681	846.729
05:51:00	5.24375	848.692
06:01:00	5.25069	845.562
06:11:00	5.25764	856.479
06:21:00	5.26458	850.391
06:31:00	5.27153	863.311
06:41:00	5.27847	868.746
06:51:00	5.28542	867.321
07:01:00	5.29236	884.114
07:11:00	5.29931	895.054
07:21:00	5.30625	896.775
07:31:00	5.31319	905.522
07:41:00	5.32014	912.296
07:51:00	5.32708	929.999
08:01:00	5.33403	933.528
08:11:00	5.34097	942.307
08:21:00	5.34792	951.573
08:31:00	5.35486	969.906
08:41:00	5.36181	978.919
08:51:00	5.36875	995.828
09:01:00	5.37569	1007.37
09:11:00	5.38264	1019.77
09:21:00	5.38958	1030.7
09:31:00	5.39653	1034.69
09:41:00	5.40347	1061.02
09:51:00	5.41042	1073.02
10:01:00	5.41736	1081.99
10:11:00	5.42431	1101.56
10:21:00	5.43125	1118.26
10:31:00	5.43819	1126.72
10:41:00	5.44514	1147.06
10:51:00	5.45208	1160.49
11:01:00	5.45903	1178.23
11:11:00	5.46597	1192.97
11:21:00	5.47292	1209.93
11:31:00	5.47986	1210.04
11:41:00	5.48681	1241.54
11:51:00	5.49375	1254.24
12:01:00	5.50069	1268.91
12:11:00	5.50764	1274.54
12:21:00	5.51458	1293.28
12:31:00	5.52153	1295.23
12:41:00	5.52847	1318.79
12:51:00	5.53542	1325.35
13:01:00	5.54236	1333.02
13:11:00	5.54931	1340.81
13:21:00	5.55625	1352.49
13:31:00	5.56319	1351.94
13:41:00	5.57014	1358.38
13:51:00	5.57708	1368.75
14:01:00	5.58403	1377.47
14:11:00	5.59097	1375.33
14:21:00	5.59792	1385.45
14:31:00	5.60486	1383.15
14:41:00	5.61181	1370.61
14:51:00	5.61875	1388.68
15:01:00	5.62569	1390.18
15:11:00	5.63264	1381.72
15:21:00	5.63958	1377.08
15:31:00	5.64653	1390.48
15:41:00	5.65347	1385.77
15:51:00	5.66042	1377.96
16:01:00	5.66736	1359.19
16:11:00	5.67431	1362.51
16:21:00	5.68125	1363.15
16:31:00	5.68819	1353.47
16:41:00	5.69514	1344.46
16:51:00	5.70208	1338.82
17:01:00	5.70903	1325.2
17:11:00	5.71597	1318.45
17:21:00	5.72292	1314.86
17:31:00	5.72986	1304.01
17:41:00	5.73681	1294.3
17:51:00	5.74375	1282.31
18:01:00	5.75069	1273.54
18:11:00	5.75764	1262.17
18:21:00	5.76458	1256.41
18:31:00	5.77153	1248.38
18:41:00	5.77847	1226.27
18:51:00	5.78542	1231.19
19:01:00	5.79236	1197.26
19:11:00	5.79931	1210.39
19:21:00	5.80625	1176.35
19:31:00	5.81319	1179.58
19:41:00	5.82014	1149.84
19:51:00	5.82708	1155.18
20:01:00	5.83403	1148.43
20:11:00	5.84097	1127.5
20:21:00	5.84792	1119.3
20:31:00	5.85486	1104.33
20:41:00	5.86181	1084.71
20:51:00	5.86875	1075.74
21:01:00	5.87569	1072.04
21:11:00	5.88264	1070.29
21:21:00	5.88958	1056.89
21:31:00	5.89653	1037.66
21:41:00	5.90347	1034.17
21:51:00	5.91042	1018.85
22:01:00	5.91736	1004.4
22:11:00	5.92431	1003.7
22:21:00	5.93125	983.704
22:31:00	5.93819	978.694
22:41:00	5.94514	960.163
22:51:00	5.95208	955.601
23:01:00	5.95903	944.896
23:11:00	5.96597	938.183
23:21:00	5.97292	925.371
23:31:00	5.97986	916.634
23:41:00	5.98681	912.182
23:51:00	5.99375	899.245
00:01:00	6.00069	895.94
00:11:00	6.00764	877.336
00:21:00	6.01458	878.86
00:31:00	6.02153	869.403
00:41:00	6.02847	861.395
00:51:00	6.03542	859.46
01:01:00	6.04236	848.125
01:11:00	6.04931	834.555
01:21:00	6.05625	825.23
01:31:00	6.06319	813.903
01:41:00	6.07014	816.249
01:51:00	6.07708	812.04
02:01:00	6.08403	798.941
02:11:00	6.09097	795.275
02:21:00	6.09792	787.151
02:31:00	6.10486	780.086
02:41:00	6.11181	777.409
02:51:00	6.11875	764.319
03:01:00	6.12569	758.436
03:11:00	6.13264	759.045
03:21:00	6.13958	757.283
03:31:00	6.14653	751.687
03:41:00	6.15347	742.713
03:51:00	6.16042	750.321
04:01:00	6.16736	736.832
04:11:00	6.17431	734.354
04:21:00	6.18125	730.78
04:31:00	6.18819	732.423
04:41:00	6.19514	727.128
04:51:00	6.20208	723.554
05:01:00	6.20903	729.941
05:11:00	6.21597	722.177
05:21:00	6.22292	719.174
05:31:00	6.22986	713.9
05:41:00	6.23681	717.29
05:51:00	6.24375	711.171
06:01:00	6.25069	716.131
06:11:00	6.25764	709.899
06:21:00	6.26458	723.702
06:31:00	6.27153	712.855
06:41:00	6.27847	713.259
06:51:00	6.28542	716.676
07:01:00	6.29236	715.193
07:11:00	6.29931	706.158
07:21:00	6.30625	720.436
07:31:00	6.31319	726.165
07:41:00	6.32014	722.106
07:51:00	6.32708	720.938
08:01:00	6.33403	730.847
08:11:00	6.34097	733.351
08:21:00	6.34792	740.959
08:31:00	6.35486	734.989
08:41:00	6.36181	747.048
08:51:00	6.36875	737.506
09:01:00	6.37569	743.719
09:11:00	6.38264	745.714
09:21:00	6.38958	748.953
09:31:00	6.39653	761.765
09:41:00	6.40347	763.449
09:51:00	6.41042	762.23
10:01:00	6.41736	773.587
10:11:00	6.42431	781.529
10:21:00	6.43125	782.715
10:31:00	6.43819	782.069
10:41:00	6.44514	782.106
10:51:00	6.45208	793.519
11:01:00	6.45903	787.026
11:11:00	6.46597	800.346
11:21:00	6.47292	802.688
11:31:00	6.47986	807.021
11:41:00	6.48681	808.254
11:51:00	6.49375	814.096
12:01:00	6.50069	820.34
12:11:00	6.50764	817.724
12:21:00	6.51458	823.209
12:31:00	6.52153	828.376
12:41:00	6.52847	828.924
12:51:00	6.53542	827.607
13:01:00	6.54236	830.212
13:11:00	6.54931	827.786
13:21:00	6.55625	837.14
13:31:00	6.56319	834.824
13:41:00	6.57014	835.257
13:51:00	6.57708	850.37
14:01:00	6.58403	845.09
14:11:00	6.59097	838.275
14:21:00	6.59792	846.812
14:31:00	6.60486	838.703
14:41:00	6.61181	843.262
14:51:00	6.61875	834.527
15:01:00	6.62569	833.054
15:11:00	6.63264	836.416
15:21:00	6.63958	830.981
15:31:00	6.64653	837.203
15:41:00	6.65347	825.082
15:51:00	6.66042	830.391
16:01:00	6.66736	826.777
16:11:00	6.67431	829.44
16:21:00	6.68125	825.087
16:31:00	6.68819	817.53
16:41:00	6.69514	817.513
16:51:00	6.70208	811.728
17:01:00	6.70903	808.13
17:11:00	6.71597	801.784
17:21:00	6.72292	803.729
17:31:00	6.72986	801.932
17:41:00	6.73681	792.843
17:51:00	6.74375	789.367
18:01:00	6.75069	795.573
18:11:00	6.75764	786.184
18:21:00	6.76458	783.021
18:31:00	6.77153	773.44
18:41:00	6.77847	773.615
18:51:00	6.78542	766.007
19:01:00	6.79236	757.201
19:11:00	6.79931	755.296
19:21:00	6.80625	744.759
19:31:00	6.81319	744.055
19:41:00	6.82014	736.43
19:51:00	6.82708	734.697
20:01:00	6.83403	730.665
20:11:00	6.84097	722.195
20:21:00	6.84792	714.981
20:31:00	6.85486	716.404
20:41:00	6.86181	711.134
20:51:00	6.86875	703.501
21:01:00	6.87569	703.827
21:11:00	6.88264	690.795
21:21:00	6.88958	686.861
21:31:00	6.89653	690.276
21:41:00	6.90347	685.793
21:51:00	6.91042	679.859
22:01:00	6.91736	678.557
22:11:00	6.92431	668.822
22:21:00	6.93125	662.385
22:31:00	6.93819	656.324
22:41:00	6.94514	650.072
22:51:00	6.95208	648.375
23:01:00	6.95903	641.219
23:11:00	6.96597	643.42
23:21:00	6.97292	636.598
23:31:00	6.97986	627.508
23:41:00	6.98681	630.409
23:51:00	6.99375	617.641
00:01:00	7.00069	616.137
00:11:00	7.00764	613.39
00:21:00	7.01458	603.731
00:31:00	7.02153	604.054
00:41:00	7.02847	599.844
00:51:00	7.03542	590.742
01:01:00	7.04236	599.579
01:11:00	7.04931	587.334
01:21:00	7.05625	589.866
01:31:00	7.06319	578.18
01:41:00	7.07014	580.64
01:51:00	7.07708	575.49
02:01:00	7.08403	577.336
02:11:00	7.09097	574.507
02:21:00	7.09792	565.521
02:31:00	7.10486	565.024
02:41:00	7.11181	566.92
02:51:00	7.11875	566.733
03:01:00	7.12569	558.838
03:11:00	7.13264	554.087
03:21:00	7.13958	554.511
03:31:00	7.14653	555.49
03:41:00	7.15347	547.372
03:51:00	7.16042	551.116
04:01:00	7.16736	547.142
04:11:00	7.17431	549.795
04:21:00	7.18125	547.722
04:31:00	7.18819	549.809
04:41:00	7.19514	535.757
04:51:00	7.20208	541.916
05:01:00	7.20903	535.899
05:11:00	7.21597	536.044
05:21:00	7.22292	534.649
05:31:00	7.22986	537.58
05:41:00	7.23681	536.262
05:51:00	7.24375	531.321
06:01:00	7.25069	525.701
06:11:00	7.25764	532.568
06:21:00	7.26458	532.87
06:31:00	7.27153	524.547
06:41:00	7.27847	530.938
06:51:00	7.28542	530.224
07:01:00	7.29236	530.891
07:11:00	7.29931	534.305
07:21:00	7.30625	532.848
07:31:00	7.31319	534.517
07:41:00	7.32014	533.208
07:51:00	7.32708	540.032
08:01:00	7.33403	539.461
08:11:00	7.34097	538.225
08:21:00	7.34792	535.369
08:31:00	7.35486	532.873
08:41:00	7.36181	535.086
08:51:00	7.36875	529.514
09:01:00	7.37569	536.08
09:11:00	7.38264	533.04
09:21:00	7.38958	538.354
09:31:00	7.39653	542.413
09:41:00	7.40347	534.789
09:51:00	7.41042	538.895
10:01:00	7.41736	536.085
10:11:00	7.42431	533.571
10:21:00	7.43125	533.548
10:31:00	7.43819	537.51
10:41:00	7.44514	535.779
10:51:00	7.45208	541.754
11:01:00	7.45903	540.994
11:11:00	7.46597	535.816
11:21:00	7.47292	536.242
11:31:00	7.47986	535.89
11:41:00	7.48681	541.775
11:51:00	7.49375	537.163
12:01:00	7.50069	533.208
12:11:00	7.50764	532.452
12:21:00	7.51458	534.868
12:31:00	7.52153	537.055
12:41:00	7.52847	529.364
12:51:00	7.53542	535.298
13:01:00	7.54236	536.953
13:11:00	7.54931	533.202
13:21:00	7.55625	535.559
13:31:00	7.56319	526.272
13:41:00	7.57014	525.588
13:51:00	7.57708	523.205
14:01:00	7.58403	528.911
14:11:00	7.59097	525.401
14:21:00	7.59792	521.102
14:31:00	7.60486	524.469
14:41:00	7.61181	522.704
14:51:00	7.61875	520.649
15:01:00	7.62569	522.619
15:11:00	7.63264	524.416
15:21:00	7.63958	520.996
15:31:00	7.64653	513.254
15:41:00	7.65347	515.407
15:51:00	7.66042	517.547
16:01:00	7.66736	511.262
16:11:00	7.67431	516.272
16:21:00	7.68125	520.05
16:31:00	7.68819	509.601
16:41:00	7.69514	512.409
16:51:00	7.70208	513.083
17:01:00	7.70903	511.477
17:11:00	7.71597	513.265
17:21:00	7.72292	507.058
17:31:00	7.72986	505.836
17:41:00	7.73681	510.995
17:51:00	7.74375	507.168
18:01:00	7.75069	506.15
18:11:00	7.75764	504.655
18:21:00	7.76458	500.83
18:31:00	7.77153	495.557
18:41:00	7.77847	497.698
18:51:00	7.78542	499.466

## Sheet: cpc-3KO-raw data
LumiCycle: cpc-3KO-frq.luc (Raw)
Time (hr:min)	Time (days)	counts/sec
12:26:00	0.51806	38.918
12:36:00	0.525	42.256
12:46:00	0.53194	44.352
12:56:00	0.53889	45.819
13:06:00	0.54583	48.397
13:16:00	0.55278	47.548
13:26:00	0.55972	46.443
13:36:00	0.56667	46.554
13:46:00	0.57361	48.39
13:56:00	0.58056	49.718
14:06:00	0.5875	49.269
14:16:00	0.59444	50.544
14:26:00	0.60139	51.868
14:36:00	0.60833	50.214
14:46:00	0.61528	50.291
14:56:00	0.62222	51.804
15:06:00	0.62917	50.812
15:16:00	0.63611	51.821
15:26:00	0.64306	50.475
15:36:00	0.65	50.334
15:46:00	0.65694	49.613
15:56:00	0.66389	50.715
16:06:00	0.67083	52.342
16:16:00	0.67778	51.292
16:26:00	0.68472	51.602
16:36:00	0.69167	50.477
16:46:00	0.69861	51.101
16:56:00	0.70556	50.818
17:06:00	0.7125	49.517
17:16:00	0.71944	48.207
17:26:00	0.72639	50.365
17:36:00	0.73333	49.078
17:46:00	0.74028	49.32
17:56:00	0.74722	49.996
18:06:00	0.75417	48.424
18:16:00	0.76111	49.544
18:26:00	0.76806	49.413
18:36:00	0.775	47.265
18:46:00	0.78194	48.095
18:56:00	0.78889	48.131
19:06:00	0.79583	47.781
19:16:00	0.80278	47.601
19:26:00	0.80972	47.841
19:36:00	0.81667	48.577
19:46:00	0.82361	48.034
19:56:00	0.83056	47.238
20:06:00	0.8375	48.617
20:16:00	0.84444	46.915
20:26:00	0.85139	47.118
20:36:00	0.85833	47.629
20:46:00	0.86528	46.061
20:56:00	0.87222	46.921
21:06:00	0.87917	48.504
21:16:00	0.88611	47.554
21:26:00	0.89306	46.918
21:36:00	0.9	47.959
21:46:00	0.90694	47.265
21:56:00	0.91389	48.3
22:06:00	0.92083	47.32
22:16:00	0.92778	46.735
22:26:00	0.93472	48.036
22:36:00	0.94167	48.112
22:46:00	0.94861	47.559
22:56:00	0.95556	47.006
23:06:00	0.9625	47.095
23:16:00	0.96944	47.621
23:26:00	0.97639	46.631
23:36:00	0.98333	47.486
23:46:00	0.99028	47.538
23:56:00	0.99722	46.603
00:06:00	1.00417	46.791
00:16:00	1.01111	47.133
00:26:00	1.01806	46.255
00:36:00	1.025	45.295
00:46:00	1.03194	46.912
00:56:00	1.03889	45.138
01:06:00	1.04583	47.603
01:16:00	1.05278	45.375
01:26:00	1.05972	45.722
01:36:00	1.06667	46.996
01:46:00	1.07361	47.532
01:56:00	1.08056	46.45
02:06:00	1.0875	46.331
02:16:00	1.09444	45.502
02:26:00	1.10139	46.479
02:36:00	1.10833	46.257
02:46:00	1.11528	46.552
02:56:00	1.12222	45.59
03:06:00	1.12917	45.885
03:16:00	1.13611	46.927
03:26:00	1.14306	46.24
03:36:00	1.15	45.136
03:46:00	1.15694	46.101
03:56:00	1.16389	45.068
04:06:00	1.17083	44.737
04:16:00	1.17778	47.984
04:26:00	1.18472	46.201
04:36:00	1.19167	45.311
04:46:00	1.19861	45.276
04:56:00	1.20556	44.294
05:06:00	1.2125	47.382
05:16:00	1.21944	44.62
05:26:00	1.22639	47.948
05:36:00	1.23333	44.714
05:46:00	1.24028	43.651
05:56:00	1.24722	44.441
06:06:00	1.25417	45.615
06:16:00	1.26111	45.906
06:26:00	1.26806	46.462
06:36:00	1.275	46.125
06:46:00	1.28194	43.144
06:56:00	1.28889	46.889
07:06:00	1.29583	48.034
07:16:00	1.30278	46.208
07:26:00	1.30972	45.854
07:36:00	1.31667	45.352
07:46:00	1.32361	45.481
07:56:00	1.33056	45.967
08:06:00	1.3375	45.781
08:16:00	1.34444	48.284
08:26:00	1.35139	47.167
08:36:00	1.35833	46.551
08:46:00	1.36528	48.591
08:56:00	1.37222	47.122
09:06:00	1.37917	47.375
09:16:00	1.38611	48.263
09:26:00	1.39306	46.906
09:36:00	1.4	47.08
09:46:00	1.40694	46.754
09:56:00	1.41389	47.9
10:06:00	1.42083	49.888
10:16:00	1.42778	50.16
10:26:00	1.43472	51.091
10:36:00	1.44167	51.159
10:46:00	1.44861	51.691
10:56:00	1.45556	48.936
11:06:00	1.4625	49.582
11:16:00	1.46944	49.919
11:26:00	1.47639	51.633
11:36:00	1.48333	52.946
11:46:00	1.49028	54.847
11:56:00	1.49722	53.374
12:06:00	1.50417	53.775
12:16:00	1.51111	53.857
12:26:00	1.51806	56.464
12:36:00	1.525	55.422
12:46:00	1.53194	54.351
12:56:00	1.53889	53.989
13:06:00	1.54583	55.278
13:16:00	1.55278	53.656
13:26:00	1.55972	54.794
13:36:00	1.56667	55.154
13:46:00	1.57361	54.351
13:56:00	1.58056	55.906
14:06:00	1.5875	54.821
14:16:00	1.59444	54.968
14:26:00	1.60139	55.969
14:36:00	1.60833	56.15
14:46:00	1.61528	56.242
14:56:00	1.62222	55.925
15:06:00	1.62917	56.199
15:16:00	1.63611	57.391
15:26:00	1.64306	56.049
15:36:00	1.65	56.487
15:46:00	1.65694	55.723
15:56:00	1.66389	57.445
16:06:00	1.67083	56.719
16:16:00	1.67778	58.56
16:26:00	1.68472	55.484
16:36:00	1.69167	54.207
16:46:00	1.69861	58.301
16:56:00	1.70556	55.45
17:06:00	1.7125	57.972
17:16:00	1.71944	56.698
17:26:00	1.72639	55.266
17:36:00	1.73333	56.759
17:46:00	1.74028	57.07
17:56:00	1.74722	57.549
18:06:00	1.75417	57.489
18:16:00	1.76111	56.257
18:26:00	1.76806	58.424
18:36:00	1.775	56.997
18:46:00	1.78194	57.671
18:56:00	1.78889	56.711
19:06:00	1.79583	58.068
19:16:00	1.80278	58.751
19:26:00	1.80972	56.371
19:36:00	1.81667	57.645
19:46:00	1.82361	57.673
19:56:00	1.83056	56.474
20:06:00	1.8375	58.953
20:16:00	1.84444	57.84
20:26:00	1.85139	57.98
20:36:00	1.85833	59.286
20:46:00	1.86528	57.815
20:56:00	1.87222	55.951
21:06:00	1.87917	57.721
21:16:00	1.88611	59.103
21:26:00	1.89306	59.718
21:36:00	1.9	58.729
21:46:00	1.90694	56.339
21:56:00	1.91389	56.912
22:06:00	1.92083	57.285
22:16:00	1.92778	57.801
22:26:00	1.93472	56.757
22:36:00	1.94167	58.988
22:46:00	1.94861	56.436
22:56:00	1.95556	57.959
23:06:00	1.9625	56.16
23:16:00	1.96944	55.52
23:26:00	1.97639	60.079
23:36:00	1.98333	58.347
23:46:00	1.99028	58.329
23:56:00	1.99722	58.431
00:06:00	2.00417	56.146
00:16:00	2.01111	56.899
00:26:00	2.01806	56.016
00:36:00	2.025	54.631
00:46:00	2.03194	56.649
00:56:00	2.03889	54.837
01:06:00	2.04583	54.524
01:16:00	2.05278	55.24
01:26:00	2.05972	56.255
01:36:00	2.06667	54.6
01:46:00	2.07361	54.097
01:56:00	2.08056	54.911
02:06:00	2.0875	55.89
02:16:00	2.09444	56.999
02:26:00	2.10139	54.837
02:36:00	2.10833	54.832
02:46:00	2.11528	53.43
02:56:00	2.12222	54.226
03:06:00	2.12917	54.402
03:16:00	2.13611	54.767
03:26:00	2.14306	56.982
03:36:00	2.15	56.471
03:46:00	2.15694	56.337
03:56:00	2.16389	56.362
04:06:00	2.17083	55.034
04:16:00	2.17778	56.227
04:26:00	2.18472	56.457
04:36:00	2.19167	56.895
04:46:00	2.19861	56.076
04:56:00	2.20556	55.063
05:06:00	2.2125	54.95
05:16:00	2.21944	55.166
05:26:00	2.22639	55.138
05:36:00	2.23333	56.034
05:46:00	2.24028	56.682
05:56:00	2.24722	53.672
06:06:00	2.25417	57.196
06:16:00	2.26111	56.871
06:26:00	2.26806	55.357
06:36:00	2.275	56.327
06:46:00	2.28194	57.735
06:56:00	2.28889	57.565
07:06:00	2.29583	56.506
07:16:00	2.30278	57.594
07:26:00	2.30972	58.147
07:36:00	2.31667	57.655
07:46:00	2.32361	56.121
07:56:00	2.33056	57.094
08:06:00	2.3375	56.852
08:16:00	2.34444	57.145
08:26:00	2.35139	55.856
08:36:00	2.35833	57.946
08:46:00	2.36528	58.302
08:56:00	2.37222	57.298
09:06:00	2.37917	58.483
09:16:00	2.38611	58.081
09:26:00	2.39306	58.285
09:36:00	2.4	55.502
09:46:00	2.40694	59.923
09:56:00	2.41389	58.779
10:06:00	2.42083	56.745
10:16:00	2.42778	59.496
10:26:00	2.43472	57.451
10:36:00	2.44167	59.753
10:46:00	2.44861	59.117
10:56:00	2.45556	59.608
11:06:00	2.4625	58.795
11:16:00	2.46944	58.765
11:26:00	2.47639	58.758
11:36:00	2.48333	58.417
11:46:00	2.49028	58.72
11:56:00	2.49722	60.922
12:06:00	2.50417	59.534
12:16:00	2.51111	58.696
12:26:00	2.51806	61.109
12:36:00	2.525	60.558
12:46:00	2.53194	60.006
12:56:00	2.53889	58.549
13:06:00	2.54583	60.868
13:16:00	2.55278	61.143
13:26:00	2.55972	60.862
13:36:00	2.56667	61.201
13:46:00	2.57361	60.02
13:56:00	2.58056	62.06
14:06:00	2.5875	61.279
14:16:00	2.59444	63.117
14:26:00	2.60139	60.559
14:36:00	2.60833	61.16
14:46:00	2.61528	62.059
14:56:00	2.62222	60.5
15:06:00	2.62917	61.696
15:16:00	2.63611	61.777
15:26:00	2.64306	61.011
15:36:00	2.65	61.299
15:46:00	2.65694	60.935
15:56:00	2.66389	61.161
16:06:00	2.67083	59.857
16:16:00	2.67778	60.893
16:26:00	2.68472	61.01
16:36:00	2.69167	60.091
16:46:00	2.69861	61.333
16:56:00	2.70556	61.642
17:06:00	2.7125	61.025
17:16:00	2.71944	61.193
17:26:00	2.72639	59.579
17:36:00	2.73333	61.187
17:46:00	2.74028	63.003
17:56:00	2.74722	61.312
18:06:00	2.75417	60.027
18:16:00	2.76111	60.637
18:26:00	2.76806	61.926
18:36:00	2.775	60.423
18:46:00	2.78194	61.634
18:56:00	2.78889	61.414
19:06:00	2.79583	60.51
19:16:00	2.80278	62.36
19:26:00	2.80972	60.293
19:36:00	2.81667	62.313
19:46:00	2.82361	61.873
19:56:00	2.83056	62.505
20:06:00	2.8375	61.302
20:16:00	2.84444	62.4
20:26:00	2.85139	63.839
20:36:00	2.85833	61.911
20:46:00	2.86528	62.937
20:56:00	2.87222	62.47
21:06:00	2.87917	62.913
21:16:00	2.88611	64.965
21:26:00	2.89306	64.716
21:36:00	2.9	62.808
21:46:00	2.90694	65.486
21:56:00	2.91389	62.762
22:06:00	2.92083	64.993
22:16:00	2.92778	63.094
22:26:00	2.93472	64.152
22:36:00	2.94167	62.72
22:46:00	2.94861	62.745
22:56:00	2.95556	63.224
23:06:00	2.9625	64.252
23:16:00	2.96944	64
23:26:00	2.97639	64.44
23:36:00	2.98333	64.805
23:46:00	2.99028	65.581
23:56:00	2.99722	65.589
00:06:00	3.00417	64.64
00:16:00	3.01111	62.757
00:26:00	3.01806	64.084
00:36:00	3.025	67.596
00:46:00	3.03194	65.827
00:56:00	3.03889	63.841
01:06:00	3.04583	65.314
01:16:00	3.05278	65.519
01:26:00	3.05972	65.874
01:36:00	3.06667	63.371
01:46:00	3.07361	63.739
01:56:00	3.08056	65.091
02:06:00	3.0875	65.485
02:16:00	3.09444	65.513
02:26:00	3.10139	66.943
02:36:00	3.10833	66.409
02:46:00	3.11528	66.076
02:56:00	3.12222	65.749
03:06:00	3.12917	67.844
03:16:00	3.13611	66.757
03:26:00	3.14306	66.557
03:36:00	3.15	65.506
03:46:00	3.15694	67.235
03:56:00	3.16389	67.714
04:06:00	3.17083	66.622
04:16:00	3.17778	69.505
04:26:00	3.18472	67.914
04:36:00	3.19167	68.21
04:46:00	3.19861	66.059
04:56:00	3.20556	70.623
05:06:00	3.2125	68.013
05:16:00	3.21944	68.706
05:26:00	3.22639	70
05:36:00	3.23333	68.939
05:46:00	3.24028	69.87
05:56:00	3.24722	67.638
06:06:00	3.25417	68.966
06:16:00	3.26111	69.07
06:26:00	3.26806	68.253
06:36:00	3.275	69.814
06:46:00	3.28194	68.114
06:56:00	3.28889	69.958
07:06:00	3.29583	69.942
07:16:00	3.30278	70.405
07:26:00	3.30972	69.693
07:36:00	3.31667	70.254
07:46:00	3.32361	69.099
07:56:00	3.33056	68.496
08:06:00	3.3375	71.091
08:16:00	3.34444	70.528
08:26:00	3.35139	69.361
08:36:00	3.35833	69.412
08:46:00	3.36528	69.455
08:56:00	3.37222	68.513
09:06:00	3.37917	68.668
09:16:00	3.38611	69.753
09:26:00	3.39306	70.306
09:36:00	3.4	69.134
09:46:00	3.40694	67.871
09:56:00	3.41389	68.812
10:06:00	3.42083	68.114
10:16:00	3.42778	70.789
10:26:00	3.43472	69.539
10:36:00	3.44167	69.783
10:46:00	3.44861	69.568
10:56:00	3.45556	70.401
11:06:00	3.4625	68.351
11:16:00	3.46944	69.024
11:26:00	3.47639	68.246
11:36:00	3.48333	69.992
11:46:00	3.49028	67.892
11:56:00	3.49722	70.579
12:06:00	3.50417	70.024
12:16:00	3.51111	69.797
12:26:00	3.51806	71.459
12:36:00	3.525	69.169
12:46:00	3.53194	71.438
12:56:00	3.53889	70.138
13:06:00	3.54583	69.397
13:16:00	3.55278	67.989
13:26:00	3.55972	68.215
13:36:00	3.56667	67.531
13:46:00	3.57361	68.906
13:56:00	3.58056	69.925
14:06:00	3.5875	68.998
14:16:00	3.59444	69.217
14:26:00	3.60139	68.791
14:36:00	3.60833	69.4
14:46:00	3.61528	69.452
14:56:00	3.62222	69.666
15:06:00	3.62917	66.211
15:16:00	3.63611	68.499
15:26:00	3.64306	68.987
15:36:00	3.65	68.79
15:46:00	3.65694	69.089
15:56:00	3.66389	68.414
16:06:00	3.67083	68.687
16:16:00	3.67778	67.242
16:26:00	3.68472	68.059
16:36:00	3.69167	66.324
16:46:00	3.69861	67.658
16:56:00	3.70556	68.942
17:06:00	3.7125	67.007
17:16:00	3.71944	67.056
17:26:00	3.72639	67.348
17:36:00	3.73333	67.825
17:46:00	3.74028	67.229
17:56:00	3.74722	66.358
18:06:00	3.75417	67.208
18:16:00	3.76111	66.264
18:26:00	3.76806	66.316
18:36:00	3.775	65.449
18:46:00	3.78194	64.534
18:56:00	3.78889	67.407
19:06:00	3.79583	68.062
19:16:00	3.80278	65.662
19:26:00	3.80972	67.041
19:36:00	3.81667	65.552
19:46:00	3.82361	66.867
19:56:00	3.83056	66.324
20:06:00	3.8375	66.552
20:16:00	3.84444	66.982
20:26:00	3.85139	66.768
20:36:00	3.85833	66.545
20:46:00	3.86528	67.065
20:56:00	3.87222	65.433
21:06:00	3.87917	68.552
21:16:00	3.88611	67.21
21:26:00	3.89306	66.885
21:36:00	3.9	65.955
21:46:00	3.90694	67.152
21:56:00	3.91389	66.04
22:06:00	3.92083	66.285
22:16:00	3.92778	65.975
22:26:00	3.93472	66.638
22:36:00	3.94167	67.282
22:46:00	3.94861	66.58
22:56:00	3.95556	67.18
23:06:00	3.9625	66.264
23:16:00	3.96944	68.093
23:26:00	3.97639	66.158
23:36:00	3.98333	69.51
23:46:00	3.99028	67.673
23:56:00	3.99722	67.406
00:06:00	4.00417	68.087
00:16:00	4.01111	68.502
00:26:00	4.01806	68.536
00:36:00	4.025	68.023
00:46:00	4.03194	68.645
00:56:00	4.03889	68.158
01:06:00	4.04583	66.611
01:16:00	4.05278	66.792
01:26:00	4.05972	67.099
01:36:00	4.06667	69.425
01:46:00	4.07361	69.429
01:56:00	4.08056	67.091
02:06:00	4.0875	66.327
02:16:00	4.09444	69.024
02:26:00	4.10139	67.678
02:36:00	4.10833	67.263
02:46:00	4.11528	68.883
02:56:00	4.12222	69.048
03:06:00	4.12917	69.178
03:16:00	4.13611	67.439
03:26:00	4.14306	69.12
03:36:00	4.15	69.881
03:46:00	4.15694	70.388
03:56:00	4.16389	69.186
04:06:00	4.17083	69.276
04:16:00	4.17778	67.065
04:26:00	4.18472	68.018
04:36:00	4.19167	68.304
04:46:00	4.19861	68.878
04:56:00	4.20556	67.319
05:06:00	4.2125	67.874
05:16:00	4.21944	69.598
05:26:00	4.22639	69.083
05:36:00	4.23333	70.318
05:46:00	4.24028	69.029
05:56:00	4.24722	68.082
06:06:00	4.25417	69.54
06:16:00	4.26111	70.643
06:26:00	4.26806	68.666
06:36:00	4.275	70.822
06:46:00	4.28194	68.395
06:56:00	4.28889	69.373
07:06:00	4.29583	69.191
07:16:00	4.30278	68.891
07:26:00	4.30972	70.13
07:36:00	4.31667	69.076
07:46:00	4.32361	68.797
07:56:00	4.33056	70.888
08:06:00	4.3375	68.879
08:16:00	4.34444	68.837
08:26:00	4.35139	69.716
08:36:00	4.35833	69.84
08:46:00	4.36528	68.813
08:56:00	4.37222	69.725
09:06:00	4.37917	70.47
09:16:00	4.38611	67.868
09:26:00	4.39306	68.516
09:36:00	4.4	70.682
09:46:00	4.40694	70.481
09:56:00	4.41389	68.181
10:06:00	4.42083	69.483
10:16:00	4.42778	71.346
10:26:00	4.43472	68.634
10:36:00	4.44167	69.911
10:46:00	4.44861	69.929
10:56:00	4.45556	69.696
11:06:00	4.4625	70.362
11:16:00	4.46944	69.161
11:26:00	4.47639	69.402
11:36:00	4.48333	70.171
11:46:00	4.49028	70.968
11:56:00	4.49722	69.224
12:06:00	4.50417	70.841
12:16:00	4.51111	70.766
12:26:00	4.51806	70.757
12:36:00	4.525	70.549
12:46:00	4.53194	70.63
12:56:00	4.53889	69.997
13:06:00	4.54583	71.587
13:16:00	4.55278	68.966
13:26:00	4.55972	71.144
13:36:00	4.56667	70.383
13:46:00	4.57361	71.63
13:56:00	4.58056	68.609
14:06:00	4.5875	70.669
14:16:00	4.59444	68.184
14:26:00	4.60139	69.43
14:36:00	4.60833	71.582
14:46:00	4.61528	71.073
14:56:00	4.62222	70.438
15:06:00	4.62917	69.949
15:16:00	4.63611	69.834
15:26:00	4.64306	69.739
15:36:00	4.65	70.804
15:46:00	4.65694	68.965
15:56:00	4.66389	69.592
16:06:00	4.67083	70.35
16:16:00	4.67778	69.122
16:26:00	4.68472	71.297
16:36:00	4.69167	69.539
16:46:00	4.69861	68.54
16:56:00	4.70556	69.271
17:06:00	4.7125	69.637
17:16:00	4.71944	68.853
17:26:00	4.72639	70.465
17:36:00	4.73333	69.472
17:46:00	4.74028	70.985
17:56:00	4.74722	69.672
18:06:00	4.75417	68.957
18:16:00	4.76111	70.335
18:26:00	4.76806	67.552
18:36:00	4.775	67.765
18:46:00	4.78194	70.142
18:56:00	4.78889	68.762
19:06:00	4.79583	68.688
19:16:00	4.80278	69.585
19:26:00	4.80972	69.66
19:36:00	4.81667	69.735
19:46:00	4.82361	67.523
19:56:00	4.83056	69.468
20:06:00	4.8375	67.42
20:16:00	4.84444	68.927
20:26:00	4.85139	67.272
20:36:00	4.85833	67.341
20:46:00	4.86528	68.827
20:56:00	4.87222	67.741
21:06:00	4.87917	69.924
21:16:00	4.88611	68.285
21:26:00	4.89306	67.168
21:36:00	4.9	69.602
21:46:00	4.90694	68.721
21:56:00	4.91389	65.362
22:06:00	4.92083	66.219
22:16:00	4.92778	68.964
22:26:00	4.93472	67.956
22:36:00	4.94167	67.555
22:46:00	4.94861	66.089
22:56:00	4.95556	67.957
23:06:00	4.9625	68.219
23:16:00	4.96944	67.465
23:26:00	4.97639	66.918
23:36:00	4.98333	68.188
23:46:00	4.99028	64.771
23:56:00	4.99722	68.915
00:06:00	5.00417	68.624
00:16:00	5.01111	67.612
00:26:00	5.01806	67.486
00:36:00	5.025	66.488
00:46:00	5.03194	65.837
00:56:00	5.03889	66.288
01:06:00	5.04583	63.881
01:16:00	5.05278	64.584
01:26:00	5.05972	65.591
01:36:00	5.06667	65.678
01:46:00	5.07361	66.779
01:56:00	5.08056	66.839
02:06:00	5.0875	65.646
02:16:00	5.09444	64.119
02:26:00	5.10139	65.601
02:36:00	5.10833	64.365
02:46:00	5.11528	67.741
02:56:00	5.12222	65.19
03:06:00	5.12917	66.136
03:16:00	5.13611	64.593
03:26:00	5.14306	65.388
03:36:00	5.15	64.41
03:46:00	5.15694	65.877
03:56:00	5.16389	64.531
04:06:00	5.17083	65.935
04:16:00	5.17778	64.567
04:26:00	5.18472	64.253
04:36:00	5.19167	65.204
04:46:00	5.19861	65.087
04:56:00	5.20556	65.511
05:06:00	5.2125	65.173
05:16:00	5.21944	64.254
05:26:00	5.22639	64.028
05:36:00	5.23333	65.538
05:46:00	5.24028	64.278
05:56:00	5.24722	63.424
06:06:00	5.25417	65.887
06:16:00	5.26111	65.242
06:26:00	5.26806	64.048
06:36:00	5.275	62.447
06:46:00	5.28194	62.48
06:56:00	5.28889	65.359
07:06:00	5.29583	64.947
07:16:00	5.30278	64.423
07:26:00	5.30972	64.777
07:36:00	5.31667	63.98
07:46:00	5.32361	67.19
07:56:00	5.33056	65.107
08:06:00	5.3375	62.767
08:16:00	5.34444	64.193
08:26:00	5.35139	64.513
08:36:00	5.35833	64.318
08:46:00	5.36528	63.415
08:56:00	5.37222	63.8
09:06:00	5.37917	62.92
09:16:00	5.38611	62.27
09:26:00	5.39306	62.609
09:36:00	5.4	63.618
09:46:00	5.40694	63.871
09:56:00	5.41389	63.94
10:06:00	5.42083	63.191
10:16:00	5.42778	63.05
10:26:00	5.43472	63.201
10:36:00	5.44167	65.511
10:46:00	5.44861	64.776
10:56:00	5.45556	61.405
11:06:00	5.4625	63.555
11:16:00	5.46944	62.047
11:26:00	5.47639	60.84
11:36:00	5.48333	63.84
11:46:00	5.49028	62.164
11:56:00	5.49722	63.928
12:06:00	5.50417	60.281
12:16:00	5.51111	63.327
12:26:00	5.51806	61.172
12:36:00	5.525	61.87
12:46:00	5.53194	63.228
12:56:00	5.53889	61.916
13:06:00	5.54583	61.805
13:16:00	5.55278	61.27
13:26:00	5.55972	63.22
13:36:00	5.56667	61.559
13:46:00	5.57361	60.631
13:56:00	5.58056	63.571
14:06:00	5.5875	62.746
14:16:00	5.59444	63.427
14:26:00	5.60139	62.078
14:36:00	5.60833	61.892
14:46:00	5.61528	62.313
14:56:00	5.62222	60.401
15:06:00	5.62917	61.944
15:16:00	5.63611	60.995
15:26:00	5.64306	60.582
15:36:00	5.65	61.687
15:46:00	5.65694	61.804
15:56:00	5.66389	61.816
16:06:00	5.67083	61.354
16:16:00	5.67778	60.193
16:26:00	5.68472	60.834
16:36:00	5.69167	62.809
16:46:00	5.69861	63.108
16:56:00	5.70556	62.478
17:06:00	5.7125	62.622
17:16:00	5.71944	60.831
17:26:00	5.72639	61.186
17:36:00	5.73333	60.801
17:46:00	5.74028	62.869
17:56:00	5.74722	61.579
18:06:00	5.75417	60.861
18:16:00	5.76111	59.662
18:26:00	5.76806	61.737
18:36:00	5.775	60.259
18:46:00	5.78194	59.722
18:56:00	5.78889	58.297
19:06:00	5.79583	60.271
19:16:00	5.80278	60.281
19:26:00	5.80972	60.026
19:36:00	5.81667	60.867
19:46:00	5.82361	60.609
19:56:00	5.83056	59.682
20:06:00	5.8375	59.214
20:16:00	5.84444	60.016
20:26:00	5.85139	60.57
20:36:00	5.85833	61.244
20:46:00	5.86528	60.234
20:56:00	5.87222	59.435
21:06:00	5.87917	60.479
21:16:00	5.88611	60.599
21:26:00	5.89306	59.893
21:36:00	5.9	60.338
21:46:00	5.90694	58.887
21:56:00	5.91389	59.866
22:06:00	5.92083	58.935
22:16:00	5.92778	60.629
22:26:00	5.93472	62.048
22:36:00	5.94167	58.874
22:46:00	5.94861	59.366
22:56:00	5.95556	59.78
23:06:00	5.9625	59.496
23:16:00	5.96944	60.057
23:26:00	5.97639	58.335
23:36:00	5.98333	59.298
23:46:00	5.99028	58.72
23:56:00	5.99722	59.964
00:06:00	6.00417	60.379
00:16:00	6.01111	60.489
00:26:00	6.01806	59.529
00:36:00	6.025	60.488
00:46:00	6.03194	58.353
00:56:00	6.03889	57.618
01:06:00	6.04583	59.091
01:16:00	6.05278	59.806
01:26:00	6.05972	56.707
01:36:00	6.06667	59.81
01:46:00	6.07361	59.003
01:56:00	6.08056	57.801
02:06:00	6.0875	57.553
02:16:00	6.09444	57.949
02:26:00	6.10139	58.61
02:36:00	6.10833	57.322
02:46:00	6.11528	57.978
02:56:00	6.12222	59.489
03:06:00	6.12917	58.496
03:16:00	6.13611	56.465
03:26:00	6.14306	58.879
03:36:00	6.15	59.744
03:46:00	6.15694	59.073
03:56:00	6.16389	58.314
04:06:00	6.17083	58.673
04:16:00	6.17778	57.114
04:26:00	6.18472	57.774
04:36:00	6.19167	58.948
04:46:00	6.19861	59.265
04:56:00	6.20556	58.203
05:06:00	6.2125	57.123
05:16:00	6.21944	57.02
05:26:00	6.22639	57.776
05:36:00	6.23333	57.487
05:46:00	6.24028	55.571
05:56:00	6.24722	55.258
06:06:00	6.25417	57.624
06:16:00	6.26111	56.332
06:26:00	6.26806	55.956
06:36:00	6.275	59.243
06:46:00	6.28194	56.523
06:56:00	6.28889	55.85
07:06:00	6.29583	56.702
07:16:00	6.30278	57.266
07:26:00	6.30972	56.151
07:36:00	6.31667	57.217
07:46:00	6.32361	55.707
07:56:00	6.33056	54.983
08:06:00	6.3375	59.409
08:16:00	6.34444	55.54
08:26:00	6.35139	57.743
08:36:00	6.35833	57.117
08:46:00	6.36528	55.806
08:56:00	6.37222	54.418
09:06:00	6.37917	54.392
09:16:00	6.38611	57.546
09:26:00	6.39306	53.613
09:36:00	6.4	55.914
09:46:00	6.40694	54.608
09:56:00	6.41389	56.428
10:06:00	6.42083	55.03
10:16:00	6.42778	55.46
10:26:00	6.43472	53.816
10:36:00	6.44167	55.788
10:46:00	6.44861	54.204
10:56:00	6.45556	54.917
11:06:00	6.4625	55.231
11:16:00	6.46944	54.947
11:26:00	6.47639	55.86
11:36:00	6.48333	54.524
11:46:00	6.49028	56.474
11:56:00	6.49722	54.728
12:06:00	6.50417	55.382
12:16:00	6.51111	55.275
12:26:00	6.51806	56.204
12:36:00	6.525	55.571
12:46:00	6.53194	54.179
12:56:00	6.53889	53.306
13:06:00	6.54583	54.369
13:16:00	6.55278	54.585
13:26:00	6.55972	55.431
13:36:00	6.56667	54.137
13:46:00	6.57361	55.411
13:56:00	6.58056	54.941
14:06:00	6.5875	54.101
14:16:00	6.59444	53.369
14:26:00	6.60139	56.765
14:36:00	6.60833	54.5
14:46:00	6.61528	54.239
14:56:00	6.62222	54.602
15:06:00	6.62917	53.818
15:16:00	6.63611	53.39
15:26:00	6.64306	54.789
15:36:00	6.65	54.362
15:46:00	6.65694	54.983
15:56:00	6.66389	54.595
16:06:00	6.67083	55.214
16:16:00	6.67778	54.878
16:26:00	6.68472	53.163
16:36:00	6.69167	52.437
16:46:00	6.69861	53.181
16:56:00	6.70556	55.464
17:06:00	6.7125	53.578
17:16:00	6.71944	52.724
17:26:00	6.72639	53.859
17:36:00	6.73333	53.874
17:46:00	6.74028	54.927
17:56:00	6.74722	52.298
18:06:00	6.75417	51.425
18:16:00	6.76111	52.233
18:26:00	6.76806	52.667
18:36:00	6.775	53.09
18:46:00	6.78194	51.41
18:56:00	6.78889	52.361
19:06:00	6.79583	52.919
19:16:00	6.80278	51.74
19:26:00	6.80972	51.752
19:36:00	6.81667	53.222
19:46:00	6.82361	52.833
19:56:00	6.83056	54.384
20:06:00	6.8375	51.421
20:16:00	6.84444	51.777
20:26:00	6.85139	52.839
20:36:00	6.85833	51.454
20:46:00	6.86528	51.417
20:56:00	6.87222	52.46
21:06:00	6.87917	53.383
21:16:00	6.88611	50.983
21:26:00	6.89306	52.368
21:36:00	6.9	50.716
21:46:00	6.90694	52.898
21:56:00	6.91389	50.685
22:06:00	6.92083	52.133
22:16:00	6.92778	52.782
22:26:00	6.93472	51.22
22:36:00	6.94167	51.192
22:46:00	6.94861	52.189
22:56:00	6.95556	52.484
23:06:00	6.9625	52.958
23:16:00	6.96944	53.545
23:26:00	6.97639	49.91
23:36:00	6.98333	51.021
23:46:00	6.99028	50.949
23:56:00	6.99722	51.938
00:06:00	7.00417	51.389
00:16:00	7.01111	51.122
00:26:00	7.01806	53.081
00:36:00	7.025	48.72
00:46:00	7.03194	50.872
00:56:00	7.03889	51.769
01:06:00	7.04583	51.816
01:16:00	7.05278	51.504
01:26:00	7.05972	50.605
01:36:00	7.06667	52.31
01:46:00	7.07361	51.555
01:56:00	7.08056	50.674
02:06:00	7.0875	51.709
02:16:00	7.09444	50.488
02:26:00	7.10139	50.246
02:36:00	7.10833	49.015
02:46:00	7.11528	50.781
02:56:00	7.12222	48.844
03:06:00	7.12917	49.98
03:16:00	7.13611	51.012
03:26:00	7.14306	51.445
03:36:00	7.15	51.052
03:46:00	7.15694	49.851
03:56:00	7.16389	49.187
04:06:00	7.17083	50.315
04:16:00	7.17778	50.981
04:26:00	7.18472	50.721
04:36:00	7.19167	50.103
04:46:00	7.19861	49.654
04:56:00	7.20556	49.014
05:06:00	7.2125	49.795
05:16:00	7.21944	48.628
05:26:00	7.22639	51.834
05:36:00	7.23333	50.484
05:46:00	7.24028	50.029
05:56:00	7.24722	50.426
06:06:00	7.25417	49.579
06:16:00	7.26111	49.039
06:26:00	7.26806	47.663
06:36:00	7.275	48.977
06:46:00	7.28194	50.308
06:56:00	7.28889	49.76
07:06:00	7.29583	50.285
07:16:00	7.30278	48.61
07:26:00	7.30972	50.357
07:36:00	7.31667	48.584
07:46:00	7.32361	49.319
07:56:00	7.33056	50.144
08:06:00	7.3375	50.6
08:16:00	7.34444	49.168
08:26:00	7.35139	50.165
08:36:00	7.35833	49.361
08:46:00	7.36528	48.795
08:56:00	7.37222	48.736
09:06:00	7.37917	50.111
09:16:00	7.38611	50.747
09:26:00	7.39306	48.531
09:36:00	7.4	47.886
09:46:00	7.40694	48.732
09:56:00	7.41389	48.92
10:06:00	7.42083	49.022
10:16:00	7.42778	49.618
10:26:00	7.43472	48.082
10:36:00	7.44167	48.175
10:46:00	7.44861	48.307
10:56:00	7.45556	48.696
11:06:00	7.4625	49.414
11:16:00	7.46944	48.553
11:26:00	7.47639	49.168
11:36:00	7.48333	49.176
11:46:00	7.49028	48.268
11:56:00	7.49722	48.096
12:06:00	7.50417	49.235
12:16:00	7.51111	49.007
12:26:00	7.51806	46.979
12:36:00	7.525	48.041
12:46:00	7.53194	48.053
12:56:00	7.53889	47.183
13:06:00	7.54583	50.481
13:16:00	7.55278	48.391
13:26:00	7.55972	48.599
13:36:00	7.56667	48.212
13:46:00	7.57361	50.247
13:56:00	7.58056	48.267
14:06:00	7.5875	47.119
14:16:00	7.59444	47.878
14:26:00	7.60139	49.093
14:36:00	7.60833	48.274
14:46:00	7.61528	48.574
14:56:00	7.62222	46.128
15:06:00	7.62917	46.519
15:16:00	7.63611	45.435
15:26:00	7.64306	48.489
15:36:00	7.65	46.769
15:46:00	7.65694	48.475
15:56:00	7.66389	47.363
16:06:00	7.67083	47.083
16:16:00	7.67778	48.315
16:26:00	7.68472	48.331
16:36:00	7.69167	46.797
16:46:00	7.69861	47.533
16:56:00	7.70556	48.461
17:06:00	7.7125	48.613
17:16:00	7.71944	47.854
17:26:00	7.72639	49.063
17:36:00	7.73333	48.353
17:46:00	7.74028	48.543
17:56:00	7.74722	46.989
18:06:00	7.75417	48.24
18:16:00	7.76111	46.472
18:26:00	7.76806	46.555
18:36:00	7.775	46.913
18:46:00	7.78194	48.802
18:56:00	7.78889	46.36

## Sheet: cpc-1KO-raw data
LumiCycle: cpc1KO-frq.luc (Raw)
Time (hr:min)	Time (days)	counts/sec
01:16:00	1.05278	41.758
01:26:00	1.05972	43.577
01:36:00	1.06667	43.001
01:46:00	1.07361	42.529
01:56:00	1.08056	42.018
02:06:00	1.0875	44.257
02:16:00	1.09444	45.747
02:26:00	1.10139	45.543
02:36:00	1.10833	45.494
02:46:00	1.11528	42.589
02:56:00	1.12222	43.457
03:06:00	1.12917	42.183
03:16:00	1.13611	44.305
03:26:00	1.14306	44.197
03:36:00	1.15	43.363
03:46:00	1.15694	46.26
03:56:00	1.16389	45.515
04:06:00	1.17083	46.725
04:16:00	1.17778	44.913
04:26:00	1.18472	45.049
04:36:00	1.19167	45.988
04:46:00	1.19861	46.112
04:56:00	1.20556	46.572
05:06:00	1.2125	47.728
05:16:00	1.21944	48.454
05:26:00	1.22639	47.688
05:36:00	1.23333	49.192
05:46:00	1.24028	48.521
05:56:00	1.24722	51.531
06:06:00	1.25417	49.992
06:16:00	1.26111	50.72
06:26:00	1.26806	50.468
06:36:00	1.275	52.344
06:46:00	1.28194	51.718
06:56:00	1.28889	53.297
07:06:00	1.29583	54.594
07:16:00	1.30278	53.887
07:26:00	1.30972	58.93
07:36:00	1.31667	57.349
07:46:00	1.32361	56.445
07:56:00	1.33056	57.822
08:06:00	1.3375	59.242
08:16:00	1.34444	58.705
08:26:00	1.35139	60.039
08:36:00	1.35833	61.891
08:46:00	1.36528	63.404
08:56:00	1.37222	60.966
09:06:00	1.37917	62.902
09:16:00	1.38611	63.731
09:26:00	1.39306	64.23
09:36:00	1.4	62.745
09:46:00	1.40694	64.839
09:56:00	1.41389	67.123
10:06:00	1.42083	67.185
10:16:00	1.42778	67.706
10:26:00	1.43472	68.236
10:36:00	1.44167	71.896
10:46:00	1.44861	70.51
10:56:00	1.45556	72.734
11:06:00	1.4625	70.205
11:16:00	1.46944	69.899
11:26:00	1.47639	71.664
11:36:00	1.48333	72.316
11:46:00	1.49028	71.876
11:56:00	1.49722	73.879
12:06:00	1.50417	72.483
12:16:00	1.51111	76.398
12:26:00	1.51806	73.424
12:36:00	1.525	76.562
12:46:00	1.53194	74.278
12:56:00	1.53889	76.207
13:06:00	1.54583	76.51
13:16:00	1.55278	74.985
13:26:00	1.55972	77.161
13:36:00	1.56667	78.808
13:46:00	1.57361	75.87
13:56:00	1.58056	77.248
14:06:00	1.5875	76.481
14:16:00	1.59444	77.577
14:26:00	1.60139	77.267
14:36:00	1.60833	75.471
14:46:00	1.61528	78.708
14:56:00	1.62222	77.182
15:06:00	1.62917	76.749
15:16:00	1.63611	78.649
15:26:00	1.64306	77.387
15:36:00	1.65	76.563
15:46:00	1.65694	75.162
15:56:00	1.66389	75.071
16:06:00	1.67083	75.938
16:16:00	1.67778	76.069
16:26:00	1.68472	74.805
16:36:00	1.69167	75.187
16:46:00	1.69861	74.758
16:56:00	1.70556	74.241
17:06:00	1.7125	73.247
17:16:00	1.71944	75.501
17:26:00	1.72639	73.827
17:36:00	1.73333	72.344
17:46:00	1.74028	73.096
17:56:00	1.74722	72.635
18:06:00	1.75417	71.97
18:16:00	1.76111	73.181
18:26:00	1.76806	72.411
18:36:00	1.775	70.558
18:46:00	1.78194	70.757
18:56:00	1.78889	71.379
19:06:00	1.79583	70.578
19:16:00	1.80278	68.965
19:26:00	1.80972	68.994
19:36:00	1.81667	68.575
19:46:00	1.82361	68.321
19:56:00	1.83056	68.187
20:06:00	1.8375	67.917
20:16:00	1.84444	70.199
20:26:00	1.85139	68.985
20:36:00	1.85833	68.154
20:46:00	1.86528	68.995
20:56:00	1.87222	66.196
21:06:00	1.87917	67.764
21:16:00	1.88611	66.587
21:26:00	1.89306	65.394
21:36:00	1.9	65.487
21:46:00	1.90694	66.365
21:56:00	1.91389	66.457
22:06:00	1.92083	67.618
22:16:00	1.92778	66.12
22:26:00	1.93472	67.002
22:36:00	1.94167	66.48
22:46:00	1.94861	65.825
22:56:00	1.95556	64.789
23:06:00	1.9625	64.052
23:16:00	1.96944	65.055
23:26:00	1.97639	62.901
23:36:00	1.98333	63.79
23:46:00	1.99028	62.376
23:56:00	1.99722	63.842
00:06:00	2.00417	62.453
00:16:00	2.01111	63.328
00:26:00	2.01806	64.988
00:36:00	2.025	62.592
00:46:00	2.03194	64.192
00:56:00	2.03889	62.876
01:06:00	2.04583	63.504
01:16:00	2.05278	61.762
01:26:00	2.05972	63.412
01:36:00	2.06667	63.056
01:46:00	2.07361	62.296
01:56:00	2.08056	60.241
02:06:00	2.0875	61.008
02:16:00	2.09444	62.908
02:26:00	2.10139	62.158
02:36:00	2.10833	63.126
02:46:00	2.11528	63.283
02:56:00	2.12222	59.892
03:06:00	2.12917	60.625
03:16:00	2.13611	61.213
03:26:00	2.14306	61.375
03:36:00	2.15	60.94
03:46:00	2.15694	61.59
03:56:00	2.16389	60.891
04:06:00	2.17083	60.682
04:16:00	2.17778	60.422
04:26:00	2.18472	59.123
04:36:00	2.19167	60.495
04:46:00	2.19861	59.691
04:56:00	2.20556	59.99
05:06:00	2.2125	61.056
05:16:00	2.21944	60.559
05:26:00	2.22639	59.806
05:36:00	2.23333	60.641
05:46:00	2.24028	59.82
05:56:00	2.24722	61.412
06:06:00	2.25417	60.771
06:16:00	2.26111	61.222
06:26:00	2.26806	60.721
06:36:00	2.275	63.217
06:46:00	2.28194	63.764
06:56:00	2.28889	61.948
07:06:00	2.29583	60.267
07:16:00	2.30278	60.781
07:26:00	2.30972	63.08
07:36:00	2.31667	61.776
07:46:00	2.32361	61.467
07:56:00	2.33056	60.291
08:06:00	2.3375	60.396
08:16:00	2.34444	63.125
08:26:00	2.35139	62.652
08:36:00	2.35833	62.412
08:46:00	2.36528	61.831
08:56:00	2.37222	62.587
09:06:00	2.37917	62.978
09:16:00	2.38611	61.554
09:26:00	2.39306	63.098
09:36:00	2.4	62.501
09:46:00	2.40694	62.428
09:56:00	2.41389	61.82
10:06:00	2.42083	62.367
10:16:00	2.42778	61.901
10:26:00	2.43472	63.328
10:36:00	2.44167	62.345
10:46:00	2.44861	62.834
10:56:00	2.45556	61.28
11:06:00	2.4625	64.779
11:16:00	2.46944	62.525
11:26:00	2.47639	62.443
11:36:00	2.48333	61.11
11:46:00	2.49028	65.132
11:56:00	2.49722	62.061
12:06:00	2.50417	62.069
12:16:00	2.51111	62.5
12:26:00	2.51806	62.261
12:36:00	2.525	61.466
12:46:00	2.53194	61.433
12:56:00	2.53889	62.505
13:06:00	2.54583	63.648
13:16:00	2.55278	61.878
13:26:00	2.55972	64.493
13:36:00	2.56667	62.728
13:46:00	2.57361	62.484
13:56:00	2.58056	62.709
14:06:00	2.5875	62.661
14:16:00	2.59444	62.786
14:26:00	2.60139	60.948
14:36:00	2.60833	60.944
14:46:00	2.61528	62.116
14:56:00	2.62222	60.457
15:06:00	2.62917	62.344
15:16:00	2.63611	61.259
15:26:00	2.64306	61.199
15:36:00	2.65	60.953
15:46:00	2.65694	62.461
15:56:00	2.66389	60.513
16:06:00	2.67083	58.806
16:16:00	2.67778	60.028
16:26:00	2.68472	61.024
16:36:00	2.69167	59.385
16:46:00	2.69861	61.347
16:56:00	2.70556	58.933
17:06:00	2.7125	59.757
17:16:00	2.71944	59.075
17:26:00	2.72639	58.642
17:36:00	2.73333	57.657
17:46:00	2.74028	57.787
17:56:00	2.74722	57.928
18:06:00	2.75417	58.917
18:16:00	2.76111	58.029
18:26:00	2.76806	57.067
18:36:00	2.775	57.988
18:46:00	2.78194	59.143
18:56:00	2.78889	57.7
19:06:00	2.79583	58.824
19:16:00	2.80278	58.989
19:26:00	2.80972	58.102
19:36:00	2.81667	57.427
19:46:00	2.82361	58.36
19:56:00	2.83056	58.641
20:06:00	2.8375	58.651
20:16:00	2.84444	56.33
20:26:00	2.85139	57.249
20:36:00	2.85833	57.979
20:46:00	2.86528	58.87
20:56:00	2.87222	54.478
21:06:00	2.87917	56.649
21:16:00	2.88611	55.709
21:26:00	2.89306	57.209
21:36:00	2.9	56.929
21:46:00	2.90694	56.559
21:56:00	2.91389	55.606
22:06:00	2.92083	55.482
22:16:00	2.92778	57.445
22:26:00	2.93472	55.984
22:36:00	2.94167	58.7
22:46:00	2.94861	57.269
22:56:00	2.95556	57.431
23:06:00	2.9625	55.408
23:16:00	2.96944	57.457
23:26:00	2.97639	57.375
23:36:00	2.98333	58.452
23:46:00	2.99028	57.362
23:56:00	2.99722	56.975
00:06:00	3.00417	56.859
00:16:00	3.01111	57.442
00:26:00	3.01806	56.93
00:36:00	3.025	56.961
00:46:00	3.03194	57.121
00:56:00	3.03889	57.175
01:06:00	3.04583	57.128
01:16:00	3.05278	56.052
01:26:00	3.05972	56.033
01:36:00	3.06667	56.203
01:46:00	3.07361	56.62
01:56:00	3.08056	55.938
02:06:00	3.0875	56.507
02:16:00	3.09444	56.828
02:26:00	3.10139	57.329
02:36:00	3.10833	59.035
02:46:00	3.11528	56.525
02:56:00	3.12222	56.776
03:06:00	3.12917	57.093
03:16:00	3.13611	56.72
03:26:00	3.14306	57.16
03:36:00	3.15	57.763
03:46:00	3.15694	56.556
03:56:00	3.16389	55.883
04:06:00	3.17083	56.184
04:16:00	3.17778	56.606
04:26:00	3.18472	55.858
04:36:00	3.19167	57.238
04:46:00	3.19861	57.301
04:56:00	3.20556	56.755
05:06:00	3.2125	56.649
05:16:00	3.21944	56.111
05:26:00	3.22639	57.14
05:36:00	3.23333	59.37
05:46:00	3.24028	58.429
05:56:00	3.24722	56.824
06:06:00	3.25417	57.98
06:16:00	3.26111	57.167
06:26:00	3.26806	56.071
06:36:00	3.275	58.613
06:46:00	3.28194	58.402
06:56:00	3.28889	57.47
07:06:00	3.29583	57.48
07:16:00	3.30278	57.019
07:26:00	3.30972	56.939
07:36:00	3.31667	57.266
07:46:00	3.32361	58.596
07:56:00	3.33056	58.373
08:06:00	3.3375	56.619
08:16:00	3.34444	58.032
08:26:00	3.35139	57.633
08:36:00	3.35833	57.776
08:46:00	3.36528	58.167
08:56:00	3.37222	56.247
09:06:00	3.37917	56.717
09:16:00	3.38611	57.55
09:26:00	3.39306	58.564
09:36:00	3.4	58.292
09:46:00	3.40694	57.491
09:56:00	3.41389	56.964
10:06:00	3.42083	56.454
10:16:00	3.42778	59.652
10:26:00	3.43472	57.827
10:36:00	3.44167	58.95
10:46:00	3.44861	58.464
10:56:00	3.45556	57.623
11:06:00	3.4625	57.106
11:16:00	3.46944	56.482
11:26:00	3.47639	57.642
11:36:00	3.48333	58.433
11:46:00	3.49028	57.852
11:56:00	3.49722	58.201
12:06:00	3.50417	57.11
12:16:00	3.51111	57.816
12:26:00	3.51806	57.24
12:36:00	3.525	57.386
12:46:00	3.53194	57.88
12:56:00	3.53889	56.989
13:06:00	3.54583	55.909
13:16:00	3.55278	55.862
13:26:00	3.55972	56.86
13:36:00	3.56667	58.614
13:46:00	3.57361	57.254
13:56:00	3.58056	57.055
14:06:00	3.5875	57.729
14:16:00	3.59444	56.613
14:26:00	3.60139	57.657
14:36:00	3.60833	56.584
14:46:00	3.61528	56.7
14:56:00	3.62222	54.479
15:06:00	3.62917	56.571
15:16:00	3.63611	55.355
15:26:00	3.64306	53.962
15:36:00	3.65	55.988
15:46:00	3.65694	56.428
15:56:00	3.66389	54.734
16:06:00	3.67083	55.99
16:16:00	3.67778	54.912
16:26:00	3.68472	55.861
16:36:00	3.69167	54.744
16:46:00	3.69861	56.089
16:56:00	3.70556	55.387
17:06:00	3.7125	56.732
17:16:00	3.71944	55.62
17:26:00	3.72639	53.31
17:36:00	3.73333	54.9
17:46:00	3.74028	55.346
17:56:00	3.74722	56.662
18:06:00	3.75417	55.06
18:16:00	3.76111	56.027
18:26:00	3.76806	53.779
18:36:00	3.775	54.562
18:46:00	3.78194	53.157
18:56:00	3.78889	52.681
19:06:00	3.79583	54.02
19:16:00	3.80278	52.708
19:26:00	3.80972	53.143
19:36:00	3.81667	54.545
19:46:00	3.82361	52.794
19:56:00	3.83056	52.837
20:06:00	3.8375	53.242
20:16:00	3.84444	53.802
20:26:00	3.85139	53.803
20:36:00	3.85833	53.85
20:46:00	3.86528	54.298
20:56:00	3.87222	53.459
21:06:00	3.87917	53.653
21:16:00	3.88611	54.263
21:26:00	3.89306	53.084
21:36:00	3.9	55.596
21:46:00	3.90694	54.975
21:56:00	3.91389	53.218
22:06:00	3.92083	53.089
22:16:00	3.92778	55.457
22:26:00	3.93472	52.789
22:36:00	3.94167	55.454
22:46:00	3.94861	53.757
22:56:00	3.95556	54.758
23:06:00	3.9625	54.764
23:16:00	3.96944	52.984
23:26:00	3.97639	55.254
23:36:00	3.98333	53.284
23:46:00	3.99028	54.26
23:56:00	3.99722	54.083
00:06:00	4.00417	53.697
00:16:00	4.01111	54.26
00:26:00	4.01806	54.111
00:36:00	4.025	54.629
00:46:00	4.03194	54.311
00:56:00	4.03889	54.31
01:06:00	4.04583	54.493
01:16:00	4.05278	53.508
01:26:00	4.05972	51.996
01:36:00	4.06667	53.623
01:46:00	4.07361	52.936
01:56:00	4.08056	53.958
02:06:00	4.0875	55.025
02:16:00	4.09444	54.386
02:26:00	4.10139	54.197
02:36:00	4.10833	54.828
02:46:00	4.11528	54.343
02:56:00	4.12222	55.763
03:06:00	4.12917	55.118
03:16:00	4.13611	55.26
03:26:00	4.14306	55.348
03:36:00	4.15	57.87
03:46:00	4.15694	54.585
03:56:00	4.16389	55.47
04:06:00	4.17083	56.565
04:16:00	4.17778	54.659
04:26:00	4.18472	55.502
04:36:00	4.19167	54.49
04:46:00	4.19861	54.304
04:56:00	4.20556	54.639
05:06:00	4.2125	55.784
05:16:00	4.21944	56.07
05:26:00	4.22639	57.111
05:36:00	4.23333	53.898
05:46:00	4.24028	55.845
05:56:00	4.24722	55.636
06:06:00	4.25417	56.243
06:16:00	4.26111	55.699
06:26:00	4.26806	54.745
06:36:00	4.275	56.943
06:46:00	4.28194	54.826
06:56:00	4.28889	55.677
07:06:00	4.29583	56.081
07:16:00	4.30278	57.937
07:26:00	4.30972	56.21
07:36:00	4.31667	56.01
07:46:00	4.32361	57.06
07:56:00	4.33056	56.303
08:06:00	4.3375	57.401
08:16:00	4.34444	55.68
08:26:00	4.35139	58.31
08:36:00	4.35833	57.982
08:46:00	4.36528	55.577
08:56:00	4.37222	57.019
09:06:00	4.37917	56.477
09:16:00	4.38611	56.259
09:26:00	4.39306	56.89
09:36:00	4.4	56.416
09:46:00	4.40694	56.584
09:56:00	4.41389	57.446
10:06:00	4.42083	56.385
10:16:00	4.42778	55.666
10:26:00	4.43472	55.702
10:36:00	4.44167	55.195
10:46:00	4.44861	58.577
10:56:00	4.45556	55.221
11:06:00	4.4625	55.719
11:16:00	4.46944	56.387
11:26:00	4.47639	56.163
11:36:00	4.48333	58.168
11:46:00	4.49028	55.994
11:56:00	4.49722	56.744
12:06:00	4.50417	56.384
12:16:00	4.51111	57.674
12:26:00	4.51806	58.357
12:36:00	4.525	58.498
12:46:00	4.53194	58.224
12:56:00	4.53889	56.678
13:06:00	4.54583	56.777
13:16:00	4.55278	55.946
13:26:00	4.55972	57.163
13:36:00	4.56667	56.75
13:46:00	4.57361	57.981
13:56:00	4.58056	56.939
14:06:00	4.5875	59.106
14:16:00	4.59444	58.433
14:26:00	4.60139	56.844
14:36:00	4.60833	57.522
14:46:00	4.61528	55.04
14:56:00	4.62222	58.753
15:06:00	4.62917	59.098
15:16:00	4.63611	56.677
15:26:00	4.64306	57.02
15:36:00	4.65	57.387
15:46:00	4.65694	57.876
15:56:00	4.66389	56.735
16:06:00	4.67083	58.606
16:16:00	4.67778	57.009
16:26:00	4.68472	58.321
16:36:00	4.69167	55.761
16:46:00	4.69861	56.665
16:56:00	4.70556	57.061
17:06:00	4.7125	55.96
17:16:00	4.71944	55.354
17:26:00	4.72639	57.182
17:36:00	4.73333	56.514
17:46:00	4.74028	56.171
17:56:00	4.74722	56.129
18:06:00	4.75417	55.102
18:16:00	4.76111	56.113
18:26:00	4.76806	56.313
18:36:00	4.775	56.214
18:46:00	4.78194	55.537
18:56:00	4.78889	54.796
19:06:00	4.79583	56.611
19:16:00	4.80278	55.556
19:26:00	4.80972	56.411
19:36:00	4.81667	56.319
19:46:00	4.82361	56.358
19:56:00	4.83056	56.543
20:06:00	4.8375	55.552
20:16:00	4.84444	56.717
20:26:00	4.85139	55.983
20:36:00	4.85833	55.877
20:46:00	4.86528	55.508
20:56:00	4.87222	55.593
21:06:00	4.87917	55.168
21:16:00	4.88611	55.274
21:26:00	4.89306	55.17
21:36:00	4.9	54.289
21:46:00	4.90694	55.62
21:56:00	4.91389	55.413
22:06:00	4.92083	56.751
22:16:00	4.92778	55.422
22:26:00	4.93472	55.391
22:36:00	4.94167	53.94
22:46:00	4.94861	56.437
22:56:00	4.95556	54.034
23:06:00	4.9625	54.428
23:16:00	4.96944	54.203
23:26:00	4.97639	56.27
23:36:00	4.98333	55.883
23:46:00	4.99028	53.585
23:56:00	4.99722	56.008
00:06:00	5.00417	55.441
00:16:00	5.01111	53.091
00:26:00	5.01806	54.658
00:36:00	5.025	56.144
00:46:00	5.03194	54.958
00:56:00	5.03889	54.155
01:06:00	5.04583	55.465
01:16:00	5.05278	54.106
01:26:00	5.05972	55.881
01:36:00	5.06667	57.386
01:46:00	5.07361	53.956
01:56:00	5.08056	55.427
02:06:00	5.0875	53.171
02:16:00	5.09444	56.295
02:26:00	5.10139	54.72
02:36:00	5.10833	55.636
02:46:00	5.11528	54.149
02:56:00	5.12222	54.975
03:06:00	5.12917	54.681
03:16:00	5.13611	54.845
03:26:00	5.14306	56.016
03:36:00	5.15	54.1
03:46:00	5.15694	54.739
03:56:00	5.16389	55.296
04:06:00	5.17083	54.837
04:16:00	5.17778	55.018
04:26:00	5.18472	54.631
04:36:00	5.19167	55.392
04:46:00	5.19861	53.413
04:56:00	5.20556	55.827
05:06:00	5.2125	54.587
05:16:00	5.21944	55.079
05:26:00	5.22639	55.839
05:36:00	5.23333	55.17
05:46:00	5.24028	55.472
05:56:00	5.24722	53.959
06:06:00	5.25417	53.418
06:16:00	5.26111	55.71
06:26:00	5.26806	54.417
06:36:00	5.275	54.155
06:46:00	5.28194	56.443
06:56:00	5.28889	55.042
07:06:00	5.29583	56.045
07:16:00	5.30278	54.787
07:26:00	5.30972	55.153
07:36:00	5.31667	54.34
07:46:00	5.32361	54.585
07:56:00	5.33056	54.307
08:06:00	5.3375	54.494
08:16:00	5.34444	56.589
08:26:00	5.35139	56.904
08:36:00	5.35833	56.268
08:46:00	5.36528	56.251
08:56:00	5.37222	54.988
09:06:00	5.37917	54.974
09:16:00	5.38611	55.344
09:26:00	5.39306	55.534
09:36:00	5.4	54.303
09:46:00	5.40694	53.454
09:56:00	5.41389	55.514
10:06:00	5.42083	54.824
10:16:00	5.42778	55.883
10:26:00	5.43472	53.935
10:36:00	5.44167	54.122
10:46:00	5.44861	52.834
10:56:00	5.45556	53.508
11:06:00	5.4625	53.815
11:16:00	5.46944	54.342
11:26:00	5.47639	53.52
11:36:00	5.48333	55.172
11:46:00	5.49028	54.991
11:56:00	5.49722	54.661
12:06:00	5.50417	55.744
12:16:00	5.51111	55.392
12:26:00	5.51806	54.283
12:36:00	5.525	53.764
12:46:00	5.53194	54.167
12:56:00	5.53889	56.529
13:06:00	5.54583	55.629
13:16:00	5.55278	55.343
13:26:00	5.55972	53.067
13:36:00	5.56667	57.709
13:46:00	5.57361	54.018
13:56:00	5.58056	54.87
14:06:00	5.5875	54.015
14:16:00	5.59444	54.465
14:26:00	5.60139	54.367
14:36:00	5.60833	52.441
14:46:00	5.61528	52.54
14:56:00	5.62222	54.791
15:06:00	5.62917	55.333
15:16:00	5.63611	54.808
15:26:00	5.64306	54.336
15:36:00	5.65	53.83
15:46:00	5.65694	53.798
15:56:00	5.66389	52.641
16:06:00	5.67083	53.688
16:16:00	5.67778	54.455
16:26:00	5.68472	56.395
16:36:00	5.69167	54.725
16:46:00	5.69861	54.323
16:56:00	5.70556	54.327
17:06:00	5.7125	53.789
17:16:00	5.71944	53.657
17:26:00	5.72639	53.505
17:36:00	5.73333	53.732
17:46:00	5.74028	54.512
17:56:00	5.74722	54.175
18:06:00	5.75417	54.491
18:16:00	5.76111	54.686
18:26:00	5.76806	53.44
18:36:00	5.775	53.975
18:46:00	5.78194	55.964
18:56:00	5.78889	52.81
19:06:00	5.79583	53.589
19:16:00	5.80278	54.21
19:26:00	5.80972	53.382
19:36:00	5.81667	53.874
19:46:00	5.82361	53.474
19:56:00	5.83056	53.43
20:06:00	5.8375	53.336
20:16:00	5.84444	52.444
20:26:00	5.85139	55.83
20:36:00	5.85833	54.447
20:46:00	5.86528	54.056
20:56:00	5.87222	52.145
21:06:00	5.87917	54.415
21:16:00	5.88611	53.655
21:26:00	5.89306	51.411
21:36:00	5.9	54.169
21:46:00	5.90694	53.07
21:56:00	5.91389	53.493
22:06:00	5.92083	54.563
22:16:00	5.92778	54.635
22:26:00	5.93472	53.89
22:36:00	5.94167	53.077
22:46:00	5.94861	53.324
22:56:00	5.95556	55.113
23:06:00	5.9625	52.596
23:16:00	5.96944	53.965
23:26:00	5.97639	52.811
23:36:00	5.98333	52.913
23:46:00	5.99028	53.572
23:56:00	5.99722	53.308
00:06:00	6.00417	54.118
00:16:00	6.01111	53.655
00:26:00	6.01806	52.756
00:36:00	6.025	53.011
00:46:00	6.03194	53.199
00:56:00	6.03889	52.042
01:06:00	6.04583	51.901
01:16:00	6.05278	53.092
01:26:00	6.05972	55.481
01:36:00	6.06667	54.13
01:46:00	6.07361	53.122
01:56:00	6.08056	50.853
02:06:00	6.0875	54.066
02:16:00	6.09444	53.806
02:26:00	6.10139	52.984
02:36:00	6.10833	53.968
02:46:00	6.11528	52.731
02:56:00	6.12222	51.39
03:06:00	6.12917	52.915
03:16:00	6.13611	53.9
03:26:00	6.14306	52.178
03:36:00	6.15	53.641
03:46:00	6.15694	51.568
03:56:00	6.16389	53.455
04:06:00	6.17083	53.458
04:16:00	6.17778	52.376
04:26:00	6.18472	51.558
04:36:00	6.19167	52.81
04:46:00	6.19861	54.999
04:56:00	6.20556	52.473
05:06:00	6.2125	53.548
05:16:00	6.21944	53.705
05:26:00	6.22639	52.995
05:36:00	6.23333	56.335
05:46:00	6.24028	52.012
05:56:00	6.24722	54.753
06:06:00	6.25417	53.217
06:16:00	6.26111	53.595
06:26:00	6.26806	55.38
06:36:00	6.275	54.008
06:46:00	6.28194	54.389
06:56:00	6.28889	52.654
07:06:00	6.29583	52.801
07:16:00	6.30278	52.614
07:26:00	6.30972	54.838
07:36:00	6.31667	53.769
07:46:00	6.32361	53.173
07:56:00	6.33056	53.801
08:06:00	6.3375	54.323
08:16:00	6.34444	54.446
08:26:00	6.35139	53.105
08:36:00	6.35833	52.666
08:46:00	6.36528	51.41
08:56:00	6.37222	54.461
09:06:00	6.37917	53.816
09:16:00	6.38611	53.411
09:26:00	6.39306	52.835
09:36:00	6.4	53.955
09:46:00	6.40694	53.196
09:56:00	6.41389	54.238
10:06:00	6.42083	53.618
10:16:00	6.42778	53.11
10:26:00	6.43472	54.22
10:36:00	6.44167	54.694
10:46:00	6.44861	54.607
10:56:00	6.45556	53.503
11:06:00	6.4625	53.244
11:16:00	6.46944	53.953
11:26:00	6.47639	53.799
11:36:00	6.48333	53.559
11:46:00	6.49028	53.476
11:56:00	6.49722	55.102
12:06:00	6.50417	54
12:16:00	6.51111	53.863
12:26:00	6.51806	54.016
12:36:00	6.525	54.13
12:46:00	6.53194	52.176
12:56:00	6.53889	54.402
13:06:00	6.54583	54.946
13:16:00	6.55278	52.408
13:26:00	6.55972	53.846
13:36:00	6.56667	54.959
13:46:00	6.57361	53.668
13:56:00	6.58056	53.831
14:06:00	6.5875	53.87
14:16:00	6.59444	54.522
14:26:00	6.60139	54.025
14:36:00	6.60833	51.95
14:46:00	6.61528	52.496
14:56:00	6.62222	54.66
15:06:00	6.62917	55.761
15:16:00	6.63611	55.175
15:26:00	6.64306	54.631
15:36:00	6.65	53.008
15:46:00	6.65694	53.312
15:56:00	6.66389	53.327
16:06:00	6.67083	53.961
16:16:00	6.67778	54.662
16:26:00	6.68472	50.526
16:36:00	6.69167	51.976
16:46:00	6.69861	54.189
16:56:00	6.70556	52.12
17:06:00	6.7125	53.29
17:16:00	6.71944	55
17:26:00	6.72639	52.388
17:36:00	6.73333	54.652
17:46:00	6.74028	52.981
17:56:00	6.74722	53.593
18:06:00	6.75417	54.366
18:16:00	6.76111	55.376
18:26:00	6.76806	54.281
18:36:00	6.775	53.349
18:46:00	6.78194	52.318
18:56:00	6.78889	53.659
19:06:00	6.79583	52.573
19:16:00	6.80278	53.426
19:26:00	6.80972	55.499
19:36:00	6.81667	53.049
19:46:00	6.82361	53.653
19:56:00	6.83056	52.986
20:06:00	6.8375	52.459
20:16:00	6.84444	54.068
20:26:00	6.85139	53.256
20:36:00	6.85833	54.737
20:46:00	6.86528	52.887
20:56:00	6.87222	52.907
21:06:00	6.87917	53.238
21:16:00	6.88611	51.949
21:26:00	6.89306	53.981
21:36:00	6.9	53.063
21:46:00	6.90694	54.699
21:56:00	6.91389	53.796
22:06:00	6.92083	54.122
22:16:00	6.92778	52.969
22:26:00	6.93472	54.235
22:36:00	6.94167	52.66
22:46:00	6.94861	54.219
22:56:00	6.95556	52.037
23:06:00	6.9625	51.2
23:16:00	6.96944	52.954
23:26:00	6.97639	54.002
23:36:00	6.98333	50.935
23:46:00	6.99028	53.814
23:56:00	6.99722	55.37
00:06:00	7.00417	54.026
00:16:00	7.01111	55.118
00:26:00	7.01806	52.244
00:36:00	7.025	55.1
00:46:00	7.03194	54.505
00:56:00	7.03889	52.891
01:06:00	7.04583	52.681
01:16:00	7.05278	52.484
01:26:00	7.05972	53.327
01:36:00	7.06667	52.468
01:46:00	7.07361	51.67
01:56:00	7.08056	53.583
02:06:00	7.0875	55.834
02:16:00	7.09444	53.257
02:26:00	7.10139	51.298
02:36:00	7.10833	53.006
02:46:00	7.11528	50.983
02:56:00	7.12222	52.891
03:06:00	7.12917	54.116
03:16:00	7.13611	52.438
03:26:00	7.14306	54.586
03:36:00	7.15	52.435
