# Supplementary material for: The nutrient-sensing GCN2 signaling pathway is essential for circadian clock function by regulating histone acetylation under amino acid starvation
Source: eLife journal article supplement (doi:10.7554/elife.85241), 2023-04-21
Supplement: fig1-figsupp2-data2 [file Figure 1-figure supplement 2-source data 2.xlsx]

## Sheet: WT-raw data
LumiCycle: WT-frq-luc (Raw)
Time (hr:min)	Time (days)	counts/sec
23:48:00	0.99167	7162.85
23:58:00	0.99861	7011.71
00:08:00	1.00556	6848.3
00:18:00	1.0125	6683.51
00:28:00	1.01944	6456.75
00:38:00	1.02639	6317.52
00:48:00	1.03333	6118.74
00:58:00	1.04028	6003.92
01:08:00	1.04722	5848.49
01:18:00	1.05417	5714.16
01:28:00	1.06111	5605.22
01:38:00	1.06806	5418.96
01:48:00	1.075	5302.37
01:58:00	1.08194	5233.14
02:08:00	1.08889	5086.36
02:18:00	1.09583	4992.67
02:28:00	1.10278	4896.27
02:38:00	1.10972	4802.65
02:48:00	1.11667	4700.78
02:58:00	1.12361	4587.64
03:08:00	1.13056	4492.33
03:18:00	1.1375	4391.62
03:28:00	1.14444	4323.09
03:38:00	1.15139	4293.82
03:48:00	1.15833	4208.83
03:58:00	1.16528	4132.55
04:08:00	1.17222	4055.41
04:18:00	1.17917	4009.39
04:28:00	1.18611	3930.28
04:38:00	1.19306	3874.2
04:48:00	1.2	3820.14
04:58:00	1.20694	3773.61
05:08:00	1.21389	3723.86
05:18:00	1.22083	3652.52
05:28:00	1.22778	3651.78
05:38:00	1.23472	3600.57
05:48:00	1.24167	3529.13
05:58:00	1.24861	3477.36
06:08:00	1.25556	3450.33
06:18:00	1.2625	3418.4
06:28:00	1.26944	3426.13
06:38:00	1.27639	3352.65
06:48:00	1.28333	3344.47
06:58:00	1.29028	3311.65
07:08:00	1.29722	3280.28
07:18:00	1.30417	3249.65
07:28:00	1.31111	3253
07:38:00	1.31806	3226.52
07:48:00	1.325	3209.34
07:58:00	1.33194	3205.95
08:08:00	1.33889	3206.41
08:18:00	1.34583	3189.01
08:28:00	1.35278	3159.04
08:38:00	1.35972	3177.55
08:48:00	1.36667	3198.9
08:58:00	1.37361	3210.49
09:08:00	1.38056	3193.01
09:18:00	1.3875	3214.04
09:28:00	1.39444	3228.87
09:38:00	1.40139	3242.48
09:48:00	1.40833	3266.16
09:58:00	1.41528	3310.12
10:08:00	1.42222	3328.56
10:18:00	1.42917	3349.57
10:28:00	1.43611	3422.49
10:38:00	1.44306	3439.16
10:48:00	1.45	3492.52
10:58:00	1.45694	3544.93
11:08:00	1.46389	3582.24
11:18:00	1.47083	3647.86
11:28:00	1.47778	3721.26
11:38:00	1.48472	3778.82
11:48:00	1.49167	3853.48
11:58:00	1.49861	3934.79
12:08:00	1.50556	4014.22
12:18:00	1.5125	4069.18
12:28:00	1.51944	4164.79
12:38:00	1.52639	4248.52
12:48:00	1.53333	4343.95
12:58:00	1.54028	4427.59
13:08:00	1.54722	4515.34
13:18:00	1.55417	4619.19
13:28:00	1.56111	4702.79
13:38:00	1.56806	4782.33
13:48:00	1.575	4915.76
13:58:00	1.58194	4997.52
14:08:00	1.58889	5098.27
14:18:00	1.59583	5178.25
14:28:00	1.60278	5259.29
14:38:00	1.60972	5336.9
14:48:00	1.61667	5446.45
14:58:00	1.62361	5545.57
15:08:00	1.63056	5627.94
15:18:00	1.6375	5696.74
15:28:00	1.64444	5773.16
15:38:00	1.65139	5876.83
15:48:00	1.65833	5943.23
15:58:00	1.66528	6027.92
16:08:00	1.67222	6074.25
16:18:00	1.67917	6153.66
16:28:00	1.68611	6244.14
16:38:00	1.69306	6283.56
16:48:00	1.7	6322.08
16:58:00	1.70694	6379.47
17:08:00	1.71389	6413.27
17:18:00	1.72083	6433.37
17:28:00	1.72778	6460.72
17:38:00	1.73472	6504.62
17:48:00	1.74167	6544.66
17:58:00	1.74861	6549.11
18:08:00	1.75556	6538.76
18:18:00	1.7625	6556.16
18:28:00	1.76944	6554.05
18:38:00	1.77639	6547
18:48:00	1.78333	6534.81
18:58:00	1.79028	6528.99
19:08:00	1.79722	6516.05
19:18:00	1.80417	6520.39
19:28:00	1.81111	6504.31
19:38:00	1.81806	6448.03
19:48:00	1.825	6436.74
19:58:00	1.83194	6394.62
20:08:00	1.83889	6395.01
20:18:00	1.84583	6347.11
20:28:00	1.85278	6339
20:38:00	1.85972	6281.83
20:48:00	1.86667	6238.46
20:58:00	1.87361	6231.66
21:08:00	1.88056	6180.06
21:18:00	1.8875	6144.01
21:28:00	1.89444	6131.74
21:38:00	1.90139	6110.78
21:48:00	1.90833	6083.41
21:58:00	1.91528	6015.93
22:08:00	1.92222	5978.52
22:18:00	1.92917	5953.12
22:28:00	1.93611	5925.47
22:38:00	1.94306	5925.8
22:48:00	1.95	5884.43
22:58:00	1.95694	5837.91
23:08:00	1.96389	5838.84
23:18:00	1.97083	5820.22
23:28:00	1.97778	5784.46
23:38:00	1.98472	5746.1
23:48:00	1.99167	5719.47
23:58:00	1.99861	5717.74
00:08:00	2.00556	5666.78
00:18:00	2.0125	5682.43
00:28:00	2.01944	5662.44
00:38:00	2.02639	5619.24
00:48:00	2.03333	5603.12
00:58:00	2.04028	5586.29
01:08:00	2.04722	5558.1
01:18:00	2.05417	5554.6
01:28:00	2.06111	5524.06
01:38:00	2.06806	5522.65
01:48:00	2.075	5489.7
01:58:00	2.08194	5488.61
02:08:00	2.08889	5483.49
02:18:00	2.09583	5436.11
02:28:00	2.10278	5436.14
02:38:00	2.10972	5434.05
02:48:00	2.11667	5411.98
02:58:00	2.12361	5399.82
03:08:00	2.13056	5376.34
03:18:00	2.1375	5355.04
03:28:00	2.14444	5378
03:38:00	2.15139	5364.06
03:48:00	2.15833	5340.66
03:58:00	2.16528	5325.04
04:08:00	2.17222	5310.66
04:18:00	2.17917	5310.15
04:28:00	2.18611	5295.25
04:38:00	2.19306	5291.6
04:48:00	2.2	5310.15
04:58:00	2.20694	5296.3
05:08:00	2.21389	5286.12
05:18:00	2.22083	5282.7
05:28:00	2.22778	5272.32
05:38:00	2.23472	5301.24
05:48:00	2.24167	5289.97
05:58:00	2.24861	5285.06
06:08:00	2.25556	5300.26
06:18:00	2.2625	5318.93
06:28:00	2.26944	5339.64
06:38:00	2.27639	5352.09
06:48:00	2.28333	5360.15
06:58:00	2.29028	5384.84
07:08:00	2.29722	5410.87
07:18:00	2.30417	5439.42
07:28:00	2.31111	5471.94
07:38:00	2.31806	5507.38
07:48:00	2.325	5586.77
07:58:00	2.33194	5641.79
08:08:00	2.33889	5667.8
08:18:00	2.34583	5751.46
08:28:00	2.35278	5807.07
08:38:00	2.35972	5859.77
08:48:00	2.36667	5940.96
08:58:00	2.37361	6029.38
09:08:00	2.38056	6109.47
09:18:00	2.3875	6200.55
09:28:00	2.39444	6283.82
09:38:00	2.40139	6381.98
09:48:00	2.40833	6459.92
09:58:00	2.41528	6621.63
10:08:00	2.42222	6722.54
10:18:00	2.42917	6860.79
10:28:00	2.43611	6989.81
10:38:00	2.44306	7099.1
10:48:00	2.45	7228.15
10:58:00	2.45694	7384.41
11:08:00	2.46389	7539.84
11:18:00	2.47083	7680.09
11:28:00	2.47778	7820.26
11:38:00	2.48472	7988.02
11:48:00	2.49167	8140.46
11:58:00	2.49861	8284.03
12:08:00	2.50556	8437.01
12:18:00	2.5125	8592.11
12:28:00	2.51944	8724.28
12:38:00	2.52639	8872.31
12:48:00	2.53333	8999.84
12:58:00	2.54028	9165.98
13:08:00	2.54722	9354.66
13:18:00	2.55417	9473.33
13:28:00	2.56111	9590.31
13:38:00	2.56806	9736.79
13:48:00	2.575	9869.12
13:58:00	2.58194	9988.27
14:08:00	2.58889	10055.4
14:18:00	2.59583	10236.9
14:28:00	2.60278	10307.2
14:38:00	2.60972	10404.6
14:48:00	2.61667	10480.9
14:58:00	2.62361	10528.9
15:08:00	2.63056	10633.4
15:18:00	2.6375	10661.1
15:28:00	2.64444	10656.2
15:38:00	2.65139	10739.6
15:48:00	2.65833	10777.4
15:58:00	2.66528	10768.5
16:08:00	2.67222	10814.4
16:18:00	2.67917	10811.9
16:28:00	2.68611	10780.1
16:38:00	2.69306	10752.5
16:48:00	2.7	10697.3
16:58:00	2.70694	10662.6
17:08:00	2.71389	10586.6
17:18:00	2.72083	10571
17:28:00	2.72778	10477.9
17:38:00	2.73472	10472.7
17:48:00	2.74167	10374.4
17:58:00	2.74861	10275.1
18:08:00	2.75556	10162.3
18:18:00	2.7625	10094.6
18:28:00	2.76944	9993.14
18:38:00	2.77639	9929.14
18:48:00	2.78333	9782.02
18:58:00	2.79028	9696.79
19:08:00	2.79722	9562.5
19:18:00	2.80417	9444.02
19:28:00	2.81111	9346.19
19:38:00	2.81806	9233.25
19:48:00	2.825	9108.21
19:58:00	2.83194	8987.71
20:08:00	2.83889	8875.02
20:18:00	2.84583	8782.31
20:28:00	2.85278	8682.57
20:38:00	2.85972	8533.57
20:48:00	2.86667	8427.97
20:58:00	2.87361	8346.09
21:08:00	2.88056	8200.4
21:18:00	2.8875	8068.3
21:28:00	2.89444	8009.89
21:38:00	2.90139	7888.93
21:48:00	2.90833	7770.41
21:58:00	2.91528	7661.84
22:08:00	2.92222	7585.26
22:18:00	2.92917	7518.81
22:28:00	2.93611	7472.49
22:38:00	2.94306	7369.3
22:48:00	2.95	7297.32
22:58:00	2.95694	7186.08
23:08:00	2.96389	7159.12
23:18:00	2.97083	7070.54
23:28:00	2.97778	7014.82
23:38:00	2.98472	6958.59
23:48:00	2.99167	6903.55
23:58:00	2.99861	6834.37
00:08:00	3.00556	6810.75
00:18:00	3.0125	6745.11
00:28:00	3.01944	6673.14
00:38:00	3.02639	6650.52
00:48:00	3.03333	6619.76
00:58:00	3.04028	6591
01:08:00	3.04722	6539.87
01:18:00	3.05417	6548.98
01:28:00	3.06111	6524.34
01:38:00	3.06806	6473.25
01:48:00	3.075	6466.05
01:58:00	3.08194	6481.46
02:08:00	3.08889	6481.52
02:18:00	3.09583	6449.89
02:28:00	3.10278	6459.23
02:38:00	3.10972	6416.18
02:48:00	3.11667	6495.21
02:58:00	3.12361	6517.95
03:08:00	3.13056	6484.91
03:18:00	3.1375	6488.26
03:28:00	3.14444	6525.74
03:38:00	3.15139	6542.09
03:48:00	3.15833	6551.44
03:58:00	3.16528	6587.94
04:08:00	3.17222	6670.58
04:18:00	3.17917	6748.49
04:28:00	3.18611	6779.51
04:38:00	3.19306	6877.39
04:48:00	3.2	6915.82
04:58:00	3.20694	6999.9
05:08:00	3.21389	7050.64
05:18:00	3.22083	7197.85
05:28:00	3.22778	7248.76
05:38:00	3.23472	7271.97
05:48:00	3.24167	7441.3
05:58:00	3.24861	7538.8
06:08:00	3.25556	7665.9
06:18:00	3.2625	7798.02
06:28:00	3.26944	7934.7
06:38:00	3.27639	8155.03
06:48:00	3.28333	8323.3
06:58:00	3.29028	8491.63
07:08:00	3.29722	8682.44
07:18:00	3.30417	8784.69
07:28:00	3.31111	9003.24
07:38:00	3.31806	9178.6
07:48:00	3.325	9311.22
07:58:00	3.33194	9559.82
08:08:00	3.33889	9819.84
08:18:00	3.34583	10064.7
08:28:00	3.35278	10371.3
08:38:00	3.35972	10671.5
08:48:00	3.36667	10891.8
08:58:00	3.37361	11221.5
09:08:00	3.38056	11501.1
09:18:00	3.3875	11752.9
09:28:00	3.39444	11999.4
09:38:00	3.40139	12236.9
09:48:00	3.40833	12527.4
09:58:00	3.41528	12790.7
10:08:00	3.42222	13139.7
10:18:00	3.42917	13509.1
10:28:00	3.43611	13673.5
10:38:00	3.44306	13875.2
10:48:00	3.45	14316.2
10:58:00	3.45694	14499.6
11:08:00	3.46389	14757.3
11:18:00	3.47083	15055.9
11:28:00	3.47778	15286.3
11:38:00	3.48472	15548.7
11:48:00	3.49167	15625.2
11:58:00	3.49861	15922.8
12:08:00	3.50556	16180.4
12:18:00	3.5125	16451.6
12:28:00	3.51944	16540.3
12:38:00	3.52639	16719.3
12:48:00	3.53333	16895.1
12:58:00	3.54028	16973.8
13:08:00	3.54722	17156.6
13:18:00	3.55417	17248.3
13:28:00	3.56111	17283.4
13:38:00	3.56806	17331.5
13:48:00	3.575	17439.3
13:58:00	3.58194	17394.1
14:08:00	3.58889	17454.7
14:18:00	3.59583	17414.9
14:28:00	3.60278	17392.2
14:38:00	3.60972	17373.2
14:48:00	3.61667	17261
14:58:00	3.62361	17167.7
15:08:00	3.63056	17132.2
15:18:00	3.6375	16970.3
15:28:00	3.64444	16851.7
15:38:00	3.65139	16747.4
15:48:00	3.65833	16704.4
15:58:00	3.66528	16521.8
16:08:00	3.67222	16441.3
16:18:00	3.67917	16185.8
16:28:00	3.68611	16056.2
16:38:00	3.69306	15895.5
16:48:00	3.7	15780.4
16:58:00	3.70694	15422
17:08:00	3.71389	15276.6
17:18:00	3.72083	15030.7
17:28:00	3.72778	14744.9
17:38:00	3.73472	14594.9
17:48:00	3.74167	14381.9
17:58:00	3.74861	14187.3
18:08:00	3.75556	13999.4
18:18:00	3.7625	13778.2
18:28:00	3.76944	13671.8
18:38:00	3.77639	13479.5
18:48:00	3.78333	13262.2
18:58:00	3.79028	13183.3
19:08:00	3.79722	12883.2
19:18:00	3.80417	12772.5
19:28:00	3.81111	12574.2
19:38:00	3.81806	12361.6
19:48:00	3.825	12153.7
19:58:00	3.83194	12011.6
20:08:00	3.83889	11852
20:18:00	3.84583	11676.3
20:28:00	3.85278	11590.3
20:38:00	3.85972	11589.1
20:48:00	3.86667	11398
20:58:00	3.87361	11268.2
21:08:00	3.88056	11089.7
21:18:00	3.8875	10972.3
21:28:00	3.89444	10850.7
21:38:00	3.90139	10720.5
21:48:00	3.90833	10712.8
21:58:00	3.91528	10592.2
22:08:00	3.92222	10506.3
22:18:00	3.92917	10455.8
22:28:00	3.93611	10403.9
22:38:00	3.94306	10295.9
22:48:00	3.95	10175.8
22:58:00	3.95694	10203.5
23:08:00	3.96389	10095.9
23:18:00	3.97083	10012.4
23:28:00	3.97778	9990.62
23:38:00	3.98472	9948.69
23:48:00	3.99167	9904.97
23:58:00	3.99861	9844.5
00:08:00	4.00556	9838.23
00:18:00	4.0125	9850.02
00:28:00	4.01944	9794.3
00:38:00	4.02639	9839.86
00:48:00	4.03333	9823.42
00:58:00	4.04028	9892.41
01:08:00	4.04722	9944.85
01:18:00	4.05417	9875.44
01:28:00	4.06111	9887.83
01:38:00	4.06806	9889
01:48:00	4.075	9955.44
01:58:00	4.08194	10019
02:08:00	4.08889	10037.6
02:18:00	4.09583	10089.7
02:28:00	4.10278	10193.1
02:38:00	4.10972	10323.2
02:48:00	4.11667	10399
02:58:00	4.12361	10469.7
03:08:00	4.13056	10553.1
03:18:00	4.1375	10707.8
03:28:00	4.14444	10787.5
03:38:00	4.15139	10967.7
03:48:00	4.15833	11150.4
03:58:00	4.16528	11309.5
04:08:00	4.17222	11510.1
04:18:00	4.17917	11709.8
04:28:00	4.18611	11897.3
04:38:00	4.19306	12141.2
04:48:00	4.2	12267.5
04:58:00	4.20694	12543.6
05:08:00	4.21389	12817.3
05:18:00	4.22083	13176.7
05:28:00	4.22778	13357.6
05:38:00	4.23472	13704.1
05:48:00	4.24167	13972.1
05:58:00	4.24861	14307.9
06:08:00	4.25556	14643.8
06:18:00	4.2625	14873.2
06:28:00	4.26944	15139.8
06:38:00	4.27639	15470.3
06:48:00	4.28333	15916.2
06:58:00	4.29028	16232.2
07:08:00	4.29722	16785.6
07:18:00	4.30417	16940.4
07:28:00	4.31111	17337.6
07:38:00	4.31806	17704
07:48:00	4.325	18020.1
07:58:00	4.33194	18341.5
08:08:00	4.33889	18755.9
08:18:00	4.34583	18954.6
08:28:00	4.35278	19344.1
08:38:00	4.35972	19642.2
08:48:00	4.36667	19834.7
08:58:00	4.37361	20211.5
09:08:00	4.38056	20602.9
09:18:00	4.3875	20806.4
09:28:00	4.39444	20998.4
09:38:00	4.40139	21208.8
09:48:00	4.40833	21442.3
09:58:00	4.41528	21704.2
10:08:00	4.42222	21943.8
10:18:00	4.42917	22263.3
10:28:00	4.43611	22274.9
10:38:00	4.44306	22530.8
10:48:00	4.45	22484.2
10:58:00	4.45694	22524.8
11:08:00	4.46389	22652.9
11:18:00	4.47083	22665.9
11:28:00	4.47778	22802.7
11:38:00	4.48472	22698.4
11:48:00	4.49167	22589.4
11:58:00	4.49861	22519.6
12:08:00	4.50556	22444.7
12:18:00	4.5125	22534.4
12:28:00	4.51944	22282.2
12:38:00	4.52639	22279.9
12:48:00	4.53333	22144.5
12:58:00	4.54028	21823.4
13:08:00	4.54722	21652.2
13:18:00	4.55417	21507.2
13:28:00	4.56111	21302.2
13:38:00	4.56806	21158.3
13:48:00	4.575	20911.4
13:58:00	4.58194	20699.8
14:08:00	4.58889	20456.3
14:18:00	4.59583	20096.5
14:28:00	4.60278	19880.3
14:38:00	4.60972	19577
14:48:00	4.61667	19436.4
14:58:00	4.62361	19255.6
15:08:00	4.63056	18942.1
15:18:00	4.6375	18427
15:28:00	4.64444	18208.9
15:38:00	4.65139	18017.7
15:48:00	4.65833	17715
15:58:00	4.66528	17561.4
16:08:00	4.67222	17258.7
16:18:00	4.67917	16988.9
16:28:00	4.68611	16690.5
16:38:00	4.69306	16459.6
16:48:00	4.7	16218.3
16:58:00	4.70694	15967.9
17:08:00	4.71389	15645.6
17:18:00	4.72083	15366.5
17:28:00	4.72778	15230.7
17:38:00	4.73472	15023.5
17:48:00	4.74167	14797.4
17:58:00	4.74861	14569.3
18:08:00	4.75556	14371.1
18:18:00	4.7625	14164.8
18:28:00	4.76944	13953.9
18:38:00	4.77639	13810.5
18:48:00	4.78333	13647.2
18:58:00	4.79028	13473.1
19:08:00	4.79722	13240
19:18:00	4.80417	13082.1
19:28:00	4.81111	12940.6
19:38:00	4.81806	12835.1
19:48:00	4.825	12650.5
19:58:00	4.83194	12456
20:08:00	4.83889	12400
20:18:00	4.84583	12438.9
20:28:00	4.85278	12276.7
20:38:00	4.85972	12165.5
20:48:00	4.86667	12044.3
20:58:00	4.87361	11954.2
21:08:00	4.88056	11941.1
21:18:00	4.8875	11825
21:28:00	4.89444	11780.5
21:38:00	4.90139	11705.4
21:48:00	4.90833	11641
21:58:00	4.91528	11588.2
22:08:00	4.92222	11550.7
22:18:00	4.92917	11534
22:28:00	4.93611	11443.3
22:38:00	4.94306	11500
22:48:00	4.95	11439.4
22:58:00	4.95694	11502.7
23:08:00	4.96389	11535.9
23:18:00	4.97083	11526.1
23:28:00	4.97778	11573.6
23:38:00	4.98472	11516.3
23:48:00	4.99167	11541.7
23:58:00	4.99861	11727.6
00:08:00	5.00556	11684.8
00:18:00	5.0125	11802
00:28:00	5.01944	11922.9
00:38:00	5.02639	12007.6
00:48:00	5.03333	12066.2
00:58:00	5.04028	12223.6
01:08:00	5.04722	12346.8
01:18:00	5.05417	12493.9
01:28:00	5.06111	12554.1
01:38:00	5.06806	12729.2
01:48:00	5.075	12932.8
01:58:00	5.08194	13176.9
02:08:00	5.08889	13359.2
02:18:00	5.09583	13562.6
02:28:00	5.10278	13760.6
02:38:00	5.10972	14019.2
02:48:00	5.11667	14345.1
02:58:00	5.12361	14645
03:08:00	5.13056	14863.4
03:18:00	5.1375	15162.7
03:28:00	5.14444	15430.4
03:38:00	5.15139	15703.8
03:48:00	5.15833	16085.7
03:58:00	5.16528	16431.9
04:08:00	5.17222	16664.5
04:18:00	5.17917	17054.4
04:28:00	5.18611	17393.3
04:38:00	5.19306	17824.9
04:48:00	5.2	18074.8
04:58:00	5.20694	18493.6
05:08:00	5.21389	18902.4
05:18:00	5.22083	19158.8
05:28:00	5.22778	19619.5
05:38:00	5.23472	19908.1
05:48:00	5.24167	20196.9
05:58:00	5.24861	20659.6
06:08:00	5.25556	21036.4
06:18:00	5.2625	21183.1
06:28:00	5.26944	21600.4
06:38:00	5.27639	21815.2
06:48:00	5.28333	22090.8
06:58:00	5.29028	22393.3
07:08:00	5.29722	22856.9
07:18:00	5.30417	23001.1
07:28:00	5.31111	23211.6
07:38:00	5.31806	23408.5
07:48:00	5.325	23533.5
07:58:00	5.33194	23683.3
08:08:00	5.33889	23867.9
08:18:00	5.34583	23988.4
08:28:00	5.35278	24169.2
08:38:00	5.35972	24263.6
08:48:00	5.36667	24242.1
08:58:00	5.37361	24395.9
09:08:00	5.38056	24352.9
09:18:00	5.3875	24319.3
09:28:00	5.39444	24375.4
09:38:00	5.40139	24296
09:48:00	5.40833	24184.5
09:58:00	5.41528	24155.2
10:08:00	5.42222	24104.9
10:18:00	5.42917	23881.3
10:28:00	5.43611	23724
10:38:00	5.44306	23929.3
10:48:00	5.45	23496.2
10:58:00	5.45694	23365.5
11:08:00	5.46389	23282.4
11:18:00	5.47083	22906.9
11:28:00	5.47778	22689.4
11:38:00	5.48472	22481.5
11:48:00	5.49167	22331.1
11:58:00	5.49861	22096.5
12:08:00	5.50556	21842.9
12:18:00	5.5125	21569.9
12:28:00	5.51944	21411.1
12:38:00	5.52639	21198.7
12:48:00	5.53333	20854.9
12:58:00	5.54028	20348.6
13:08:00	5.54722	20268.5
13:18:00	5.55417	19915
13:28:00	5.56111	19667.6
13:38:00	5.56806	19263.1
13:48:00	5.575	18966.2
13:58:00	5.58194	18703.8
14:08:00	5.58889	18626.6
14:18:00	5.59583	18202
14:28:00	5.60278	18037.8
14:38:00	5.60972	17739.3
14:48:00	5.61667	17373.2
14:58:00	5.62361	17148.7
15:08:00	5.63056	16821.9
15:18:00	5.6375	16622.6
15:28:00	5.64444	16323.2
15:38:00	5.65139	16196.4
15:48:00	5.65833	15901
15:58:00	5.66528	15724.6
16:08:00	5.67222	15536.9
16:18:00	5.67917	15382.9
16:28:00	5.68611	15242.5
16:38:00	5.69306	14975.1
16:48:00	5.7	14908.6
16:58:00	5.70694	14646.7
17:08:00	5.71389	14483
17:18:00	5.72083	14342.3
17:28:00	5.72778	14164.1
17:38:00	5.73472	14054
17:48:00	5.74167	13930.6
17:58:00	5.74861	13740.8
18:08:00	5.75556	13749.9
18:18:00	5.7625	13521.7
18:28:00	5.76944	13467.5
18:38:00	5.77639	13242.7
18:48:00	5.78333	13296.2
18:58:00	5.79028	13110.5
19:08:00	5.79722	12965.6
19:18:00	5.80417	12984
19:28:00	5.81111	12928.9
19:38:00	5.81806	12841.1
19:48:00	5.825	12865.8
19:58:00	5.83194	12837.9
20:08:00	5.83889	12791.3
20:18:00	5.84583	12740.3
20:28:00	5.85278	12766.4
20:38:00	5.85972	12775.5
20:48:00	5.86667	12767.8
20:58:00	5.87361	12778.1
21:08:00	5.88056	12718.8
21:18:00	5.8875	12803.7
21:28:00	5.89444	12842
21:38:00	5.90139	12914.3
21:48:00	5.90833	12845
21:58:00	5.91528	12959.3
22:08:00	5.92222	13067.9
22:18:00	5.92917	13076.6
22:28:00	5.93611	13262.1
22:38:00	5.94306	13333.5
22:48:00	5.95	13472.2
22:58:00	5.95694	13586.3
23:08:00	5.96389	13760.3
23:18:00	5.97083	13848
23:28:00	5.97778	14077.4
23:38:00	5.98472	14177.2
23:48:00	5.99167	14343.5
23:58:00	5.99861	14681.9
00:08:00	6.00556	14791.5
00:18:00	6.0125	15031.3
00:28:00	6.01944	15406.9
00:38:00	6.02639	15638.2
00:48:00	6.03333	15788.6
00:58:00	6.04028	16066.6
01:08:00	6.04722	16374.5
01:18:00	6.05417	16626.1
01:28:00	6.06111	16941.3
01:38:00	6.06806	17323
01:48:00	6.075	17579.1
01:58:00	6.08194	17792.9
02:08:00	6.08889	18228
02:18:00	6.09583	18614.2
02:28:00	6.10278	18763.4
02:38:00	6.10972	19145.7
02:48:00	6.11667	19401.2
02:58:00	6.12361	19787.6
03:08:00	6.13056	20199.3
03:18:00	6.1375	20537.6
03:28:00	6.14444	20835
03:38:00	6.15139	21101.1
03:48:00	6.15833	21379.2
03:58:00	6.16528	21724
04:08:00	6.17222	21952.8
04:18:00	6.17917	22241.7
04:28:00	6.18611	22736.2
04:38:00	6.19306	23011.4
04:48:00	6.2	23071.4
04:58:00	6.20694	23364.5
05:08:00	6.21389	23627.3
05:18:00	6.22083	23749.4
05:28:00	6.22778	24010.1
05:38:00	6.23472	24131.2
05:48:00	6.24167	24276.3
05:58:00	6.24861	24312.2
06:08:00	6.25556	24677.1
06:18:00	6.2625	24631.7
06:28:00	6.26944	24848.6
06:38:00	6.27639	24792.9
06:48:00	6.28333	24944.2
06:58:00	6.29028	24815.8
07:08:00	6.29722	24980.6
07:18:00	6.30417	24741.2
07:28:00	6.31111	24827
07:38:00	6.31806	24774.3
07:48:00	6.325	24832.3
07:58:00	6.33194	24777.8
08:08:00	6.33889	24520.4
08:18:00	6.34583	24374.1
08:28:00	6.35278	24470.9
08:38:00	6.35972	24176.1
08:48:00	6.36667	23871.9
08:58:00	6.37361	23778.9
09:08:00	6.38056	23750.4
09:18:00	6.3875	23426.9
09:28:00	6.39444	23184.7
09:38:00	6.40139	22851.9
09:48:00	6.40833	22683
09:58:00	6.41528	22415.5
10:08:00	6.42222	22165.5
10:18:00	6.42917	22095.1
10:28:00	6.43611	21710.1
10:38:00	6.44306	21315.8
10:48:00	6.45	21124.5
10:58:00	6.45694	20850.3
11:08:00	6.46389	20668.2
11:18:00	6.47083	20364.6
11:28:00	6.47778	20069.8
11:38:00	6.48472	19867.2
11:48:00	6.49167	19659.1
11:58:00	6.49861	19231.5
12:08:00	6.50556	18967.6
12:18:00	6.5125	18664.8
12:28:00	6.51944	18430.1
12:38:00	6.52639	18262.5
12:48:00	6.53333	17875.2
12:58:00	6.54028	17711.6
13:08:00	6.54722	17442.1
13:18:00	6.55417	17139.5
13:28:00	6.56111	16991.4
13:38:00	6.56806	16686.2
13:48:00	6.575	16328.1
13:58:00	6.58194	16168.8
14:08:00	6.58889	15958.4
14:18:00	6.59583	15798.2
14:28:00	6.60278	15632.8
14:38:00	6.60972	15371.8
14:48:00	6.61667	15200.6
14:58:00	6.62361	15025.9
15:08:00	6.63056	14817.5
15:18:00	6.6375	14609.3
15:28:00	6.64444	14512
15:38:00	6.65139	14366.3
15:48:00	6.65833	14140.2
15:58:00	6.66528	13982
16:08:00	6.67222	13825.2
16:18:00	6.67917	13764.2
16:28:00	6.68611	13657.6
16:38:00	6.69306	13537.4
16:48:00	6.7	13415.5
16:58:00	6.70694	13372.7
17:08:00	6.71389	13235.1
17:18:00	6.72083	13231.5
17:28:00	6.72778	13106.4
17:38:00	6.73472	13050.8
17:48:00	6.74167	12990
17:58:00	6.74861	12946.5
18:08:00	6.75556	12879.3
18:18:00	6.7625	12887.6
18:28:00	6.76944	12797.1
18:38:00	6.77639	12851.6
18:48:00	6.78333	12735.7
18:58:00	6.79028	12751.9
19:08:00	6.79722	12807
19:18:00	6.80417	12744.7
19:28:00	6.81111	12787.1
19:38:00	6.81806	12865.1
19:48:00	6.825	12895.4
19:58:00	6.83194	13020.1
20:08:00	6.83889	12995.8
20:18:00	6.84583	13039.3
20:28:00	6.85278	13074.2
20:38:00	6.85972	13223.2
20:48:00	6.86667	13287.5
20:58:00	6.87361	13436.6
21:08:00	6.88056	13543.6
21:18:00	6.8875	13706
21:28:00	6.89444	13851.1
21:38:00	6.90139	13996.2
21:48:00	6.90833	14181.2
21:58:00	6.91528	14334.8
22:08:00	6.92222	14438.3
22:18:00	6.92917	14696.1
22:28:00	6.93611	14767.4
22:38:00	6.94306	14980.8
22:48:00	6.95	15258.7
22:58:00	6.95694	15497.7
23:08:00	6.96389	15612.8
23:18:00	6.97083	15824
23:28:00	6.97778	16113.7
23:38:00	6.98472	16342.2
23:48:00	6.99167	16577.1
23:58:00	6.99861	16666.9
00:08:00	7.00556	17066.1
00:18:00	7.0125	17252.6
00:28:00	7.01944	17499.4
00:38:00	7.02639	17836.4
00:48:00	7.03333	18109.7
00:58:00	7.04028	18272.8
01:08:00	7.04722	18537.6
01:18:00	7.05417	18768.7
01:28:00	7.06111	18964
01:38:00	7.06806	19315
01:48:00	7.075	19505.7
01:58:00	7.08194	19538.1
02:08:00	7.08889	19763.7
02:18:00	7.09583	20053.2
02:28:00	7.10278	20187.6
02:38:00	7.10972	20259.9
02:48:00	7.11667	20458.7
02:58:00	7.12361	20631.5
03:08:00	7.13056	20950.5
03:18:00	7.1375	21065.7
03:28:00	7.14444	21138.6
03:38:00	7.15139	21355
03:48:00	7.15833	21306.6
03:58:00	7.16528	21430.6
04:08:00	7.17222	21498
04:18:00	7.17917	21565
04:28:00	7.18611	21551.9
04:38:00	7.19306	21604.4
04:48:00	7.2	21745.6
04:58:00	7.20694	21629.3
05:08:00	7.21389	21517.3
05:18:00	7.22083	21513.6
05:28:00	7.22778	21511.9
05:38:00	7.23472	21470.1
05:48:00	7.24167	21407.6
05:58:00	7.24861	21398.2
06:08:00	7.25556	21222.5
06:18:00	7.2625	21114.3
06:28:00	7.26944	20966.7
06:38:00	7.27639	20948.3
06:48:00	7.28333	20780.2
06:58:00	7.29028	20646.3
07:08:00	7.29722	20490.3
07:18:00	7.30417	20324.1
07:28:00	7.31111	20203.5
07:38:00	7.31806	19873.5
07:48:00	7.325	19706
07:58:00	7.33194	19550.7
08:08:00	7.33889	19480.3
08:18:00	7.34583	19156.2
08:28:00	7.35278	19049.2
08:38:00	7.35972	18706.6
08:48:00	7.36667	18555.9
08:58:00	7.37361	18239.8
09:08:00	7.38056	18146.3
09:18:00	7.3875	17849.8
09:28:00	7.39444	17680.8
09:38:00	7.40139	17449.2
09:48:00	7.40833	17120.8
09:58:00	7.41528	16993.1
10:08:00	7.42222	16747.3
10:18:00	7.42917	16492.9
10:28:00	7.43611	16394.7
10:38:00	7.44306	16124
10:48:00	7.45	15810.9
10:58:00	7.45694	15680.4
11:08:00	7.46389	15410.3
11:18:00	7.47083	15230.2
11:28:00	7.47778	15083.7
11:38:00	7.48472	14855.7
11:48:00	7.49167	14707.4
11:58:00	7.49861	14510.5
12:08:00	7.50556	14348.4
12:18:00	7.5125	14116.9
12:28:00	7.51944	13854.2
12:38:00	7.52639	13762.2
12:48:00	7.53333	13620.3
12:58:00	7.54028	13382.1
13:08:00	7.54722	13257.9
13:18:00	7.55417	13155.1
13:28:00	7.56111	13053.9
13:38:00	7.56806	12826.9
13:48:00	7.575	12710.9
13:58:00	7.58194	12526
14:08:00	7.58889	12353
14:18:00	7.59583	12350.3
14:28:00	7.60278	12185.6
14:38:00	7.60972	12013.5
14:48:00	7.61667	11868.8
14:58:00	7.62361	11893.5
15:08:00	7.63056	11783
15:18:00	7.6375	11592.7
15:28:00	7.64444	11537.1
15:38:00	7.65139	11530.1
15:48:00	7.65833	11452.1
15:58:00	7.66528	11405.8
16:08:00	7.67222	11249.6
16:18:00	7.67917	11314.5
16:28:00	7.68611	11157.7
16:38:00	7.69306	11133
16:48:00	7.7	11117.8
16:58:00	7.70694	11078.1
17:08:00	7.71389	11121.4
17:18:00	7.72083	11044.1
17:28:00	7.72778	10979.4
17:38:00	7.73472	11021.6
17:48:00	7.74167	11056.1
17:58:00	7.74861	11005.4
18:08:00	7.75556	11091.2
18:18:00	7.7625	11079.4
18:28:00	7.76944	11082.7
18:38:00	7.77639	11175.1
18:48:00	7.78333	11187.2
18:58:00	7.79028	11161.3
19:08:00	7.79722	11270.7
19:18:00	7.80417	11350.4
19:28:00	7.81111	11294.7
19:38:00	7.81806	11427
19:48:00	7.825	11544.4
19:58:00	7.83194	11679.7
20:08:00	7.83889	11722.4
20:18:00	7.84583	11779.3
20:28:00	7.85278	11876.1
20:38:00	7.85972	12007.1
20:48:00	7.86667	12104.7
20:58:00	7.87361	12202.2
21:08:00	7.88056	12283.5
21:18:00	7.8875	12406.3
21:28:00	7.89444	12555
21:38:00	7.90139	12670.5
21:48:00	7.90833	12808
21:58:00	7.91528	12859.1
22:08:00	7.92222	13030.6
22:18:00	7.92917	13099.3
22:28:00	7.93611	13281
22:38:00	7.94306	13315
22:48:00	7.95	13472.8
22:58:00	7.95694	13642.2
23:08:00	7.96389	13799.7
23:18:00	7.97083	13940.9
23:28:00	7.97778	13958.7
23:38:00	7.98472	14095
23:48:00	7.99167	14335.7
23:58:00	7.99861	14373.5
00:08:00	8.00556	14433.7
00:18:00	8.0125	14707.2
00:28:00	8.01944	14739.6
00:38:00	8.02639	14697.6
00:48:00	8.03333	14855.8
00:58:00	8.04028	14940.1
01:08:00	8.04722	15030.1
01:18:00	8.05417	15074.5
01:28:00	8.06111	15157.7
01:38:00	8.06806	15200
01:48:00	8.075	15157
01:58:00	8.08194	15250.1
02:08:00	8.08889	15317.5
02:18:00	8.09583	15305.7
02:28:00	8.10278	15275.3
02:38:00	8.10972	15303.4
02:48:00	8.11667	15386
02:58:00	8.12361	15400.1
03:08:00	8.13056	15356.7
03:18:00	8.1375	15359.8
03:28:00	8.14444	15263.9
03:38:00	8.15139	15135.6
03:48:00	8.15833	15187.9
03:58:00	8.16528	15171.7
04:08:00	8.17222	15101.9
04:18:00	8.17917	14991.8
04:28:00	8.18611	15041.4
04:38:00	8.19306	14951.2
04:48:00	8.2	14793.8
04:58:00	8.20694	14634.7
05:08:00	8.21389	14602.3
05:18:00	8.22083	14574.9
05:28:00	8.22778	14429.1
05:38:00	8.23472	14378.3
05:48:00	8.24167	14322.5
05:58:00	8.24861	14167.3
06:08:00	8.25556	13921.7
06:18:00	8.2625	13907.8
06:28:00	8.26944	13761.4
06:38:00	8.27639	13544.5
06:48:00	8.28333	13448.1
06:58:00	8.29028	13380.3
07:08:00	8.29722	13179
07:18:00	8.30417	13010.3
07:28:00	8.31111	12907.8
07:38:00	8.31806	12858.5
07:48:00	8.325	12619.2
07:58:00	8.33194	12466.4
08:08:00	8.33889	12339.4
08:18:00	8.34583	12258.2
08:28:00	8.35278	12077.7
08:38:00	8.35972	11934
08:48:00	8.36667	11810.6
08:58:00	8.37361	11764.2
09:08:00	8.38056	11537.6
09:18:00	8.3875	11393.5
09:28:00	8.39444	11189.6
09:38:00	8.40139	11080.3
09:48:00	8.40833	11031.7
09:58:00	8.41528	10818.4
10:08:00	8.42222	10704.9
10:18:00	8.42917	10609.1
10:28:00	8.43611	10451.2
10:38:00	8.44306	10356.6
10:48:00	8.45	10281.6
10:58:00	8.45694	10121.5
11:08:00	8.46389	10041.2
11:18:00	8.47083	9886.16
11:28:00	8.47778	9794.56
11:38:00	8.48472	9647.48
11:48:00	8.49167	9542.93
11:58:00	8.49861	9450.8
12:08:00	8.50556	9397.1
12:18:00	8.5125	9263.93
12:28:00	8.51944	9170.34
12:38:00	8.52639	9069.43
12:48:00	8.53333	8952.08
12:58:00	8.54028	8848.43
13:08:00	8.54722	8768.25
13:18:00	8.55417	8730.73
13:28:00	8.56111	8628.77
13:38:00	8.56806	8607.09
13:48:00	8.575	8545.4
13:58:00	8.58194	8500.43
14:08:00	8.58889	8364.3
14:18:00	8.59583	8330.99
14:28:00	8.60278	8338.51
14:38:00	8.60972	8234.46
14:48:00	8.61667	8184.83
14:58:00	8.62361	8140.42
15:08:00	8.63056	8079.39
15:18:00	8.6375	8090.48
15:28:00	8.64444	8039.68
15:38:00	8.65139	8017.9
15:48:00	8.65833	7927.63
15:58:00	8.66528	7932.38
16:08:00	8.67222	7865.9
16:18:00	8.67917	7882.4
16:28:00	8.68611	7859.97
16:38:00	8.69306	7828.16
16:48:00	8.7	7827.9
16:58:00	8.70694	7839.88
17:08:00	8.71389	7827.61
17:18:00	8.72083	7798.08
17:28:00	8.72778	7801.3
17:38:00	8.73472	7825.84
17:48:00	8.74167	7814.69
17:58:00	8.74861	7838.69
18:08:00	8.75556	7922.38
18:18:00	8.7625	7895.63
18:28:00	8.76944	7849.09
18:38:00	8.77639	7883.52
18:48:00	8.78333	7937.78
18:58:00	8.79028	7939.38
19:08:00	8.79722	7950.4
19:18:00	8.80417	7976.44
19:28:00	8.81111	8023.16
19:38:00	8.81806	8102.05
19:48:00	8.825	8115.66
19:58:00	8.83194	8113.1
20:08:00	8.83889	8149.94
20:18:00	8.84583	8196.15
20:28:00	8.85278	8252.93
20:38:00	8.85972	8306.25
20:48:00	8.86667	8323.21
20:58:00	8.87361	8348.84
21:08:00	8.88056	8404.18
21:18:00	8.8875	8397.47
21:28:00	8.89444	8446.52
21:38:00	8.90139	8500.11
21:48:00	8.90833	8507.31
21:58:00	8.91528	8529.93
22:08:00	8.92222	8599.87
22:18:00	8.92917	8712.6
22:28:00	8.93611	8684.09
22:38:00	8.94306	8686.26
22:48:00	8.95	8717.22
22:58:00	8.95694	8792.32
23:08:00	8.96389	8839.11
23:18:00	8.97083	8829.39
23:28:00	8.97778	8880.59
23:38:00	8.98472	8957.18
23:48:00	8.99167	8953.48
23:58:00	8.99861	8964.33
00:08:00	9.00556	9069.7
00:18:00	9.0125	8988.85
00:28:00	9.01944	8942.76
00:38:00	9.02639	9021.46
00:48:00	9.03333	9058.93

## Sheet: cpc-3ko-raw data
LumiCycle: cpc-3-frq-luc (Raw)
Time (hr:min)	Time (days)	counts/sec
23:52:00	0.99444	4195.49
00:02:00	1.00139	4144.1
00:12:00	1.00833	4053.46
00:22:00	1.01528	3966.44
00:32:00	1.02222	3885.34
00:42:00	1.02917	3781.95
00:52:00	1.03611	3719.58
01:02:00	1.04306	3667.4
01:12:00	1.05	3591.44
01:22:00	1.05694	3508.11
01:32:00	1.06389	3454.81
01:42:00	1.07083	3404.82
01:52:00	1.07778	3326.92
02:02:00	1.08472	3254.38
02:12:00	1.09167	3188.57
02:22:00	1.09861	3147.63
02:32:00	1.10556	3109.98
02:42:00	1.1125	3039.73
02:52:00	1.11944	2986.3
03:02:00	1.12639	2938.11
03:12:00	1.13333	2862.7
03:22:00	1.14028	2818.81
03:32:00	1.14722	2784.78
03:42:00	1.15417	2764.63
03:52:00	1.16111	2698.66
04:02:00	1.16806	2663.18
04:12:00	1.175	2635.58
04:22:00	1.18194	2582.4
04:32:00	1.18889	2543.77
04:42:00	1.19583	2520.17
04:52:00	1.20278	2488.8
05:02:00	1.20972	2438.7
05:12:00	1.21667	2404.28
05:22:00	1.22361	2380.86
05:32:00	1.23056	2367.1
05:42:00	1.2375	2327.86
05:52:00	1.24444	2289.02
06:02:00	1.25139	2275.65
06:12:00	1.25833	2228.43
06:22:00	1.26528	2248.01
06:32:00	1.27222	2192.71
06:42:00	1.27917	2179.91
06:52:00	1.28611	2184.34
07:02:00	1.29306	2146.9
07:12:00	1.3	2138.05
07:22:00	1.30694	2117.29
07:32:00	1.31389	2080.73
07:42:00	1.32083	2064.94
07:52:00	1.32778	2075.63
08:02:00	1.33472	2057.69
08:12:00	1.34167	2059.63
08:22:00	1.34861	2021.98
08:32:00	1.35556	2025.82
08:42:00	1.3625	2008.59
08:52:00	1.36944	2000.82
09:02:00	1.37639	1995.65
09:12:00	1.38333	2001.12
09:22:00	1.39028	2010.71
09:32:00	1.39722	2011.76
09:42:00	1.40417	2000.52
09:52:00	1.41111	2009.14
10:02:00	1.41806	1998.14
10:12:00	1.425	1995.88
10:22:00	1.43194	2010.06
10:32:00	1.43889	2027.24
10:42:00	1.44583	2009.05
10:52:00	1.45278	2041.06
11:02:00	1.45972	2030.33
11:12:00	1.46667	2041.26
11:22:00	1.47361	2060.32
11:32:00	1.48056	2072.67
11:42:00	1.4875	2081.09
11:52:00	1.49444	2088.95
12:02:00	1.50139	2111.66
12:12:00	1.50833	2128.66
12:22:00	1.51528	2146.14
12:32:00	1.52222	2154.24
12:42:00	1.52917	2177.24
12:52:00	1.53611	2190.97
13:02:00	1.54306	2188.24
13:12:00	1.55	2213.1
13:22:00	1.55694	2221.59
13:32:00	1.56389	2249.29
13:42:00	1.57083	2246.99
13:52:00	1.57778	2270.65
14:02:00	1.58472	2284.82
14:12:00	1.59167	2304.58
14:22:00	1.59861	2322.89
14:32:00	1.60556	2332.82
14:42:00	1.6125	2354.34
14:52:00	1.61944	2354.65
15:02:00	1.62639	2383.23
15:12:00	1.63333	2387.14
15:22:00	1.64028	2409.72
15:32:00	1.64722	2420.94
15:42:00	1.65417	2428.58
15:52:00	1.66111	2456.28
16:02:00	1.66806	2459.61
16:12:00	1.675	2487.94
16:22:00	1.68194	2481.97
16:32:00	1.68889	2482.66
16:42:00	1.69583	2502.13
16:52:00	1.70278	2497.88
17:02:00	1.70972	2498.75
17:12:00	1.71667	2502.6
17:22:00	1.72361	2517.42
17:32:00	1.73056	2513.54
17:42:00	1.7375	2525.8
17:52:00	1.74444	2515.28
18:02:00	1.75139	2514.26
18:12:00	1.75833	2529.43
18:22:00	1.76528	2525.98
18:32:00	1.77222	2532.01
18:42:00	1.77917	2535.63
18:52:00	1.78611	2535.41
19:02:00	1.79306	2528.03
19:12:00	1.8	2525.18
19:22:00	1.80694	2524.36
19:32:00	1.81389	2518.72
19:42:00	1.82083	2523.87
19:52:00	1.82778	2535.61
20:02:00	1.83472	2513.83
20:12:00	1.84167	2529.88
20:22:00	1.84861	2521.87
20:32:00	1.85556	2527.39
20:42:00	1.8625	2531.31
20:52:00	1.86944	2503.96
21:02:00	1.87639	2507.18
21:12:00	1.88333	2511.66
21:22:00	1.89028	2505.92
21:32:00	1.89722	2506.92
21:42:00	1.90417	2511.15
21:52:00	1.91111	2503.28
22:02:00	1.91806	2523.49
22:12:00	1.925	2516.57
22:22:00	1.93194	2517.16
22:32:00	1.93889	2519.81
22:42:00	1.94583	2525.19
22:52:00	1.95278	2525.01
23:02:00	1.95972	2525.98
23:12:00	1.96667	2511.58
23:22:00	1.97361	2535.85
23:32:00	1.98056	2528.76
23:42:00	1.9875	2539.76
23:52:00	1.99444	2535.48
00:02:00	2.00139	2525.1
00:12:00	2.00833	2544.95
00:22:00	2.01528	2557.17
00:32:00	2.02222	2555.59
00:42:00	2.02917	2573.69
00:52:00	2.03611	2564.69
01:02:00	2.04306	2577.09
01:12:00	2.05	2572.9
01:22:00	2.05694	2573.08
01:32:00	2.06389	2582.54
01:42:00	2.07083	2591.35
01:52:00	2.07778	2593.28
02:02:00	2.08472	2604.75
02:12:00	2.09167	2615.65
02:22:00	2.09861	2612.81
02:32:00	2.10556	2615.11
02:42:00	2.1125	2633.29
02:52:00	2.11944	2630.98
03:02:00	2.12639	2641.62
03:12:00	2.13333	2655.6
03:22:00	2.14028	2660.15
03:32:00	2.14722	2669.99
03:42:00	2.15417	2685.13
03:52:00	2.16111	2689.68
04:02:00	2.16806	2711.54
04:12:00	2.175	2713.95
04:22:00	2.18194	2721.26
04:32:00	2.18889	2736.38
04:42:00	2.19583	2748.38
04:52:00	2.20278	2761.69
05:02:00	2.20972	2790.54
05:12:00	2.21667	2805.48
05:22:00	2.22361	2801.42
05:32:00	2.23056	2823.54
05:42:00	2.2375	2827.64
05:52:00	2.24444	2868.16
06:02:00	2.25139	2887.08
06:12:00	2.25833	2905.56
06:22:00	2.26528	2905.76
06:32:00	2.27222	2938.1
06:42:00	2.27917	2956.16
06:52:00	2.28611	2990.01
07:02:00	2.29306	2975.05
07:12:00	2.3	3006.52
07:22:00	2.30694	3046.49
07:32:00	2.31389	3067.24
07:42:00	2.32083	3096
07:52:00	2.32778	3115.39
08:02:00	2.33472	3157.47
08:12:00	2.34167	3167.31
08:22:00	2.34861	3211.95
08:32:00	2.35556	3207.98
08:42:00	2.3625	3246.25
08:52:00	2.36944	3286.35
09:02:00	2.37639	3306.99
09:12:00	2.38333	3355.12
09:22:00	2.39028	3360
09:32:00	2.39722	3393.43
09:42:00	2.40417	3409.21
09:52:00	2.41111	3448.54
10:02:00	2.41806	3459.93
10:12:00	2.425	3502.46
10:22:00	2.43194	3529.85
10:32:00	2.43889	3571.98
10:42:00	2.44583	3578.31
10:52:00	2.45278	3621.17
11:02:00	2.45972	3621.93
11:12:00	2.46667	3663.29
11:22:00	2.47361	3662.16
11:32:00	2.48056	3684.74
11:42:00	2.4875	3724.12
11:52:00	2.49444	3758.39
12:02:00	2.50139	3768.67
12:12:00	2.50833	3794.95
12:22:00	2.51528	3826.06
12:32:00	2.52222	3836.09
12:42:00	2.52917	3853.1
12:52:00	2.53611	3859.13
13:02:00	2.54306	3886.91
13:12:00	2.55	3892.01
13:22:00	2.55694	3890.27
13:32:00	2.56389	3907.22
13:42:00	2.57083	3928.91
13:52:00	2.57778	3928.59
14:02:00	2.58472	3942.87
14:12:00	2.59167	3940.56
14:22:00	2.59861	3967.7
14:32:00	2.60556	3954.18
14:42:00	2.6125	3953.03
14:52:00	2.61944	3955.26
15:02:00	2.62639	3956.15
15:12:00	2.63333	3957.77
15:22:00	2.64028	3940.42
15:32:00	2.64722	3931.7
15:42:00	2.65417	3938.8
15:52:00	2.66111	3934.02
16:02:00	2.66806	3919.02
16:12:00	2.675	3910.69
16:22:00	2.68194	3928.13
16:32:00	2.68889	3905.05
16:42:00	2.69583	3872.53
16:52:00	2.70278	3889.29
17:02:00	2.70972	3855.04
17:12:00	2.71667	3861.75
17:22:00	2.72361	3856.26
17:32:00	2.73056	3818.49
17:42:00	2.7375	3824.84
17:52:00	2.74444	3800.09
18:02:00	2.75139	3778.31
18:12:00	2.75833	3801.44
18:22:00	2.76528	3768.4
18:32:00	2.77222	3754.81
18:42:00	2.77917	3732.25
18:52:00	2.78611	3716.3
19:02:00	2.79306	3714.82
19:12:00	2.8	3705.73
19:22:00	2.80694	3682.2
19:32:00	2.81389	3671.78
19:42:00	2.82083	3679.36
19:52:00	2.82778	3648.13
20:02:00	2.83472	3623.45
20:12:00	2.84167	3616.21
20:22:00	2.84861	3599
20:32:00	2.85556	3618.32
20:42:00	2.8625	3587.88
20:52:00	2.86944	3596.55
21:02:00	2.87639	3580.72
21:12:00	2.88333	3568.89
21:22:00	2.89028	3550.75
21:32:00	2.89722	3546.66
21:42:00	2.90417	3535.62
21:52:00	2.91111	3518.97
22:02:00	2.91806	3523.35
22:12:00	2.925	3539.95
22:22:00	2.93194	3532.92
22:32:00	2.93889	3503.62
22:42:00	2.94583	3506.78
22:52:00	2.95278	3505.66
23:02:00	2.95972	3497.27
23:12:00	2.96667	3499.37
23:22:00	2.97361	3499.19
23:32:00	2.98056	3518.85
23:42:00	2.9875	3511.74
23:52:00	2.99444	3520.83
00:02:00	3.00139	3511.32
00:12:00	3.00833	3525.71
00:22:00	3.01528	3541.05
00:32:00	3.02222	3534.02
00:42:00	3.02917	3543.73
00:52:00	3.03611	3558.98
01:02:00	3.04306	3584.11
01:12:00	3.05	3577.24
01:22:00	3.05694	3598.71
01:32:00	3.06389	3616.62
01:42:00	3.07083	3627.74
01:52:00	3.07778	3647.74
02:02:00	3.08472	3627.38
02:12:00	3.09167	3680.49
02:22:00	3.09861	3687.8
02:32:00	3.10556	3725.53
02:42:00	3.1125	3773.15
02:52:00	3.11944	3760.1
03:02:00	3.12639	3800.68
03:12:00	3.13333	3833.49
03:22:00	3.14028	3845.16
03:32:00	3.14722	3898.02
03:42:00	3.15417	3943.43
03:52:00	3.16111	3943.73
04:02:00	3.16806	4000.86
04:12:00	3.175	4041.53
04:22:00	3.18194	4070.65
04:32:00	3.18889	4117.6
04:42:00	3.19583	4154.1
04:52:00	3.20278	4211.44
05:02:00	3.20972	4253.44
05:12:00	3.21667	4298.29
05:22:00	3.22361	4353.51
05:32:00	3.23056	4378.42
05:42:00	3.2375	4433.23
05:52:00	3.24444	4497.31
06:02:00	3.25139	4515.53
06:12:00	3.25833	4572.38
06:22:00	3.26528	4653.1
06:32:00	3.27222	4732.84
06:42:00	3.27917	4767.58
06:52:00	3.28611	4849.34
07:02:00	3.29306	4909.75
07:12:00	3.3	4963.55
07:22:00	3.30694	5021.43
07:32:00	3.31389	5064.26
07:42:00	3.32083	5124.75
07:52:00	3.32778	5173.43
08:02:00	3.33472	5234.39
08:12:00	3.34167	5295.19
08:22:00	3.34861	5362.66
08:32:00	3.35556	5447.39
08:42:00	3.3625	5459.37
08:52:00	3.36944	5491.75
09:02:00	3.37639	5523.26
09:12:00	3.38333	5530.51
09:22:00	3.39028	5612.27
09:32:00	3.39722	5704.48
09:42:00	3.40417	5747.9
09:52:00	3.41111	5797.34
10:02:00	3.41806	5830.86
10:12:00	3.425	5901.37
10:22:00	3.43194	5904.36
10:32:00	3.43889	5950.65
10:42:00	3.44583	5982.89
10:52:00	3.45278	6018.27
11:02:00	3.45972	6042.13
11:12:00	3.46667	6100.72
11:22:00	3.47361	6085.95
11:32:00	3.48056	6109.5
11:42:00	3.4875	6145.78
11:52:00	3.49444	6137.98
12:02:00	3.50139	6100.02
12:12:00	3.50833	6197.4
12:22:00	3.51528	6157.14
12:32:00	3.52222	6155.99
12:42:00	3.52917	6116.22
12:52:00	3.53611	6138.07
13:02:00	3.54306	6162.64
13:12:00	3.55	6125.55
13:22:00	3.55694	6100.34
13:32:00	3.56389	6154.93
13:42:00	3.57083	6146.6
13:52:00	3.57778	6083.29
14:02:00	3.58472	6075.47
14:12:00	3.59167	6068.53
14:22:00	3.59861	6050.68
14:32:00	3.60556	6032.41
14:42:00	3.6125	5986.62
14:52:00	3.61944	6017.4
15:02:00	3.62639	6023.16
15:12:00	3.63333	6012.96
15:22:00	3.64028	6022.36
15:32:00	3.64722	5947.24
15:42:00	3.65417	5930.52
15:52:00	3.66111	5933.08
16:02:00	3.66806	5909.08
16:12:00	3.675	5866.73
16:22:00	3.68194	5780.49
16:32:00	3.68889	5800.7
16:42:00	3.69583	5753.86
16:52:00	3.70278	5757.15
17:02:00	3.70972	5778.07
17:12:00	3.71667	5748.19
17:22:00	3.72361	5722.23
17:32:00	3.73056	5671.45
17:42:00	3.7375	5662.01
17:52:00	3.74444	5627.38
18:02:00	3.75139	5586.86
18:12:00	3.75833	5571.22
18:22:00	3.76528	5586.38
18:32:00	3.77222	5536.17
18:42:00	3.77917	5577.58
18:52:00	3.78611	5546.41
19:02:00	3.79306	5530.75
19:12:00	3.8	5518.12
19:22:00	3.80694	5510.26
19:32:00	3.81389	5485.73
19:42:00	3.82083	5495.56
19:52:00	3.82778	5461.22
20:02:00	3.83472	5498.25
20:12:00	3.84167	5506.79
20:22:00	3.84861	5473.66
20:32:00	3.85556	5510.98
20:42:00	3.8625	5520.7
20:52:00	3.86944	5528.37
21:02:00	3.87639	5527.09
21:12:00	3.88333	5546.29
21:22:00	3.89028	5541.08
21:32:00	3.89722	5534.62
21:42:00	3.90417	5632.22
21:52:00	3.91111	5630.81
22:02:00	3.91806	5621.57
22:12:00	3.925	5624.86
22:22:00	3.93194	5678.19
22:32:00	3.93889	5705.42
22:42:00	3.94583	5763.02
22:52:00	3.95278	5768.13
23:02:00	3.95972	5795.47
23:12:00	3.96667	5829.94
23:22:00	3.97361	5848.75
23:32:00	3.98056	5889.02
23:42:00	3.9875	5911.18
23:52:00	3.99444	5927.52
00:02:00	4.00139	5963.75
00:12:00	4.00833	6075.27
00:22:00	4.01528	6099.4
00:32:00	4.02222	6162.6
00:42:00	4.02917	6248.52
00:52:00	4.03611	6279.05
01:02:00	4.04306	6381.52
01:12:00	4.05	6535.28
01:22:00	4.05694	6542.33
01:32:00	4.06389	6591.77
01:42:00	4.07083	6692.8
01:52:00	4.07778	6797.56
02:02:00	4.08472	6810.28
02:12:00	4.09167	6887.24
02:22:00	4.09861	6991.4
02:32:00	4.10556	7041.87
02:42:00	4.1125	7179.83
02:52:00	4.11944	7181.2
03:02:00	4.12639	7296.78
03:12:00	4.13333	7371.51
03:22:00	4.14028	7463.24
03:32:00	4.14722	7537.55
03:42:00	4.15417	7616.38
03:52:00	4.16111	7662.26
04:02:00	4.16806	7873.41
04:12:00	4.175	7929.81
04:22:00	4.18194	7988.3
04:32:00	4.18889	8139.35
04:42:00	4.19583	8248.54
04:52:00	4.20278	8262.55
05:02:00	4.20972	8377.36
05:12:00	4.21667	8459.69
05:22:00	4.22361	8568.4
05:32:00	4.23056	8510.59
05:42:00	4.2375	8635.35
05:52:00	4.24444	8753.8
06:02:00	4.25139	8767.83
06:12:00	4.25833	8801.77
06:22:00	4.26528	8981.02
06:32:00	4.27222	9027.23
06:42:00	4.27917	9084.04
06:52:00	4.28611	9070.99
07:02:00	4.29306	9120.97
07:12:00	4.3	9235.56
07:22:00	4.30694	9217.15
07:32:00	4.31389	9169.76
07:42:00	4.32083	9193.36
07:52:00	4.32778	9210.87
08:02:00	4.33472	9199.76
08:12:00	4.34167	9136.86
08:22:00	4.34861	9220.13
08:32:00	4.35556	9146.41
08:42:00	4.3625	9188.27
08:52:00	4.36944	9193.05
09:02:00	4.37639	9139.4
09:12:00	4.38333	9219.17
09:22:00	4.39028	9162.96
09:32:00	4.39722	9115.98
09:42:00	4.40417	9036.67
09:52:00	4.41111	9009.06
10:02:00	4.41806	8999.11
10:12:00	4.425	8915.06
10:22:00	4.43194	8869.66
10:32:00	4.43889	8824.84
10:42:00	4.44583	8746.92
10:52:00	4.45278	8701.71
11:02:00	4.45972	8655.82
11:12:00	4.46667	8596.78
11:22:00	4.47361	8577.45
11:32:00	4.48056	8559.98
11:42:00	4.4875	8501.48
11:52:00	4.49444	8431
12:02:00	4.50139	8367.1
12:12:00	4.50833	8283.69
12:22:00	4.51528	8210.22
12:32:00	4.52222	8074.24
12:42:00	4.52917	8061.12
12:52:00	4.53611	8001.15
13:02:00	4.54306	7930.08
13:12:00	4.55	7840.48
13:22:00	4.55694	7834.74
13:32:00	4.56389	7761.4
13:42:00	4.57083	7725.48
13:52:00	4.57778	7737.44
14:02:00	4.58472	7629.01
14:12:00	4.59167	7567.45
14:22:00	4.59861	7562.58
14:32:00	4.60556	7563.17
14:42:00	4.6125	7476.2
14:52:00	4.61944	7427.78
15:02:00	4.62639	7351.88
15:12:00	4.63333	7318.73
15:22:00	4.64028	7249.05
15:32:00	4.64722	7204.25
15:42:00	4.65417	7216.46
15:52:00	4.66111	7146.07
16:02:00	4.66806	7185.23
16:12:00	4.675	7143.51
16:22:00	4.68194	7103.1
16:32:00	4.68889	7052.57
16:42:00	4.69583	7067.7
16:52:00	4.70278	7056.42
17:02:00	4.70972	6976.91
17:12:00	4.71667	7016.92
17:22:00	4.72361	6940.87
17:32:00	4.73056	6935.44
17:42:00	4.7375	6897.45
17:52:00	4.74444	6865.83
18:02:00	4.75139	6893.74
18:12:00	4.75833	6894.87
18:22:00	4.76528	6934.77
18:32:00	4.77222	6891.18
18:42:00	4.77917	6909.81
18:52:00	4.78611	6945.08
19:02:00	4.79306	6927.85
19:12:00	4.8	6992.48
19:22:00	4.80694	7000.56
19:32:00	4.81389	6993.69
19:42:00	4.82083	6995.24
19:52:00	4.82778	6984.85
20:02:00	4.83472	7041.22
20:12:00	4.84167	7072.01
20:22:00	4.84861	7119.89
20:32:00	4.85556	7094.91
20:42:00	4.8625	7190.08
20:52:00	4.86944	7203.18
21:02:00	4.87639	7267.48
21:12:00	4.88333	7288.34
21:22:00	4.89028	7329.68
21:32:00	4.89722	7413.03
21:42:00	4.90417	7440.55
21:52:00	4.91111	7478.32
22:02:00	4.91806	7575.45
22:12:00	4.925	7595.72
22:22:00	4.93194	7617.64
22:32:00	4.93889	7742.22
22:42:00	4.94583	7787.37
22:52:00	4.95278	7841.98
23:02:00	4.95972	7913.44
23:12:00	4.96667	7943.48
23:22:00	4.97361	7965.54
23:32:00	4.98056	8136.19
23:42:00	4.9875	8162.45
23:52:00	4.99444	8210.67
00:02:00	5.00139	8306.47
00:12:00	5.00833	8395.53
00:22:00	5.01528	8542.36
00:32:00	5.02222	8579.52
00:42:00	5.02917	8666.7
00:52:00	5.03611	8765.97
01:02:00	5.04306	8779.9
01:12:00	5.05	8890.44
01:22:00	5.05694	9019.37
01:32:00	5.06389	9057.25
01:42:00	5.07083	9079.4
01:52:00	5.07778	9174.12
02:02:00	5.08472	9205.16
02:12:00	5.09167	9224.39
02:22:00	5.09861	9260.74
02:32:00	5.10556	9355.05
02:42:00	5.1125	9470.12
02:52:00	5.11944	9484.37
03:02:00	5.12639	9576.95
03:12:00	5.13333	9622.59
03:22:00	5.14028	9589.93
03:32:00	5.14722	9601.74
03:42:00	5.15417	9712.68
03:52:00	5.16111	9666.38
04:02:00	5.16806	9730.6
04:12:00	5.175	9737.96
04:22:00	5.18194	9811.98
04:32:00	5.18889	9821.15
04:42:00	5.19583	9742.24
04:52:00	5.20278	9747.71
05:02:00	5.20972	9740.29
05:12:00	5.21667	9721.1
05:22:00	5.22361	9741.76
05:32:00	5.23056	9696.94
05:42:00	5.2375	9694.31
05:52:00	5.24444	9709.99
06:02:00	5.25139	9701.43
06:12:00	5.25833	9587.5
06:22:00	5.26528	9544.17
06:32:00	5.27222	9491.57
06:42:00	5.27917	9497.69
06:52:00	5.28611	9488.7
07:02:00	5.29306	9316.24
07:12:00	5.3	9347.69
07:22:00	5.30694	9317.49
07:32:00	5.31389	9226.27
07:42:00	5.32083	9173.53
07:52:00	5.32778	9112.7
08:02:00	5.33472	9042.2
08:12:00	5.34167	8966.37
08:22:00	5.34861	8935.09
08:32:00	5.35556	8830.22
08:42:00	5.3625	8725.18
08:52:00	5.36944	8700.17
09:02:00	5.37639	8632.19
09:12:00	5.38333	8511.3
09:22:00	5.39028	8447.37
09:32:00	5.39722	8404.63
09:42:00	5.40417	8322.4
09:52:00	5.41111	8204.01
10:02:00	5.41806	8218.08
10:12:00	5.425	8141.81
10:22:00	5.43194	8050.14
10:32:00	5.43889	8109.67
10:42:00	5.44583	7949.92
10:52:00	5.45278	7920.49
11:02:00	5.45972	7826.41
11:12:00	5.46667	7758.24
11:22:00	5.47361	7626.1
11:32:00	5.48056	7562.02
11:42:00	5.4875	7548.39
11:52:00	5.49444	7518.39
12:02:00	5.50139	7464.46
12:12:00	5.50833	7382.34
12:22:00	5.51528	7407.01
12:32:00	5.52222	7339.33
12:42:00	5.52917	7303.22
12:52:00	5.53611	7251.83
13:02:00	5.54306	7203.81
13:12:00	5.55	7117.15
13:22:00	5.55694	7159.37
13:32:00	5.56389	7077.4
13:42:00	5.57083	7055.46
13:52:00	5.57778	7024.05
14:02:00	5.58472	6964.69
14:12:00	5.59167	6929.19
14:22:00	5.59861	6855.94
14:32:00	5.60556	6817.69
14:42:00	5.6125	6854.72
14:52:00	5.61944	6791.1
15:02:00	5.62639	6820.88
15:12:00	5.63333	6758.95
15:22:00	5.64028	6796.28
15:32:00	5.64722	6736.14
15:42:00	5.65417	6735.19
15:52:00	5.66111	6769.03
16:02:00	5.66806	6738.85
16:12:00	5.675	6786.07
16:22:00	5.68194	6793.76
16:32:00	5.68889	6796.49
16:42:00	5.69583	6788.21
16:52:00	5.70278	6775.48
17:02:00	5.70972	6795.67
17:12:00	5.71667	6837.6
17:22:00	5.72361	6841.7
17:32:00	5.73056	6825.12
17:42:00	5.7375	6841.47
17:52:00	5.74444	6919.02
18:02:00	5.75139	6873.34
18:12:00	5.75833	6893.44
18:22:00	5.76528	6984.35
18:32:00	5.77222	7061.12
18:42:00	5.77917	7066.12
18:52:00	5.78611	7088.42
19:02:00	5.79306	7090.52
19:12:00	5.8	7216.81
19:22:00	5.80694	7322.11
19:32:00	5.81389	7243.83
19:42:00	5.82083	7301.14
19:52:00	5.82778	7410.46
20:02:00	5.83472	7482.83
20:12:00	5.84167	7503.72
20:22:00	5.84861	7575.23
20:32:00	5.85556	7556.91
20:42:00	5.8625	7687.08
20:52:00	5.86944	7727.55
21:02:00	5.87639	7735.54
21:12:00	5.88333	7906.52
21:22:00	5.89028	7884.79
21:32:00	5.89722	7908.93
21:42:00	5.90417	7951.1
21:52:00	5.91111	8065.15
22:02:00	5.91806	8194.02
22:12:00	5.925	8251.05
22:22:00	5.93194	8261.7
22:32:00	5.93889	8322.67
22:42:00	5.94583	8458.19
22:52:00	5.95278	8474.41
23:02:00	5.95972	8487.63
23:12:00	5.96667	8606.23
23:22:00	5.97361	8715.93
23:32:00	5.98056	8756.43
23:42:00	5.9875	8823.38
23:52:00	5.99444	8871.74
00:02:00	6.00139	8931.23
00:12:00	6.00833	8980.62
00:22:00	6.01528	8952.79
00:32:00	6.02222	8967.9
00:42:00	6.02917	8967.95
00:52:00	6.03611	9046.43
01:02:00	6.04306	9035.5
01:12:00	6.05	9131.2
01:22:00	6.05694	9046.5
01:32:00	6.06389	9224.32
01:42:00	6.07083	9223.69
01:52:00	6.07778	9238.88
02:02:00	6.08472	9187.42
02:12:00	6.09167	9201.96
02:22:00	6.09861	9267.73
02:32:00	6.10556	9224.74
02:42:00	6.1125	9233.69
02:52:00	6.11944	9205.7
03:02:00	6.12639	9167.94
03:12:00	6.13333	9201.36
03:22:00	6.14028	9219.12
03:32:00	6.14722	9131.84
03:42:00	6.15417	9137.17
03:52:00	6.16111	9126.49
04:02:00	6.16806	9012.18
04:12:00	6.175	9038.18
04:22:00	6.18194	8985.27
04:32:00	6.18889	8951.27
04:42:00	6.19583	8924.9
04:52:00	6.20278	8887.14
05:02:00	6.20972	8822
05:12:00	6.21667	8774.78
05:22:00	6.22361	8753.14
05:32:00	6.23056	8671.91
05:42:00	6.2375	8565.07
05:52:00	6.24444	8582.15
06:02:00	6.25139	8529.45
06:12:00	6.25833	8472.52
06:22:00	6.26528	8366.83
06:32:00	6.27222	8338.32
06:42:00	6.27917	8228.97
06:52:00	6.28611	8197.11
07:02:00	6.29306	8130.27
07:12:00	6.3	8052.49
07:22:00	6.30694	8020.73
07:32:00	6.31389	7896.7
07:42:00	6.32083	7901.18
07:52:00	6.32778	7840.81
08:02:00	6.33472	7818.42
08:12:00	6.34167	7731.38
08:22:00	6.34861	7701.11
08:32:00	6.35556	7615.7
08:42:00	6.3625	7615.29
08:52:00	6.36944	7517.9
09:02:00	6.37639	7444.89
09:12:00	6.38333	7394.04
09:22:00	6.39028	7368.31
09:32:00	6.39722	7284.47
09:42:00	6.40417	7250.4
09:52:00	6.41111	7175.12
10:02:00	6.41806	7132.82
10:12:00	6.425	7087.5
10:22:00	6.43194	7034.85
10:32:00	6.43889	7059.59
10:42:00	6.44583	7040.36
10:52:00	6.45278	6901.23
11:02:00	6.45972	6932.65
11:12:00	6.46667	6951.22
11:22:00	6.47361	6886.35
11:32:00	6.48056	6838.45
11:42:00	6.4875	6824.22
11:52:00	6.49444	6802.52
12:02:00	6.50139	6754.52
12:12:00	6.50833	6659.43
12:22:00	6.51528	6748.42
12:32:00	6.52222	6696.5
12:42:00	6.52917	6677.06
12:52:00	6.53611	6588.72
13:02:00	6.54306	6616.96
13:12:00	6.55	6619.92
13:22:00	6.55694	6585.36
13:32:00	6.56389	6626.42
13:42:00	6.57083	6624.07
13:52:00	6.57778	6539.19
14:02:00	6.58472	6623.66
14:12:00	6.59167	6605.66
14:22:00	6.59861	6593.6
14:32:00	6.60556	6558.92
14:42:00	6.6125	6594.69
14:52:00	6.61944	6611.26
15:02:00	6.62639	6642.26
15:12:00	6.63333	6656.46
15:22:00	6.64028	6684.33
15:32:00	6.64722	6699.83
15:42:00	6.65417	6746
15:52:00	6.66111	6754.83
16:02:00	6.66806	6799.46
16:12:00	6.675	6815.38
16:22:00	6.68194	6856.6
16:32:00	6.68889	6931.77
16:42:00	6.69583	6946.83
16:52:00	6.70278	6946.04
17:02:00	6.70972	6992.94
17:12:00	6.71667	7071.83
17:22:00	6.72361	7130.57
17:32:00	6.73056	7157.7
17:42:00	6.7375	7275.73
17:52:00	6.74444	7332.95
18:02:00	6.75139	7321.09
18:12:00	6.75833	7407.67
18:22:00	6.76528	7485.9
18:32:00	6.77222	7488.68
18:42:00	6.77917	7546.41
18:52:00	6.78611	7591.68
19:02:00	6.79306	7701.62
19:12:00	6.8	7745.17
19:22:00	6.80694	7809.48
19:32:00	6.81389	7878.29
19:42:00	6.82083	7949.6
19:52:00	6.82778	7954.05
20:02:00	6.83472	8062.35
20:12:00	6.84167	8083.46
20:22:00	6.84861	8196.31
20:32:00	6.85556	8229.02
20:42:00	6.8625	8245.27
20:52:00	6.86944	8308.68
21:02:00	6.87639	8404.07
21:12:00	6.88333	8476.98
21:22:00	6.89028	8554.08
21:32:00	6.89722	8571.54
21:42:00	6.90417	8592.97
21:52:00	6.91111	8661.09
22:02:00	6.91806	8722.93
22:12:00	6.925	8670.73
22:22:00	6.93194	8742.41
22:32:00	6.93889	8726.22
22:42:00	6.94583	8877.56
22:52:00	6.95278	8873.45
23:02:00	6.95972	8914.12
23:12:00	6.96667	8886.53
23:22:00	6.97361	8927.14
23:32:00	6.98056	8912.61
23:42:00	6.9875	8925.87
23:52:00	6.99444	8961.45
00:02:00	7.00139	8958.07
00:12:00	7.00833	8930.88
00:22:00	7.01528	9007.45
00:32:00	7.02222	8980.08
00:42:00	7.02917	8933.85
00:52:00	7.03611	8914.43
01:02:00	7.04306	8906
01:12:00	7.05	8888.65
01:22:00	7.05694	8815.23
01:32:00	7.06389	8840.44
01:42:00	7.07083	8806.3
01:52:00	7.07778	8778.04
02:02:00	7.08472	8705.59
02:12:00	7.09167	8701.96
02:22:00	7.09861	8628.21
02:32:00	7.10556	8679.1
02:42:00	7.1125	8580.82
02:52:00	7.11944	8488.68
03:02:00	7.12639	8508.55
03:12:00	7.13333	8429.4
03:22:00	7.14028	8344.86
03:32:00	7.14722	8325.67
03:42:00	7.15417	8223.6
03:52:00	7.16111	8183.79
04:02:00	7.16806	8188.39
04:12:00	7.175	8072.39
04:22:00	7.18194	8027.42
04:32:00	7.18889	7965.54
04:42:00	7.19583	7951.08
04:52:00	7.20278	7878.03
05:02:00	7.20972	7785.81
05:12:00	7.21667	7747.98
05:22:00	7.22361	7722.85
05:32:00	7.23056	7623.12
05:42:00	7.2375	7573.13
05:52:00	7.24444	7503.23
06:02:00	7.25139	7462.89
06:12:00	7.25833	7378.04
06:22:00	7.26528	7385.65
06:32:00	7.27222	7330.95
06:42:00	7.27917	7246.38
06:52:00	7.28611	7224.91
07:02:00	7.29306	7151.12
07:12:00	7.3	7139.73
07:22:00	7.30694	7065.98
07:32:00	7.31389	7014.25
07:42:00	7.32083	6951.43
07:52:00	7.32778	6938.74
08:02:00	7.33472	6902.05
08:12:00	7.34167	6841.45
08:22:00	7.34861	6807.86
08:32:00	7.35556	6746.97
08:42:00	7.3625	6716.19
08:52:00	7.36944	6727.71
09:02:00	7.37639	6704.23
09:12:00	7.38333	6667.88
09:22:00	7.39028	6656.37
09:32:00	7.39722	6574.01
09:42:00	7.40417	6557.55
09:52:00	7.41111	6552.49
10:02:00	7.41806	6485.57
10:12:00	7.425	6486.72
10:22:00	7.43194	6493.23
10:32:00	7.43889	6465.78
10:42:00	7.44583	6456.37
10:52:00	7.45278	6451.99
11:02:00	7.45972	6461.14
11:12:00	7.46667	6443.86
11:22:00	7.47361	6444.17
11:32:00	7.48056	6385.2
11:42:00	7.4875	6373.91
11:52:00	7.49444	6413.89
12:02:00	7.50139	6405.24
12:12:00	7.50833	6427.64
12:22:00	7.51528	6406.56
12:32:00	7.52222	6408.11
12:42:00	7.52917	6392.3
12:52:00	7.53611	6411.36
13:02:00	7.54306	6424.2
13:12:00	7.55	6434.98
13:22:00	7.55694	6443.95
13:32:00	7.56389	6450.22
13:42:00	7.57083	6517.44
13:52:00	7.57778	6503.25
14:02:00	7.58472	6570.43
14:12:00	7.59167	6558.92
14:22:00	7.59861	6543.52
14:32:00	7.60556	6582.08
14:42:00	7.6125	6610.87
14:52:00	7.61944	6675.88
15:02:00	7.62639	6657
15:12:00	7.63333	6672.64
15:22:00	7.64028	6759
15:32:00	7.64722	6789.91
15:42:00	7.65417	6844.1
15:52:00	7.66111	6828.16
16:02:00	7.66806	6905.71
16:12:00	7.675	6910.36
16:22:00	7.68194	7023.32
16:32:00	7.68889	7061.55
16:42:00	7.69583	7067.96
16:52:00	7.70278	7118.78
17:02:00	7.70972	7148.82
17:12:00	7.71667	7246.23
17:22:00	7.72361	7248.9
17:32:00	7.73056	7280.72
17:42:00	7.7375	7338.22
17:52:00	7.74444	7360.98
18:02:00	7.75139	7414.79
18:12:00	7.75833	7456.58
18:22:00	7.76528	7509.43
18:32:00	7.77222	7531.53
18:42:00	7.77917	7607.38
18:52:00	7.78611	7593.96
19:02:00	7.79306	7601.11
19:12:00	7.8	7679.69
19:22:00	7.80694	7721.09
19:32:00	7.81389	7720.17
19:42:00	7.82083	7796.85
19:52:00	7.82778	7820.25
20:02:00	7.83472	7822.3
20:12:00	7.84167	7877.25
20:22:00	7.84861	7851.06
20:32:00	7.85556	7882.78
20:42:00	7.8625	7863.55
20:52:00	7.86944	7868.05
21:02:00	7.87639	7919.13
21:12:00	7.88333	7914.27
21:22:00	7.89028	7899.23
21:32:00	7.89722	7910.76
21:42:00	7.90417	7932.53
21:52:00	7.91111	7901.87
22:02:00	7.91806	7875.62
22:12:00	7.925	7897.03
22:22:00	7.93194	7885.41
22:32:00	7.93889	7886.03
22:42:00	7.94583	7842.13
22:52:00	7.95278	7849.94
23:02:00	7.95972	7825.03
23:12:00	7.96667	7839.41
23:22:00	7.97361	7782.02
23:32:00	7.98056	7784.67
23:42:00	7.9875	7702.3
23:52:00	7.99444	7714.38
00:02:00	8.00139	7670.38
00:12:00	8.00833	7627.83
00:22:00	8.01528	7585.61
00:32:00	8.02222	7578.86
00:42:00	8.02917	7504.75
00:52:00	8.03611	7491.04
01:02:00	8.04306	7486.77
01:12:00	8.05	7401.92
01:22:00	8.05694	7356.27
01:32:00	8.06389	7349.31
01:42:00	8.07083	7277.68
01:52:00	8.07778	7218.42
02:02:00	8.08472	7193.14
02:12:00	8.09167	7108.87
02:22:00	8.09861	7093.59
02:32:00	8.10556	7032.57
02:42:00	8.1125	6946.03
02:52:00	8.11944	6929.42
03:02:00	8.12639	6926.42
03:12:00	8.13333	6831.11
03:22:00	8.14028	6747.94
03:32:00	8.14722	6738.6
03:42:00	8.15417	6696.78
03:52:00	8.16111	6659.32
04:02:00	8.16806	6612.93
04:12:00	8.175	6523.55
04:22:00	8.18194	6518.99
04:32:00	8.18889	6435.07
04:42:00	8.19583	6386.47
04:52:00	8.20278	6331.46
05:02:00	8.20972	6248.03
05:12:00	8.21667	6225.11
05:22:00	8.22361	6172.98
05:32:00	8.23056	6149.18
05:42:00	8.2375	6106.72
05:52:00	8.24444	6084.31
06:02:00	8.25139	6018.09
06:12:00	8.25833	6035.78
06:22:00	8.26528	6015.07
06:32:00	8.27222	5963.52
06:42:00	8.27917	5891.82
06:52:00	8.28611	5893.84
07:02:00	8.29306	5908.51
07:12:00	8.3	5893.72
07:22:00	8.30694	5855.7
07:32:00	8.31389	5802.43
07:42:00	8.32083	5779.35
07:52:00	8.32778	5781.2
08:02:00	8.33472	5758.6
08:12:00	8.34167	5747.23
08:22:00	8.34861	5730.34
08:32:00	8.35556	5713.47
08:42:00	8.3625	5731.86
08:52:00	8.36944	5711.45
09:02:00	8.37639	5694.1
09:12:00	8.38333	5718.19
09:22:00	8.39028	5690.2
09:32:00	8.39722	5675.81
09:42:00	8.40417	5693.44
09:52:00	8.41111	5691.03
10:02:00	8.41806	5685.81
10:12:00	8.425	5690.94
10:22:00	8.43194	5677.89
10:32:00	8.43889	5710.92
10:42:00	8.44583	5712.97
10:52:00	8.45278	5712.28
11:02:00	8.45972	5718.45
11:12:00	8.46667	5704.95
11:22:00	8.47361	5679.73
11:32:00	8.48056	5703.99
11:42:00	8.4875	5746.85
11:52:00	8.49444	5725.1
12:02:00	8.50139	5736.21
12:12:00	8.50833	5786
12:22:00	8.51528	5794.77
12:32:00	8.52222	5804.96
12:42:00	8.52917	5783.67
12:52:00	8.53611	5824.81
13:02:00	8.54306	5884.37
13:12:00	8.55	5902.38
13:22:00	8.55694	5955.07
13:32:00	8.56389	5918.15
13:42:00	8.57083	5937.69
13:52:00	8.57778	5978.55
14:02:00	8.58472	5973.6
14:12:00	8.59167	6018.61
14:22:00	8.59861	6038.19
14:32:00	8.60556	6052.27
14:42:00	8.6125	6095.96
14:52:00	8.61944	6132.22
15:02:00	8.62639	6172.62
15:12:00	8.63333	6211.72
15:22:00	8.64028	6240.6
15:32:00	8.64722	6270.77
15:42:00	8.65417	6275.92
15:52:00	8.66111	6300.34
16:02:00	8.66806	6334.35
16:12:00	8.675	6375.52
16:22:00	8.68194	6350.62
16:32:00	8.68889	6382.76
16:42:00	8.69583	6413.55
16:52:00	8.70278	6405.83
17:02:00	8.70972	6421.82
17:12:00	8.71667	6466.64
17:22:00	8.72361	6403.84
17:32:00	8.73056	6452.99
17:42:00	8.7375	6447.15
17:52:00	8.74444	6483.74
18:02:00	8.75139	6459.36
18:12:00	8.75833	6507.29
18:22:00	8.76528	6485.6
18:32:00	8.77222	6440.26
18:42:00	8.77917	6469.19
18:52:00	8.78611	6487.87
19:02:00	8.79306	6500.72
19:12:00	8.8	6504.43
19:22:00	8.80694	6508.96
19:32:00	8.81389	6455.41
19:42:00	8.82083	6433.09
19:52:00	8.82778	6463.08
20:02:00	8.83472	6406.3
20:12:00	8.84167	6423.55
20:22:00	8.84861	6424.02
20:32:00	8.85556	6379.6
20:42:00	8.8625	6354.14
20:52:00	8.86944	6383.86
21:02:00	8.87639	6374.58
21:12:00	8.88333	6292.95
21:22:00	8.89028	6312.13
21:32:00	8.89722	6307.48
21:42:00	8.90417	6273.41
21:52:00	8.91111	6247.52
22:02:00	8.91806	6224.74
22:12:00	8.925	6172.33
22:22:00	8.93194	6150.13
22:32:00	8.93889	6142.1
22:42:00	8.94583	6113.52
22:52:00	8.95278	6100.27
23:02:00	8.95972	6064.03
23:12:00	8.96667	6035.34
23:22:00	8.97361	6027.64
23:32:00	8.98056	5952
23:42:00	8.9875	5926.1
23:52:00	8.99444	5879.47
00:02:00	9.00139	5885.32
00:12:00	9.00833	5842.61
00:22:00	9.01528	5814.91
00:32:00	9.02222	5750.34
00:42:00	9.02917	5711.11
00:52:00	9.03611	5706.85

## Sheet: cpc-1ko-raw data
LumiCycle: cpc-1-frq-luc (Raw)
Time (hr:min)	Time (days)	counts/sec
23:48:00	0.99167	6076.6
23:58:00	0.99861	5985.95
00:08:00	1.00556	5892.35
00:18:00	1.0125	5795.05
00:28:00	1.01944	5651.69
00:38:00	1.02639	5549.26
00:48:00	1.03333	5443.62
00:58:00	1.04028	5257.41
01:08:00	1.04722	5183.05
01:18:00	1.05417	5033.41
01:28:00	1.06111	4935.5
01:38:00	1.06806	4827.82
01:48:00	1.075	4750.58
01:58:00	1.08194	4634.65
02:08:00	1.08889	4542.28
02:18:00	1.09583	4441.1
02:28:00	1.10278	4398.5
02:38:00	1.10972	4332.44
02:48:00	1.11667	4243.76
02:58:00	1.12361	4196.56
03:08:00	1.13056	4117.13
03:18:00	1.1375	4059.51
03:28:00	1.14444	3999.12
03:38:00	1.15139	3956.14
03:48:00	1.15833	3900.49
03:58:00	1.16528	3865.01
04:08:00	1.17222	3820.37
04:18:00	1.17917	3786.2
04:28:00	1.18611	3765.77
04:38:00	1.19306	3690.65
04:48:00	1.2	3686.07
04:58:00	1.20694	3672.95
05:08:00	1.21389	3621.02
05:18:00	1.22083	3616.17
05:28:00	1.22778	3583.07
05:38:00	1.23472	3570.45
05:48:00	1.24167	3574.87
05:58:00	1.24861	3547.58
06:08:00	1.25556	3541.82
06:18:00	1.2625	3502.43
06:28:00	1.26944	3502.08
06:38:00	1.27639	3478.55
06:48:00	1.28333	3488.09
06:58:00	1.29028	3443.71
07:08:00	1.29722	3468.06
07:18:00	1.30417	3459.55
07:28:00	1.31111	3438.96
07:38:00	1.31806	3451.09
07:48:00	1.325	3435.37
07:58:00	1.33194	3435.73
08:08:00	1.33889	3436.91
08:18:00	1.34583	3401.47
08:28:00	1.35278	3404.01
08:38:00	1.35972	3404.24
08:48:00	1.36667	3400.38
08:58:00	1.37361	3405.26
09:08:00	1.38056	3404.78
09:18:00	1.3875	3391.56
09:28:00	1.39444	3409.28
09:38:00	1.40139	3429.57
09:48:00	1.40833	3403.25
09:58:00	1.41528	3439.83
10:08:00	1.42222	3424.28
10:18:00	1.42917	3445.26
10:28:00	1.43611	3454.87
10:38:00	1.44306	3454.12
10:48:00	1.45	3487.92
10:58:00	1.45694	3475.28
11:08:00	1.46389	3498.21
11:18:00	1.47083	3506.93
11:28:00	1.47778	3536.81
11:38:00	1.48472	3549.01
11:48:00	1.49167	3575.69
11:58:00	1.49861	3605
12:08:00	1.50556	3605.5
12:18:00	1.5125	3617.77
12:28:00	1.51944	3632.86
12:38:00	1.52639	3657.24
12:48:00	1.53333	3677.75
12:58:00	1.54028	3684.08
13:08:00	1.54722	3697.07
13:18:00	1.55417	3721.39
13:28:00	1.56111	3756.13
13:38:00	1.56806	3751.65
13:48:00	1.575	3770.01
13:58:00	1.58194	3772.13
14:08:00	1.58889	3775.86
14:18:00	1.59583	3792.48
14:28:00	1.60278	3822.08
14:38:00	1.60972	3822.88
14:48:00	1.61667	3832.35
14:58:00	1.62361	3830.11
15:08:00	1.63056	3834.51
15:18:00	1.6375	3861.66
15:28:00	1.64444	3878.93
15:38:00	1.65139	3883.22
15:48:00	1.65833	3892.05
15:58:00	1.66528	3868.49
16:08:00	1.67222	3892.05
16:18:00	1.67917	3899.29
16:28:00	1.68611	3887.98
16:38:00	1.69306	3899.72
16:48:00	1.7	3876.39
16:58:00	1.70694	3903.19
17:08:00	1.71389	3879.85
17:18:00	1.72083	3888.25
17:28:00	1.72778	3876.49
17:38:00	1.73472	3862.03
17:48:00	1.74167	3856.65
17:58:00	1.74861	3841.79
18:08:00	1.75556	3857.53
18:18:00	1.7625	3831.37
18:28:00	1.76944	3823.53
18:38:00	1.77639	3800.25
18:48:00	1.78333	3799.9
18:58:00	1.79028	3784.31
19:08:00	1.79722	3762.39
19:18:00	1.80417	3774.46
19:28:00	1.81111	3745.32
19:38:00	1.81806	3721.82
19:48:00	1.825	3703.79
19:58:00	1.83194	3682.9
20:08:00	1.83889	3683.01
20:18:00	1.84583	3664.01
20:28:00	1.85278	3637.3
20:38:00	1.85972	3622.53
20:48:00	1.86667	3609.51
20:58:00	1.87361	3580.03
21:08:00	1.88056	3556.29
21:18:00	1.8875	3532.55
21:28:00	1.89444	3526.4
21:38:00	1.90139	3502.19
21:48:00	1.90833	3479.92
21:58:00	1.91528	3465.32
22:08:00	1.92222	3441.05
22:18:00	1.92917	3420.44
22:28:00	1.93611	3402.74
22:38:00	1.94306	3381.83
22:48:00	1.95	3350.95
22:58:00	1.95694	3354.53
23:08:00	1.96389	3327.06
23:18:00	1.97083	3287.82
23:28:00	1.97778	3271.25
23:38:00	1.98472	3237.3
23:48:00	1.99167	3204.27
23:58:00	1.99861	3196.12
00:08:00	2.00556	3165.45
00:18:00	2.0125	3153.74
00:28:00	2.01944	3121.35
00:38:00	2.02639	3125.16
00:48:00	2.03333	3096.83
00:58:00	2.04028	3062.82
01:08:00	2.04722	3033.59
01:18:00	2.05417	3019.36
01:28:00	2.06111	3009.32
01:38:00	2.06806	2989.33
01:48:00	2.075	2964.33
01:58:00	2.08194	2922.03
02:08:00	2.08889	2926.38
02:18:00	2.09583	2899.32
02:28:00	2.10278	2887.6
02:38:00	2.10972	2853.77
02:48:00	2.11667	2840.75
02:58:00	2.12361	2814.56
03:08:00	2.13056	2785.55
03:18:00	2.1375	2779.56
03:28:00	2.14444	2758.2
03:38:00	2.15139	2743.89
03:48:00	2.15833	2735.85
03:58:00	2.16528	2703.45
04:08:00	2.17222	2686.7
04:18:00	2.17917	2675.29
04:28:00	2.18611	2672.1
04:38:00	2.19306	2659.66
04:48:00	2.2	2641.34
04:58:00	2.20694	2621.3
05:08:00	2.21389	2624.76
05:18:00	2.22083	2597.49
05:28:00	2.22778	2595.29
05:38:00	2.23472	2590.18
05:48:00	2.24167	2590.31
05:58:00	2.24861	2570.73
06:08:00	2.25556	2567.75
06:18:00	2.2625	2553.34
06:28:00	2.26944	2553.29
06:38:00	2.27639	2545.06
06:48:00	2.28333	2533.58
06:58:00	2.29028	2526.49
07:08:00	2.29722	2538.99
07:18:00	2.30417	2516.88
07:28:00	2.31111	2521.72
07:38:00	2.31806	2532.34
07:48:00	2.325	2518.66
07:58:00	2.33194	2518.96
08:08:00	2.33889	2528.48
08:18:00	2.34583	2509.36
08:28:00	2.35278	2520.69
08:38:00	2.35972	2504.32
08:48:00	2.36667	2508.29
08:58:00	2.37361	2522.49
09:08:00	2.38056	2521.02
09:18:00	2.3875	2510.6
09:28:00	2.39444	2520.09
09:38:00	2.40139	2513.72
09:48:00	2.40833	2545.13
09:58:00	2.41528	2556.88
10:08:00	2.42222	2539.98
10:18:00	2.42917	2540.42
10:28:00	2.43611	2559.64
10:38:00	2.44306	2545.2
10:48:00	2.45	2574.3
10:58:00	2.45694	2574.6
11:08:00	2.46389	2580.05
11:18:00	2.47083	2592.24
11:28:00	2.47778	2581.49
11:38:00	2.48472	2599.37
11:48:00	2.49167	2617.55
11:58:00	2.49861	2621.63
12:08:00	2.50556	2651.22
12:18:00	2.5125	2645.06
12:28:00	2.51944	2656.82
12:38:00	2.52639	2674.25
12:48:00	2.53333	2708.77
12:58:00	2.54028	2681.53
13:08:00	2.54722	2710.59
13:18:00	2.55417	2714.89
13:28:00	2.56111	2721.63
13:38:00	2.56806	2735.89
13:48:00	2.575	2742.44
13:58:00	2.58194	2758.69
14:08:00	2.58889	2759.32
14:18:00	2.59583	2760.75
14:28:00	2.60278	2792.97
14:38:00	2.60972	2798.85
14:48:00	2.61667	2789.39
14:58:00	2.62361	2824.35
15:08:00	2.63056	2823.92
15:18:00	2.6375	2833.79
15:28:00	2.64444	2840.53
15:38:00	2.65139	2853.06
15:48:00	2.65833	2850.4
15:58:00	2.66528	2860.94
16:08:00	2.67222	2873.34
16:18:00	2.67917	2878.57
16:28:00	2.68611	2875.26
16:38:00	2.69306	2899.94
16:48:00	2.7	2883.83
16:58:00	2.70694	2883.22
17:08:00	2.71389	2885.05
17:18:00	2.72083	2899.02
17:28:00	2.72778	2907.61
17:38:00	2.73472	2904.86
17:48:00	2.74167	2923.38
17:58:00	2.74861	2928.63
18:08:00	2.75556	2933.99
18:18:00	2.7625	2925.8
18:28:00	2.76944	2931.97
18:38:00	2.77639	2933.41
18:48:00	2.78333	2945.43
18:58:00	2.79028	2949.5
19:08:00	2.79722	2937.92
19:18:00	2.80417	2946.75
19:28:00	2.81111	2941.62
19:38:00	2.81806	2944.9
19:48:00	2.825	2952.21
19:58:00	2.83194	2959.78
20:08:00	2.83889	2957.58
20:18:00	2.84583	2947.84
20:28:00	2.85278	2944.2
20:38:00	2.85972	2960.47
20:48:00	2.86667	2947.83
20:58:00	2.87361	2962.73
21:08:00	2.88056	2940.16
21:18:00	2.8875	2930.9
21:28:00	2.89444	2931.69
21:38:00	2.90139	2933.62
21:48:00	2.90833	2933.86
21:58:00	2.91528	2933.07
22:08:00	2.92222	2919.26
22:18:00	2.92917	2924
22:28:00	2.93611	2920.88
22:38:00	2.94306	2919.66
22:48:00	2.95	2923.36
22:58:00	2.95694	2932.82
23:08:00	2.96389	2912.01
23:18:00	2.97083	2903.69
23:28:00	2.97778	2898.34
23:38:00	2.98472	2909.82
23:48:00	2.99167	2914.01
23:58:00	2.99861	2898.24
00:08:00	3.00556	2896.73
00:18:00	3.0125	2908.86
00:28:00	3.01944	2886.84
00:38:00	3.02639	2896.04
00:48:00	3.03333	2888.89
00:58:00	3.04028	2888.63
01:08:00	3.04722	2894.59
01:18:00	3.05417	2900.7
01:28:00	3.06111	2894.95
01:38:00	3.06806	2900.87
01:48:00	3.075	2910.21
01:58:00	3.08194	2895.46
02:08:00	3.08889	2903.19
02:18:00	3.09583	2903.48
02:28:00	3.10278	2898.78
02:38:00	3.10972	2897.48
02:48:00	3.11667	2896.34
02:58:00	3.12361	2915.71
03:08:00	3.13056	2914.86
03:18:00	3.1375	2909.5
03:28:00	3.14444	2921.09
03:38:00	3.15139	2925.31
03:48:00	3.15833	2927.29
03:58:00	3.16528	2933.05
04:08:00	3.17222	2937.04
04:18:00	3.17917	2942.24
04:28:00	3.18611	2949.88
04:38:00	3.19306	2949.39
04:48:00	3.2	2952.61
04:58:00	3.20694	2965.8
05:08:00	3.21389	2956.46
05:18:00	3.22083	2979.19
05:28:00	3.22778	2982.46
05:38:00	3.23472	2986.53
05:48:00	3.24167	3004.16
05:58:00	3.24861	3021.87
06:08:00	3.25556	3030.58
06:18:00	3.2625	3033.53
06:28:00	3.26944	3065.01
06:38:00	3.27639	3074.51
06:48:00	3.28333	3068.9
06:58:00	3.29028	3078.78
07:08:00	3.29722	3102.61
07:18:00	3.30417	3121.41
07:28:00	3.31111	3117.09
07:38:00	3.31806	3141.45
07:48:00	3.325	3148.58
07:58:00	3.33194	3175.83
08:08:00	3.33889	3168.36
08:18:00	3.34583	3204.52
08:28:00	3.35278	3234.62
08:38:00	3.35972	3239.82
08:48:00	3.36667	3256.77
08:58:00	3.37361	3280.8
09:08:00	3.38056	3291.78
09:18:00	3.3875	3309.6
09:28:00	3.39444	3333.01
09:38:00	3.40139	3360.72
09:48:00	3.40833	3360.93
09:58:00	3.41528	3375.67
10:08:00	3.42222	3405.11
10:18:00	3.42917	3435.25
10:28:00	3.43611	3449.57
10:38:00	3.44306	3476.2
10:48:00	3.45	3505.59
10:58:00	3.45694	3532.77
11:08:00	3.46389	3544.75
11:18:00	3.47083	3560.28
11:28:00	3.47778	3590.67
11:38:00	3.48472	3634.46
11:48:00	3.49167	3613.02
11:58:00	3.49861	3639.39
12:08:00	3.50556	3664
12:18:00	3.5125	3692.56
12:28:00	3.51944	3707.76
12:38:00	3.52639	3738.41
12:48:00	3.53333	3758.69
12:58:00	3.54028	3778.54
13:08:00	3.54722	3799.32
13:18:00	3.55417	3839
13:28:00	3.56111	3862.66
13:38:00	3.56806	3872.67
13:48:00	3.575	3905.59
13:58:00	3.58194	3922.38
14:08:00	3.58889	3945.88
14:18:00	3.59583	3974.78
14:28:00	3.60278	3990.1
14:38:00	3.60972	4012.57
14:48:00	3.61667	4033.65
14:58:00	3.62361	4045.32
15:08:00	3.63056	4063.93
15:18:00	3.6375	4078
15:28:00	3.64444	4105.78
15:38:00	3.65139	4134.36
15:48:00	3.65833	4159.95
15:58:00	3.66528	4158.33
16:08:00	3.67222	4193.7
16:18:00	3.67917	4184.97
16:28:00	3.68611	4203.7
16:38:00	3.69306	4224.52
16:48:00	3.7	4227.87
16:58:00	3.70694	4236.84
17:08:00	3.71389	4253.52
17:18:00	3.72083	4278.75
17:28:00	3.72778	4307.6
17:38:00	3.73472	4312.69
17:48:00	3.74167	4310.89
17:58:00	3.74861	4344.78
18:08:00	3.75556	4368.62
18:18:00	3.7625	4380.7
18:28:00	3.76944	4379.18
18:38:00	3.77639	4413.22
18:48:00	3.78333	4409.8
18:58:00	3.79028	4403.67
19:08:00	3.79722	4437.96
19:18:00	3.80417	4428.31
19:28:00	3.81111	4442.76
19:38:00	3.81806	4481.83
19:48:00	3.825	4481.21
19:58:00	3.83194	4472.11
20:08:00	3.83889	4515.08
20:18:00	3.84583	4508.41
20:28:00	3.85278	4510.93
20:38:00	3.85972	4540.43
20:48:00	3.86667	4518.94
20:58:00	3.87361	4576.2
21:08:00	3.88056	4565.47
21:18:00	3.8875	4578.15
21:28:00	3.89444	4598.45
21:38:00	3.90139	4624.49
21:48:00	3.90833	4622.75
21:58:00	3.91528	4627.37
22:08:00	3.92222	4637.96
22:18:00	3.92917	4629.74
22:28:00	3.93611	4655.38
22:38:00	3.94306	4642.97
22:48:00	3.95	4663.85
22:58:00	3.95694	4674.32
23:08:00	3.96389	4695.52
23:18:00	3.97083	4688.89
23:28:00	3.97778	4703.14
23:38:00	3.98472	4725.73
23:48:00	3.99167	4712.24
23:58:00	3.99861	4709.15
00:08:00	4.00556	4726.26
00:18:00	4.0125	4765.69
00:28:00	4.01944	4783.91
00:38:00	4.02639	4758.36
00:48:00	4.03333	4785.85
00:58:00	4.04028	4790.8
01:08:00	4.04722	4813.01
01:18:00	4.05417	4804.87
01:28:00	4.06111	4837.47
01:38:00	4.06806	4846.99
01:48:00	4.075	4852.63
01:58:00	4.08194	4885.06
02:08:00	4.08889	4915.81
02:18:00	4.09583	4902.36
02:28:00	4.10278	4930.85
02:38:00	4.10972	4928.15
02:48:00	4.11667	4941.48
02:58:00	4.12361	4965.85
03:08:00	4.13056	4979.89
03:18:00	4.1375	5006.34
03:28:00	4.14444	5025.13
03:38:00	4.15139	5035.4
03:48:00	4.15833	5058.45
03:58:00	4.16528	5089.91
04:08:00	4.17222	5124.09
04:18:00	4.17917	5113.37
04:28:00	4.18611	5137.82
04:38:00	4.19306	5144.93
04:48:00	4.2	5182.28
04:58:00	4.20694	5215.71
05:08:00	4.21389	5225.16
05:18:00	4.22083	5269.31
05:28:00	4.22778	5298.62
05:38:00	4.23472	5321.61
05:48:00	4.24167	5359.66
05:58:00	4.24861	5379.93
06:08:00	4.25556	5407.5
06:18:00	4.2625	5436.8
06:28:00	4.26944	5465.57
06:38:00	4.27639	5499.33
06:48:00	4.28333	5537.34
06:58:00	4.29028	5560.61
07:08:00	4.29722	5614.71
07:18:00	4.30417	5620.19
07:28:00	4.31111	5647.98
07:38:00	4.31806	5711.84
07:48:00	4.325	5743.25
07:58:00	4.33194	5773.68
08:08:00	4.33889	5803.96
08:18:00	4.34583	5859.05
08:28:00	4.35278	5923.91
08:38:00	4.35972	5958.72
08:48:00	4.36667	5978.69
08:58:00	4.37361	6038.46
09:08:00	4.38056	6061.52
09:18:00	4.3875	6119.25
09:28:00	4.39444	6171.84
09:38:00	4.40139	6180.34
09:48:00	4.40833	6241.33
09:58:00	4.41528	6282.01
10:08:00	4.42222	6330.82
10:18:00	4.42917	6359.23
10:28:00	4.43611	6395.09
10:38:00	4.44306	6406.89
10:48:00	4.45	6492.41
10:58:00	4.45694	6535.71
11:08:00	4.46389	6593.04
11:18:00	4.47083	6628.72
11:28:00	4.47778	6658.13
11:38:00	4.48472	6691.78
11:48:00	4.49167	6737.77
11:58:00	4.49861	6791.08
12:08:00	4.50556	6859.27
12:18:00	4.5125	6897.52
12:28:00	4.51944	6964.63
12:38:00	4.52639	6990.09
12:48:00	4.53333	7032.03
12:58:00	4.54028	7045.02
13:08:00	4.54722	7117.96
13:18:00	4.55417	7147.99
13:28:00	4.56111	7192.12
13:38:00	4.56806	7249.22
13:48:00	4.575	7315.04
13:58:00	4.58194	7309.44
14:08:00	4.58889	7377.29
14:18:00	4.59583	7393.01
14:28:00	4.60278	7422.05
14:38:00	4.60972	7508.9
14:48:00	4.61667	7499.13
14:58:00	4.62361	7560.32
15:08:00	4.63056	7573.24
15:18:00	4.6375	7637.91
15:28:00	4.64444	7648.74
15:38:00	4.65139	7696.38
15:48:00	4.65833	7744.54
15:58:00	4.66528	7762.48
16:08:00	4.67222	7784.39
16:18:00	4.67917	7862.13
16:28:00	4.68611	7870.17
16:38:00	4.69306	7909.42
16:48:00	4.7	7947.97
16:58:00	4.70694	7984.48
17:08:00	4.71389	8046.19
17:18:00	4.72083	8063.5
17:28:00	4.72778	8079.29
17:38:00	4.73472	8090.49
17:48:00	4.74167	8094.41
17:58:00	4.74861	8142.41
18:08:00	4.75556	8126.02
18:18:00	4.7625	8173.9
18:28:00	4.76944	8200.31
18:38:00	4.77639	8211.25
18:48:00	4.78333	8208.34
18:58:00	4.79028	8201.91
19:08:00	4.79722	8284.63
19:18:00	4.80417	8290.99
19:28:00	4.81111	8349.45
19:38:00	4.81806	8382.69
19:48:00	4.825	8324.75
19:58:00	4.83194	8427.31
20:08:00	4.83889	8461.86
20:18:00	4.84583	8461.95
20:28:00	4.85278	8422.93
20:38:00	4.85972	8497.7
20:48:00	4.86667	8518.01
20:58:00	4.87361	8508.91
21:08:00	4.88056	8523.93
21:18:00	4.8875	8517.71
21:28:00	4.89444	8532.07
21:38:00	4.90139	8576.59
21:48:00	4.90833	8580.35
21:58:00	4.91528	8617.34
22:08:00	4.92222	8640.42
22:18:00	4.92917	8630.9
22:28:00	4.93611	8656.76
22:38:00	4.94306	8686.92
22:48:00	4.95	8730.77
22:58:00	4.95694	8736.85
23:08:00	4.96389	8723.03
23:18:00	4.97083	8758.16
23:28:00	4.97778	8763.08
23:38:00	4.98472	8807.5
23:48:00	4.99167	8824.69
23:58:00	4.99861	8875.77
00:08:00	5.00556	8857.12
00:18:00	5.0125	8925.11
00:28:00	5.01944	8918.3
00:38:00	5.02639	8925.52
00:48:00	5.03333	8947.67
00:58:00	5.04028	8954.43
01:08:00	5.04722	8975.17
01:18:00	5.05417	9046.21
01:28:00	5.06111	9077.15
01:38:00	5.06806	9086.6
01:48:00	5.075	9115.06
01:58:00	5.08194	9163.88
02:08:00	5.08889	9139.05
02:18:00	5.09583	9193.41
02:28:00	5.10278	9230.21
02:38:00	5.10972	9269.1
02:48:00	5.11667	9304.15
02:58:00	5.12361	9390.72
03:08:00	5.13056	9414.53
03:18:00	5.1375	9481.32
03:28:00	5.14444	9459.03
03:38:00	5.15139	9491.01
03:48:00	5.15833	9525.26
03:58:00	5.16528	9550.89
04:08:00	5.17222	9585.24
04:18:00	5.17917	9692.71
04:28:00	5.18611	9715.69
04:38:00	5.19306	9724.04
04:48:00	5.2	9766.05
04:58:00	5.20694	9854.18
05:08:00	5.21389	9922
05:18:00	5.22083	9978.67
05:28:00	5.22778	10030.1
05:38:00	5.23472	10112.3
05:48:00	5.24167	10119.1
05:58:00	5.24861	10198.7
06:08:00	5.25556	10233.1
06:18:00	5.2625	10273.8
06:28:00	5.26944	10326.3
06:38:00	5.27639	10412.7
06:48:00	5.28333	10418.4
06:58:00	5.29028	10526.1
07:08:00	5.29722	10575.9
07:18:00	5.30417	10595.4
07:28:00	5.31111	10713.6
07:38:00	5.31806	10763.3
07:48:00	5.325	10833.6
07:58:00	5.33194	10882.7
08:08:00	5.33889	10942.8
08:18:00	5.34583	10970.5
08:28:00	5.35278	11078.8
08:38:00	5.35972	11200.9
08:48:00	5.36667	11199.1
08:58:00	5.37361	11283.1
09:08:00	5.38056	11351.7
09:18:00	5.3875	11459.1
09:28:00	5.39444	11482.8
09:38:00	5.40139	11479.6
09:48:00	5.40833	11651.6
09:58:00	5.41528	11694.8
10:08:00	5.42222	11777.8
10:18:00	5.42917	11779.5
10:28:00	5.43611	11902.1
10:38:00	5.44306	11997.5
10:48:00	5.45	12033.4
10:58:00	5.45694	12139.3
11:08:00	5.46389	12190.6
11:18:00	5.47083	12243.1
11:28:00	5.47778	12300.8
11:38:00	5.48472	12358.3
11:48:00	5.49167	12423.2
11:58:00	5.49861	12447.5
12:08:00	5.50556	12535.5
12:18:00	5.5125	12637.1
12:28:00	5.51944	12676.2
12:38:00	5.52639	12640.2
12:48:00	5.53333	12725.7
12:58:00	5.54028	12769.8
13:08:00	5.54722	12868.9
13:18:00	5.55417	12942.5
13:28:00	5.56111	12969.8
13:38:00	5.56806	13054.7
13:48:00	5.575	13130.6
13:58:00	5.58194	13122.5
14:08:00	5.58889	13105.4
14:18:00	5.59583	13141.4
14:28:00	5.60278	13203.2
14:38:00	5.60972	13199.2
14:48:00	5.61667	13236.6
14:58:00	5.62361	13318.4
15:08:00	5.63056	13356.9
15:18:00	5.6375	13344.1
15:28:00	5.64444	13371.9
15:38:00	5.65139	13418.3
15:48:00	5.65833	13471.2
15:58:00	5.66528	13511.4
16:08:00	5.67222	13495.2
16:18:00	5.67917	13524.2
16:28:00	5.68611	13551.4
16:38:00	5.69306	13546
16:48:00	5.7	13564.2
16:58:00	5.70694	13660
17:08:00	5.71389	13620.1
17:18:00	5.72083	13636.9
17:28:00	5.72778	13799.8
17:38:00	5.73472	13784.1
17:48:00	5.74167	13792.3
17:58:00	5.74861	13740.5
18:08:00	5.75556	13729.9
18:18:00	5.7625	13758.4
18:28:00	5.76944	13785.1
18:38:00	5.77639	13743.9
18:48:00	5.78333	13752.2
18:58:00	5.79028	13858.1
19:08:00	5.79722	13882.9
19:18:00	5.80417	13872.8
19:28:00	5.81111	13901.5
19:38:00	5.81806	13834.3
19:48:00	5.825	13863.3
19:58:00	5.83194	13868.6
20:08:00	5.83889	13880.8
20:18:00	5.84583	13921.6
20:28:00	5.85278	13973.5
20:38:00	5.85972	13975.5
20:48:00	5.86667	13949.8
20:58:00	5.87361	13973
21:08:00	5.88056	13942.4
21:18:00	5.8875	13913.9
21:28:00	5.89444	13897.4
21:38:00	5.90139	13927.3
21:48:00	5.90833	14029
21:58:00	5.91528	14000.4
22:08:00	5.92222	13986.7
22:18:00	5.92917	13935.8
22:28:00	5.93611	14022.7
22:38:00	5.94306	14037.7
22:48:00	5.95	13976.5
22:58:00	5.95694	14007.1
23:08:00	5.96389	14045.2
23:18:00	5.97083	14055.6
23:28:00	5.97778	14057.9
23:38:00	5.98472	14061.3
23:48:00	5.99167	14029.5
23:58:00	5.99861	14133.9
00:08:00	6.00556	14149.5
00:18:00	6.0125	14119
00:28:00	6.01944	14141.3
00:38:00	6.02639	14176.7
00:48:00	6.03333	14095.3
00:58:00	6.04028	14199.8
01:08:00	6.04722	14225.4
01:18:00	6.05417	14275.5
01:28:00	6.06111	14294.5
01:38:00	6.06806	14217.7
01:48:00	6.075	14284.7
01:58:00	6.08194	14293.5
02:08:00	6.08889	14321.9
02:18:00	6.09583	14391
02:28:00	6.10278	14366.4
02:38:00	6.10972	14405.2
02:48:00	6.11667	14493.3
02:58:00	6.12361	14499.8
03:08:00	6.13056	14456.6
03:18:00	6.1375	14478.8
03:28:00	6.14444	14574
03:38:00	6.15139	14555.1
03:48:00	6.15833	14599.1
03:58:00	6.16528	14643.7
04:08:00	6.17222	14771.4
04:18:00	6.17917	14728.2
04:28:00	6.18611	14749
04:38:00	6.19306	14852.5
04:48:00	6.2	14978.7
04:58:00	6.20694	14972
05:08:00	6.21389	14915.5
05:18:00	6.22083	14967.4
05:28:00	6.22778	15133.2
05:38:00	6.23472	15118.9
05:48:00	6.24167	15156.9
05:58:00	6.24861	15253.5
06:08:00	6.25556	15230
06:18:00	6.2625	15329.5
06:28:00	6.26944	15326.6
06:38:00	6.27639	15355.9
06:48:00	6.28333	15440.7
06:58:00	6.29028	15487.1
07:08:00	6.29722	15519.6
07:18:00	6.30417	15578.7
07:28:00	6.31111	15681.7
07:38:00	6.31806	15679.9
07:48:00	6.325	15728.7
07:58:00	6.33194	15805.8
08:08:00	6.33889	15829.9
08:18:00	6.34583	15860.6
08:28:00	6.35278	15848.1
08:38:00	6.35972	15899.2
08:48:00	6.36667	16037.7
08:58:00	6.37361	16100.2
09:08:00	6.38056	16097.8
09:18:00	6.3875	16182.4
09:28:00	6.39444	16135.9
09:38:00	6.40139	16232.5
09:48:00	6.40833	16226.9
09:58:00	6.41528	16323
10:08:00	6.42222	16394.4
10:18:00	6.42917	16342.6
10:28:00	6.43611	16432.2
10:38:00	6.44306	16414.1
10:48:00	6.45	16484.3
10:58:00	6.45694	16524.2
11:08:00	6.46389	16536.5
11:18:00	6.47083	16535.3
11:28:00	6.47778	16613.6
11:38:00	6.48472	16627.2
11:48:00	6.49167	16619.3
11:58:00	6.49861	16611.8
12:08:00	6.50556	16685
12:18:00	6.5125	16704.9
12:28:00	6.51944	16759.3
12:38:00	6.52639	16759.7
12:48:00	6.53333	16770.9
12:58:00	6.54028	16825.3
13:08:00	6.54722	16738.8
13:18:00	6.55417	16717.9
13:28:00	6.56111	16786
13:38:00	6.56806	16801.4
13:48:00	6.575	16822.3
13:58:00	6.58194	16792.8
14:08:00	6.58889	16908.8
14:18:00	6.59583	16861.3
14:28:00	6.60278	16812.7
14:38:00	6.60972	16748.5
14:48:00	6.61667	16830.3
14:58:00	6.62361	16710.5
15:08:00	6.63056	16784.1
15:18:00	6.6375	16714.2
15:28:00	6.64444	16724.7
15:38:00	6.65139	16697.7
15:48:00	6.65833	16709.7
15:58:00	6.66528	16687.4
16:08:00	6.67222	16632.6
16:18:00	6.67917	16628.6
16:28:00	6.68611	16703.7
16:38:00	6.69306	16525.1
16:48:00	6.7	16533.3
16:58:00	6.70694	16575.7
17:08:00	6.71389	16510.4
17:18:00	6.72083	16491.5
17:28:00	6.72778	16456.2
17:38:00	6.73472	16463.4
17:48:00	6.74167	16518.1
17:58:00	6.74861	16445.7
18:08:00	6.75556	16484.7
18:18:00	6.7625	16372.8
18:28:00	6.76944	16398.7
18:38:00	6.77639	16320.9
18:48:00	6.78333	16250.6
18:58:00	6.79028	16276.1
19:08:00	6.79722	16279.1
19:18:00	6.80417	16302.1
19:28:00	6.81111	16238.1
19:38:00	6.81806	16254.4
19:48:00	6.825	16240.1
19:58:00	6.83194	16145.8
20:08:00	6.83889	16168.4
20:18:00	6.84583	16106.4
20:28:00	6.85278	16136.5
20:38:00	6.85972	16126.1
20:48:00	6.86667	16101.2
20:58:00	6.87361	16056.1
21:08:00	6.88056	16083.8
21:18:00	6.8875	16111
21:28:00	6.89444	16083.8
21:38:00	6.90139	15993
21:48:00	6.90833	16011
21:58:00	6.91528	16000.2
22:08:00	6.92222	15972.1
22:18:00	6.92917	15952.6
22:28:00	6.93611	15937.6
22:38:00	6.94306	15908
22:48:00	6.95	15974.1
22:58:00	6.95694	15930.8
23:08:00	6.96389	15985.6
23:18:00	6.97083	15961.9
23:28:00	6.97778	15896.1
23:38:00	6.98472	15859.7
23:48:00	6.99167	15902.9
23:58:00	6.99861	15933.4
00:08:00	7.00556	15871
00:18:00	7.0125	15843.5
00:28:00	7.01944	15859.4
00:38:00	7.02639	15847.9
00:48:00	7.03333	15887
00:58:00	7.04028	15819.1
01:08:00	7.04722	15776.1
01:18:00	7.05417	15843.2
01:28:00	7.06111	15903.8
01:38:00	7.06806	15817.3
01:48:00	7.075	15779.9
01:58:00	7.08194	15837.1
02:08:00	7.08889	15861.3
02:18:00	7.09583	15866
02:28:00	7.10278	15836.3
02:38:00	7.10972	15825.5
02:48:00	7.11667	15864.7
02:58:00	7.12361	15814.9
03:08:00	7.13056	15817.8
03:18:00	7.1375	15818.6
03:28:00	7.14444	15820
03:38:00	7.15139	15829.7
03:48:00	7.15833	15803.4
03:58:00	7.16528	15835.2
04:08:00	7.17222	15806.2
04:18:00	7.17917	15719.4
04:28:00	7.18611	15818.5
04:38:00	7.19306	15800.1
04:48:00	7.2	15841.7
04:58:00	7.20694	15787.4
05:08:00	7.21389	15722.2
05:18:00	7.22083	15775.7
05:28:00	7.22778	15763
05:38:00	7.23472	15819.4
05:48:00	7.24167	15813.8
05:58:00	7.24861	15776.2
06:08:00	7.25556	15799.3
06:18:00	7.2625	15735
06:28:00	7.26944	15698.4
06:38:00	7.27639	15757.8
06:48:00	7.28333	15745.8
06:58:00	7.29028	15756.2
07:08:00	7.29722	15688.1
07:18:00	7.30417	15642.8
07:28:00	7.31111	15641.8
07:38:00	7.31806	15622.4
07:48:00	7.325	15609.8
07:58:00	7.33194	15565.8
08:08:00	7.33889	15511.6
08:18:00	7.34583	15472.8
08:28:00	7.35278	15559.5
08:38:00	7.35972	15486.6
08:48:00	7.36667	15461.4
08:58:00	7.37361	15464.3
09:08:00	7.38056	15425.8
09:18:00	7.3875	15355.1
09:28:00	7.39444	15320.1
09:38:00	7.40139	15199.4
09:48:00	7.40833	15228.8
09:58:00	7.41528	15189.7
10:08:00	7.42222	15136.5
10:18:00	7.42917	15065.9
10:28:00	7.43611	15051.9
10:38:00	7.44306	15022.3
10:48:00	7.45	14956.1
10:58:00	7.45694	14887.5
11:08:00	7.46389	14832.9
11:18:00	7.47083	14825.7
11:28:00	7.47778	14812.1
11:38:00	7.48472	14799.4
11:48:00	7.49167	14783.4
11:58:00	7.49861	14686.4
12:08:00	7.50556	14701.5
12:18:00	7.5125	14657.3
12:28:00	7.51944	14625.1
12:38:00	7.52639	14599.5
12:48:00	7.53333	14528.3
12:58:00	7.54028	14517.5
13:08:00	7.54722	14465
13:18:00	7.55417	14448.3
13:28:00	7.56111	14473
13:38:00	7.56806	14406
13:48:00	7.575	14371.4
13:58:00	7.58194	14348.8
14:08:00	7.58889	14323.3
14:18:00	7.59583	14268.5
14:28:00	7.60278	14264.3
14:38:00	7.60972	14253.9
14:48:00	7.61667	14192
14:58:00	7.62361	14164.6
15:08:00	7.63056	14188.4
15:18:00	7.6375	14167
15:28:00	7.64444	14177.1
15:38:00	7.65139	14176.3
15:48:00	7.65833	14140.8
15:58:00	7.66528	14167.5
16:08:00	7.67222	14136.2
16:18:00	7.67917	14113.6
16:28:00	7.68611	14124.4
16:38:00	7.69306	14095.7
16:48:00	7.7	14131.8
16:58:00	7.70694	14092.9
17:08:00	7.71389	14117
17:18:00	7.72083	14136.5
17:28:00	7.72778	14169.9
17:38:00	7.73472	14137.9
17:48:00	7.74167	14163
17:58:00	7.74861	14175.8
18:08:00	7.75556	14199.3
18:18:00	7.7625	14177.1
18:28:00	7.76944	14213.2
18:38:00	7.77639	14198.3
18:48:00	7.78333	14173.7
18:58:00	7.79028	14204.9
19:08:00	7.79722	14209.2
19:18:00	7.80417	14234.6
19:28:00	7.81111	14239.2
19:38:00	7.81806	14264.5
19:48:00	7.825	14278.1
19:58:00	7.83194	14268.1
20:08:00	7.83889	14268
20:18:00	7.84583	14300
20:28:00	7.85278	14286.8
20:38:00	7.85972	14273.9
20:48:00	7.86667	14277.1
20:58:00	7.87361	14288.6
21:08:00	7.88056	14319
21:18:00	7.8875	14308.6
21:28:00	7.89444	14323.6
21:38:00	7.90139	14319.4
21:48:00	7.90833	14329.9
21:58:00	7.91528	14325.3
22:08:00	7.92222	14300.4
22:18:00	7.92917	14285.1
22:28:00	7.93611	14288.6
22:38:00	7.94306	14286.6
22:48:00	7.95	14284.3
22:58:00	7.95694	14251.5
23:08:00	7.96389	14202.8
23:18:00	7.97083	14205
23:28:00	7.97778	14192.9
23:38:00	7.98472	14149.7
23:48:00	7.99167	14095.8
23:58:00	7.99861	14061.4
00:08:00	8.00556	13977.8
00:18:00	8.0125	13939.5
00:28:00	8.01944	13890
00:38:00	8.02639	13806.6
00:48:00	8.03333	13744.9
00:58:00	8.04028	13699.5
01:08:00	8.04722	13612.6
01:18:00	8.05417	13545.4
01:28:00	8.06111	13498.4
01:38:00	8.06806	13453.9
01:48:00	8.075	13352
01:58:00	8.08194	13291.1
02:08:00	8.08889	13222.7
02:18:00	8.09583	13144.9
02:28:00	8.10278	13045.4
02:38:00	8.10972	12990.2
02:48:00	8.11667	12927.7
02:58:00	8.12361	12836
03:08:00	8.13056	12740.1
03:18:00	8.1375	12651.6
03:28:00	8.14444	12587.1
03:38:00	8.15139	12475.4
03:48:00	8.15833	12432.1
03:58:00	8.16528	12370.1
04:08:00	8.17222	12268.9
04:18:00	8.17917	12142.1
04:28:00	8.18611	12096.6
04:38:00	8.19306	12003.3
04:48:00	8.2	11928.5
04:58:00	8.20694	11847.8
05:08:00	8.21389	11772.9
05:18:00	8.22083	11665.5
05:28:00	8.22778	11591.3
05:38:00	8.23472	11500.9
05:48:00	8.24167	11440.4
05:58:00	8.24861	11343.4
06:08:00	8.25556	11243.9
06:18:00	8.2625	11152.2
06:28:00	8.26944	11096
06:38:00	8.27639	11012.2
06:48:00	8.28333	10919.3
06:58:00	8.29028	10853.1
07:08:00	8.29722	10787.3
07:18:00	8.30417	10709.1
07:28:00	8.31111	10638
07:38:00	8.31806	10563.7
07:48:00	8.325	10482.4
07:58:00	8.33194	10404.2
08:08:00	8.33889	10331
08:18:00	8.34583	10248.2
08:28:00	8.35278	10209.5
08:38:00	8.35972	10145.7
08:48:00	8.36667	10073.4
08:58:00	8.37361	9993.49
09:08:00	8.38056	9920.65
09:18:00	8.3875	9844.47
09:28:00	8.39444	9762.99
09:38:00	8.40139	9682.31
09:48:00	8.40833	9614.57
09:58:00	8.41528	9578.96
10:08:00	8.42222	9506.62
10:18:00	8.42917	9457.59
10:28:00	8.43611	9383.22
10:38:00	8.44306	9317.46
10:48:00	8.45	9273.48
10:58:00	8.45694	9171.16
11:08:00	8.46389	9125.17
11:18:00	8.47083	9065.84
11:28:00	8.47778	9017.26
11:38:00	8.48472	8959.71
11:48:00	8.49167	8893.26
11:58:00	8.49861	8822.83
12:08:00	8.50556	8783.29
12:18:00	8.5125	8718.66
12:28:00	8.51944	8669.41
12:38:00	8.52639	8623.83
12:48:00	8.53333	8548.85
12:58:00	8.54028	8510.22
13:08:00	8.54722	8430.79
13:18:00	8.55417	8392.05
13:28:00	8.56111	8330.5
13:38:00	8.56806	8299.02
13:48:00	8.575	8226.89
13:58:00	8.58194	8197.02
14:08:00	8.58889	8143.21
14:18:00	8.59583	8100.93
14:28:00	8.60278	8067.36
14:38:00	8.60972	7996.39
14:48:00	8.61667	7970.08
14:58:00	8.62361	7942.19
15:08:00	8.63056	7906.17
15:18:00	8.6375	7850.29
15:28:00	8.64444	7817.65
15:38:00	8.65139	7756.22
15:48:00	8.65833	7742.03
15:58:00	8.66528	7695.41
16:08:00	8.67222	7656.17
16:18:00	8.67917	7619.91
16:28:00	8.68611	7584.89
16:38:00	8.69306	7557.11
16:48:00	8.7	7495.51
16:58:00	8.70694	7490.98
17:08:00	8.71389	7447.4
17:18:00	8.72083	7400.78
17:28:00	8.72778	7371.92
17:38:00	8.73472	7330.79
17:48:00	8.74167	7302.17
17:58:00	8.74861	7293.84
18:08:00	8.75556	7236.2
18:18:00	8.7625	7220.62
18:28:00	8.76944	7206.88
18:38:00	8.77639	7165.33
18:48:00	8.78333	7132.14
18:58:00	8.79028	7109.62
19:08:00	8.79722	7072.57
19:18:00	8.80417	7054.39
19:28:00	8.81111	7006.13
19:38:00	8.81806	6976.1
19:48:00	8.825	6973.62
19:58:00	8.83194	6953.61
20:08:00	8.83889	6914.19
20:18:00	8.84583	6886.5
20:28:00	8.85278	6871.87
20:38:00	8.85972	6889.19
20:48:00	8.86667	6830.39
20:58:00	8.87361	6813.55
21:08:00	8.88056	6811.87
21:18:00	8.8875	6745.12
21:28:00	8.89444	6707.53
21:38:00	8.90139	6701.43
21:48:00	8.90833	6679.56
21:58:00	8.91528	6659.61
22:08:00	8.92222	6630.16
22:18:00	8.92917	6626.09
22:28:00	8.93611	6612.53
22:38:00	8.94306	6591.43
22:48:00	8.95	6608.68
22:58:00	8.95694	6588.17
23:08:00	8.96389	6554.37
23:18:00	8.97083	6544.5
23:28:00	8.97778	6527.81
23:38:00	8.98472	6534.66
23:48:00	8.99167	6521.38
23:58:00	8.99861	6498.06
00:08:00	9.00556	6486.64
00:18:00	9.0125	6475.55
00:28:00	9.01944	6477.96
00:38:00	9.02639	6479.17
00:48:00	9.03333	6476.86

## Sheet: WT-normalized data
LumiCycle: WT (Baseline subtracted)
Time (hr:min)	Time (days)	counts/sec
17:16:00	0.99722	1237.22
17:26:00	1.00417	1107.81
17:36:00	1.01111	985.571
17:46:00	1.01806	815.23
17:56:00	1.025	700.091
18:06:00	1.03194	576.167
18:16:00	1.03889	473.311
18:26:00	1.04583	332.282
18:36:00	1.05278	270.459
18:46:00	1.05972	132.465
18:56:00	1.06667	71.912
19:06:00	1.07361	-47.992
19:16:00	1.08056	-113.195
19:26:00	1.0875	-233.714
19:36:00	1.09444	-330.526
19:46:00	1.10139	-415.033
19:56:00	1.10833	-474.468
20:06:00	1.11528	-521.889
20:16:00	1.12222	-598.95
20:26:00	1.12917	-657.008
20:36:00	1.13611	-753.298
20:46:00	1.14306	-802.207
20:56:00	1.15	-866.51
21:06:00	1.15694	-894.272
21:16:00	1.16389	-953.586
21:26:00	1.17083	-1014.17
21:36:00	1.17778	-1063.52
21:46:00	1.18472	-1124.44
21:56:00	1.19167	-1173.82
22:06:00	1.19861	-1213.28
22:16:00	1.20556	-1241.72
22:26:00	1.2125	-1273.29
22:36:00	1.21944	-1304.88
22:46:00	1.22639	-1324.69
22:56:00	1.23333	-1381.15
23:06:00	1.24028	-1399.62
23:16:00	1.24722	-1447.11
23:26:00	1.25417	-1444.59
23:36:00	1.26111	-1471.59
23:46:00	1.26806	-1515.16
23:56:00	1.275	-1530.8
00:06:00	1.28194	-1548.96
00:16:00	1.28889	-1550.87
00:26:00	1.29583	-1587.12
00:36:00	1.30278	-1590.61
00:46:00	1.30972	-1575.04
00:56:00	1.31667	-1622.62
01:06:00	1.32361	-1627.53
01:16:00	1.33056	-1632.55
01:26:00	1.3375	-1653.8
01:36:00	1.34444	-1627.41
01:46:00	1.35139	-1631.12
01:56:00	1.35833	-1630.1
02:06:00	1.36528	-1617.15
02:16:00	1.37222	-1596.57
02:26:00	1.37917	-1597.48
02:36:00	1.38611	-1591.85
02:46:00	1.39306	-1577.42
02:56:00	1.4	-1551.53
03:06:00	1.40694	-1522.36
03:16:00	1.41389	-1494.17
03:26:00	1.42083	-1483.61
03:36:00	1.42778	-1417.46
03:46:00	1.43472	-1405.22
03:56:00	1.44167	-1370
04:06:00	1.44861	-1303.13
04:16:00	1.45556	-1281.01
04:26:00	1.4625	-1234.51
04:36:00	1.46944	-1162.16
04:46:00	1.47639	-1133.02
04:56:00	1.48333	-1069.14
05:06:00	1.49028	-1000.21
05:16:00	1.49722	-939.694
05:26:00	1.50417	-874.6
05:36:00	1.51111	-787.106
05:46:00	1.51806	-705.37
05:56:00	1.525	-631.77
06:06:00	1.53194	-566.169
06:16:00	1.53889	-511.914
06:26:00	1.54583	-437.058
06:36:00	1.55278	-334.197
06:46:00	1.55972	-254.449
06:56:00	1.56667	-154.676
07:06:00	1.57361	-82.525
07:16:00	1.58056	-28.113
07:26:00	1.5875	51.285
07:36:00	1.59444	150.3
07:46:00	1.60139	240.666
07:56:00	1.60833	289.165
08:06:00	1.61528	364.238
08:16:00	1.62222	445.223
08:26:00	1.62917	496.647
08:36:00	1.63611	592.364
08:46:00	1.64306	663.478
08:56:00	1.65	687.234
09:06:00	1.65694	799.646
09:16:00	1.66389	855.805
09:26:00	1.67083	891.018
09:36:00	1.67778	959.316
09:46:00	1.68472	988.156
09:56:00	1.69167	1075.4
10:06:00	1.69861	1095.69
10:16:00	1.70556	1127.73
10:26:00	1.7125	1147.53
10:36:00	1.71944	1208.78
10:46:00	1.72639	1237.38
10:56:00	1.73333	1246.09
11:06:00	1.74028	1300.19
11:16:00	1.74722	1313.79
11:26:00	1.75417	1309.64
11:36:00	1.76111	1331.12
11:46:00	1.76806	1335.93
11:56:00	1.775	1367.97
12:06:00	1.78194	1373.91
12:16:00	1.78889	1373.01
12:26:00	1.79583	1350.83
12:36:00	1.80278	1353.94
12:46:00	1.80972	1339.5
12:56:00	1.81667	1319.84
13:06:00	1.82361	1294.87
13:16:00	1.83056	1271.55
13:26:00	1.8375	1248.76
13:36:00	1.84444	1222.94
13:46:00	1.85139	1193.87
13:56:00	1.85833	1165.8
14:06:00	1.86528	1126.04
14:16:00	1.87222	1102.71
14:26:00	1.87917	1066.34
14:36:00	1.88611	1025.51
14:46:00	1.89306	968.063
14:56:00	1.9	914.866
15:06:00	1.90694	884.285
15:16:00	1.91389	856.567
15:26:00	1.92083	776.206
15:36:00	1.92778	725.878
15:46:00	1.93472	703.058
15:56:00	1.94167	615.546
16:06:00	1.94861	552.807
16:16:00	1.95556	528.077
16:26:00	1.9625	452.06
16:36:00	1.96944	423.119
16:46:00	1.97639	304.819
16:56:00	1.98333	273.957
17:06:00	1.99028	235.447
17:16:00	1.99722	141.679
17:26:00	2.00417	75.487
17:36:00	2.01111	23.834
17:46:00	2.01806	-68.394
17:56:00	2.025	-122.197
18:06:00	2.03194	-162.581
18:16:00	2.03889	-195.345
18:26:00	2.04583	-308.005
18:36:00	2.05278	-378.351
18:46:00	2.05972	-462.617
18:56:00	2.06667	-518.62
19:06:00	2.07361	-586.663
19:16:00	2.08056	-615.495
19:26:00	2.0875	-682.739
19:36:00	2.09444	-767.365
19:46:00	2.10139	-819.801
19:56:00	2.10833	-869.778
20:06:00	2.11528	-914.994
20:16:00	2.12222	-976.28
20:26:00	2.12917	-1057.17
20:36:00	2.13611	-1110.03
20:46:00	2.14306	-1153.09
20:56:00	2.15	-1204
21:06:00	2.15694	-1257.37
21:16:00	2.16389	-1312.55
21:26:00	2.17083	-1337.41
21:36:00	2.17778	-1408.48
21:46:00	2.18472	-1442.65
21:56:00	2.19167	-1492.69
22:06:00	2.19861	-1523.28
22:16:00	2.20556	-1555
22:26:00	2.2125	-1587.46
22:36:00	2.21944	-1618.49
22:46:00	2.22639	-1648.64
22:56:00	2.23333	-1670.68
23:06:00	2.24028	-1692.49
23:16:00	2.24722	-1701.27
23:26:00	2.25417	-1700.02
23:36:00	2.26111	-1735.36
23:46:00	2.26806	-1730.89
23:56:00	2.275	-1759.89
00:06:00	2.28194	-1772.55
00:16:00	2.28889	-1754.97
00:26:00	2.29583	-1757.92
00:36:00	2.30278	-1713.69
00:46:00	2.30972	-1712.91
00:56:00	2.31667	-1686.59
01:06:00	2.32361	-1673.83
01:16:00	2.33056	-1630.61
01:26:00	2.3375	-1601.1
01:36:00	2.34444	-1568.48
01:46:00	2.35139	-1521.84
01:56:00	2.35833	-1462.69
02:06:00	2.36528	-1411.27
02:16:00	2.37222	-1375.36
02:26:00	2.37917	-1325.23
02:36:00	2.38611	-1241.38
02:46:00	2.39306	-1182.91
02:56:00	2.4	-1089.33
03:06:00	2.40694	-1018.72
03:16:00	2.41389	-931.814
03:26:00	2.42083	-822.374
03:36:00	2.42778	-736.043
03:46:00	2.43472	-613.049
03:56:00	2.44167	-524.583
04:06:00	2.44861	-414.654
04:16:00	2.45556	-300.15
04:26:00	2.4625	-198.962
04:36:00	2.46944	-63.339
04:46:00	2.47639	9.967
04:56:00	2.48333	146.488
05:06:00	2.49028	252.67
05:16:00	2.49722	393.882
05:26:00	2.50417	498.08
05:36:00	2.51111	622.977
05:46:00	2.51806	727.928
05:56:00	2.525	843.584
06:06:00	2.53194	974.689
06:16:00	2.53889	1089.6
06:26:00	2.54583	1209.94
06:36:00	2.55278	1275.19
06:46:00	2.55972	1458.87
06:56:00	2.56667	1554.74
07:06:00	2.57361	1622.75
07:16:00	2.58056	1697.14
07:26:00	2.5875	1793.04
07:36:00	2.59444	1881.88
07:46:00	2.60139	2002.15
07:56:00	2.60833	2077.92
08:06:00	2.61528	2126.58
08:16:00	2.62222	2191.76
08:26:00	2.62917	2282.88
08:36:00	2.63611	2281.39
08:46:00	2.64306	2333.61
08:56:00	2.65	2361.02
09:06:00	2.65694	2380.37
09:16:00	2.66389	2387.03
09:26:00	2.67083	2378.02
09:36:00	2.67778	2371.82
09:46:00	2.68472	2372.48
09:56:00	2.69167	2372.34
10:06:00	2.69861	2382.7
10:16:00	2.70556	2345.35
10:26:00	2.7125	2312.68
10:36:00	2.71944	2267.6
10:46:00	2.72639	2255.48
10:56:00	2.73333	2153.58
11:06:00	2.74028	2073.2
11:16:00	2.74722	1991.8
11:26:00	2.75417	1948.57
11:36:00	2.76111	1838.8
11:46:00	2.76806	1736.73
11:56:00	2.775	1657.59
12:06:00	2.78194	1552.42
12:16:00	2.78889	1465.82
12:26:00	2.79583	1379.44
12:36:00	2.80278	1332.43
12:46:00	2.80972	1170.85
12:56:00	2.81667	1090.57
13:06:00	2.82361	983.834
13:16:00	2.83056	875.856
13:26:00	2.8375	738.201
13:36:00	2.84444	654.557
13:46:00	2.85139	507.888
13:56:00	2.85833	422.999
14:06:00	2.86528	295.263
14:16:00	2.87222	161.186
14:26:00	2.87917	71.849
14:36:00	2.88611	-29.785
14:46:00	2.89306	-150.485
14:56:00	2.9	-285.595
15:06:00	2.90694	-394.858
15:16:00	2.91389	-491.552
15:26:00	2.92083	-594.198
15:36:00	2.92778	-718.044
15:46:00	2.93472	-797.721
15:56:00	2.94167	-931.125
16:06:00	2.94861	-1025.12
16:16:00	2.95556	-1126.73
16:26:00	2.9625	-1220.97
16:36:00	2.96944	-1317.12
16:46:00	2.97639	-1397.63
16:56:00	2.98333	-1512.11
17:06:00	2.99028	-1585.45
17:16:00	2.99722	-1663.79
17:26:00	3.00417	-1768.7
17:36:00	3.01111	-1841.72
17:46:00	3.01806	-1922.91
17:56:00	3.025	-2038
18:06:00	3.03194	-2111.64
18:16:00	3.03889	-2168.57
18:26:00	3.04583	-2213.8
18:36:00	3.05278	-2305.89
18:46:00	3.05972	-2373.9
18:56:00	3.06667	-2396.31
19:06:00	3.07361	-2448.89
19:16:00	3.08056	-2507.89
19:26:00	3.0875	-2542.79
19:36:00	3.09444	-2557.51
19:46:00	3.10139	-2629.23
19:56:00	3.10833	-2669.61
20:06:00	3.11528	-2727.53
20:16:00	3.12222	-2786.17
20:26:00	3.12917	-2768.89
20:36:00	3.13611	-2812.77
20:46:00	3.14306	-2816.57
20:56:00	3.15	-2814.49
21:06:00	3.15694	-2833.21
21:16:00	3.16389	-2827.47
21:26:00	3.17083	-2823.67
21:36:00	3.17778	-2828
21:46:00	3.18472	-2827.41
21:56:00	3.19167	-2793.18
22:06:00	3.19861	-2784
22:16:00	3.20556	-2736.56
22:26:00	3.2125	-2672.69
22:36:00	3.21944	-2642.33
22:46:00	3.22639	-2626.01
22:56:00	3.23333	-2548.71
23:06:00	3.24028	-2491.45
23:16:00	3.24722	-2405.52
23:26:00	3.25417	-2336.63
23:36:00	3.26111	-2235.86
23:46:00	3.26806	-2190.7
23:56:00	3.275	-2061.59
00:06:00	3.28194	-1977.59
00:16:00	3.28889	-1861.56
00:26:00	3.29583	-1766.52
00:36:00	3.30278	-1647.43
00:46:00	3.30972	-1445.55
00:56:00	3.31667	-1329.86
01:06:00	3.32361	-1183.98
01:16:00	3.33056	-1019.64
01:26:00	3.3375	-859.592
01:36:00	3.34444	-664.218
01:46:00	3.35139	-458.817
01:56:00	3.35833	-297.253
02:06:00	3.36528	-159.404
02:16:00	3.37222	34.572
02:26:00	3.37917	158.398
02:36:00	3.38611	377.897
02:46:00	3.39306	553.928
02:56:00	3.4	774.385
03:06:00	3.40694	922.93
03:16:00	3.41389	1176.42
03:26:00	3.42083	1224.22
03:36:00	3.42778	1452.9
03:46:00	3.43472	1651.47
03:56:00	3.44167	1780.51
04:06:00	3.44861	1980.47
04:16:00	3.45556	2252.24
04:26:00	3.4625	2394.41
04:36:00	3.46944	2611.54
04:46:00	3.47639	2804.36
04:56:00	3.48333	2913.81
05:06:00	3.49028	3014.62
05:16:00	3.49722	3126.14
05:26:00	3.50417	3215.61
05:36:00	3.51111	3445.45
05:46:00	3.51806	3576.99
05:56:00	3.525	3689.62
06:06:00	3.53194	3780.81
06:16:00	3.53889	3819.53
06:26:00	3.54583	3933.54
06:36:00	3.55278	3973.05
06:46:00	3.55972	3954.18
06:56:00	3.56667	4054.26
07:06:00	3.57361	4156.19
07:16:00	3.58056	4108.07
07:26:00	3.5875	4041.05
07:36:00	3.59444	4064.48
07:46:00	3.60139	4037.94
07:56:00	3.60833	4032.63
08:06:00	3.61528	3909.36
08:16:00	3.62222	3836.84
08:26:00	3.62917	3829.61
08:36:00	3.63611	3728.61
08:46:00	3.64306	3679.29
08:56:00	3.65	3575.65
09:06:00	3.65694	3400
09:16:00	3.66389	3376.89
09:26:00	3.67083	3225.93
09:36:00	3.67778	3028.07
09:46:00	3.68472	3004.33
09:56:00	3.69167	2805.43
10:06:00	3.69861	2503.4
10:16:00	3.70556	2286.9
10:26:00	3.7125	2229.07
10:36:00	3.71944	1989.74
10:46:00	3.72639	1776.71
10:56:00	3.73333	1641.34
11:06:00	3.74028	1639.54
11:16:00	3.74722	1363.02
11:26:00	3.75417	1214.68
11:36:00	3.76111	1070.29
11:46:00	3.76806	868.243
11:56:00	3.775	639.021
12:06:00	3.78194	555.62
12:16:00	3.78889	277.141
12:26:00	3.79583	135.915
12:36:00	3.80278	50.153
12:46:00	3.80972	-195.13
12:56:00	3.81667	-408.087
13:06:00	3.82361	-591.43
13:16:00	3.83056	-788.66
13:26:00	3.8375	-880.143
13:36:00	3.84444	-996.898
13:46:00	3.85139	-1172.02
13:56:00	3.85833	-1330.64
14:06:00	3.86528	-1567.58
14:16:00	3.87222	-1677.82
14:26:00	3.87917	-1919.85
14:36:00	3.88611	-2032.15
14:46:00	3.89306	-2206.95
14:56:00	3.9	-2298.85
15:06:00	3.90694	-2426.77
15:16:00	3.91389	-2530.53
15:26:00	3.92083	-2634
15:36:00	3.92778	-2666.09
15:46:00	3.93472	-2811.1
15:56:00	3.94167	-2909.05
16:06:00	3.94861	-3022.23
16:16:00	3.95556	-3101.13
16:26:00	3.9625	-3236.3
16:36:00	3.96944	-3382.08
16:46:00	3.97639	-3433.07
16:56:00	3.98333	-3529.51
17:06:00	3.99028	-3624.38
17:16:00	3.99722	-3642.43
17:26:00	4.00417	-3691.06
17:36:00	4.01111	-3757.19
17:46:00	4.01806	-3798.02
17:56:00	4.025	-3888.41
18:06:00	4.03194	-3852.29
18:16:00	4.03889	-3888.45
18:26:00	4.04583	-3861
18:36:00	4.05278	-3921.26
18:46:00	4.05972	-3880.15
18:56:00	4.06667	-3939.99
19:06:00	4.07361	-3912.88
19:16:00	4.08056	-3828.38
19:26:00	4.0875	-3802.57
19:36:00	4.09444	-3723.23
19:46:00	4.10139	-3690.78
19:56:00	4.10833	-3650.9
20:06:00	4.11528	-3687.02
20:16:00	4.12222	-3599.65
20:26:00	4.12917	-3461.43
20:36:00	4.13611	-3355.84
20:46:00	4.14306	-3256.58
20:56:00	4.15	-3163.84
21:06:00	4.15694	-3090.85
21:16:00	4.16389	-2908.03
21:26:00	4.17083	-2785.11
21:36:00	4.17778	-2663.61
21:46:00	4.18472	-2499.33
21:56:00	4.19167	-2402.19
22:06:00	4.19861	-2166.86
22:16:00	4.20556	-2039.58
22:26:00	4.2125	-1803.08
22:36:00	4.21944	-1545.46
22:46:00	4.22639	-1466.3
22:56:00	4.23333	-1245.64
23:06:00	4.24028	-972.307
23:16:00	4.24722	-754.566
23:26:00	4.25417	-463.105
23:36:00	4.26111	-223.242
23:46:00	4.26806	6.005
23:56:00	4.275	241.477
00:06:00	4.28194	387.392
00:16:00	4.28889	628.026
00:26:00	4.29583	952.844
00:36:00	4.30278	1188.51
00:46:00	4.30972	1468.29
00:56:00	4.31667	1745.82
01:06:00	4.32361	1950.18
01:16:00	4.33056	2243.54
01:26:00	4.3375	2372.74
01:36:00	4.34444	2661.39
01:46:00	4.35139	2892.59
01:56:00	4.35833	3148.89
02:06:00	4.36528	3327.92
02:16:00	4.37222	3608.22
02:26:00	4.37917	3744.73
02:36:00	4.38611	3895.01
02:46:00	4.39306	4090.25
02:56:00	4.4	4244.19
03:06:00	4.40694	4541.65
03:16:00	4.41389	4589.26
03:26:00	4.42083	4793.6
03:36:00	4.42778	4910.53
03:46:00	4.43472	4940.54
03:56:00	4.44167	5158.76
04:06:00	4.44861	5129.3
04:16:00	4.45556	5141.98
04:26:00	4.4625	5402.04
04:36:00	4.46944	5322.3
04:46:00	4.47639	5324.58
04:56:00	4.48333	5317.98
05:06:00	4.49028	5250.04
05:16:00	4.49722	5147.22
05:26:00	4.50417	5148.76
05:36:00	4.51111	5120.6
05:46:00	4.51806	5017.24
05:56:00	4.525	4975.34
06:06:00	4.53194	4872.08
06:16:00	4.53889	4707.55
06:26:00	4.54583	4651.23
06:36:00	4.55278	4463.32
06:46:00	4.55972	4338.78
06:56:00	4.56667	4208.92
07:06:00	4.57361	3976.03
07:16:00	4.58056	3830.55
07:26:00	4.5875	3780.34
07:36:00	4.59444	3586.64
07:46:00	4.60139	3367.39
07:56:00	4.60833	3173.48
08:06:00	4.61528	2979.06
08:16:00	4.62222	2833.61
08:26:00	4.62917	2670.81
08:36:00	4.63611	2415.82
08:46:00	4.64306	2202.41
08:56:00	4.65	1882.04
09:06:00	4.65694	1600.59
09:16:00	4.66389	1433.06
09:26:00	4.67083	1164.67
09:36:00	4.67778	1070.99
09:46:00	4.68472	842.753
09:56:00	4.69167	539.678
10:06:00	4.69861	353.582
10:16:00	4.70556	123.071
10:26:00	4.7125	-111.808
10:36:00	4.71944	-348.123
10:46:00	4.72639	-497.731
10:56:00	4.73333	-759.022
11:06:00	4.74028	-951.408
11:16:00	4.74722	-1150.98
11:26:00	4.75417	-1342.68
11:36:00	4.76111	-1566.12
11:46:00	4.76806	-1712.02
11:56:00	4.775	-1852.37
12:06:00	4.78194	-2035.08
12:16:00	4.78889	-2284.15
12:26:00	4.79583	-2428.12
12:36:00	4.80278	-2607.13
12:46:00	4.80972	-2664.34
12:56:00	4.81667	-2786.94
13:06:00	4.82361	-2972.06
13:16:00	4.83056	-3097.88
13:26:00	4.8375	-3190.97
13:36:00	4.84444	-3357.1
13:46:00	4.85139	-3452.7
13:56:00	4.85833	-3556.24
14:06:00	4.86528	-3647.64
14:16:00	4.87222	-3772.61
14:26:00	4.87917	-3846.28
14:36:00	4.88611	-3887.65
14:46:00	4.89306	-4007.67
14:56:00	4.9	-4105.59
15:06:00	4.90694	-4090.52
15:16:00	4.91389	-4158.5
15:26:00	4.92083	-4141.17
15:36:00	4.92778	-4160.83
15:46:00	4.93472	-4229.54
15:56:00	4.94167	-4290.03
16:06:00	4.94861	-4290.38
16:16:00	4.95556	-4307.24
16:26:00	4.9625	-4317.36
16:36:00	4.96944	-4312.68
16:46:00	4.97639	-4249.18
16:56:00	4.98333	-4203.44
17:06:00	4.99028	-4194.07
17:16:00	4.99722	-4167.38
17:26:00	5.00417	-4060.86
17:36:00	5.01111	-4001.79
17:46:00	5.01806	-3936.39
17:56:00	5.025	-3817.94
18:06:00	5.03194	-3776.31
18:16:00	5.03889	-3717.22
18:26:00	5.04583	-3646.2
18:36:00	5.05278	-3460.35
18:46:00	5.05972	-3397.71
18:56:00	5.06667	-3284.72
19:06:00	5.07361	-3078.47
19:16:00	5.08056	-3050.1
19:26:00	5.0875	-2835.45
19:36:00	5.09444	-2648.89
19:46:00	5.10139	-2520.03
19:56:00	5.10833	-2304.8
20:06:00	5.11528	-2113.71
20:16:00	5.12222	-1926.52
20:26:00	5.12917	-1756.91
20:36:00	5.13611	-1520.25
20:46:00	5.14306	-1286.79
20:56:00	5.15	-1072.92
21:06:00	5.15694	-778.417
21:16:00	5.16389	-646.533
21:26:00	5.17083	-371.095
21:36:00	5.17778	-58.843
21:46:00	5.18472	130.69
21:56:00	5.19167	310.592
22:06:00	5.19861	582.385
22:16:00	5.20556	801.846
22:26:00	5.2125	1101.55
22:36:00	5.21944	1345.93
22:46:00	5.22639	1558.98
22:56:00	5.23333	1696.14
23:06:00	5.24028	1958.45
23:16:00	5.24722	2273.01
23:26:00	5.25417	2453.75
23:36:00	5.26111	2749.51
23:46:00	5.26806	2928.65
23:56:00	5.275	3145.64
00:06:00	5.28194	3324.73
00:16:00	5.28889	3551.13
00:26:00	5.29583	3805.51
00:36:00	5.30278	3900.94
00:46:00	5.30972	4057.53
00:56:00	5.31667	4109.37
01:06:00	5.32361	4337.52
01:16:00	5.33056	4503.5
01:26:00	5.3375	4583.46
01:36:00	5.34444	4656.26
01:46:00	5.35139	4683.74
01:56:00	5.35833	4864.15
02:06:00	5.36528	4970.49
02:16:00	5.37222	4899.85
02:26:00	5.37917	4877.78
02:36:00	5.38611	4973.87
02:46:00	5.39306	4952.14
02:56:00	5.4	4917.94
03:06:00	5.40694	4905.29
03:16:00	5.41389	4882.75
03:26:00	5.42083	4685.69
03:36:00	5.42778	4704.72
03:46:00	5.43472	4695.04
03:56:00	5.44167	4569.69
04:06:00	5.44861	4428.38
04:16:00	5.45556	4299.66
04:26:00	5.4625	4231.22
04:36:00	5.46944	4078.54
04:46:00	5.47639	3967.61
04:56:00	5.48333	3713.21
05:06:00	5.49028	3560.24
05:16:00	5.49722	3451.07
05:26:00	5.50417	3357.87
05:36:00	5.51111	3097.16
05:46:00	5.51806	2842.69
05:56:00	5.525	2792.35
06:06:00	5.53194	2544.77
06:16:00	5.53889	2324.83
06:26:00	5.54583	2123.61
06:36:00	5.55278	1915.63
06:46:00	5.55972	1702.9
06:56:00	5.56667	1589.89
07:06:00	5.57361	1365.1
07:16:00	5.58056	1034.06
07:26:00	5.5875	777.408
07:36:00	5.59444	666.517
07:46:00	5.60139	529.319
07:56:00	5.60833	171.869
08:06:00	5.61528	3.817
08:16:00	5.62222	-187.663
08:26:00	5.62917	-380.258
08:36:00	5.63611	-632.276
08:46:00	5.64306	-764.021
08:56:00	5.65	-1029.28
09:06:00	5.65694	-1141.1
09:16:00	5.66389	-1252.18
09:26:00	5.67083	-1518.87
09:36:00	5.67778	-1652.99
09:46:00	5.68472	-1771.02
09:56:00	5.69167	-2018.34
10:06:00	5.69861	-2103.06
10:16:00	5.70556	-2247.87
10:26:00	5.7125	-2432.89
10:36:00	5.71944	-2566.58
10:46:00	5.72639	-2765.1
10:56:00	5.73333	-2781.96
11:06:00	5.74028	-2918.85
11:16:00	5.74722	-3074
11:26:00	5.75417	-3203.88
11:36:00	5.76111	-3287.7
11:46:00	5.76806	-3434.28
11:56:00	5.775	-3492.61
12:06:00	5.78194	-3645.14
12:16:00	5.78889	-3647.72
12:26:00	5.79583	-3678.15
12:36:00	5.80278	-3770.34
12:46:00	5.80972	-3871.28
12:56:00	5.81667	-3846.76
13:06:00	5.82361	-3934.94
13:16:00	5.83056	-3889.79
13:26:00	5.8375	-3904.01
13:36:00	5.84444	-3944.62
13:46:00	5.85139	-3969.99
13:56:00	5.85833	-4019.14
14:06:00	5.86528	-4104.53
14:16:00	5.87222	-4053.83
14:26:00	5.87917	-4057.01
14:36:00	5.88611	-3987.87
14:46:00	5.89306	-3917.14
14:56:00	5.9	-3859.92
15:06:00	5.90694	-3814.78
15:16:00	5.91389	-3783.06
15:26:00	5.92083	-3731.53
15:36:00	5.92778	-3698.02
15:46:00	5.93472	-3623.01
15:56:00	5.94167	-3516.18
16:06:00	5.94861	-3454.25
16:16:00	5.95556	-3305.73
16:26:00	5.9625	-3286.41
16:36:00	5.96944	-3122.88
16:46:00	5.97639	-2925.27
16:56:00	5.98333	-2782.82
17:06:00	5.99028	-2680.55
17:16:00	5.99722	-2487.05
17:26:00	6.00417	-2367.77
17:36:00	6.01111	-2220.87
17:46:00	6.01806	-2028.71
17:56:00	6.025	-1911.16
18:06:00	6.03194	-1742.14
18:16:00	6.03889	-1554.95
18:26:00	6.04583	-1309.68
18:36:00	6.05278	-1098.88
18:46:00	6.05972	-1011.78
18:56:00	6.06667	-834.579
19:06:00	6.07361	-508.436
19:16:00	6.08056	-310.545
19:26:00	6.0875	-30.497
19:36:00	6.09444	180.22
19:46:00	6.10139	259.073
19:56:00	6.10833	559.176
20:06:00	6.11528	761.944
20:16:00	6.12222	990.587
20:26:00	6.12917	1237.15
20:36:00	6.13611	1433.86
20:46:00	6.14306	1658.99
20:56:00	6.15	1919.52
21:06:00	6.15694	2060.72
21:16:00	6.16389	2269.26
21:26:00	6.17083	2479.19
21:36:00	6.17778	2516.08
21:46:00	6.18472	2742.9
21:56:00	6.19167	2886.24
22:06:00	6.19861	3232.14
22:16:00	6.20556	3449.68
22:26:00	6.2125	3428.3
22:36:00	6.21944	3546.47
22:46:00	6.22639	3785
22:56:00	6.23333	3857.21
23:06:00	6.24028	3999.2
23:16:00	6.24722	4079.31
23:26:00	6.25417	4223.46
23:36:00	6.26111	4291.7
23:46:00	6.26806	4352.11
23:56:00	6.275	4355.05
00:06:00	6.28194	4323.44
00:16:00	6.28889	4275.85
00:26:00	6.29583	4308.53
00:36:00	6.30278	4348.59
00:46:00	6.30972	4298.09
00:56:00	6.31667	4214.8
01:06:00	6.32361	4266.36
01:16:00	6.33056	4232.65
01:26:00	6.3375	4287.66
01:36:00	6.34444	4163.71
01:46:00	6.35139	4058.44
01:56:00	6.35833	4115.71
02:06:00	6.36528	3844.52
02:16:00	6.37222	3778.09
02:26:00	6.37917	3614.33
02:36:00	6.38611	3372.43
02:46:00	6.39306	3414.13
02:56:00	6.4	3423.46
03:06:00	6.40694	3089.97
03:16:00	6.41389	3002.63
03:26:00	6.42083	2851.39
03:36:00	6.42778	2685.08
03:46:00	6.43472	2487.24
03:56:00	6.44167	2405.45
04:06:00	6.44861	2127.83
04:16:00	6.45556	1888.32
04:26:00	6.4625	1807.36
04:36:00	6.46944	1575.42
04:46:00	6.47639	1308.42
04:56:00	6.48333	1046.15
05:06:00	6.49028	974.713
05:16:00	6.49722	771.776
05:26:00	6.50417	616.604
05:36:00	6.51111	556.807
05:46:00	6.51806	395.266
05:56:00	6.525	241.966
06:06:00	6.53194	51.321
06:16:00	6.53889	-217.679
06:26:00	6.54583	-317.141
06:36:00	6.55278	-572.833
06:46:00	6.55972	-869.115
06:56:00	6.56667	-975.014
07:06:00	6.57361	-1178.15
07:16:00	6.58056	-1337.82
07:26:00	6.5875	-1415.6
07:36:00	6.59444	-1503.88
07:46:00	6.60139	-1744.84
07:56:00	6.60833	-1891.76
08:06:00	6.61528	-2034.96
08:16:00	6.62222	-2115
08:26:00	6.62917	-2285.34
08:36:00	6.63611	-2376.1
08:46:00	6.64306	-2445.68
08:56:00	6.65	-2613.28
09:06:00	6.65694	-2693.35
09:16:00	6.66389	-2764.97
09:26:00	6.67083	-2920.84
09:36:00	6.67778	-3085.58
09:46:00	6.68472	-3075.51
09:56:00	6.69167	-3101.09
10:06:00	6.69861	-3196.16
10:16:00	6.70556	-3168.82
10:26:00	6.7125	-3339.15
10:36:00	6.71944	-3363.29
10:46:00	6.72639	-3378.22
10:56:00	6.73333	-3333.51
11:06:00	6.74028	-3472.81
11:16:00	6.74722	-3624.13
11:26:00	6.75417	-3523.44
11:36:00	6.76111	-3452.86
11:46:00	6.76806	-3569.62
11:56:00	6.775	-3587.55
12:06:00	6.78194	-3556.59
12:16:00	6.78889	-3401.89
12:26:00	6.79583	-3515.89
12:36:00	6.80278	-3511.47
12:46:00	6.80972	-3422.67
12:56:00	6.81667	-3349.54
13:06:00	6.82361	-3309.68
13:16:00	6.83056	-3265.17
13:26:00	6.8375	-3104.95
13:36:00	6.84444	-3081.01
13:46:00	6.85139	-3057.8
13:56:00	6.85833	-2976.18
14:06:00	6.86528	-2824.96
14:16:00	6.87222	-2750.66
14:26:00	6.87917	-2597.76
14:36:00	6.88611	-2448.96
14:46:00	6.89306	-2368.79
14:56:00	6.9	-2242.99
15:06:00	6.90694	-1995.89
15:16:00	6.91389	-1895.43
15:26:00	6.92083	-1809.18
15:36:00	6.92778	-1722.71
15:46:00	6.93472	-1496.17
15:56:00	6.94167	-1361.16
16:06:00	6.94861	-1236.35
16:16:00	6.95556	-1035.33
16:26:00	6.9625	-764.373
16:36:00	6.96944	-616.642
16:46:00	6.97639	-406.211
16:56:00	6.98333	-285.505
17:06:00	6.99028	-107.403
17:16:00	6.99722	101.644
17:26:00	7.00417	323.702
17:36:00	7.01111	397.141
17:46:00	7.01806	592.799
17:56:00	7.025	789.092
18:06:00	7.03194	960.43
18:16:00	7.03889	1065.35
18:26:00	7.04583	1273.29
18:36:00	7.05278	1586.04
18:46:00	7.05972	1722.2
18:56:00	7.06667	1802.8
19:06:00	7.07361	1977.81
19:16:00	7.08056	2133.37
19:26:00	7.0875	2311.93
19:36:00	7.09444	2551.18
19:46:00	7.10139	2633.54
19:56:00	7.10833	2719.91
20:06:00	7.11528	2929.11
20:16:00	7.12222	2998.89
20:26:00	7.12917	3030.86
20:36:00	7.13611	3145.22
20:46:00	7.14306	3251.01
20:56:00	7.15	3354.68
21:06:00	7.15694	3409.68
21:16:00	7.16389	3433.5
21:26:00	7.17083	3481.24
21:36:00	7.17778	3524.72
21:46:00	7.18472	3684.89
21:56:00	7.19167	3655.16
22:06:00	7.19861	3578.89
22:16:00	7.20556	3731.95
22:26:00	7.2125	3721.07
22:36:00	7.21944	3504.62
22:46:00	7.22639	3603.63
22:56:00	7.23333	3528.36
23:06:00	7.24028	3512.72
23:16:00	7.24722	3381.51
23:26:00	7.25417	3353.28
23:36:00	7.26111	3378.45
23:46:00	7.26806	3191.46
23:56:00	7.275	3164.77
00:06:00	7.28194	3040.36
00:16:00	7.28889	3018.46
00:26:00	7.29583	2864
00:36:00	7.30278	2757.37
00:46:00	7.30972	2550.3
00:56:00	7.31667	2364.51
01:06:00	7.32361	2295.02
01:16:00	7.33056	2219.98
01:26:00	7.3375	2098.33
01:36:00	7.34444	2009.13
01:46:00	7.35139	1768.5
01:56:00	7.35833	1644.63
02:06:00	7.36528	1505.75
02:16:00	7.37222	1417.83
02:26:00	7.37917	1187.01
02:36:00	7.38611	1067.6
02:46:00	7.39306	888.798
02:56:00	7.4	723.706
03:06:00	7.40694	521.596
03:16:00	7.41389	407.939
03:26:00	7.42083	257.504
03:36:00	7.42778	226.314
03:46:00	7.43472	-18.891
03:56:00	7.44167	-180.879
04:06:00	7.44861	-338.157
04:16:00	7.45556	-455.78
04:26:00	7.4625	-558.409
04:36:00	7.46944	-679.342
04:46:00	7.47639	-852.959
04:56:00	7.48333	-1036.62
05:06:00	7.49028	-1140.61
05:16:00	7.49722	-1274.1
05:26:00	7.50417	-1370.49
05:36:00	7.51111	-1435.29
05:46:00	7.51806	-1578.11
05:56:00	7.525	-1707.26
06:06:00	7.53194	-1852.8
06:16:00	7.53889	-1889.38
06:26:00	7.54583	-2047.82
06:36:00	7.55278	-2105.89
06:46:00	7.55972	-2190.32
06:56:00	7.56667	-2311.46
07:06:00	7.57361	-2384.74
07:16:00	7.58056	-2474.53
07:26:00	7.5875	-2530.94
07:36:00	7.59444	-2537.86
07:46:00	7.60139	-2632.68
07:56:00	7.60833	-2713.52
08:06:00	7.61528	-2731.57
08:16:00	7.62222	-2714.91
08:26:00	7.62917	-2783.92
08:36:00	7.63611	-2806.56
08:46:00	7.64306	-2844.07
08:56:00	7.65	-2821.08
09:06:00	7.65694	-2859.91
09:16:00	7.66389	-2902.49
09:26:00	7.67083	-2831.32
09:36:00	7.67778	-2869.81
09:46:00	7.68472	-2850.36
09:56:00	7.69167	-2890.44
10:06:00	7.69861	-2869.83
10:16:00	7.70556	-2802.07
10:26:00	7.7125	-2807.77
10:36:00	7.71944	-2686.24
10:46:00	7.72639	-2683.19
10:56:00	7.73333	-2589.88
11:06:00	7.74028	-2539.31
11:16:00	7.74722	-2476.22
11:26:00	7.75417	-2361.91
11:36:00	7.76111	-2298.84
11:46:00	7.76806	-2166.59
11:56:00	7.775	-2148.69
12:06:00	7.78194	-2063.63
12:16:00	7.78889	-1984.02
12:26:00	7.79583	-1857.39
12:36:00	7.80278	-1701.25
12:46:00	7.80972	-1653.3
12:56:00	7.81667	-1570.22
13:06:00	7.82361	-1379.48
13:16:00	7.83056	-1232.31
13:26:00	7.8375	-1203.32
13:36:00	7.84444	-1058.59
13:46:00	7.85139	-842.403
13:56:00	7.85833	-737.389
14:06:00	7.86528	-588.506
14:16:00	7.87222	-440.775
14:26:00	7.87917	-283.436
14:36:00	7.88611	-139.009
14:46:00	7.89306	-17.913
14:56:00	7.9	137.012
15:06:00	7.90694	220.107
15:16:00	7.91389	329.763
15:26:00	7.92083	513.48
15:36:00	7.92778	702.953
15:46:00	7.93472	806.996
15:56:00	7.94167	929.007
16:06:00	7.94861	1174.4
16:16:00	7.95556	1213.23
16:26:00	7.9625	1346.29
16:36:00	7.96944	1479.39
16:46:00	7.97639	1681.19
16:56:00	7.98333	1734.89
17:06:00	7.99028	1790.07
17:16:00	7.99722	1925.25
17:26:00	8.00417	2134.06
17:36:00	8.01111	2313.15
17:46:00	8.01806	2238.66
17:56:00	8.025	2364.61
18:06:00	8.03194	2459.63
18:16:00	8.03889	2552.76
18:26:00	8.04583	2543.38
18:36:00	8.05278	2723.97
18:46:00	8.05972	2727.65
18:56:00	8.06667	2661.9
19:06:00	8.07361	2714.8
19:16:00	8.08056	2707.24
19:26:00	8.0875	2833.06
19:36:00	8.09444	2817.31
19:46:00	8.10139	2774.85
19:56:00	8.10833	2855.78
20:06:00	8.11528	2837.67
20:16:00	8.12222	2912.63
20:26:00	8.12917	2698.9
20:36:00	8.13611	2768.72
20:46:00	8.14306	2703.21
20:56:00	8.15	2705.04
21:06:00	8.15694	2649.66
21:16:00	8.16389	2577.94
21:26:00	8.17083	2477.47
21:36:00	8.17778	2466.24
21:46:00	8.18472	2325.03
21:56:00	8.19167	2300.76
22:06:00	8.19861	2195.63
22:16:00	8.20556	2132.44
22:26:00	8.2125	2080.55
22:36:00	8.21944	1902.04
22:46:00	8.22639	1919.58
22:56:00	8.23333	1722.8
23:06:00	8.24028	1607.38
23:16:00	8.24722	1557.57
23:26:00	8.25417	1415.55
23:36:00	8.26111	1344.43
23:46:00	8.26806	1224.25
23:56:00	8.275	1014.15
00:06:00	8.28194	994.381
00:16:00	8.28889	832.141
00:26:00	8.29583	748.826
00:36:00	8.30278	658.627
00:46:00	8.30972	554.902
00:56:00	8.31667	401.57
01:06:00	8.32361	260.057
01:16:00	8.33056	180.174
01:26:00	8.3375	109.137
01:36:00	8.34444	-10.629
01:46:00	8.35139	-163.843
01:56:00	8.35833	-209.408
02:06:00	8.36528	-352.985
02:16:00	8.37222	-482.379
02:26:00	8.37917	-570.817
02:36:00	8.38611	-676.086
02:46:00	8.39306	-783.144
02:56:00	8.4	-935.515
03:06:00	8.40694	-928.949
03:16:00	8.41389	-1032.98
03:26:00	8.42083	-1156.9
03:36:00	8.42778	-1229.11
03:46:00	8.43472	-1292.01
03:56:00	8.44167	-1394.07
04:06:00	8.44861	-1441.3
04:16:00	8.45556	-1492.59
04:26:00	8.4625	-1525.16
04:36:00	8.46944	-1682.92
04:46:00	8.47639	-1724.45
04:56:00	8.48333	-1770.09
05:06:00	8.49028	-1868.97
05:16:00	8.49722	-1890.65
05:26:00	8.50417	-1918.64
05:36:00	8.51111	-1908.84
05:46:00	8.51806	-1944.24
05:56:00	8.525	-2016.12
06:06:00	8.53194	-2055.61
06:16:00	8.53889	-2067.96
06:26:00	8.54583	-2082.7
06:36:00	8.55278	-2105.1
06:46:00	8.55972	-2136.1
06:56:00	8.56667	-2087.31
07:06:00	8.57361	-2149.6
07:16:00	8.58056	-2203.66
07:26:00	8.5875	-2137.67
07:36:00	8.59444	-2142.35
07:46:00	8.60139	-2119.36
07:56:00	8.60833	-2073.89
08:06:00	8.61528	-2072.14
08:16:00	8.62222	-2038.35
08:26:00	8.62917	-2034.66
08:36:00	8.63611	-1939.24
08:46:00	8.64306	-1934.09
08:56:00	8.65	-1913.3
09:06:00	8.65694	-1826.29
09:16:00	8.66389	-1819.27
09:26:00	8.67083	-1781.65
09:36:00	8.67778	-1752.01
09:46:00	8.68472	-1736.65
09:56:00	8.69167	-1547.23
10:06:00	8.69861	-1524.92
10:16:00	8.70556	-1472.63
10:26:00	8.7125	-1356.54
10:36:00	8.71944	-1354.38
10:46:00	8.72639	-1254.86
10:56:00	8.73333	-1212.1
11:06:00	8.74028	-1162.58
11:16:00	8.74722	-1074.75
11:26:00	8.75417	-975.739
11:36:00	8.76111	-895.635
11:46:00	8.76806	-863.791
11:56:00	8.775	-805.4
12:06:00	8.78194	-693.509
12:16:00	8.78889	-654.757
12:26:00	8.79583	-459.997
12:36:00	8.80278	-438.424
12:46:00	8.80972	-408.966
12:56:00	8.81667	-261.065
13:06:00	8.82361	-230.512
13:16:00	8.83056	-131.155
13:26:00	8.8375	-59.293
13:36:00	8.84444	-12.539
13:46:00	8.85139	96.887
13:56:00	8.85833	102.312
14:06:00	8.86528	193.937
14:16:00	8.87222	267.828
14:26:00	8.87917	372.083
14:36:00	8.88611	415.599
14:46:00	8.89306	426.62
14:56:00	8.9	469.505
15:06:00	8.90694	480.674
15:16:00	8.91389	575.804
15:26:00	8.92083	604.022
15:36:00	8.92778	689.344
15:46:00	8.93472	728.982
15:56:00	8.94167	802.674
16:06:00	8.94861	801.002
16:16:00	8.95556	769.39
16:26:00	8.9625	738.649
16:36:00	8.96944	891.956
16:46:00	8.97639	860.511
16:56:00	8.98333	828.47
17:06:00	8.99028	883.016
17:16:00	8.99722	891.606
17:26:00	9.00417	850.794
17:36:00	9.01111	784.241
17:46:00	9.01806	789.762
17:56:00	9.025	838.685
18:06:00	9.03194	785.508

## Sheet: cpc-3ko-normalized data
LumiCycle:cpc-3 (Baseline subtracted)
Time (hr:min)	Time (days)	counts/sec
17:22:00	0.99444	817.658
17:32:00	1.00139	780.382
17:42:00	1.00833	703.464
17:52:00	1.01528	630.075
18:02:00	1.02222	562.585
18:12:00	1.02917	472.494
18:22:00	1.03611	423.609
18:32:00	1.04306	385.005
18:42:00	1.05	322.284
18:52:00	1.05694	252.082
19:02:00	1.06389	211.934
19:12:00	1.07083	175.129
19:22:00	1.07778	110.055
19:32:00	1.08472	50.276
19:42:00	1.09167	-2.855
19:52:00	1.09861	-31.078
20:02:00	1.10556	-56.057
20:12:00	1.1125	-114.009
20:22:00	1.11944	-155.027
20:32:00	1.12639	-190.963
20:42:00	1.13333	-254.344
20:52:00	1.14028	-286.137
21:02:00	1.14722	-308.074
21:12:00	1.15417	-316.098
21:22:00	1.16111	-370.452
21:32:00	1.16806	-394.118
21:42:00	1.175	-410.053
21:52:00	1.18194	-451.705
22:02:00	1.18889	-478.707
22:12:00	1.19583	-490.712
22:22:00	1.20278	-510.515
22:32:00	1.20972	-549.177
22:42:00	1.21667	-572.081
22:52:00	1.22361	-584.005
23:02:00	1.23056	-586.186
23:12:00	1.2375	-614.102
23:22:00	1.24444	-641.542
23:32:00	1.25139	-643.33
23:42:00	1.25833	-679.304
23:52:00	1.26528	-647.996
00:02:00	1.27222	-692.127
00:12:00	1.27917	-693.487
00:22:00	1.28611	-677.502
00:32:00	1.29306	-703.623
00:42:00	1.3	-700.938
00:52:00	1.30694	-710.235
01:02:00	1.31389	-735.404
01:12:00	1.32083	-739.696
01:22:00	1.32778	-717.401
01:32:00	1.33472	-723.791
01:42:00	1.34167	-710.269
01:52:00	1.34861	-736.563
02:02:00	1.35556	-721.109
02:12:00	1.3625	-726.903
02:22:00	1.36944	-722.978
02:32:00	1.37639	-716.456
02:42:00	1.38333	-699.256
02:52:00	1.39028	-677.868
03:02:00	1.39722	-665.081
03:12:00	1.40417	-664.708
03:22:00	1.41111	-644.279
03:32:00	1.41806	-643.739
03:42:00	1.425	-634.355
03:52:00	1.43194	-608.422
04:02:00	1.43889	-579.484
04:12:00	1.44583	-586.202
04:22:00	1.45278	-542.375
04:32:00	1.45972	-541.579
04:42:00	1.46667	-518.886
04:52:00	1.47361	-488.166
05:02:00	1.48056	-464.153
05:12:00	1.4875	-444.18
05:22:00	1.49444	-424.739
05:32:00	1.50139	-390.266
05:42:00	1.50833	-362.049
05:52:00	1.51528	-334.056
06:02:00	1.52222	-316.095
06:12:00	1.52917	-283.835
06:22:00	1.53611	-261.555
06:32:00	1.54306	-256.365
06:42:00	1.55	-223.737
06:52:00	1.55694	-208.11
07:02:00	1.56389	-173.793
07:12:00	1.57083	-170.114
07:22:00	1.57778	-140.649
07:32:00	1.58472	-121.368
07:42:00	1.59167	-97.032
07:52:00	1.59861	-74.601
08:02:00	1.60556	-60.9
08:12:00	1.6125	-35.924
08:22:00	1.61944	-32.777
08:32:00	1.62639	-1.598
08:42:00	1.63333	4.293
08:52:00	1.64028	28.438
09:02:00	1.64722	40.773
09:12:00	1.65417	49.155
09:22:00	1.66111	77.568
09:32:00	1.66806	80.839
09:42:00	1.675	109.01
09:52:00	1.68194	102.401
10:02:00	1.68889	102.029
10:12:00	1.69583	120.208
10:22:00	1.70278	114.253
10:32:00	1.70972	113.04
10:42:00	1.71667	114.362
10:52:00	1.72361	126.53
11:02:00	1.73056	119.552
11:12:00	1.7375	128.691
11:22:00	1.74444	114.355
11:32:00	1.75139	109.167
11:42:00	1.75833	120.076
11:52:00	1.76528	111.893
12:02:00	1.77222	113.17
12:12:00	1.77917	111.519
12:22:00	1.78611	105.668
12:32:00	1.79306	92.746
12:42:00	1.8	83.907
12:52:00	1.80694	76.776
13:02:00	1.81389	64.5
13:12:00	1.82083	62.636
13:22:00	1.82778	67.155
13:32:00	1.83472	37.717
13:42:00	1.84167	46.172
13:52:00	1.84861	30.099
14:02:00	1.85556	27.423
14:12:00	1.8625	22.9
14:22:00	1.86944	-13.519
14:32:00	1.87639	-19.346
14:42:00	1.88333	-24.277
14:52:00	1.89028	-39.494
15:02:00	1.89722	-48.087
15:12:00	1.90417	-53.532
15:22:00	1.91111	-71.516
15:32:00	1.91806	-61.23
15:42:00	1.925	-78.646
15:52:00	1.93194	-88.714
16:02:00	1.93889	-96.886
16:12:00	1.94583	-102.237
16:22:00	1.95278	-113.619
16:32:00	1.95972	-123.619
16:42:00	1.96667	-149.455
16:52:00	1.97361	-136.272
17:02:00	1.98056	-154.692
17:12:00	1.9875	-155.091
17:22:00	1.99444	-171.046
17:32:00	2.00139	-193.161
17:42:00	2.00833	-184.86
17:52:00	2.01528	-184.348
18:02:00	2.02222	-197.67
18:12:00	2.02917	-191.243
18:22:00	2.03611	-211.99
18:32:00	2.04306	-211.28
18:42:00	2.05	-227.327
18:52:00	2.05694	-238.794
19:02:00	2.06389	-240.978
19:12:00	2.07083	-243.769
19:22:00	2.07778	-253.5
19:32:00	2.08472	-253.57
19:42:00	2.09167	-254.092
19:52:00	2.09861	-268.499
20:02:00	2.10556	-277.507
20:12:00	2.1125	-270.457
20:22:00	2.11944	-283.899
20:32:00	2.12639	-284.304
20:42:00	2.13333	-281.167
20:52:00	2.14028	-287.366
21:02:00	2.14722	-288.029
21:12:00	2.15417	-283.326
21:22:00	2.16111	-289.2
21:32:00	2.16806	-277.342
21:42:00	2.175	-284.991
21:52:00	2.18194	-287.638
22:02:00	2.18889	-282.296
22:12:00	2.19583	-279.865
22:22:00	2.20278	-276.091
22:32:00	2.20972	-256.466
22:42:00	2.21667	-250.889
22:52:00	2.22361	-264.375
23:02:00	2.23056	-251.139
23:12:00	2.2375	-256.121
23:22:00	2.24444	-224.165
23:32:00	2.25139	-213.879
23:42:00	2.25833	-204.214
23:52:00	2.26528	-212.617
00:02:00	2.27222	-188.581
00:12:00	2.27917	-178.732
00:22:00	2.28611	-152.851
00:32:00	2.29306	-176.104
00:42:00	2.3	-152.597
00:52:00	2.30694	-120.38
01:02:00	2.31389	-107.45
01:12:00	2.32083	-86.551
01:22:00	2.32778	-74.843
01:32:00	2.33472	-40.024
01:42:00	2.34167	-37.766
01:52:00	2.34861	-0.243
02:02:00	2.35556	-11.852
02:12:00	2.3625	19.315
02:22:00	2.36944	52.3
02:32:00	2.37639	65.608
02:42:00	2.38333	106.694
02:52:00	2.39028	104.395
03:02:00	2.39722	130.824
03:12:00	2.40417	139.572
03:22:00	2.41111	172.178
03:32:00	2.41806	176.568
03:42:00	2.425	212.335
03:52:00	2.43194	232.85
04:02:00	2.43889	268.423
04:12:00	2.44583	267.942
04:22:00	2.45278	304.29
04:32:00	2.45972	298.312
04:42:00	2.46667	333.199
04:52:00	2.47361	325.194
05:02:00	2.48056	341.112
05:12:00	2.4875	373.94
05:22:00	2.49444	401.628
05:32:00	2.50139	405.209
05:42:00	2.50833	424.725
05:52:00	2.51528	449.127
06:02:00	2.52222	452.447
06:12:00	2.52917	462.715
06:22:00	2.53611	461.941
06:32:00	2.54306	482.834
06:42:00	2.55	481.019
06:52:00	2.55694	472.148
07:02:00	2.56389	481.97
07:12:00	2.57083	496.548
07:22:00	2.57778	488.897
07:32:00	2.58472	496.088
07:42:00	2.59167	486.291
07:52:00	2.59861	506.182
08:02:00	2.60556	484.839
08:12:00	2.6125	475.642
08:22:00	2.61944	470.06
08:32:00	2.62639	462.829
08:42:00	2.63333	456.188
08:52:00	2.64028	430.451
09:02:00	2.64722	413.08
09:12:00	2.65417	411.386
09:22:00	2.66111	397.829
09:32:00	2.66806	373.618
09:42:00	2.675	355.997
09:52:00	2.68194	364.138
10:02:00	2.68889	331.203
10:12:00	2.69583	288.603
10:22:00	2.70278	295.319
10:32:00	2.70972	250.475
10:42:00	2.71667	246.758
10:52:00	2.72361	230.483
11:02:00	2.73056	181.497
11:12:00	2.7375	176.72
11:22:00	2.74444	140.198
11:32:00	2.75139	106.83
11:42:00	2.75833	118.412
11:52:00	2.76528	73.005
12:02:00	2.77222	46.641
12:12:00	2.77917	11.215
12:22:00	2.78611	-17.987
12:32:00	2.79306	-32.815
12:42:00	2.8	-55.776
12:52:00	2.80694	-93.466
13:02:00	2.81389	-117.964
13:12:00	2.82083	-124.627
13:22:00	2.82778	-170.499
13:32:00	2.83472	-210.058
13:42:00	2.84167	-232.198
13:52:00	2.84861	-264.771
14:02:00	2.85556	-260.839
14:12:00	2.8625	-307.126
14:22:00	2.86944	-313.988
14:32:00	2.87639	-345.466
14:42:00	2.88333	-372.819
14:52:00	2.89028	-406.758
15:02:00	2.89722	-427.155
15:12:00	2.90417	-454.622
15:22:00	2.91111	-487.982
15:32:00	2.91806	-500.112
15:42:00	2.925	-500.348
15:52:00	2.93194	-524.109
16:02:00	2.93889	-570.426
16:12:00	2.94583	-583.983
16:22:00	2.95278	-602.052
16:32:00	2.95972	-627.317
16:42:00	2.96667	-642.411
16:52:00	2.97361	-659.423
17:02:00	2.98056	-656.619
17:12:00	2.9875	-680.87
17:22:00	2.99444	-688.48
17:32:00	3.00139	-714.312
17:42:00	3.00833	-716.694
17:52:00	3.01528	-717.647
18:02:00	3.02222	-740.908
18:12:00	3.02917	-746.961
18:22:00	3.03611	-747.481
18:32:00	3.04306	-738.166
18:42:00	3.05	-760.63
18:52:00	3.05694	-754.349
19:02:00	3.06389	-752.037
19:12:00	3.07083	-756.396
19:22:00	3.07778	-751.216
19:32:00	3.08472	-786.625
19:42:00	3.09167	-747.915
19:52:00	3.09861	-755.2
20:02:00	3.10556	-731.549
20:12:00	3.1125	-697.716
20:22:00	3.11944	-725.194
20:32:00	3.12639	-698.694
20:42:00	3.13333	-679.93
20:52:00	3.14028	-682.52
21:02:00	3.14722	-643.232
21:12:00	3.15417	-611.388
21:22:00	3.16111	-624.933
21:32:00	3.16806	-581.116
21:42:00	3.175	-553.696
21:52:00	3.18194	-537.359
22:02:00	3.18889	-503.087
22:12:00	3.19583	-479.169
22:22:00	3.20278	-434.519
22:32:00	3.20972	-405.346
22:42:00	3.21667	-373.333
22:52:00	3.22361	-330.644
23:02:00	3.23056	-318.173
23:12:00	3.2375	-275.776
23:22:00	3.24444	-223.778
23:32:00	3.25139	-217.835
23:42:00	3.25833	-173.041
23:52:00	3.26528	-104.159
00:02:00	3.27222	-36.139
00:12:00	3.27917	-13.814
00:22:00	3.28611	55.914
00:32:00	3.29306	104.145
00:42:00	3.3	145.797
00:52:00	3.30694	191.541
01:02:00	3.31389	222.143
01:12:00	3.32083	270.39
01:22:00	3.32778	307.034
01:32:00	3.33472	355.569
01:42:00	3.34167	403.719
01:52:00	3.34861	458.754
02:02:00	3.35556	530.799
02:12:00	3.3625	529.647
02:22:00	3.36944	548.782
02:32:00	3.37639	567.095
02:42:00	3.38333	560.746
02:52:00	3.39028	629.384
03:02:00	3.39722	708.455
03:12:00	3.40417	737.694
03:22:00	3.41111	772.924
03:32:00	3.41806	792.077
03:42:00	3.425	848.481
03:52:00	3.43194	836.646
04:02:00	3.43889	868.17
04:12:00	3.44583	884.946
04:22:00	3.45278	904.87
04:32:00	3.45972	912.987
04:42:00	3.46667	955.789
04:52:00	3.47361	924.6
05:02:00	3.48056	931.717
05:12:00	3.4875	951.634
05:22:00	3.49444	927.011
05:32:00	3.50139	871.816
05:42:00	3.50833	952.064
05:52:00	3.51528	893.653
06:02:00	3.52222	874.29
06:12:00	3.52917	815.399
06:22:00	3.53611	818.407
06:32:00	3.54306	823.542
06:42:00	3.55	765.702
06:52:00	3.55694	719.724
07:02:00	3.56389	753.911
07:12:00	3.57083	724.161
07:22:00	3.57778	638.396
07:32:00	3.58472	608.562
07:42:00	3.59167	578.931
07:52:00	3.59861	537.967
08:02:00	3.60556	496.279
08:12:00	3.6125	426.179
08:22:00	3.61944	433.504
08:32:00	3.62639	414.754
08:42:00	3.63333	379.679
08:52:00	3.64028	363.937
09:02:00	3.64722	262.653
09:12:00	3.65417	220
09:22:00	3.66111	196.751
09:32:00	3.66806	145.291
09:42:00	3.675	75.363
09:52:00	3.68194	-38.885
10:02:00	3.68889	-46.788
10:12:00	3.69583	-122.635
10:22:00	3.70278	-147.86
10:32:00	3.70972	-155.716
10:42:00	3.71667	-215.017
10:52:00	3.72361	-270.811
11:02:00	3.73056	-350.817
11:12:00	3.7375	-389.883
11:22:00	3.74444	-454.751
11:32:00	3.75139	-525.208
11:42:00	3.75833	-570.731
11:52:00	3.76528	-586.076
12:02:00	3.77222	-667.01
12:12:00	3.77917	-655.531
12:22:00	3.78611	-716.797
12:32:00	3.79306	-762.233
12:42:00	3.8	-804.993
12:52:00	3.80694	-842.451
13:02:00	3.81389	-895.95
13:12:00	3.82083	-914.73
13:22:00	3.82778	-977.683
13:32:00	3.83472	-968.36
13:42:00	3.84167	-986.863
13:52:00	3.84861	-1047.48
14:02:00	3.85556	-1036.17
14:12:00	3.8625	-1052.36
14:22:00	3.86944	-1070.57
14:32:00	3.87639	-1097.19
14:42:00	3.88333	-1103.52
14:52:00	3.89028	-1134
15:02:00	3.89722	-1164.83
15:12:00	3.90417	-1089.69
15:22:00	3.91111	-1113.76
15:32:00	3.91806	-1145.3
15:42:00	3.925	-1163.41
15:52:00	3.93194	-1130.32
16:02:00	3.93889	-1123.18
16:12:00	3.94583	-1084.6
16:22:00	3.95278	-1098.33
16:32:00	3.95972	-1089.12
16:42:00	3.96667	-1072.15
16:52:00	3.97361	-1070.4
17:02:00	3.98056	-1047.04
17:12:00	3.9875	-1041.34
17:22:00	3.99444	-1040.75
17:32:00	4.00139	-1019.75
17:42:00	4.00833	-922.623
17:52:00	4.01528	-912.297
18:02:00	4.02222	-861.975
18:12:00	4.02917	-788.694
18:22:00	4.03611	-771.037
18:32:00	4.04306	-680.302
18:42:00	4.05	-537.118
18:52:00	4.05694	-541.894
19:02:00	4.06389	-503.643
19:12:00	4.07083	-412.816
19:22:00	4.07778	-318.379
19:32:00	4.08472	-316.31
19:42:00	4.09167	-249.172
19:52:00	4.09861	-154.666
20:02:00	4.10556	-114.352
20:12:00	4.1125	14.547
20:22:00	4.11944	5.911
20:32:00	4.12639	113.026
20:42:00	4.13333	179.284
20:52:00	4.14028	263.062
21:02:00	4.14722	329.686
21:12:00	4.15417	400.247
21:22:00	4.16111	438.009
21:32:00	4.16806	641.928
21:42:00	4.175	690.145
21:52:00	4.18194	740.457
22:02:00	4.18889	883.725
22:12:00	4.19583	984.873
22:22:00	4.20278	989.927
22:32:00	4.20972	1097.07
22:42:00	4.21667	1171.37
22:52:00	4.22361	1272.55
23:02:00	4.23056	1205.91
23:12:00	4.2375	1323.03
23:22:00	4.24444	1433.94
23:32:00	4.25139	1439.27
23:42:00	4.25833	1464.36
23:52:00	4.26528	1635.39
00:02:00	4.27222	1672.86
00:12:00	4.27917	1720.52
00:22:00	4.28611	1697.89
00:32:00	4.29306	1738.62
00:42:00	4.3	1843.85
00:52:00	4.30694	1815.03
01:02:00	4.31389	1757
01:12:00	4.32083	1770.28
01:22:00	4.32778	1777.57
01:32:00	4.33472	1755.42
01:42:00	4.34167	1681.15
01:52:00	4.34861	1753.79
02:02:00	4.35556	1668.31
02:12:00	4.3625	1698.8
02:22:00	4.36944	1691.93
02:32:00	4.37639	1625.83
02:42:00	4.38333	1693.92
02:52:00	4.39028	1624.93
03:02:00	4.39722	1564.62
03:12:00	4.40417	1471.53
03:22:00	4.41111	1430.9
03:32:00	4.41806	1407.38
03:42:00	4.425	1309.04
03:52:00	4.43194	1249.49
04:02:00	4.43889	1190.02
04:12:00	4.44583	1097.1
04:22:00	4.45278	1037.14
04:32:00	4.45972	976.038
04:42:00	4.46667	901.668
04:52:00	4.47361	867.378
05:02:00	4.48056	833.899
05:12:00	4.4875	759.208
05:22:00	4.49444	672.265
05:32:00	4.50139	591.398
05:42:00	4.50833	490.524
05:52:00	4.51528	399.41
06:02:00	4.52222	245.26
06:12:00	4.52917	214.66
06:22:00	4.53611	136.798
06:32:00	4.54306	47.866
06:42:00	4.55	-59.781
06:52:00	4.55694	-82.811
07:02:00	4.56389	-174.128
07:12:00	4.57083	-227.568
07:22:00	4.57778	-232.753
07:32:00	4.58472	-358.664
07:42:00	4.59167	-437.413
07:52:00	4.59861	-458.797
08:02:00	4.60556	-474.62
08:12:00	4.6125	-579.056
08:22:00	4.61944	-643.82
08:32:00	4.62639	-736.88
08:42:00	4.63333	-786.416
08:52:00	4.64028	-871.987
09:02:00	4.64722	-931.948
09:12:00	4.65417	-934.759
09:22:00	4.66111	-1019.87
09:32:00	4.66806	-994.795
09:42:00	4.675	-1049.76
09:52:00	4.68194	-1103.52
10:02:00	4.68889	-1167.13
10:12:00	4.69583	-1163.02
10:22:00	4.70278	-1184.79
10:32:00	4.70972	-1275.12
10:42:00	4.71667	-1244.16
10:52:00	4.72361	-1329.64
11:02:00	4.73056	-1342.95
11:12:00	4.7375	-1389.42
11:22:00	4.74444	-1428.72
11:32:00	4.75139	-1407.2
11:42:00	4.75833	-1411.75
11:52:00	4.76528	-1376.73
12:02:00	4.77222	-1424.17
12:12:00	4.77917	-1408.68
12:22:00	4.78611	-1375.98
12:32:00	4.79306	-1395.03
12:42:00	4.8	-1331.53
12:52:00	4.80694	-1323.95
13:02:00	4.81389	-1330.94
13:12:00	4.82083	-1329.41
13:22:00	4.82778	-1339.3
13:32:00	4.83472	-1281.37
13:42:00	4.84167	-1248.75
13:52:00	4.84861	-1199.13
14:02:00	4.85556	-1221.58
14:12:00	4.8625	-1122.82
14:22:00	4.86944	-1106.25
14:32:00	4.87639	-1037.61
14:42:00	4.88333	-1012.24
14:52:00	4.89028	-965.246
15:02:00	4.89722	-876.052
15:12:00	4.90417	-842.828
15:22:00	4.91111	-799.02
15:32:00	4.91806	-695.724
15:42:00	4.925	-669.353
15:52:00	4.93194	-641.28
16:02:00	4.93889	-510.552
16:12:00	4.94583	-459.011
16:22:00	4.95278	-398.288
16:32:00	4.95972	-320.252
16:42:00	4.96667	-283.773
16:52:00	4.97361	-254.811
17:02:00	4.98056	-75.933
17:12:00	4.9875	-42.458
17:22:00	4.99444	12.926
17:32:00	5.00139	116.098
17:42:00	5.00833	212.613
17:52:00	5.01528	366.551
18:02:00	5.02222	410.022
18:12:00	5.02917	503.159
18:22:00	5.03611	608.734
18:32:00	5.04306	628.298
18:42:00	5.05	745.26
18:52:00	5.05694	879.806
19:02:00	5.06389	923.213
19:12:00	5.07083	950.413
19:22:00	5.07778	1050.67
19:32:00	5.08472	1087.29
19:42:00	5.09167	1111.52
19:52:00	5.09861	1153.05
20:02:00	5.10556	1253.19
20:12:00	5.1125	1373.99
20:22:00	5.11944	1393.09
20:32:00	5.12639	1490.53
20:42:00	5.13333	1540.6
20:52:00	5.14028	1511.34
21:02:00	5.14722	1526.79
21:12:00	5.15417	1641.77
21:22:00	5.16111	1598.25
21:32:00	5.16806	1665.74
21:42:00	5.175	1675.93
21:52:00	5.18194	1752.89
22:02:00	5.18889	1764.25
22:12:00	5.19583	1686.63
22:22:00	5.20278	1694.17
22:32:00	5.20972	1688.51
22:42:00	5.21667	1670.15
22:52:00	5.22361	1692.17
23:02:00	5.23056	1647.85
23:12:00	5.2375	1645.85
23:22:00	5.24444	1661.48
23:32:00	5.25139	1652.82
23:42:00	5.25833	1538.1
23:52:00	5.26528	1493.85
00:02:00	5.27222	1440
00:12:00	5.27917	1444.95
00:22:00	5.28611	1434.66
00:32:00	5.29306	1259.99
00:42:00	5.3	1289.65
00:52:00	5.30694	1256.95
01:02:00	5.31389	1163.41
01:12:00	5.32083	1108.17
01:22:00	5.32778	1044.03
01:32:00	5.33472	969.582
01:42:00	5.34167	890.016
01:52:00	5.34861	855.02
02:02:00	5.35556	746.389
02:12:00	5.3625	636.507
02:22:00	5.36944	607.589
02:32:00	5.37639	535.45
02:42:00	5.38333	409.28
02:52:00	5.39028	340.761
03:02:00	5.39722	293.701
03:12:00	5.40417	207.165
03:22:00	5.41111	83.618
03:32:00	5.41806	92.81
03:42:00	5.425	11.322
03:52:00	5.43194	-85.617
04:02:00	5.43889	-30.563
04:12:00	5.44583	-196.396
04:22:00	5.45278	-230.802
04:32:00	5.45972	-330.016
04:42:00	5.46667	-403.474
04:52:00	5.47361	-541.892
05:02:00	5.48056	-611.914
05:12:00	5.4875	-630.412
05:22:00	5.49444	-665.542
05:32:00	5.50139	-724.853
05:42:00	5.50833	-812.22
05:52:00	5.51528	-791.248
06:02:00	5.52222	-862.358
06:12:00	5.52917	-901.41
06:22:00	5.53611	-955.802
06:32:00	5.54306	-1006.02
06:42:00	5.55	-1095.73
06:52:00	5.55694	-1054.3
07:02:00	5.56389	-1138.26
07:12:00	5.57083	-1161.51
07:22:00	5.57778	-1194.24
07:32:00	5.58472	-1254.11
07:42:00	5.59167	-1289.83
07:52:00	5.59861	-1363.9
08:02:00	5.60556	-1402.16
08:12:00	5.6125	-1364.03
08:22:00	5.61944	-1426.26
08:32:00	5.62639	-1394.07
08:42:00	5.63333	-1453.82
08:52:00	5.64028	-1413.43
09:02:00	5.64722	-1470.81
09:12:00	5.65417	-1468.53
09:22:00	5.66111	-1430.39
09:32:00	5.66806	-1456.24
09:42:00	5.675	-1403.88
09:52:00	5.68194	-1390.91
10:02:00	5.68889	-1382.18
10:12:00	5.69583	-1384.3
10:22:00	5.70278	-1391.18
10:32:00	5.70972	-1364.41
10:42:00	5.71667	-1315.49
10:52:00	5.72361	-1304.64
11:02:00	5.73056	-1313.9
11:12:00	5.7375	-1289.59
11:22:00	5.74444	-1203.77
11:32:00	5.75139	-1241.57
11:42:00	5.75833	-1212.79
11:52:00	5.76528	-1112.78
12:02:00	5.77222	-1027.1
12:12:00	5.77917	-1013.3
12:22:00	5.78611	-981.814
12:32:00	5.79306	-970.264
12:42:00	5.8	-834.321
12:52:00	5.80694	-719.071
13:02:00	5.81389	-788.032
13:12:00	5.82083	-721.117
13:22:00	5.82778	-601.783
13:32:00	5.83472	-519.929
13:42:00	5.84167	-489.79
13:52:00	5.84861	-408.997
14:02:00	5.85556	-418.277
14:12:00	5.8625	-278.766
14:22:00	5.86944	-229.63
14:32:00	5.87639	-212.874
14:42:00	5.88333	-32.107
14:52:00	5.89028	-46.054
15:02:00	5.89722	-13.665
15:12:00	5.90417	36.812
15:22:00	5.91111	159.619
15:32:00	5.91806	296.83
15:42:00	5.925	362.097
15:52:00	5.93194	380.519
16:02:00	5.93889	448.789
16:12:00	5.94583	592.672
16:22:00	5.95278	616.291
16:32:00	5.95972	636.461
16:42:00	5.96667	761.959
16:52:00	5.97361	878.483
17:02:00	5.98056	924.726
17:12:00	5.9875	997.263
17:22:00	5.99444	1051.14
17:32:00	6.00139	1116.35
17:42:00	6.00833	1171.67
17:52:00	6.01528	1148.06
18:02:00	6.02222	1168.2
18:12:00	6.02917	1172.85
18:22:00	6.03611	1256.84
18:32:00	6.04306	1250.25
18:42:00	6.05	1350.66
18:52:00	6.05694	1269.07
19:02:00	6.06389	1451.82
19:12:00	6.07083	1454.34
19:22:00	6.07778	1473.22
19:32:00	6.08472	1424.18
19:42:00	6.09167	1441.31
19:52:00	6.09861	1509.87
20:02:00	6.10556	1468.64
20:12:00	6.1125	1479.2
20:22:00	6.11944	1452.72
20:32:00	6.12639	1415.72
20:42:00	6.13333	1450.52
20:52:00	6.14028	1468.91
21:02:00	6.14722	1381.7
21:12:00	6.15417	1387
21:22:00	6.16111	1376.11
21:32:00	6.16806	1260.79
21:42:00	6.175	1286.44
21:52:00	6.18194	1232.68
22:02:00	6.18889	1197.48
22:12:00	6.19583	1169.89
22:22:00	6.20278	1130.76
22:32:00	6.20972	1063.66
22:42:00	6.21667	1014.2
22:52:00	6.22361	990.372
23:02:00	6.23056	906.382
23:12:00	6.2375	795.673
23:22:00	6.24444	809.46
23:32:00	6.25139	753.606
23:42:00	6.25833	692.563
23:52:00	6.26528	582.029
00:02:00	6.27222	549.812
00:12:00	6.27917	436.336
00:22:00	6.28611	400.608
00:32:00	6.29306	329.049
00:42:00	6.3	246.173
00:52:00	6.30694	210.079
01:02:00	6.31389	81.333
01:12:00	6.32083	80.933
01:22:00	6.32778	15.615
01:32:00	6.33472	-11.461
01:42:00	6.34167	-103.279
01:52:00	6.34861	-138.561
02:02:00	6.35556	-229.105
02:12:00	6.3625	-234.301
02:22:00	6.36944	-336.68
02:32:00	6.37639	-414.903
02:42:00	6.38333	-471.254
02:52:00	6.39028	-501.659
03:02:00	6.39722	-590.85
03:12:00	6.40417	-629.908
03:22:00	6.41111	-710.637
03:32:00	6.41806	-757.801
03:42:00	6.425	-806.744
03:52:00	6.43194	-863.173
04:02:00	6.43889	-841.49
04:12:00	6.44583	-864.697
04:22:00	6.45278	-1007.68
04:32:00	6.45972	-979.094
04:42:00	6.46667	-963.165
04:52:00	6.47361	-1030.72
05:02:00	6.48056	-1080.32
05:12:00	6.4875	-1095.83
05:22:00	6.49444	-1118.64
05:32:00	6.50139	-1167.56
05:42:00	6.50833	-1263.31
05:52:00	6.51528	-1173.89
06:02:00	6.52222	-1226.36
06:12:00	6.52917	-1245.7
06:22:00	6.53611	-1334.28
06:32:00	6.54306	-1304.87
06:42:00	6.55	-1300.87
06:52:00	6.55694	-1333.48
07:02:00	6.56389	-1290.7
07:12:00	6.57083	-1290.16
07:22:00	6.57778	-1372.54
07:32:00	6.58472	-1283.78
07:42:00	6.59167	-1298.54
07:52:00	6.59861	-1306.69
08:02:00	6.60556	-1337.52
08:12:00	6.6125	-1297.03
08:22:00	6.61944	-1275.17
08:32:00	6.62639	-1239.12
08:42:00	6.63333	-1219.69
08:52:00	6.64028	-1185.67
09:02:00	6.64722	-1163.87
09:12:00	6.65417	-1111.07
09:22:00	6.66111	-1095.55
09:32:00	6.66806	-1044.1
09:42:00	6.675	-1021.55
09:52:00	6.68194	-973.022
10:02:00	6.68889	-890.248
10:12:00	6.69583	-868.133
10:22:00	6.70278	-861.663
10:32:00	6.70972	-806.794
10:42:00	6.71667	-719.89
10:52:00	6.72361	-653.438
11:02:00	6.73056	-618.273
11:12:00	6.7375	-491.793
11:22:00	6.74444	-426.799
11:32:00	6.75139	-430.97
11:42:00	6.75833	-335.79
11:52:00	6.76528	-249.477
12:02:00	6.77222	-239.486
12:12:00	6.77917	-173.769
12:22:00	6.78611	-121.208
12:32:00	6.79306	-3.246
12:42:00	6.8	47.492
12:52:00	6.80694	119.09
13:02:00	6.81389	195.372
13:12:00	6.82083	273.74
13:22:00	6.82778	284.908
13:32:00	6.83472	400.473
13:42:00	6.84167	428.52
13:52:00	6.84861	548.565
14:02:00	6.85556	588.132
14:12:00	6.8625	610.737
14:22:00	6.86944	680.75
14:32:00	6.87639	782.455
14:42:00	6.88333	861.266
14:52:00	6.89028	944.029
15:02:00	6.89722	967.121
15:12:00	6.90417	993.753
15:22:00	6.91111	1067.19
15:32:00	6.91806	1134.24
15:42:00	6.925	1086.17
15:52:00	6.93194	1162.47
16:02:00	6.93889	1150.12
16:12:00	6.94583	1306.71
16:22:00	6.95278	1306.65
16:32:00	6.95972	1350.66
16:42:00	6.96667	1326.28
16:52:00	6.97361	1370.69
17:02:00	6.98056	1359.54
17:12:00	6.9875	1376.12
17:22:00	6.99444	1414.8
17:32:00	7.00139	1414.15
17:42:00	7.00833	1389.04
17:52:00	7.01528	1467.9
18:02:00	7.02222	1442.7
18:12:00	7.02917	1398.26
18:22:00	7.03611	1380.55
18:32:00	7.04306	1373.2
18:42:00	7.05	1357
18:52:00	7.05694	1284.29
19:02:00	7.06389	1310.62
19:12:00	7.07083	1276.99
19:22:00	7.07778	1249.38
19:32:00	7.08472	1176.21
19:42:00	7.09167	1173
19:52:00	7.09861	1099.17
20:02:00	7.10556	1150.49
20:12:00	7.1125	1051.17
20:22:00	7.11944	957.829
20:32:00	7.12639	977.514
20:42:00	7.13333	897.608
20:52:00	7.14028	811.765
21:02:00	7.14722	791.715
21:12:00	7.15417	687.936
21:22:00	7.16111	647.272
21:32:00	7.16806	650.853
21:42:00	7.175	533.278
21:52:00	7.18194	486.555
22:02:00	7.18889	422.825
22:12:00	7.19583	407.32
22:22:00	7.20278	332.57
22:32:00	7.20972	238.3
22:42:00	7.21667	198.447
22:52:00	7.22361	171.915
23:02:00	7.23056	70.451
23:12:00	7.2375	18.852
23:22:00	7.24444	-52.128
23:32:00	7.25139	-93.313
23:42:00	7.25833	-179.691
23:52:00	7.26528	-172.739
00:02:00	7.27222	-228.136
00:12:00	7.27917	-314.119
00:22:00	7.28611	-336.062
00:32:00	7.29306	-410.427
00:42:00	7.3	-421.747
00:52:00	7.30694	-495.844
01:02:00	7.31389	-547.31
01:12:00	7.32083	-609.999
01:22:00	7.32778	-621.877
01:32:00	7.33472	-657.908
01:42:00	7.34167	-717.652
01:52:00	7.34861	-749.855
02:02:00	7.35556	-808.989
02:12:00	7.3625	-837.452
02:22:00	7.36944	-823.228
02:32:00	7.37639	-844.17
02:42:00	7.38333	-877.37
02:52:00	7.39028	-884.947
03:02:00	7.39722	-963.41
03:12:00	7.40417	-975.551
03:22:00	7.41111	-975.846
03:32:00	7.41806	-1037.77
03:42:00	7.425	-1030.88
03:52:00	7.43194	-1018.87
04:02:00	7.43889	-1040.56
04:12:00	7.44583	-1043.9
04:22:00	7.45278	-1041.17
04:32:00	7.45972	-1024.68
04:42:00	7.46667	-1034.62
04:52:00	7.47361	-1026.63
05:02:00	7.48056	-1078.08
05:12:00	7.4875	-1081.05
05:22:00	7.49444	-1032.38
05:32:00	7.50139	-1032.12
05:42:00	7.50833	-1000.32
05:52:00	7.51528	-1012.21
06:02:00	7.52222	-1000.72
06:12:00	7.52917	-1006.4
06:22:00	7.53611	-977.191
06:32:00	7.54306	-954.341
06:42:00	7.55	-933.041
06:52:00	7.55694	-913.375
07:02:00	7.56389	-896.88
07:12:00	7.57083	-818.337
07:22:00	7.57778	-821.6
07:32:00	7.58472	-742.944
07:42:00	7.59167	-743.453
07:52:00	7.59861	-747.789
08:02:00	7.60556	-697.876
08:12:00	7.6125	-656.849
08:22:00	7.61944	-579.921
08:32:00	7.62639	-588.088
08:42:00	7.63333	-560.686
08:52:00	7.64028	-462.048
09:02:00	7.64722	-419.771
09:12:00	7.65417	-353.899
09:22:00	7.66111	-359.08
09:32:00	7.66806	-270.088
09:42:00	7.675	-253.839
09:52:00	7.68194	-129.31
10:02:00	7.68889	-79.752
10:12:00	7.69583	-62.335
10:22:00	7.70278	0.084
10:32:00	7.70972	41.655
10:42:00	7.71667	150.583
10:52:00	7.72361	164.205
11:02:00	7.73056	207.169
11:12:00	7.7375	275.605
11:22:00	7.74444	308.856
11:32:00	7.75139	373.362
11:42:00	7.75833	425.347
11:52:00	7.76528	488.031
12:02:00	7.77222	520.159
12:12:00	7.77917	606.533
12:22:00	7.78611	602.414
12:32:00	7.79306	618.756
12:42:00	7.8	706.613
12:52:00	7.80694	757.21
13:02:00	7.81389	765.057
13:12:00	7.82083	850.848
13:22:00	7.82778	882.542
13:32:00	7.83472	892.796
13:42:00	7.84167	956.148
13:52:00	7.84861	937.499
14:02:00	7.85556	977.037
14:12:00	7.8625	964.721
14:22:00	7.86944	976.231
14:32:00	7.87639	1034.84
14:42:00	7.88333	1036.79
14:52:00	7.89028	1028.44
15:02:00	7.89722	1046.86
15:12:00	7.90417	1074.9
15:22:00	7.91111	1050.04
15:32:00	7.91806	1029.63
15:42:00	7.925	1056.7
15:52:00	7.93194	1050.62
16:02:00	7.93889	1056.68
16:12:00	7.94583	1017.7
16:22:00	7.95278	1030.73
16:32:00	7.95972	1010.74
16:42:00	7.96667	1030.48
16:52:00	7.97361	977.99
17:02:00	7.98056	985.804
17:12:00	7.9875	907.288
17:22:00	7.99444	923.959
17:32:00	8.00139	884.361
17:42:00	8.00833	845.817
17:52:00	8.01528	807.696
18:02:00	8.02222	805.075
18:12:00	8.02917	734.788
18:22:00	8.03611	724.922
18:32:00	8.04306	724.285
18:42:00	8.05	642.467
18:52:00	8.05694	599.833
19:02:00	8.06389	596.484
19:12:00	8.07083	527.908
19:22:00	8.07778	471.977
19:32:00	8.08472	450.199
19:42:00	8.09167	369.18
19:52:00	8.09861	357.414
20:02:00	8.10556	299.383
20:12:00	8.1125	215.612
20:22:00	8.11944	202.212
20:32:00	8.12639	202.688
20:42:00	8.13333	109.805
20:52:00	8.14028	29.055
21:02:00	8.14722	23.04
21:12:00	8.15417	-15.499
21:22:00	8.16111	-49.438
21:32:00	8.16806	-92.726
21:42:00	8.175	-179.042
21:52:00	8.18194	-179.749
22:02:00	8.18889	-259.805
22:12:00	8.19583	-304.243
22:22:00	8.20278	-355.03
22:32:00	8.20972	-434.202
22:42:00	8.21667	-452.544
22:52:00	8.22361	-499.19
23:02:00	8.23056	-517.622
23:12:00	8.2375	-554.595
23:22:00	8.24444	-571.223
23:32:00	8.25139	-631.639
23:42:00	8.25833	-607.525
23:52:00	8.26528	-621.632
00:02:00	8.27222	-666.117
00:12:00	8.27917	-730.939
00:22:00	8.28611	-721.134
00:32:00	8.29306	-698.769
00:42:00	8.3	-706.041
00:52:00	8.30694	-736.2
01:02:00	8.31389	-781.046
01:12:00	8.32083	-795.349
01:22:00	8.32778	-784.223
01:32:00	8.33472	-797.166
01:42:00	8.34167	-798.898
01:52:00	8.34861	-805.819
02:02:00	8.35556	-812.582
02:12:00	8.3625	-783.449
02:22:00	8.36944	-793.729
02:32:00	8.37639	-800.824
02:42:00	8.38333	-765.272
02:52:00	8.39028	-782.334
03:02:00	8.39722	-785.769
03:12:00	8.40417	-756.647
03:22:00	8.41111	-747.373
03:32:00	8.41806	-740.984
03:42:00	8.425	-723.99
03:52:00	8.43194	-724.998
04:02:00	8.43889	-679.632
04:12:00	8.44583	-665.262
04:22:00	8.45278	-653.858
04:32:00	8.45972	-635.238
04:42:00	8.46667	-636.404
04:52:00	8.47361	-649.223
05:02:00	8.48056	-612.081
05:12:00	8.4875	-556.013
05:22:00	8.49444	-565.257
05:32:00	8.50139	-541.377
05:42:00	8.50833	-478.543
05:52:00	8.51528	-457.122
06:02:00	8.52222	-434.117
06:12:00	8.52917	-442.586
06:22:00	8.53611	-388.669
06:32:00	8.54306	-316.31
06:42:00	8.55	-285.819
06:52:00	8.55694	-220.983
07:02:00	8.56389	-246.706
07:12:00	8.57083	-215.622
07:22:00	8.57778	-163.579
07:32:00	8.58472	-158.065
07:42:00	8.59167	-102.422
07:52:00	8.59861	-72.963
08:02:00	8.60556	-49.163
08:12:00	8.6125	4.039
08:22:00	8.61944	49.155
08:32:00	8.62639	98.334
08:42:00	8.63333	146.165
08:52:00	8.64028	183.059
09:02:00	8.64722	220.669
09:12:00	8.65417	233.02
09:22:00	8.66111	264.482
09:32:00	8.66806	305.338
09:42:00	8.675	353.088
09:52:00	8.68194	333.693
10:02:00	8.68889	371.69
10:12:00	8.69583	407.755
10:22:00	8.70278	404.695
10:32:00	8.70972	425.141
10:42:00	8.71667	474.024
10:52:00	8.72361	414.389
11:02:00	8.73056	467.116
11:12:00	8.7375	464.307
11:22:00	8.74444	503.93
11:32:00	8.75139	482.002
11:42:00	8.75833	532.422
11:52:00	8.76528	512.869
12:02:00	8.77222	469.352
12:12:00	8.77917	500.272
12:22:00	8.78611	520.362
12:32:00	8.79306	534.6
12:42:00	8.8	539.737
12:52:00	8.80694	545.591
13:02:00	8.81389	492.706
13:12:00	8.82083	470.891
13:22:00	8.82778	501.598
13:32:00	8.83472	444.935
13:42:00	8.84167	462.665
13:52:00	8.84861	463.418
14:02:00	8.85556	418.859
14:12:00	8.8625	393.263
14:22:00	8.86944	423.366
14:32:00	8.87639	414.052
14:42:00	8.88333	331.77
14:52:00	8.89028	351.156
15:02:00	8.89722	346.365
15:12:00	8.90417	311.836
15:22:00	8.91111	285.682
15:32:00	8.91806	262.631
15:42:00	8.925	209.712
15:52:00	8.93194	187.244
16:02:00	8.93889	178.958
16:12:00	8.94583	150.205
16:22:00	8.95278	136.911
16:32:00	8.95972	100.449
16:42:00	8.96667	71.649
16:52:00	8.97361	63.882
17:02:00	8.98056	-12.477
17:12:00	8.9875	-38.571
17:22:00	8.99444	-85.252
17:32:00	9.00139	-79.229
17:42:00	9.00833	-122.034
17:52:00	9.01528	-149.381
18:02:00	9.02222	-213.785
18:12:00	9.02917	-252.607
18:22:00	9.03611	-256.361

## Sheet: cpc-1ko-normalized data
LumiCycle: cpc-1 (Baseline subtracted)
Time (hr:min)	Time (days)	counts/sec
17:18:00	0.99167	1066.69
17:28:00	0.99861	992.578
17:38:00	1.00556	915.49
17:48:00	1.0125	834.585
17:58:00	1.01944	707.201
18:08:00	1.02639	620.863
18:18:00	1.03333	531.15
18:28:00	1.04028	360.259
18:38:00	1.04722	301.902
18:48:00	1.05417	167.579
18:58:00	1.06111	85.105
19:08:00	1.06806	-7.171
19:18:00	1.075	-68.931
19:28:00	1.08194	-169.671
19:38:00	1.08889	-246.699
19:48:00	1.09583	-332.723
19:58:00	1.10278	-359.957
20:08:00	1.10972	-410.834
20:18:00	1.11667	-484.536
20:28:00	1.12361	-516.471
20:38:00	1.13056	-580.877
20:48:00	1.1375	-623.518
20:58:00	1.14444	-669.064
21:08:00	1.15139	-697.117
21:18:00	1.15833	-737.973
21:28:00	1.16528	-758.368
21:38:00	1.17222	-788.153
21:48:00	1.17917	-807.439
21:58:00	1.18611	-812.813
22:08:00	1.19306	-873.335
22:18:00	1.2	-862.663
22:28:00	1.20694	-860.79
22:38:00	1.21389	-897.817
22:48:00	1.22083	-887.504
22:58:00	1.22778	-905.556
23:08:00	1.23472	-902.883
23:18:00	1.24167	-883.016
23:28:00	1.24861	-894.98
23:38:00	1.25556	-885.369
23:48:00	1.2625	-909.439
23:58:00	1.26944	-894.145
00:08:00	1.27639	-902.03
00:18:00	1.28333	-876.621
00:28:00	1.29028	-905.388
00:38:00	1.29722	-864.799
00:48:00	1.30417	-857.374
00:58:00	1.31111	-861.921
01:08:00	1.31806	-833.351
01:18:00	1.325	-832.711
01:28:00	1.33194	-815.724
01:38:00	1.33889	-797.911
01:48:00	1.34583	-816.84
01:58:00	1.35278	-797.349
02:08:00	1.35972	-780.074
02:18:00	1.36667	-766.823
02:28:00	1.37361	-744.572
02:38:00	1.38056	-727.558
02:48:00	1.3875	-723.2
02:58:00	1.39444	-687.644
03:08:00	1.40139	-649.343
03:18:00	1.40833	-657.812
03:28:00	1.41528	-602.846
03:38:00	1.42222	-600.202
03:48:00	1.42917	-560.63
03:58:00	1.43611	-532.381
04:08:00	1.44306	-514.425
04:18:00	1.45	-461.463
04:28:00	1.45694	-455.28
04:38:00	1.46389	-413.098
04:48:00	1.47083	-384.952
04:58:00	1.47778	-335.389
05:08:00	1.48472	-303.379
05:18:00	1.49167	-256.568
05:28:00	1.49861	-207.05
05:38:00	1.50556	-186.968
05:48:00	1.5125	-155.589
05:58:00	1.51944	-121.831
06:08:00	1.52639	-79.738
06:18:00	1.53333	-42.048
06:28:00	1.54028	-19.143
06:38:00	1.54722	9.38
06:48:00	1.55417	48.894
06:58:00	1.56111	97.935
07:08:00	1.56806	106.94
07:18:00	1.575	138.366
07:28:00	1.58194	153.2
07:38:00	1.58889	168.82
07:48:00	1.59583	196.965
07:58:00	1.60278	237.554
08:08:00	1.60972	249.09
08:18:00	1.61667	268.979
08:28:00	1.62361	276.652
08:38:00	1.63056	290.884
08:48:00	1.6375	327.51
08:58:00	1.64444	353.935
09:08:00	1.65139	366.967
09:18:00	1.65833	384.334
09:28:00	1.66528	368.928
09:38:00	1.67222	400.831
09:48:00	1.67917	416.076
09:58:00	1.68611	412.422
10:08:00	1.69306	431.927
10:18:00	1.7	415.722
10:28:00	1.70694	450.105
10:38:00	1.71389	433.878
10:48:00	1.72083	449.443
10:58:00	1.72778	444.69
11:08:00	1.73472	437.028
11:18:00	1.74167	438.417
11:28:00	1.74861	430.429
11:38:00	1.75556	453.078
11:48:00	1.7625	433.599
11:58:00	1.76944	432.298
12:08:00	1.77639	415.504
12:18:00	1.78333	421.71
12:28:00	1.79028	412.692
12:38:00	1.79722	396.907
12:48:00	1.80417	415.664
12:58:00	1.81111	392.834
13:08:00	1.81806	375.466
13:18:00	1.825	363.784
13:28:00	1.83194	349.118
13:38:00	1.83889	355.527
13:48:00	1.84583	342.837
13:58:00	1.85278	322.052
14:08:00	1.85972	313.427
14:18:00	1.86667	306.541
14:28:00	1.87361	282.956
14:38:00	1.88056	265.193
14:48:00	1.8875	247.495
14:58:00	1.89444	247.359
15:08:00	1.90139	229.194
15:18:00	1.90833	212.911
15:28:00	1.91528	204.089
15:38:00	1.92222	185.9
15:48:00	1.92917	171.281
15:58:00	1.93611	159.612
16:08:00	1.94306	144.878
16:18:00	1.95	119.889
16:28:00	1.95694	129.841
16:38:00	1.96389	108.392
16:48:00	1.97083	75.172
16:58:00	1.97778	64.914
17:08:00	1.98472	37.237
17:18:00	1.99167	10.447
17:28:00	1.99861	8.868
17:38:00	2.00556	-15.393
17:48:00	2.0125	-20.515
17:58:00	2.01944	-46.457
18:08:00	2.02639	-35.967
18:18:00	2.03333	-57.904
18:28:00	2.04028	-85.234
18:38:00	2.04722	-107.904
18:48:00	2.05417	-115.411
18:58:00	2.06111	-118.579
19:08:00	2.06806	-131.624
19:18:00	2.075	-149.791
19:28:00	2.08194	-185.358
19:38:00	2.08889	-173.947
19:48:00	2.09583	-194.147
19:58:00	2.10278	-199.003
20:08:00	2.10972	-225.965
20:18:00	2.11667	-231.9
20:28:00	2.12361	-251.273
20:38:00	2.13056	-273.488
20:48:00	2.1375	-272.577
20:58:00	2.14444	-286.993
21:08:00	2.15139	-294.279
21:18:00	2.15833	-295.202
21:28:00	2.16528	-320.664
21:38:00	2.17222	-330.622
21:48:00	2.17917	-335.075
21:58:00	2.18611	-331.174
22:08:00	2.19306	-336.843
22:18:00	2.2	-348.233
22:28:00	2.20694	-361.51
22:38:00	2.21389	-350.958
22:48:00	2.22083	-371.602
22:58:00	2.22778	-367.009
23:08:00	2.23472	-365.408
23:18:00	2.24167	-358.764
23:28:00	2.24861	-372.031
23:38:00	2.25556	-368.728
23:48:00	2.2625	-376.769
23:58:00	2.26944	-370.572
00:08:00	2.27639	-372.675
00:18:00	2.28333	-378.3
00:28:00	2.29028	-379.533
00:38:00	2.29722	-361.068
00:48:00	2.30417	-377.67
00:58:00	2.31111	-367.011
01:08:00	2.31806	-350.763
01:18:00	2.325	-359.197
01:28:00	2.33194	-353.726
01:38:00	2.33889	-339.104
01:48:00	2.34583	-353.247
01:58:00	2.35278	-336.844
02:08:00	2.35972	-348.628
02:18:00	2.36667	-339.94
02:28:00	2.37361	-321.146
02:38:00	2.38056	-318.184
02:48:00	2.3875	-324.332
02:58:00	2.39444	-310.604
03:08:00	2.40139	-312.91
03:18:00	2.40833	-277.334
03:28:00	2.41528	-261.703
03:38:00	2.42222	-274.928
03:48:00	2.42917	-270.893
03:58:00	2.43611	-248.069
04:08:00	2.44306	-259.256
04:18:00	2.45	-226.768
04:28:00	2.45694	-223.563
04:38:00	2.46389	-214.999
04:48:00	2.47083	-199.784
04:58:00	2.47778	-207.911
05:08:00	2.48472	-187.393
05:18:00	2.49167	-166.842
05:28:00	2.49861	-160.614
05:38:00	2.50556	-128.737
05:48:00	2.5125	-133.156
05:58:00	2.51944	-119.464
06:08:00	2.52639	-100.347
06:18:00	2.53333	-63.949
06:28:00	2.54028	-89.933
06:38:00	2.54722	-59.5
06:48:00	2.55417	-54.241
06:58:00	2.56111	-46.595
07:08:00	2.56806	-31.478
07:18:00	2.575	-24.335
07:28:00	2.58194	-7.492
07:38:00	2.58889	-6.734
07:48:00	2.59583	-5.132
07:58:00	2.60278	27.311
08:08:00	2.60972	33.167
08:18:00	2.61667	23.345
08:28:00	2.62361	58.027
08:38:00	2.63056	56.896
08:48:00	2.6375	65.981
08:58:00	2.64444	71.779
09:08:00	2.65139	83.238
09:18:00	2.65833	79.285
09:28:00	2.66528	88.532
09:38:00	2.67222	99.394
09:48:00	2.67917	102.884
09:58:00	2.68611	97.64
10:08:00	2.69306	120.569
10:18:00	2.7	102.316
10:28:00	2.70694	99.444
10:38:00	2.71389	98.96
10:48:00	2.72083	110.568
10:58:00	2.72778	116.547
11:08:00	2.73472	111.059
11:18:00	2.74167	126.836
11:28:00	2.74861	129.119
11:38:00	2.75556	131.326
11:48:00	2.7625	119.842
11:58:00	2.76944	122.5
12:08:00	2.77639	120.33
12:18:00	2.78333	128.802
12:28:00	2.79028	129.116
12:38:00	2.79722	113.452
12:48:00	2.80417	118.3
12:58:00	2.81111	108.96
13:08:00	2.81806	107.958
13:18:00	2.825	111.048
13:28:00	2.83194	114.1
13:38:00	2.83889	107.373
13:48:00	2.84583	92.873
13:58:00	2.85278	84.169
14:08:00	2.85972	95.567
14:18:00	2.86667	77.606
14:28:00	2.87361	87.251
14:38:00	2.88056	59.177
14:48:00	2.8875	44.381
14:58:00	2.89444	39.46
15:08:00	2.90139	35.571
15:18:00	2.90833	29.932
15:28:00	2.91528	23.361
15:38:00	2.92222	3.57
15:48:00	2.92917	2.126
15:58:00	2.93611	-7.331
16:08:00	2.94306	-14.921
16:18:00	2.95	-17.868
16:28:00	2.95694	-14.998
16:38:00	2.96389	-42.689
16:48:00	2.97083	-57.879
16:58:00	2.97778	-70.196
17:08:00	2.98472	-65.948
17:18:00	2.99167	-68.765
17:28:00	2.99861	-91.741
17:38:00	3.00556	-100.508
17:48:00	3.0125	-95.522
17:58:00	3.01944	-125.073
18:08:00	3.02639	-123.326
18:18:00	3.03333	-138.057
18:28:00	3.04028	-145.742
18:38:00	3.04722	-147.509
18:48:00	3.05417	-149.184
18:58:00	3.06111	-162.951
19:08:00	3.06806	-164.982
19:18:00	3.075	-163.698
19:28:00	3.08194	-186.746
19:38:00	3.08889	-187.209
19:48:00	3.09583	-195.355
19:58:00	3.10278	-208.623
20:08:00	3.10972	-218.4
20:18:00	3.11667	-228.125
20:28:00	3.12361	-217.343
20:38:00	3.13056	-226.81
20:48:00	3.1375	-240.915
20:58:00	3.14444	-238.08
21:08:00	3.15139	-242.809
21:18:00	3.15833	-249.898
21:28:00	3.16528	-253.176
21:38:00	3.17222	-258.415
21:48:00	3.17917	-262.287
21:58:00	3.18611	-263.801
22:08:00	3.19306	-273.665
22:18:00	3.2	-279.635
22:28:00	3.20694	-275.751
22:38:00	3.21389	-294.672
22:48:00	3.22083	-281.461
22:58:00	3.22778	-287.954
23:08:00	3.23472	-293.614
23:18:00	3.24167	-285.62
23:28:00	3.24861	-277.66
23:38:00	3.25556	-278.892
23:48:00	3.2625	-285.962
23:58:00	3.26944	-264.365
00:08:00	3.27639	-265.087
00:18:00	3.28333	-280.984
00:28:00	3.29028	-281.158
00:38:00	3.29722	-267.499
00:48:00	3.30417	-258.92
00:58:00	3.31111	-273.664
01:08:00	3.31806	-259.827
01:18:00	3.325	-263.315
01:28:00	3.33194	-246.43
01:38:00	3.33889	-264.751
01:48:00	3.34583	-239.112
01:58:00	3.35278	-219.662
02:08:00	3.35972	-225.505
02:18:00	3.36667	-219.261
02:28:00	3.37361	-206.378
02:38:00	3.38056	-206.453
02:48:00	3.3875	-199.88
02:58:00	3.39444	-187.891
03:08:00	3.40139	-171.743
03:18:00	3.40833	-183.257
03:28:00	3.41528	-180.178
03:38:00	3.42222	-162.373
03:48:00	3.42917	-143.901
03:58:00	3.43611	-141.503
04:08:00	3.44306	-126.647
04:18:00	3.45	-109.168
04:28:00	3.45694	-93.957
04:38:00	3.46389	-94.133
04:48:00	3.47083	-90.843
04:58:00	3.47778	-72.732
05:08:00	3.48472	-41.326
05:18:00	3.49167	-75.433
05:28:00	3.49861	-61.345
05:38:00	3.50556	-49.262
05:48:00	3.5125	-33.482
05:58:00	3.51944	-31.194
06:08:00	3.52639	-13.331
06:18:00	3.53333	-6.031
06:28:00	3.54028	0.743
06:38:00	3.54722	8.303
06:48:00	3.55417	34.999
06:58:00	3.56111	45.368
07:08:00	3.56806	41.893
07:18:00	3.575	61.492
07:28:00	3.58194	64.681
07:38:00	3.58889	74.313
07:48:00	3.59583	89.53
07:58:00	3.60278	90.881
08:08:00	3.60972	99.413
08:18:00	3.61667	106.445
08:28:00	3.62361	103.821
08:38:00	3.63056	108.229
08:48:00	3.6375	107.87
08:58:00	3.64444	121.157
09:08:00	3.65139	135.253
09:18:00	3.65833	146.206
09:28:00	3.66528	129.555
09:38:00	3.67222	149.952
09:48:00	3.67917	126.048
09:58:00	3.68611	129.667
10:08:00	3.69306	135.385
10:18:00	3.7	123.252
10:28:00	3.70694	116.563
10:38:00	3.71389	117.668
10:48:00	3.72083	127.017
10:58:00	3.72778	139.961
11:08:00	3.73472	128.837
11:18:00	3.74167	110.545
11:28:00	3.74861	128.173
11:38:00	3.75556	135.616
11:48:00	3.7625	131.066
11:58:00	3.76944	112.647
12:08:00	3.77639	130.014
12:18:00	3.78333	109.473
12:28:00	3.79028	86.001
12:38:00	3.79722	102.916
12:48:00	3.80417	75.718
12:58:00	3.81111	72.718
13:08:00	3.81806	94.04
13:18:00	3.825	75.345
13:28:00	3.83194	47.956
13:38:00	3.83889	72.977
13:48:00	3.84583	47.569
13:58:00	3.85278	31.226
14:08:00	3.85972	42.013
14:18:00	3.86667	1.357
14:28:00	3.87361	39.696
14:38:00	3.88056	9.575
14:48:00	3.8875	2.706
14:58:00	3.89444	3.274
15:08:00	3.90139	9.725
15:18:00	3.90833	-12.038
15:28:00	3.91528	-27.665
15:38:00	3.92222	-37.527
15:48:00	3.92917	-66.314
15:58:00	3.93611	-61.052
16:08:00	3.94306	-94.091
16:18:00	3.95	-94.006
16:28:00	3.95694	-104.505
16:38:00	3.96389	-104.408
16:48:00	3.97083	-132.505
16:58:00	3.97778	-139.669
17:08:00	3.98472	-138.453
17:18:00	3.99167	-173.591
17:28:00	3.99861	-198.768
17:38:00	4.00556	-203.907
17:48:00	4.0125	-186.657
17:58:00	4.01944	-191.03
18:08:00	4.02639	-239.552
18:18:00	4.03333	-234.745
18:28:00	4.04028	-252.578
18:38:00	4.04722	-253.404
18:48:00	4.05417	-284.856
18:58:00	4.06111	-275.316
19:08:00	4.06806	-289.246
19:18:00	4.075	-307.474
19:28:00	4.08194	-298.463
19:38:00	4.08889	-291.483
19:48:00	4.09583	-328.973
19:58:00	4.10278	-324.215
20:08:00	4.10972	-351.373
20:18:00	4.11667	-362.17
20:28:00	4.12361	-362.116
20:38:00	4.13056	-372.48
20:48:00	4.1375	-370.663
20:58:00	4.14444	-376.539
21:08:00	4.15139	-391.132
21:18:00	4.15833	-392.997
21:28:00	4.16528	-386.331
21:38:00	4.17222	-377.094
21:48:00	4.17917	-413.365
21:58:00	4.18611	-414.336
22:08:00	4.19306	-432.918
22:18:00	4.2	-421.157
22:28:00	4.20694	-413.583
22:38:00	4.21389	-430.525
22:48:00	4.22083	-412.521
22:58:00	4.22778	-409.41
23:08:00	4.23472	-412.522
23:18:00	4.24167	-400.478
23:28:00	4.24861	-406.669
23:38:00	4.25556	-405.167
23:48:00	4.2625	-402.094
23:58:00	4.26944	-399.649
00:08:00	4.27639	-392.263
00:18:00	4.28333	-380.345
00:28:00	4.29028	-383.248
00:38:00	4.29722	-355.719
00:48:00	4.30417	-376.966
00:58:00	4.31111	-376.208
01:08:00	4.31806	-339.263
01:18:00	4.325	-334.326
01:28:00	4.33194	-331.087
01:38:00	4.33889	-328.302
01:48:00	4.34583	-300.235
01:58:00	4.35278	-262.11
02:08:00	4.35972	-254.746
02:18:00	4.36667	-262.261
02:28:00	4.37361	-229.783
02:38:00	4.38056	-233.982
02:48:00	4.3875	-203.288
02:58:00	4.39444	-177.793
03:08:00	4.40139	-196.86
03:18:00	4.40833	-162.919
03:28:00	4.41528	-149.696
03:38:00	4.42222	-128.419
03:48:00	4.42917	-127.536
03:58:00	4.43611	-119.398
04:08:00	4.44306	-135.507
04:18:00	4.45	-77.787
04:28:00	4.45694	-62.468
04:38:00	4.46389	-32.857
04:48:00	4.47083	-25.138
04:58:00	4.47778	-23.817
05:08:00	4.48472	-18.439
05:18:00	4.49167	-0.59
05:28:00	4.49861	24.171
05:38:00	4.50556	64.029
05:48:00	4.5125	73.385
05:58:00	4.51944	112.123
06:08:00	4.52639	109.001
06:18:00	4.53333	122.144
06:28:00	4.54028	106.268
06:38:00	4.54722	150.665
06:48:00	4.55417	151.5
06:58:00	4.56111	166.272
07:08:00	4.56806	194.262
07:18:00	4.575	230.896
07:28:00	4.58194	195.322
07:38:00	4.58889	234.096
07:48:00	4.59583	220.222
07:58:00	4.60278	219.413
08:08:00	4.60972	276.73
08:18:00	4.61667	236.507
08:28:00	4.62361	267.226
08:38:00	4.63056	249.341
08:48:00	4.6375	283.199
08:58:00	4.64444	263.19
09:08:00	4.65139	280.141
09:18:00	4.65833	297.461
09:28:00	4.66528	284.327
09:38:00	4.67222	275.165
09:48:00	4.67917	321.72
09:58:00	4.68611	297.854
10:08:00	4.69306	305.529
10:18:00	4.7	312.262
10:28:00	4.70694	316.582
10:38:00	4.71389	346.03
10:48:00	4.72083	330.453
10:58:00	4.72778	313.291
11:08:00	4.73472	291.144
11:18:00	4.74167	261.779
11:28:00	4.74861	276.499
11:38:00	4.75556	226.293
11:48:00	4.7625	240.717
11:58:00	4.76944	233.35
12:08:00	4.77639	210.01
12:18:00	4.78333	172.92
12:28:00	4.79028	131.802
12:38:00	4.79722	180.276
12:48:00	4.80417	152.089
12:58:00	4.81111	175.58
13:08:00	4.81806	173.527
13:18:00	4.825	79.623
13:28:00	4.83194	147.197
13:38:00	4.83889	146.1
13:48:00	4.84583	110.311
13:58:00	4.85278	34.772
14:08:00	4.85972	73.416
14:18:00	4.86667	57.471
14:28:00	4.87361	11.466
14:38:00	4.88056	-10.302
14:48:00	4.8875	-54.05
14:58:00	4.89444	-76.838
15:08:00	4.90139	-68.871
15:18:00	4.90833	-103.077
15:28:00	4.91528	-103.697
15:38:00	4.92222	-118.624
15:48:00	4.92917	-166.045
15:58:00	4.93611	-178.5
16:08:00	4.94306	-187.043
16:18:00	4.95	-181.956
16:28:00	4.95694	-215.051
16:38:00	4.96389	-268.237
16:48:00	4.97083	-272.094
16:58:00	4.97778	-306.532
17:08:00	4.98472	-301.391
17:18:00	4.99167	-323.877
17:28:00	4.99861	-312.098
17:38:00	5.00556	-370.768
17:48:00	5.0125	-342.427
17:58:00	5.01944	-389.417
18:08:00	5.02639	-421.557
18:18:00	5.03333	-439.089
18:28:00	5.04028	-472.122
18:38:00	5.04722	-491.685
18:48:00	5.05417	-460.597
18:58:00	5.06111	-469.871
19:08:00	5.06806	-501.071
19:18:00	5.075	-513.261
19:28:00	5.08194	-504.43
19:38:00	5.08889	-569.678
19:48:00	5.09583	-554.974
19:58:00	5.10278	-558.269
20:08:00	5.10972	-559.227
20:18:00	5.11667	-563.712
20:28:00	5.12361	-516.942
20:38:00	5.13056	-533.221
20:48:00	5.1375	-506.044
20:58:00	5.14444	-568.311
21:08:00	5.15139	-576.177
21:18:00	5.15833	-581.786
21:28:00	5.16528	-596.033
21:38:00	5.17222	-601.251
21:48:00	5.17917	-532.891
21:58:00	5.18611	-549.262
22:08:00	5.19306	-580.275
22:18:00	5.2	-577.241
22:28:00	5.20694	-528.162
22:38:00	5.21389	-499.007
22:48:00	5.22083	-480.765
22:58:00	5.22778	-468.811
23:08:00	5.23472	-425.666
23:18:00	5.24167	-458.435
23:28:00	5.24861	-417.434
23:38:00	5.25556	-421.667
23:48:00	5.2625	-419.758
23:58:00	5.26944	-405.904
00:08:00	5.27639	-357.404
00:18:00	5.28333	-390.105
00:28:00	5.29028	-320.894
00:38:00	5.29722	-310.184
00:48:00	5.30417	-329.412
00:58:00	5.31111	-249.271
01:08:00	5.31806	-237.304
01:18:00	5.325	-204.615
01:28:00	5.33194	-193.699
01:38:00	5.33889	-171.02
01:48:00	5.34583	-181.016
01:58:00	5.35278	-110.247
02:08:00	5.35972	-25.857
02:18:00	5.36667	-65.535
02:28:00	5.37361	-18.836
02:38:00	5.38056	12.481
02:48:00	5.3875	83.185
02:58:00	5.39444	69.747
03:08:00	5.40139	29.017
03:18:00	5.40833	164.307
03:28:00	5.41528	170.176
03:38:00	5.42222	216.493
03:48:00	5.42917	181.447
03:58:00	5.43611	267.413
04:08:00	5.44306	326.098
04:18:00	5.45	325.598
04:28:00	5.45694	395.588
04:38:00	5.46389	410.338
04:48:00	5.47083	426.2
04:58:00	5.47778	447.446
05:08:00	5.48472	468.62
05:18:00	5.49167	497.7
05:28:00	5.49861	485.263
05:38:00	5.50556	537.211
05:48:00	5.5125	603.061
05:58:00	5.51944	606.129
06:08:00	5.52639	533.406
06:18:00	5.53333	583.619
06:28:00	5.54028	591.486
06:38:00	5.54722	654.709
06:48:00	5.55417	692.024
06:58:00	5.56111	683.032
07:08:00	5.56806	732.859
07:18:00	5.575	773.149
07:28:00	5.58194	729.092
07:38:00	5.58889	676.013
07:48:00	5.59583	675.776
07:58:00	5.60278	702.142
08:08:00	5.60972	662.091
08:18:00	5.61667	663.494
08:28:00	5.62361	709.769
08:38:00	5.63056	713.395
08:48:00	5.6375	665.314
08:58:00	5.64444	657.951
09:08:00	5.65139	669.259
09:18:00	5.65833	687.036
09:28:00	5.66528	692.052
09:38:00	5.67222	639.408
09:48:00	5.67917	632.952
09:58:00	5.68611	625.176
10:08:00	5.69306	584.057
10:18:00	5.7	565.89
10:28:00	5.70694	626.252
10:38:00	5.71389	550.954
10:48:00	5.72083	532.848
10:58:00	5.72778	661.079
11:08:00	5.73472	609.912
11:18:00	5.74167	583.158
11:28:00	5.74861	495.328
11:38:00	5.75556	449.741
11:48:00	5.7625	443.036
11:58:00	5.76944	434.834
12:08:00	5.77639	358.426
12:18:00	5.78333	331.79
12:28:00	5.79028	403.258
12:38:00	5.79722	393.512
12:48:00	5.80417	348.618
12:58:00	5.81111	342.171
13:08:00	5.81806	240.112
13:18:00	5.825	234.793
13:28:00	5.83194	205.601
13:38:00	5.83889	183.49
13:48:00	5.84583	190.5
13:58:00	5.85278	208.83
14:08:00	5.85972	177.346
14:18:00	5.86667	117.96
14:28:00	5.87361	107.251
14:38:00	5.88056	42.943
14:48:00	5.8875	-19.259
14:58:00	5.89444	-68.361
15:08:00	5.90139	-71.23
15:18:00	5.90833	-1.75
15:28:00	5.91528	-63.047
15:38:00	5.92222	-109.469
15:48:00	5.92917	-192.418
15:58:00	5.93611	-137.203
16:08:00	5.94306	-153.416
16:18:00	5.95	-246.259
16:28:00	5.95694	-246.649
16:38:00	5.96389	-238.755
16:48:00	5.97083	-258.453
16:58:00	5.97778	-286.475
17:08:00	5.98472	-313.085
17:18:00	5.99167	-374.758
17:28:00	5.99861	-298.651
17:38:00	6.00556	-312.467
17:48:00	6.0125	-372.098
17:58:00	6.01944	-378.21
18:08:00	6.02639	-370.919
18:18:00	6.03333	-481.633
18:28:00	6.04028	-404.816
18:38:00	6.04722	-406.691
18:48:00	6.05417	-382.922
18:58:00	6.06111	-390.497
19:08:00	6.06806	-494.422
19:18:00	6.075	-453.123
19:28:00	6.08194	-469.689
19:38:00	6.08889	-467.348
19:48:00	6.09583	-423.885
19:58:00	6.10278	-474.117
20:08:00	6.10972	-459.732
20:18:00	6.11667	-396.188
20:28:00	6.12361	-413.762
20:38:00	6.13056	-481.321
20:48:00	6.1375	-482.346
20:58:00	6.14444	-409.919
21:08:00	6.15139	-452.029
21:18:00	6.15833	-430.638
21:28:00	6.16528	-408.048
21:38:00	6.17222	-301.135
21:48:00	6.17917	-366.437
21:58:00	6.18611	-367.555
22:08:00	6.19306	-283.978
22:18:00	6.2	-177.595
22:28:00	6.20694	-205.327
22:38:00	6.21389	-281.997
22:48:00	6.22083	-249.693
22:58:00	6.22778	-102.239
23:08:00	6.23472	-135.185
23:18:00	6.24167	-115.892
23:28:00	6.24861	-37.105
23:38:00	6.25556	-79.82
23:48:00	6.2625	2.011
23:58:00	6.26944	-19.158
00:08:00	6.27639	-7.293
00:18:00	6.28333	60.666
00:28:00	6.29028	89.848
00:38:00	6.29722	105.762
00:48:00	6.30417	148.531
00:58:00	6.31111	235.775
01:08:00	6.31806	217.609
01:18:00	6.325	250.112
01:28:00	6.33194	311.848
01:38:00	6.33889	320.128
01:48:00	6.34583	335.612
01:58:00	6.35278	307.66
02:08:00	6.35972	344.112
02:18:00	6.36667	468.84
02:28:00	6.37361	517.183
02:38:00	6.38056	500.093
02:48:00	6.3875	570.212
02:58:00	6.39444	508.286
03:08:00	6.40139	590.983
03:18:00	6.40833	570.912
03:28:00	6.41528	654.052
03:38:00	6.42222	712.217
03:48:00	6.42917	646.442
03:58:00	6.43611	722.731
04:08:00	6.44306	691.404
04:18:00	6.45	748.597
04:28:00	6.45694	775.26
04:38:00	6.46389	773.877
04:48:00	6.47083	759.335
04:58:00	6.47778	825.398
05:08:00	6.48472	826.586
05:18:00	6.49167	805.884
05:28:00	6.49861	785.06
05:38:00	6.50556	846.738
05:48:00	6.5125	855.041
05:58:00	6.51944	897.718
06:08:00	6.52639	886.289
06:18:00	6.53333	885.698
06:28:00	6.54028	928.441
06:38:00	6.54722	830.45
06:48:00	6.55417	798.106
06:58:00	6.56111	855.398
07:08:00	6.56806	860.358
07:18:00	6.575	870.486
07:28:00	6.58194	830.093
07:38:00	6.58889	935.94
07:48:00	6.59583	877.449
07:58:00	6.60278	818.42
08:08:00	6.60972	743.651
08:18:00	6.61667	815.939
08:28:00	6.62361	686.056
08:38:00	6.63056	751.04
08:48:00	6.6375	671.237
08:58:00	6.64444	672.462
09:08:00	6.65139	636.584
09:18:00	6.65833	639.941
09:28:00	6.66528	608.96
09:38:00	6.67222	545.646
09:48:00	6.67917	535.108
09:58:00	6.68611	603.131
10:08:00	6.69306	416.003
10:18:00	6.7	417.399
10:28:00	6.70694	454.477
10:38:00	6.71389	383.499
10:48:00	6.72083	358.473
10:58:00	6.72778	317.357
11:08:00	6.73472	319.897
11:18:00	6.74167	370.11
11:28:00	6.74861	292.899
11:38:00	6.75556	328.466
11:48:00	6.7625	212.267
11:58:00	6.76944	235.736
12:08:00	6.77639	154.444
12:18:00	6.78333	80.879
12:28:00	6.79028	104.371
12:38:00	6.79722	106.009
12:48:00	6.80417	128.293
12:58:00	6.81111	63.45
13:08:00	6.81806	80.238
13:18:00	6.825	66.343
13:28:00	6.83194	-27.437
13:38:00	6.83889	-2.65
13:48:00	6.84583	-62.613
13:58:00	6.85278	-30.245
14:08:00	6.85972	-38.126
14:18:00	6.86667	-60.237
14:28:00	6.87361	-101.62
14:38:00	6.88056	-69.064
14:48:00	6.8875	-36.461
14:58:00	6.89444	-57.894
15:08:00	6.90139	-142.858
15:18:00	6.90833	-117.763
15:28:00	6.91528	-121.43
15:38:00	6.92222	-141.46
15:48:00	6.92917	-151.833
15:58:00	6.93611	-157.993
16:08:00	6.94306	-178
16:18:00	6.95	-101.36
16:28:00	6.95694	-133.885
16:38:00	6.96389	-66.982
16:48:00	6.97083	-78.897
16:58:00	6.97778	-133.192
17:08:00	6.98472	-157.249
17:18:00	6.99167	-101.011
17:28:00	6.99861	-56.819
17:38:00	7.00556	-106.375
17:48:00	7.0125	-119.987
17:58:00	7.01944	-89.601
18:08:00	7.02639	-86.166
18:18:00	7.03333	-31.286
18:28:00	7.04028	-83.992
18:38:00	7.04722	-110.943
18:48:00	7.05417	-27.474
18:58:00	7.06111	49.134
19:08:00	7.06806	-21.396
19:18:00	7.075	-42.13
19:28:00	7.08194	32.561
19:38:00	7.08889	74.158
19:48:00	7.09583	97.151
19:58:00	7.10278	85.346
20:08:00	7.10972	92.175
20:18:00	7.11667	149.427
20:28:00	7.12361	117.843
20:38:00	7.13056	138.238
20:48:00	7.1375	157.196
20:58:00	7.14444	176.277
21:08:00	7.15139	203.667
21:18:00	7.15833	194.964
21:28:00	7.16528	244.669
21:38:00	7.17222	233.156
21:48:00	7.17917	163.307
21:58:00	7.18611	280.418
22:08:00	7.19306	280.029
22:18:00	7.2	338.491
22:28:00	7.20694	300.766
22:38:00	7.21389	252.237
22:48:00	7.22083	322.561
22:58:00	7.22778	325.968
23:08:00	7.23472	398.758
23:18:00	7.24167	409.131
23:28:00	7.24861	387.586
23:38:00	7.25556	426.369
23:48:00	7.2625	377.646
23:58:00	7.26944	355.826
00:08:00	7.27639	430.916
00:18:00	7.28333	433.775
00:28:00	7.29028	458.466
00:38:00	7.29722	404.23
00:48:00	7.30417	372.745
00:58:00	7.31111	386.12
01:08:00	7.31806	380.314
01:18:00	7.325	381.334
01:28:00	7.33194	350.678
01:38:00	7.33889	309.195
01:48:00	7.34583	283.099
01:58:00	7.35278	382.977
02:08:00	7.35972	322.5
02:18:00	7.36667	309.998
02:28:00	7.37361	325.478
02:38:00	7.38056	298.777
02:48:00	7.3875	239.978
02:58:00	7.39444	217.138
03:08:00	7.40139	107.863
03:18:00	7.40833	149.004
03:28:00	7.41528	121.301
03:38:00	7.42222	79.572
03:48:00	7.42917	20.163
03:58:00	7.43611	17.689
04:08:00	7.44306	-0.739
04:18:00	7.45	-56.047
04:28:00	7.45694	-113.241
04:38:00	7.46389	-156.16
04:48:00	7.47083	-151.013
04:58:00	7.47778	-152.481
05:08:00	7.48472	-153.126
05:18:00	7.49167	-156.949
05:28:00	7.49861	-241.889
05:38:00	7.50556	-213.08
05:48:00	7.5125	-244.23
05:58:00	7.51944	-263.047
06:08:00	7.52639	-274.547
06:18:00	7.53333	-331.616
06:28:00	7.54028	-327.375
06:38:00	7.54722	-364.885
06:48:00	7.55417	-366.164
06:58:00	7.56111	-325.026
07:08:00	7.56806	-375.518
07:18:00	7.575	-393.234
07:28:00	7.58194	-398.67
07:38:00	7.58889	-406.264
07:48:00	7.59583	-442.522
07:58:00	7.60278	-427.146
08:08:00	7.60972	-417.909
08:18:00	7.61667	-460.087
08:28:00	7.62361	-466.619
08:38:00	7.63056	-421.308
08:48:00	7.6375	-420.843
08:58:00	7.64444	-388.298
09:08:00	7.65139	-365.883
09:18:00	7.65833	-378.058
09:28:00	7.66528	-327.239
09:38:00	7.67222	-334.061
09:48:00	7.67917	-331.386
09:58:00	7.68611	-295.328
10:08:00	7.69306	-297.704
10:18:00	7.7	-234.495
10:28:00	7.70694	-245.901
10:38:00	7.71389	-193.81
10:48:00	7.72083	-145.958
10:58:00	7.72778	-83.282
11:08:00	7.73472	-85.926
11:18:00	7.74167	-30.191
11:28:00	7.74861	13.694
11:38:00	7.75556	68.889
11:48:00	7.7625	78.818
11:58:00	7.76944	147.309
12:08:00	7.77639	164.835
12:18:00	7.78333	173.68
12:28:00	7.79028	239.128
12:38:00	7.79722	277.955
12:48:00	7.80417	338.064
12:58:00	7.81111	377.435
13:08:00	7.81806	438.193
13:18:00	7.825	487.561
13:28:00	7.83194	513.648
13:38:00	7.83889	549.987
13:48:00	7.84583	618.72
13:58:00	7.85278	641.968
14:08:00	7.85972	666.552
14:18:00	7.86667	707.432
14:28:00	7.87361	756.991
14:38:00	7.88056	826.085
14:48:00	7.8875	854.35
14:58:00	7.89444	908.27
15:08:00	7.90139	943.176
15:18:00	7.90833	992.578
15:28:00	7.91528	1027.13
15:38:00	7.92222	1041.54
15:48:00	7.92917	1065.58
15:58:00	7.93611	1108.61
16:08:00	7.94306	1146.37
16:18:00	7.95	1183.96
16:28:00	7.95694	1191.15
16:38:00	7.96389	1182.15
16:48:00	7.97083	1224.36
16:58:00	7.97778	1252.54
17:08:00	7.98472	1249.64
17:18:00	7.99167	1236.37
17:28:00	7.99861	1243.19
17:38:00	8.00556	1199.96
17:48:00	8.0125	1202.98
17:58:00	8.01944	1194.68
18:08:00	8.02639	1152.37
18:18:00	8.03333	1132.27
18:28:00	8.04028	1128.38
18:38:00	8.04722	1083.11
18:48:00	8.05417	1057.66
18:58:00	8.06111	1052.78
19:08:00	8.06806	1050.84
19:18:00	8.075	991.117
19:28:00	8.08194	972.676
19:38:00	8.08889	946.914
19:48:00	8.09583	911.8
19:58:00	8.10278	854.723
20:08:00	8.10972	842.607
20:18:00	8.11667	823.336
20:28:00	8.12361	774.368
20:38:00	8.13056	721.283
20:48:00	8.1375	676.141
20:58:00	8.14444	655.302
21:08:00	8.15139	587.474
21:18:00	8.15833	588.503
21:28:00	8.16528	570.871
21:38:00	8.17222	514.174
21:48:00	8.17917	431.698
21:58:00	8.18611	431.265
22:08:00	8.19306	382.933
22:18:00	8.2	353.384
22:28:00	8.20694	318.291
22:38:00	8.21389	288.985
22:48:00	8.22083	227.479
22:58:00	8.22778	199.786
23:08:00	8.23472	156.212
23:18:00	8.24167	142.836
23:28:00	8.24861	92.773
23:38:00	8.25556	40.846
23:48:00	8.2625	-3.05
23:58:00	8.26944	-11.192
00:08:00	8.27639	-46.726
00:18:00	8.28333	-91.106
00:28:00	8.29028	-108.788
00:38:00	8.29722	-125.506
00:48:00	8.30417	-154.498
00:58:00	8.31111	-175.932
01:08:00	8.31806	-200.267
01:18:00	8.325	-231.505
01:28:00	8.33194	-259.411
01:38:00	8.33889	-282.096
01:48:00	8.34583	-314.142
01:58:00	8.35278	-301.523
02:08:00	8.35972	-314.435
02:18:00	8.36667	-335.52
02:28:00	8.37361	-364.186
02:38:00	8.38056	-385.61
02:48:00	8.3875	-409.722
02:58:00	8.39444	-438.977
03:08:00	8.40139	-467.282
03:18:00	8.40833	-482.448
03:28:00	8.41528	-465.035
03:38:00	8.42222	-484.437
03:48:00	8.42917	-480.51
03:58:00	8.43611	-502.12
04:08:00	8.44306	-514.88
04:18:00	8.45	-505.855
04:28:00	8.45694	-555.438
04:38:00	8.46389	-548.297
04:48:00	8.47083	-554.851
04:58:00	8.47778	-550.45
05:08:00	8.48472	-555.219
05:18:00	8.49167	-569.161
05:28:00	8.49861	-587.318
05:38:00	8.50556	-574.525
05:48:00	8.5125	-587.51
05:58:00	8.51944	-585.281
06:08:00	8.52639	-579.716
06:18:00	8.53333	-604.312
06:28:00	8.54028	-592.738
06:38:00	8.54722	-622.569
06:48:00	8.55417	-612.023
06:58:00	8.56111	-624.908
07:08:00	8.56806	-607.851
07:18:00	8.575	-632.03
07:28:00	8.58194	-614.363
07:38:00	8.58889	-621.227
07:48:00	8.59583	-616.958
07:58:00	8.60278	-604.454
08:08:00	8.60972	-630.3
08:18:00	8.61667	-611.564
08:28:00	8.62361	-594.847
08:38:00	8.63056	-586.956
08:48:00	8.6375	-599.731
08:58:00	8.64444	-589.714
09:08:00	8.65139	-609.136
09:18:00	8.65833	-581.768
09:28:00	8.66528	-587.363
09:38:00	8.67222	-585.948
09:48:00	8.67917	-582.237
09:58:00	8.68611	-578.162
10:08:00	8.69306	-567.101
10:18:00	8.7	-590.757
10:28:00	8.70694	-557.452
10:38:00	8.71389	-564.042
10:48:00	8.72083	-574.208
10:58:00	8.72778	-567.238
11:08:00	8.73472	-573.138
11:18:00	8.74167	-567.066
11:28:00	8.74861	-540.988
11:38:00	8.75556	-565.226
11:48:00	8.7625	-547.815
11:58:00	8.76944	-529.184
12:08:00	8.77639	-538.937
12:18:00	8.78333	-540.869
12:28:00	8.79028	-532.689
12:38:00	8.79722	-539.611
12:48:00	8.80417	-527.986
12:58:00	8.81111	-547.19
13:08:00	8.81806	-548.525
13:18:00	8.825	-522.648
13:28:00	8.83194	-514.976
13:38:00	8.83889	-527.397
13:48:00	8.84583	-528.518
13:58:00	8.85278	-517.058
14:08:00	8.85972	-473.697
14:18:00	8.86667	-507.426
14:28:00	8.87361	-499.407
14:38:00	8.88056	-476.674
14:48:00	8.8875	-519.976
14:58:00	8.89444	-534.441
15:08:00	8.90139	-517.763
15:18:00	8.90833	-517.518
15:28:00	8.91528	-515.821
15:38:00	8.92222	-523.932
15:48:00	8.92917	-506.997
15:58:00	8.93611	-499.948
16:08:00	8.94306	-501.015
16:18:00	8.95	-463.911
16:28:00	8.95694	-465.143
16:38:00	8.96389	-480.472
16:48:00	8.97083	-472.013
16:58:00	8.97778	-470.849
17:08:00	8.98472	-446.306
17:18:00	8.99167	-442.432
17:28:00	8.99861	-449.142
17:38:00	9.00556	-444.349
17:48:00	9.0125	-439.499
17:58:00	9.01944	-421.496
18:08:00	9.02639	-405.058
18:18:00	9.03333	-392.472
