# Supplementary material for: The nutrient-sensing GCN2 signaling pathway is essential for circadian clock function by regulating histone acetylation under amino acid starvation
Source: eLife journal article supplement (doi:10.7554/elife.85241), 2023-04-21
Supplement: fig1-figsupp2-data3 [file Figure 1-figure supplement 2-source data 3-2.xlsx]

## Sheet: FRQ rhythm+0mM 3-AT
Hrs in DD	WT	WT	WT	cpc-3ko	cpc-3ko	cpc-3ko	cpc-1ko	cpc-1ko	cpc-1ko
0	1	1	1	1.08962	1.0566	1.04664	0.889611	0.832321	1.03685
4	0.604491	0.552314	0.622087	0.854509	0.859607	0.665745	0.612956	0.665295	0.610447
8	0.240331	0.267959	0.169816	0.273172	0.274073	0.289811	0.375001	0.216251	0.300784
12	0.085682	0.164462	0.141781	0.132959	0.103181	0.207979	0.218138	0.18726	0.212763
16	0.129898	0.209349	0.166422	0.1067	0.196033	0.083933	0.177032	0.263657	0.244863
20	0.690321	0.456098	0.509236	0.461515	0.413954	0.332158	0.327245	0.213189	0.349405
24	0.420761	0.408355	0.413595	0.490541	0.512213	0.298226	0.310715	0.536596	0.336504
28	0.218905	0.319478	0.234994	0.404417	0.238045	0.427362	0.277212	0.208626	0.330478
32	0.228712	0.176244	0.156382	0.231961	0.210501	0.310683	0.199104	0.301407	0.239896
36	0.176583	0.332137	0.278555	0.370828	0.304343	0.354616	0.213868	0.275572	0.201969
40	0.360423	0.325224	0.305521	0.425974	0.498104	0.253378	0.288641	0.395537	0.420468
44	0.26395	0.39344	0.264967	0.296586	0.51703	0.304642	0.243874	0.164076	0.256778
48	0.311484	0.272359	0.265083	0.221067	0.394394	0.192202	0.237233	0.230571	0.242393
