# Supplementary material for: The nutrient-sensing GCN2 signaling pathway is essential for circadian clock function by regulating histone acetylation under amino acid starvation
Source: eLife journal article supplement (doi:10.7554/elife.85241), 2023-04-21
Supplement: fig1-figsupp2-data4 [file Figure 1-figure supplement 2-source data 4-2.xlsx]

## Sheet: frq rhythm+0mM 3AT
Hrs in DD	WT	WT	WT	cpc-3ko	cpc-3ko	cpc-3ko	cpc-1ko	cpc-1ko	cpc-1ko
0	1	1	1	1.0645	0.899079	0.962083	1.14722	0.92536	0.991852
4	0.118566	0.139173	0.185645	0.068158	0.055086	0.07105	0.100796	0.223104	0.124294
8	0.157625	0.14079	0.248714	0.092644	0.048048	0.054922	0.144482	0.141238	0.207316
12	0.257395	0.17654	0.142643	0.126733	0.109557	0.116898	0.162641	0.182858	0.268226
16	0.549277	0.413744	0.505268	0.255254	0.42593	0.340592	0.286458	0.283006	0.25147
20	0.233827	0.258538	0.227936	0.22674	0.279674	0.326926	0.336414	0.371529	0.204605
24	0.177977	0.159404	0.164912	0.057583	0.172824	0.106034	0.11828	0.230315	0.151817
28	0.170588	0.136091	0.18228	0.067903	0.168932	0.073947	0.192616	0.198333	0.114845
32	0.387118	0.241195	0.336612	0.068386	0.186481	0.186284	0.122791	0.190086	0.237958
36	0.546262	0.554201	0.535949	0.429759	0.207438	0.318598	0.137862	0.194315	0.261208
40	0.491696	0.554321	0.541752	0.379703	0.377423	0.32736	0.376959	0.275809	0.299849
44	0.49981	0.428694	0.515524	0.335162	0.433281	0.3567	0.419378	0.340853	0.40909
48	0.276057	0.427688	0.279375	0.229091	0.229341	0.230355	0.333791	0.216828	0.370074
