# Supplementary material for: The nutrient-sensing GCN2 signaling pathway is essential for circadian clock function by regulating histone acetylation under amino acid starvation
Source: eLife journal article supplement (doi:10.7554/elife.85241), 2023-04-21
Supplement: fig2-data3 [file Figure 2-source data 3.xlsx]

## Sheet: WC2-ChIP+3mM 3-AT
Hrs in DD	WT	WT	WT	cpc-3KO	cpc-3KO	cpc-3KO
DD10	0.164	0.166	0.0959	0.0843	0.08531	0.101203
DD14	0.398628	0.335103	0.375703	0.0700755	0.0852505	0.0779087
DD18	0.522759	0.570996	0.563533	0.114619	0.0876963	0.0998233
DD22	0.234188	0.369963	0.336049	0.0908262	0.105835	0.104752
