# Supplementary material for: The nutrient-sensing GCN2 signaling pathway is essential for circadian clock function by regulating histone acetylation under amino acid starvation
Source: eLife journal article supplement (doi:10.7554/elife.85241), 2023-04-21
Supplement: fig2-data4 [file Figure 2-source data 4.xlsx]

## Sheet: WC2-ChIP+3mM 3-AT
Hrs in DD	WT	WT	WT	cpc-1KO	cpc-1KO	cpc-1KO
DD10	0.257171	0.180432	0.169727	0.0994518	0.0971997	0.116575
DD14	0.306946	0.278264	0.26119	0.150295	0.15042	0.119726
DD18	0.419583	0.394633	0.520665	0.0936625	0.0940134	0.102552
DD22	0.112326	0.104939	0.124168	0.149597	0.14796	0.157415
