# Supplementary material for: The nutrient-sensing GCN2 signaling pathway is essential for circadian clock function by regulating histone acetylation under amino acid starvation
Source: eLife journal article supplement (doi:10.7554/elife.85241), 2023-04-21
Supplement: fig2-figsupp1-data1 [file elife-85241-fig2-figsupp1-data1-v2.zip]

## Sheet: WC2-ChIP+0mM 3-AT
Hrs in DD	WT	WT	WT	cpc-3KO	cpc-3KO	cpc-3KO	cpc-1KO	cpc-1KO	cpc-1KO
DD10	0.105	0.076	0.106	0.057	0.065	0.034	0.035	0.038	0.032
DD14	0.32	0.257	0.299	0.263	0.217	0.206	0.165	0.176	0.142
DD18	0.256	0.213	0.202	0.124	0.088	0.091	0.266	0.221	0.203
DD22	0.041	0.02	0.019	0.056	0.025	0.033	0.029	0.016	0.05
