# Supplementary material for: The nutrient-sensing GCN2 signaling pathway is essential for circadian clock function by regulating histone acetylation under amino acid starvation
Source: eLife journal article supplement (doi:10.7554/elife.85241), 2023-04-21
Supplement: fig2-figsupp1-data4 [file Figure 2-figure supplement 1-source data 4.xlsx]

## Sheet: H3ac-ChIP-WT VS cpc1(0mM 3-AT)
Hrs in DD	WT	WT	WT	cpc-1KO	cpc-1KO	cpc-1KO
DD10	0.269584	0.408151	0.22574	0.342544	0.172181	0.239313
DD14	0.614493	0.453143	0.415972	0.380453	0.208778	0.40928
DD18	0.510531	0.663992	0.637532	0.30156	0.2397	0.4409
DD22	0.336348	0.537725	0.523406	0.412336	0.353515	0.297558
