# Supplementary material for: The nutrient-sensing GCN2 signaling pathway is essential for circadian clock function by regulating histone acetylation under amino acid starvation
Source: eLife journal article supplement (doi:10.7554/elife.85241), 2023-04-21
Supplement: fig3-data1 [file Figure 3-source data 1.xlsx]

## Sheet: H2B-ChIP
	0mM 3-AT	3mM 3-AT	7.5mM 3-AT	12mM 3-AT	15mM 3-AT
WT	0.237881	0.21302	0.229762	0.231085	0.294468
	0.208044	0.205906	0.207862	0.201245	0.234838
	0.188264	0.292974	0.273968	0.25274	0.300605
