# Supplementary material for: The nutrient-sensing GCN2 signaling pathway is essential for circadian clock function by regulating histone acetylation under amino acid starvation
Source: eLife journal article supplement (doi:10.7554/elife.85241), 2023-04-21
Supplement: fig3-data3 [file Figure 3-source data 3.xlsx]

## Sheet: H2B-ChIP-WT VS cpc-1KO(+3mM 3AT
Hrs in DD	WT	WT	WT	cpc-1ko	cpc-1ko	cpc-1ko	IgG	IgG	IgG
DD10	0.37334	0.35282	0.36553	0.35361	0.31437	0.29379	0.01031	0.00922	0.011
DD14	0.219295	0.25793	0.3065	0.13057	0.20342	0.25154
DD18	0.1814	0.14468	0.21507	0.19004	0.201744	0.288106
DD22	0.21497	0.22581	0.30018	0.10441	0.15271	0.20008
