# Supplementary material for: The nutrient-sensing GCN2 signaling pathway is essential for circadian clock function by regulating histone acetylation under amino acid starvation
Source: eLife journal article supplement (doi:10.7554/elife.85241), 2023-04-21
Supplement: fig3-data4 [file elife-85241-fig3-data4-v2.zip]

## Sheet: H3ac-ChIP-WT VS cpc-1KO(3mM 3AT
Hrs in DD	WT	WT	WT	cpc-1KO	cpc-1KO	cpc-1KO
DD10	0.751103	0.925603	0.902404	0.23574	0.24146	0.180138
DD14	0.739301	0.651759	0.674636	0.198381	0.315712	0.270498
DD18	1.59434	1.81382	1.80652	0.506452	0.134094	0.246066
DD22	1.32452	1.36697	1.1163	0.216758	0.310692	0.242324
