# Supplementary material for: The nutrient-sensing GCN2 signaling pathway is essential for circadian clock function by regulating histone acetylation under amino acid starvation
Source: eLife journal article supplement (doi:10.7554/elife.85241), 2023-04-21
Supplement: fig4-data1 [file Figure 4-source data 1.xlsx]

## Sheet: CPC1-ChIP
Hrs in DD	WT	WT	WT	cpc-1KO	cpc-1KO	cpc-1KO
DD10	0.043527	0.062989	0.042217	0.029656	0.031871	0.029924
DD14	0.110719	0.108443	0.089514	0.042137	0.033138	0.031079
DD18	0.109085	0.120739	0.113263	0.035526	0.042454	0.050395
DD22	0.080875	0.087984	0.086133	0.040552	0.032641	0.029164
