# Supplementary material for: The nutrient-sensing GCN2 signaling pathway is essential for circadian clock function by regulating histone acetylation under amino acid starvation
Source: eLife journal article supplement (doi:10.7554/elife.85241), 2023-04-21
Supplement: fig4-data4 [file Figure 4-source data 4.xlsx]

## Sheet: Myc-ChIP
Hrs in DD	WT	WT	WT	cpc-1KO	cpc-1KO	cpc-1KO	IgG
DD10	1.277	1.231	1.271	1.109	1.438	1.58928	1
DD14	1.865	1.712	2.111	1.237	1.084	1.293
DD18	2.684	1.93	2.615	1.524	1.41	0.77
DD22	1.337	1.409	1.601	1.136	1.224	0.881
