# Supplementary material for: The nutrient-sensing GCN2 signaling pathway is essential for circadian clock function by regulating histone acetylation under amino acid starvation
Source: eLife journal article supplement (doi:10.7554/elife.85241), 2023-04-21
Supplement: fig4-figsupp1-data1 [file Figure 4-figure supplement 1-source data 1.xlsx]

## Sheet: CPC-1-ChIP-WT+3mM 3-AT
WT	DD10	DD14	DD18	DD22		cpc-1KO
	0.0822444	0.128563	0.145845	0.13866			0.031079
	0.0943082	0.147644	0.144087	0.115849			0.0331384
	0.0938767	0.137269	0.156608	0.141675			0.0395205
