# Supplementary material for: The nutrient-sensing GCN2 signaling pathway is essential for circadian clock function by regulating histone acetylation under amino acid starvation
Source: eLife journal article supplement (doi:10.7554/elife.85241), 2023-04-21
Supplement: fig5-data1 [file Figure 5-source data 1.xlsx]

## Sheet: WT-normalized data
LumiCycle: WT-FRQ-luc (Baseline subtracted)
Time (hr:min)	Time (days)	counts/sec
12:40:00	1.04861	-48.791
12:50:00	1.05556	-46.492
13:00:00	1.0625	-66.174
13:10:00	1.06944	-74.456
13:20:00	1.07639	-80.452
13:30:00	1.08333	-81.741
13:40:00	1.09028	-82.994
13:50:00	1.09722	-101.937
14:00:00	1.10417	-98.34
14:10:00	1.11111	-113.056
14:20:00	1.11806	-107.148
14:30:00	1.125	-116.12
14:40:00	1.13194	-120.989
14:50:00	1.13889	-114.901
15:00:00	1.14583	-126.55
15:10:00	1.15278	-124.879
15:20:00	1.15972	-129.951
15:30:00	1.16667	-129.359
15:40:00	1.17361	-128.778
15:50:00	1.18056	-127.991
16:00:00	1.1875	-127.314
16:10:00	1.19444	-126.258
16:20:00	1.20139	-130.337
16:30:00	1.20833	-124.232
16:40:00	1.21528	-125.015
16:50:00	1.22222	-119.178
17:00:00	1.22917	-121.588
17:10:00	1.23611	-127.702
17:20:00	1.24306	-110.217
17:30:00	1.25	-115.909
17:40:00	1.25694	-104.502
17:50:00	1.26389	-107.444
18:00:00	1.27083	-100.467
18:10:00	1.27778	-96.17
18:20:00	1.28472	-93.946
18:30:00	1.29167	-90.535
18:40:00	1.29861	-89.495
18:50:00	1.30556	-78.721
19:00:00	1.3125	-76
19:10:00	1.31944	-66.005
19:20:00	1.32639	-64.637
19:30:00	1.33333	-61.051
19:40:00	1.34028	-54.263
19:50:00	1.34722	-46.032
20:00:00	1.35417	-42.986
20:10:00	1.36111	-34.234
20:20:00	1.36806	-36.931
20:30:00	1.375	-22.01
20:40:00	1.38194	-16.098
20:50:00	1.38889	-15.131
21:00:00	1.39583	-6.769
21:10:00	1.40278	0.03
21:20:00	1.40972	6.439
21:30:00	1.41667	12.772
21:40:00	1.42361	13.758
21:50:00	1.43056	30.75
22:00:00	1.4375	37.605
22:10:00	1.44444	41.805
22:20:00	1.45139	49.632
22:30:00	1.45833	55.763
22:40:00	1.46528	57.308
22:50:00	1.47222	70.76
23:00:00	1.47917	78.562
23:10:00	1.48611	83.064
23:20:00	1.49306	84.38
23:30:00	1.5	90.625
23:40:00	1.50694	96.394
23:50:00	1.51389	99.217
00:00:00	1.52083	110.744
00:10:00	1.52778	106.301
00:20:00	1.53472	111.576
00:30:00	1.54167	123.32
00:40:00	1.54861	118.45
00:50:00	1.55556	119.338
01:00:00	1.5625	123.605
01:10:00	1.56944	136.294
01:20:00	1.57639	123.144
01:30:00	1.58333	136.967
01:40:00	1.59028	135.625
01:50:00	1.59722	135.649
02:00:00	1.60417	135.103
02:10:00	1.61111	131.991
02:20:00	1.61806	129.517
02:30:00	1.625	125.903
02:40:00	1.63194	130.417
02:50:00	1.63889	127.401
03:00:00	1.64583	124.98
03:10:00	1.65278	128.366
03:20:00	1.65972	128.793
03:30:00	1.66667	121.078
03:40:00	1.67361	126.697
03:50:00	1.68056	116.202
04:00:00	1.6875	109.068
04:10:00	1.69444	106.181
04:20:00	1.70139	96.548
04:30:00	1.70833	98.17
04:40:00	1.71528	93.256
04:50:00	1.72222	87.336
05:00:00	1.72917	83.923
05:10:00	1.73611	81.151
05:20:00	1.74306	75.655
05:30:00	1.75	78.566
05:40:00	1.75694	58.372
05:50:00	1.76389	59.872
06:00:00	1.77083	61.289
06:10:00	1.77778	56.568
06:20:00	1.78472	42.681
06:30:00	1.79167	40.927
06:40:00	1.79861	25.445
06:50:00	1.80556	27.153
07:00:00	1.8125	18.982
07:10:00	1.81944	18.993
07:20:00	1.82639	8.24
07:30:00	1.83333	7.746
07:40:00	1.84028	-2.65
07:50:00	1.84722	-7.211
08:00:00	1.85417	-4.795
08:10:00	1.86111	-17.804
08:20:00	1.86806	-20.656
08:30:00	1.875	-14.916
08:40:00	1.88194	-27.094
08:50:00	1.88889	-31.709
09:00:00	1.89583	-33.319
09:10:00	1.90278	-35.241
09:20:00	1.90972	-38.251
09:30:00	1.91667	-44.284
09:40:00	1.92361	-47.978
09:50:00	1.93056	-49.466
10:00:00	1.9375	-61.955
10:10:00	1.94444	-62.487
10:20:00	1.95139	-60.642
10:30:00	1.95833	-68.056
10:40:00	1.96528	-66.858
10:50:00	1.97222	-61.472
11:00:00	1.97917	-72.058
11:10:00	1.98611	-70.622
11:20:00	1.99306	-71.828
11:30:00	2	-72.149
11:40:00	2.00694	-77.241
11:50:00	2.01389	-75.126
12:00:00	2.02083	-73.486
12:10:00	2.02778	-76.034
12:20:00	2.03472	-80.056
12:30:00	2.04167	-83.478
12:40:00	2.04861	-78.996
12:50:00	2.05556	-77.631
13:00:00	2.0625	-72.536
13:10:00	2.06944	-71.404
13:20:00	2.07639	-76.912
13:30:00	2.08333	-68.443
13:40:00	2.09028	-68.193
13:50:00	2.09722	-68.359
14:00:00	2.10417	-61.747
14:10:00	2.11111	-60.8
14:20:00	2.11806	-54.993
14:30:00	2.125	-50.079
14:40:00	2.13194	-56.484
14:50:00	2.13889	-51.42
15:00:00	2.14583	-39.168
15:10:00	2.15278	-40.576
15:20:00	2.15972	-30.315
15:30:00	2.16667	-30.154
15:40:00	2.17361	-29.835
15:50:00	2.18056	-31.969
16:00:00	2.1875	-20.593
16:10:00	2.19444	-22.436
16:20:00	2.20139	-9.61
16:30:00	2.20833	-9.347
16:40:00	2.21528	-13.522
16:50:00	2.22222	-5.977
17:00:00	2.22917	6.526
17:10:00	2.23611	10.022
17:20:00	2.24306	16.976
17:30:00	2.25	24.691
17:40:00	2.25694	17.032
17:50:00	2.26389	19.743
18:00:00	2.27083	25.294
18:10:00	2.27778	24.252
18:20:00	2.28472	40.4
18:30:00	2.29167	41.679
18:40:00	2.29861	41.996
18:50:00	2.30556	40.869
19:00:00	2.3125	49.863
19:10:00	2.31944	49.406
19:20:00	2.32639	50.91
19:30:00	2.33333	50.633
19:40:00	2.34028	51.887
19:50:00	2.34722	56.303
20:00:00	2.35417	62.247
20:10:00	2.36111	59.637
20:20:00	2.36806	62.305
20:30:00	2.375	63.239
20:40:00	2.38194	65.818
20:50:00	2.38889	75.817
21:00:00	2.39583	65.825
21:10:00	2.40278	71.444
21:20:00	2.40972	68.6
21:30:00	2.41667	67.544
21:40:00	2.42361	76.779
21:50:00	2.43056	79.193
22:00:00	2.4375	83.595
22:10:00	2.44444	69.183
22:20:00	2.45139	80.788
22:30:00	2.45833	72.136
22:40:00	2.46528	87.07
22:50:00	2.47222	74.449
23:00:00	2.47917	89.622
23:10:00	2.48611	84.929
23:20:00	2.49306	83.258
23:30:00	2.5	77.134
23:40:00	2.50694	78.74
23:50:00	2.51389	74.765
00:00:00	2.52083	73.558
00:10:00	2.52778	64.965
00:20:00	2.53472	72.744
00:30:00	2.54167	65.463
00:40:00	2.54861	66.239
00:50:00	2.55556	62.457
01:00:00	2.5625	52.488
01:10:00	2.56944	54.932
01:20:00	2.57639	54.707
01:30:00	2.58333	58.873
01:40:00	2.59028	51.377
01:50:00	2.59722	48.452
02:00:00	2.60417	45.097
02:10:00	2.61111	41.398
02:20:00	2.61806	38.398
02:30:00	2.625	36.632
02:40:00	2.63194	31.9
02:50:00	2.63889	27.526
03:00:00	2.64583	21.32
03:10:00	2.65278	26.561
03:20:00	2.65972	14.889
03:30:00	2.66667	12.273
03:40:00	2.67361	13.334
03:50:00	2.68056	7.016
04:00:00	2.6875	6.682
04:10:00	2.69444	2.012
04:20:00	2.70139	-0.836
04:30:00	2.70833	-5.878
04:40:00	2.71528	-8.569
04:50:00	2.72222	-9.647
05:00:00	2.72917	-10.122
05:10:00	2.73611	-27.37
05:20:00	2.74306	-19.324
05:30:00	2.75	-17.663
05:40:00	2.75694	-24.996
05:50:00	2.76389	-30.558
06:00:00	2.77083	-27.966
06:10:00	2.77778	-32.088
06:20:00	2.78472	-37.028
06:30:00	2.79167	-35.812
06:40:00	2.79861	-37.391
06:50:00	2.80556	-42.971
07:00:00	2.8125	-36.477
07:10:00	2.81944	-45.041
07:20:00	2.82639	-53.75
07:30:00	2.83333	-47.957
07:40:00	2.84028	-45.217
07:50:00	2.84722	-50.935
08:00:00	2.85417	-47.501
08:10:00	2.86111	-50.987
08:20:00	2.86806	-47.216
08:30:00	2.875	-47.815
08:40:00	2.88194	-62.988
08:50:00	2.88889	-57.008
09:00:00	2.89583	-59.751
09:10:00	2.90278	-64.387
09:20:00	2.90972	-62.459
09:30:00	2.91667	-60.163
09:40:00	2.92361	-59.079
09:50:00	2.93056	-59.51
10:00:00	2.9375	-57.999
10:10:00	2.94444	-65.668
10:20:00	2.95139	-66.927
10:30:00	2.95833	-59.041
10:40:00	2.96528	-66.685
10:50:00	2.97222	-62.092
11:00:00	2.97917	-61.31
11:10:00	2.98611	-58.566
11:20:00	2.99306	-59.818
11:30:00	3	-64.488
11:40:00	3.00694	-63.644
11:50:00	3.01389	-63.204
12:00:00	3.02083	-58.731
12:10:00	3.02778	-61.427
12:20:00	3.03472	-60.694
12:30:00	3.04167	-52.877
12:40:00	3.04861	-52.927
12:50:00	3.05556	-60.361
13:00:00	3.0625	-57.341
13:10:00	3.06944	-60.619
13:20:00	3.07639	-54.492
13:30:00	3.08333	-41.763
13:40:00	3.09028	-48.577
13:50:00	3.09722	-45.341
14:00:00	3.10417	-43.706
14:10:00	3.11111	-41.406
14:20:00	3.11806	-38.745
14:30:00	3.125	-39.853
14:40:00	3.13194	-37.11
14:50:00	3.13889	-33.619
15:00:00	3.14583	-36.318
15:10:00	3.15278	-30.119
15:20:00	3.15972	-31.133
15:30:00	3.16667	-29.485
15:40:00	3.17361	-27.824
15:50:00	3.18056	-20.143
16:00:00	3.1875	-18.711
16:10:00	3.19444	-17.275
16:20:00	3.20139	-7.892
16:30:00	3.20833	-8.804
16:40:00	3.21528	-15.676
16:50:00	3.22222	1.011
17:00:00	3.22917	2.401
17:10:00	3.23611	2.34
17:20:00	3.24306	5.816
17:30:00	3.25	18.396
17:40:00	3.25694	18.886
17:50:00	3.26389	14.889
18:00:00	3.27083	19.759
18:10:00	3.27778	22.394
18:20:00	3.28472	34.957
18:30:00	3.29167	28.057
18:40:00	3.29861	37.055
18:50:00	3.30556	44.883
19:00:00	3.3125	45.894
19:10:00	3.31944	42.711
19:20:00	3.32639	44.284
19:30:00	3.33333	44.236
19:40:00	3.34028	54.585
19:50:00	3.34722	58.277
20:00:00	3.35417	57.249
20:10:00	3.36111	66.33
20:20:00	3.36806	61.067
20:30:00	3.375	72.388
20:40:00	3.38194	71.412
20:50:00	3.38889	81.656
21:00:00	3.39583	73.827
21:10:00	3.40278	79.085
21:20:00	3.40972	71.962
21:30:00	3.41667	83.183
21:40:00	3.42361	81.018
21:50:00	3.43056	88.589
22:00:00	3.4375	85.442
22:10:00	3.44444	79.431
22:20:00	3.45139	85.754
22:30:00	3.45833	89.684
22:40:00	3.46528	89.814
22:50:00	3.47222	87.838
23:00:00	3.47917	93.295
23:10:00	3.48611	91.254
23:20:00	3.49306	91.248
23:30:00	3.5	91.153
23:40:00	3.50694	92.041
23:50:00	3.51389	89.902
00:00:00	3.52083	97.237
00:10:00	3.52778	97.686
00:20:00	3.53472	97.449
00:30:00	3.54167	93.776
00:40:00	3.54861	93.508
00:50:00	3.55556	92.432
01:00:00	3.5625	92.638
01:10:00	3.56944	93.424
01:20:00	3.57639	86.354
01:30:00	3.58333	87.992
01:40:00	3.59028	89.116
01:50:00	3.59722	80.235
02:00:00	3.60417	69.012
02:10:00	3.61111	71.862
02:20:00	3.61806	72.041
02:30:00	3.625	72.898
02:40:00	3.63194	75.39
02:50:00	3.63889	70.921
03:00:00	3.64583	73.1
03:10:00	3.65278	61.454
03:20:00	3.65972	64.82
03:30:00	3.66667	53.851
03:40:00	3.67361	62.951
03:50:00	3.68056	56.407
04:00:00	3.6875	46.871
04:10:00	3.69444	52.544
04:20:00	3.70139	48.916
04:30:00	3.70833	40.189
04:40:00	3.71528	44.811
04:50:00	3.72222	30.656
05:00:00	3.72917	38.646
05:10:00	3.73611	36.618
05:20:00	3.74306	29.959
05:30:00	3.75	20.034
05:40:00	3.75694	18.089
05:50:00	3.76389	19.828
06:00:00	3.77083	17.515
06:10:00	3.77778	23.988
06:20:00	3.78472	11.856
06:30:00	3.79167	10.506
06:40:00	3.79861	9.052
06:50:00	3.80556	2.64
07:00:00	3.8125	0.506
07:10:00	3.81944	-4.674
07:20:00	3.82639	1.13
07:30:00	3.83333	-11.519
07:40:00	3.84028	-15.545
07:50:00	3.84722	-14.353
08:00:00	3.85417	-13.679
08:10:00	3.86111	-20.259
08:20:00	3.86806	-11.662
08:30:00	3.875	-18.037
08:40:00	3.88194	-22.291
08:50:00	3.88889	-25.329
09:00:00	3.89583	-28.04
09:10:00	3.90278	-30.208
09:20:00	3.90972	-21.9
09:30:00	3.91667	-31.642
09:40:00	3.92361	-32.215
09:50:00	3.93056	-35.45
10:00:00	3.9375	-38.483
10:10:00	3.94444	-28.552
10:20:00	3.95139	-42.708
10:30:00	3.95833	-41.448
10:40:00	3.96528	-34.133
10:50:00	3.97222	-49.987
11:00:00	3.97917	-41.277
11:10:00	3.98611	-46.167
11:20:00	3.99306	-51.953
11:30:00	4	-38.219
11:40:00	4.00694	-50.468
11:50:00	4.01389	-38.713
12:00:00	4.02083	-53.433
12:10:00	4.02778	-49.971
12:20:00	4.03472	-50.684
12:30:00	4.04167	-51.601
12:40:00	4.04861	-49.339
12:50:00	4.05556	-47.128
13:00:00	4.0625	-50.368
13:10:00	4.06944	-44.178
13:20:00	4.07639	-51.891
13:30:00	4.08333	-62.253
13:40:00	4.09028	-46.252
13:50:00	4.09722	-46.208
14:00:00	4.10417	-49.028
14:10:00	4.11111	-56.002
14:20:00	4.11806	-55.155
14:30:00	4.125	-45.361
14:40:00	4.13194	-50.405
14:50:00	4.13889	-50.566
15:00:00	4.14583	-56.683
15:10:00	4.15278	-50.758
15:20:00	4.15972	-38.809
15:30:00	4.16667	-45.737
15:40:00	4.17361	-44.918
15:50:00	4.18056	-40.067
16:00:00	4.1875	-45.528
16:10:00	4.19444	-44.56
16:20:00	4.20139	-34.485
16:30:00	4.20833	-38.952
16:40:00	4.21528	-31.664
16:50:00	4.22222	-37.839
17:00:00	4.22917	-26.9
17:10:00	4.23611	-26.684
17:20:00	4.24306	-20.251
17:30:00	4.25	-23.926
17:40:00	4.25694	-26.951
17:50:00	4.26389	-20.053
18:00:00	4.27083	-20.635
18:10:00	4.27778	-14.562
18:20:00	4.28472	-9.983
18:30:00	4.29167	-9.902
18:40:00	4.29861	-7.449
18:50:00	4.30556	-11.367
19:00:00	4.3125	-0.135
19:10:00	4.31944	3.89
19:20:00	4.32639	5.209
19:30:00	4.33333	-1.391
19:40:00	4.34028	3.857
19:50:00	4.34722	5.738
20:00:00	4.35417	5.535
20:10:00	4.36111	11.711
20:20:00	4.36806	16.715
20:30:00	4.375	12.275
20:40:00	4.38194	24.309
20:50:00	4.38889	21.054
21:00:00	4.39583	29.643
21:10:00	4.40278	30.803
21:20:00	4.40972	28.662
21:30:00	4.41667	29.535
21:40:00	4.42361	29.481
21:50:00	4.43056	32.787
22:00:00	4.4375	38.43
22:10:00	4.44444	33.387
22:20:00	4.45139	48.141
22:30:00	4.45833	38.807
22:40:00	4.46528	37.289
22:50:00	4.47222	48.398
23:00:00	4.47917	46.69
23:10:00	4.48611	49.943
23:20:00	4.49306	49.04
23:30:00	4.5	46.358
23:40:00	4.50694	49.329
23:50:00	4.51389	49.982
00:00:00	4.52083	50.011
00:10:00	4.52778	43.213
00:20:00	4.53472	47.38
00:30:00	4.54167	47.586
00:40:00	4.54861	53.104
00:50:00	4.55556	45.878
01:00:00	4.5625	50.777
01:10:00	4.56944	48.367
01:20:00	4.57639	45.989
01:30:00	4.58333	50.858
01:40:00	4.59028	45.596
01:50:00	4.59722	50.012
02:00:00	4.60417	46.873
02:10:00	4.61111	43.671
02:20:00	4.61806	48.013
02:30:00	4.625	48.57
02:40:00	4.63194	49.169
02:50:00	4.63889	49.266
03:00:00	4.64583	49.264
03:10:00	4.65278	46.115
03:20:00	4.65972	44.399
03:30:00	4.66667	38.402
03:40:00	4.67361	47.91
03:50:00	4.68056	31.152
04:00:00	4.6875	31.681
04:10:00	4.69444	33.233
04:20:00	4.70139	35.803
04:30:00	4.70833	28.977
04:40:00	4.71528	26.198
04:50:00	4.72222	25.508
05:00:00	4.72917	23.11
05:10:00	4.73611	24.109
05:20:00	4.74306	31.677
05:30:00	4.75	25.05
05:40:00	4.75694	28.664
05:50:00	4.76389	21.47
06:00:00	4.77083	20.287
06:10:00	4.77778	17.932
06:20:00	4.78472	22.241
06:30:00	4.79167	15.874
06:40:00	4.79861	6.693
06:50:00	4.80556	4.176
07:00:00	4.8125	5.132
07:10:00	4.81944	4.658
07:20:00	4.82639	8.048
07:30:00	4.83333	2.218
07:40:00	4.84028	-3.941
07:50:00	4.84722	-4.353
08:00:00	4.85417	-7.008
08:10:00	4.86111	-1.874
08:20:00	4.86806	-6.425
08:30:00	4.875	-12.607
08:40:00	4.88194	-7.167
08:50:00	4.88889	-14.041
09:00:00	4.89583	-11.856
09:10:00	4.90278	-18.071
09:20:00	4.90972	-11.304
09:30:00	4.91667	-17.064
09:40:00	4.92361	-15.649
09:50:00	4.93056	-14.36
10:00:00	4.9375	-15.98
10:10:00	4.94444	-21.264
10:20:00	4.95139	-21.94
10:30:00	4.95833	-23.205
10:40:00	4.96528	-26.004
10:50:00	4.97222	-22.573
11:00:00	4.97917	-16.817
11:10:00	4.98611	-27.047
11:20:00	4.99306	-23.014
11:30:00	5	-29.24
11:40:00	5.00694	-28.769
11:50:00	5.01389	-26.513
12:00:00	5.02083	-23.874
12:10:00	5.02778	-27.067
12:20:00	5.03472	-30.615
12:30:00	5.04167	-31.436
12:40:00	5.04861	-27.209
12:50:00	5.05556	-27.255
13:00:00	5.0625	-29.114
13:10:00	5.06944	-34.552
13:20:00	5.07639	-34.862
13:30:00	5.08333	-30.261
13:40:00	5.09028	-31.855
13:50:00	5.09722	-26.896
14:00:00	5.10417	-29.955
14:10:00	5.11111	-31.837
14:20:00	5.11806	-29.674
14:30:00	5.125	-26.664
14:40:00	5.13194	-30.217
14:50:00	5.13889	-29.989
15:00:00	5.14583	-34.221
15:10:00	5.15278	-20.492
15:20:00	5.15972	-26.662
15:30:00	5.16667	-28.053
15:40:00	5.17361	-32.015
15:50:00	5.18056	-28.43
16:00:00	5.1875	-26.263
16:10:00	5.19444	-26.923
16:20:00	5.20139	-20.742
16:30:00	5.20833	-26.42
16:40:00	5.21528	-23.26
16:50:00	5.22222	-25.294
17:00:00	5.22917	-22.834
17:10:00	5.23611	-20.603
17:20:00	5.24306	-25.63
17:30:00	5.25	-25.305
17:40:00	5.25694	-21.694
17:50:00	5.26389	-20.08
18:00:00	5.27083	-19.428
18:10:00	5.27778	-14.844
18:20:00	5.28472	-22.052
18:30:00	5.29167	-15.729
18:40:00	5.29861	-18.728
18:50:00	5.30556	-10.52
19:00:00	5.3125	-13.703
19:10:00	5.31944	-15.926
19:20:00	5.32639	-15.109
19:30:00	5.33333	-7.138
19:40:00	5.34028	-17.885
19:50:00	5.34722	-12.977
20:00:00	5.35417	-8.388
20:10:00	5.36111	-9.032
20:20:00	5.36806	-4.483
20:30:00	5.375	-12.427
20:40:00	5.38194	-5.995
20:50:00	5.38889	-7.184
21:00:00	5.39583	-4.335
21:10:00	5.40278	-5.429
21:20:00	5.40972	-2.281
21:30:00	5.41667	-3.76
21:40:00	5.42361	-13.22
21:50:00	5.43056	-4.573
22:00:00	5.4375	2.558
22:10:00	5.44444	-9.233
22:20:00	5.45139	-1.739
22:30:00	5.45833	-6.243
22:40:00	5.46528	-5.094
22:50:00	5.47222	-1.072
23:00:00	5.47917	1.147
23:10:00	5.48611	3.125
23:20:00	5.49306	-2.782
23:30:00	5.5	-1.65
23:40:00	5.50694	1.616
23:50:00	5.51389	3.146
00:00:00	5.52083	-3.279
00:10:00	5.52778	1.856
00:20:00	5.53472	5.111
00:30:00	5.54167	6.427
00:40:00	5.54861	-0.629
00:50:00	5.55556	-2.03
01:00:00	5.5625	7.967
01:10:00	5.56944	2.1
01:20:00	5.57639	3.131
01:30:00	5.58333	7.483
01:40:00	5.59028	6.987
01:50:00	5.59722	12.425
02:00:00	5.60417	1.842
02:10:00	5.61111	4.616
02:20:00	5.61806	11.708
02:30:00	5.625	4.699
02:40:00	5.63194	9.885
02:50:00	5.63889	8.075
03:00:00	5.64583	8.805
03:10:00	5.65278	3.513
03:20:00	5.65972	11.794
03:30:00	5.66667	7.057
03:40:00	5.67361	11.197
03:50:00	5.68056	1.703
04:00:00	5.6875	10.901
04:10:00	5.69444	8.817
04:20:00	5.70139	6.294
04:30:00	5.70833	16.643
04:40:00	5.71528	7.432
04:50:00	5.72222	11.542
05:00:00	5.72917	11.463
05:10:00	5.73611	13.008
05:20:00	5.74306	13.378
05:30:00	5.75	8.67
05:40:00	5.75694	12.188
05:50:00	5.76389	10.174
06:00:00	5.77083	5.011
06:10:00	5.77778	11.307
06:20:00	5.78472	11.728
06:30:00	5.79167	9.254
06:40:00	5.79861	10.4
06:50:00	5.80556	13.778
07:00:00	5.8125	10.718
07:10:00	5.81944	7.458
07:20:00	5.82639	6.664
07:30:00	5.83333	8.31
07:40:00	5.84028	14.63
07:50:00	5.84722	10.53
08:00:00	5.85417	5.687
08:10:00	5.86111	4.681
08:20:00	5.86806	9.981
08:30:00	5.875	6.55
08:40:00	5.88194	3.274
08:50:00	5.88889	3.624
09:00:00	5.89583	-1.096
09:10:00	5.90278	7.423
09:20:00	5.90972	6.578
09:30:00	5.91667	6.415
09:40:00	5.92361	0.438
09:50:00	5.93056	1.403
10:00:00	5.9375	2.045
10:10:00	5.94444	1.507
10:20:00	5.95139	-3.707
10:30:00	5.95833	0.1
10:40:00	5.96528	-7.084
10:50:00	5.97222	-2.667
11:00:00	5.97917	0.073
11:10:00	5.98611	-7.99
11:20:00	5.99306	-2.694
11:30:00	6	-5.196
11:40:00	6.00694	-5.391
11:50:00	6.01389	-2.377
12:00:00	6.02083	-9.953
12:10:00	6.02778	-7.942
12:20:00	6.03472	-8.338
12:30:00	6.04167	-9.732
12:40:00	6.04861	-6.3
12:50:00	6.05556	-9.518
13:00:00	6.0625	-14.014
13:10:00	6.06944	-12.719
13:20:00	6.07639	-10.456
13:30:00	6.08333	-11.244
13:40:00	6.09028	-10.66
13:50:00	6.09722	-14.64
14:00:00	6.10417	-12.27
14:10:00	6.11111	-6.773
14:20:00	6.11806	-11.531
14:30:00	6.125	-14.499
14:40:00	6.13194	-16.704
14:50:00	6.13889	-25.716
15:00:00	6.14583	-13.546
15:10:00	6.15278	-15.809
15:20:00	6.15972	-15.91
15:30:00	6.16667	-17.865
15:40:00	6.17361	-16.579
15:50:00	6.18056	-20.166
16:00:00	6.1875	-17.958
16:10:00	6.19444	-24.444
16:20:00	6.20139	-26.751
16:30:00	6.20833	-19.147
16:40:00	6.21528	-24.344
16:50:00	6.22222	-22.186
17:00:00	6.22917	-19.699
17:10:00	6.23611	-16.46
17:20:00	6.24306	-22.107
17:30:00	6.25	-21.402
17:40:00	6.25694	-18.099
17:50:00	6.26389	-22.597
18:00:00	6.27083	-16.225
18:10:00	6.27778	-22.502
18:20:00	6.28472	-22.589
18:30:00	6.29167	-24.973
18:40:00	6.29861	-18.918
18:50:00	6.30556	-23.582
19:00:00	6.3125	-20.193
19:10:00	6.31944	-16.206
19:20:00	6.32639	-16.059
19:30:00	6.33333	-20.259
19:40:00	6.34028	-13.74
19:50:00	6.34722	-19.137
20:00:00	6.35417	-11.498
20:10:00	6.36111	-17.97
20:20:00	6.36806	-9.246
20:30:00	6.375	-15.399
20:40:00	6.38194	-13.814
20:50:00	6.38889	-11.515
21:00:00	6.39583	-14.246
21:10:00	6.40278	-10.18
21:20:00	6.40972	-7.777
21:30:00	6.41667	-16.168
21:40:00	6.42361	-7.876
21:50:00	6.43056	-10.658
22:00:00	6.4375	-7.364
22:10:00	6.44444	-3.28
22:20:00	6.45139	-4.381
22:30:00	6.45833	-8.588
22:40:00	6.46528	-8.884
22:50:00	6.47222	-6.257
23:00:00	6.47917	-13.513
23:10:00	6.48611	-7.283
23:20:00	6.49306	-7.138
23:30:00	6.5	-0.852
23:40:00	6.50694	-5.648
23:50:00	6.51389	3.509
00:00:00	6.52083	0.198
00:10:00	6.52778	0.033
00:20:00	6.53472	-1.057
00:30:00	6.54167	5.073
00:40:00	6.54861	-1.31
00:50:00	6.55556	4.622
01:00:00	6.5625	1.631
01:10:00	6.56944	12.884
01:20:00	6.57639	5.251
01:30:00	6.58333	5.493
01:40:00	6.59028	3.267
01:50:00	6.59722	7.589
02:00:00	6.60417	11.111
02:10:00	6.61111	7.067
02:20:00	6.61806	8.782
02:30:00	6.625	13.721
02:40:00	6.63194	10.014
02:50:00	6.63889	6.123
03:00:00	6.64583	14.961
03:10:00	6.65278	14.7
03:20:00	6.65972	16.108
03:30:00	6.66667	12.223
03:40:00	6.67361	13.573
03:50:00	6.68056	12.721
04:00:00	6.6875	15.376
04:10:00	6.69444	15.548
04:20:00	6.70139	10.96
04:30:00	6.70833	16.06
04:40:00	6.71528	16.141
04:50:00	6.72222	15.956
05:00:00	6.72917	16.909
05:10:00	6.73611	12.99
05:20:00	6.74306	19.527
05:30:00	6.75	18.836
05:40:00	6.75694	18.296
05:50:00	6.76389	15.401
06:00:00	6.77083	16.302
06:10:00	6.77778	14.017
06:20:00	6.78472	18.297
06:30:00	6.79167	11.657
06:40:00	6.79861	14.211
06:50:00	6.80556	17.783
07:00:00	6.8125	18.521
07:10:00	6.81944	14.676
07:20:00	6.82639	16.316
07:30:00	6.83333	11.502
07:40:00	6.84028	17.825
07:50:00	6.84722	11.45
08:00:00	6.85417	10.8
08:10:00	6.86111	10.657
08:20:00	6.86806	16.273
08:30:00	6.875	11.596
08:40:00	6.88194	9.328
08:50:00	6.88889	10.717
09:00:00	6.89583	14.143
09:10:00	6.90278	16.108
09:20:00	6.90972	10.619
09:30:00	6.91667	12.736
09:40:00	6.92361	8.364
09:50:00	6.93056	3.973
10:00:00	6.9375	6.255
10:10:00	6.94444	9.039
10:20:00	6.95139	0.146
10:30:00	6.95833	5.776
10:40:00	6.96528	0.414
10:50:00	6.97222	2.607
11:00:00	6.97917	-2.929
11:10:00	6.98611	-2.021
11:20:00	6.99306	-0.444
11:30:00	7	-1.39
11:40:00	7.00694	-11.166
11:50:00	7.01389	0.559
12:00:00	7.02083	-8.972
12:10:00	7.02778	-2.715
12:20:00	7.03472	-8.981
12:30:00	7.04167	-6.847
12:40:00	7.04861	-7.661
12:50:00	7.05556	-10.916
13:00:00	7.0625	-11.642
13:10:00	7.06944	-10.474
13:20:00	7.07639	-14.234
13:30:00	7.08333	-7.901
13:40:00	7.09028	-9.473
13:50:00	7.09722	-12.39
14:00:00	7.10417	-17.082
14:10:00	7.11111	-16.588
14:20:00	7.11806	-18.226
14:30:00	7.125	-17.26
14:40:00	7.13194	-17.578
14:50:00	7.13889	-13.388
15:00:00	7.14583	-19.496
15:10:00	7.15278	-26.518

## Sheet: gcn-5KO-normalized data
LumiCycle: gcn5KO-FRQ-luc (Baseline subtracted)
Time (hr:min)	Time (days)	counts/sec
12:32:00	1.05	0.855
12:42:00	1.05694	0.114
12:52:00	1.06389	-1.683
13:02:00	1.07083	-1.633
13:12:00	1.07778	-2.67
13:22:00	1.08472	-1.778
13:32:00	1.09167	-4.299
13:42:00	1.09861	-3.984
13:52:00	1.10556	-2.744
14:02:00	1.1125	-5.857
14:12:00	1.11944	-5.524
14:22:00	1.12639	-4.902
14:32:00	1.13333	-5.069
14:42:00	1.14028	-7.39
14:52:00	1.14722	-6.015
15:02:00	1.15417	-7.821
15:12:00	1.16111	-6.856
15:22:00	1.16806	-7.309
15:32:00	1.175	-7.75
15:42:00	1.18194	-8.062
15:52:00	1.18889	-8.531
16:02:00	1.19583	-8.919
16:12:00	1.20278	-8.075
16:22:00	1.20972	-7.671
16:32:00	1.21667	-8.398
16:42:00	1.22361	-7.513
16:52:00	1.23056	-9.39
17:02:00	1.2375	-7.679
17:12:00	1.24444	-8.135
17:22:00	1.25139	-7.922
17:32:00	1.25833	-6.64
17:42:00	1.26528	-7.265
17:52:00	1.27222	-5.502
18:02:00	1.27917	-6.417
18:12:00	1.28611	-6.023
18:22:00	1.29306	-5.431
18:32:00	1.3	-6.276
18:42:00	1.30694	-6.574
18:52:00	1.31389	-4.139
19:02:00	1.32083	-5.348
19:12:00	1.32778	-4.499
19:22:00	1.33472	-4.068
19:32:00	1.34167	-4.647
19:42:00	1.34861	-3.035
19:52:00	1.35556	-3.25
20:02:00	1.3625	-2.878
20:12:00	1.36944	-1.62
20:22:00	1.37639	-2.388
20:32:00	1.38333	-0.528
20:42:00	1.39028	-0.732
20:52:00	1.39722	-1.878
21:02:00	1.40417	1.121
21:12:00	1.41111	0.289
21:22:00	1.41806	1.747
21:32:00	1.425	2.006
21:42:00	1.43194	1.449
21:52:00	1.43889	2.408
22:02:00	1.44583	3.075
22:12:00	1.45278	2.561
22:22:00	1.45972	3.477
22:32:00	1.46667	3.12
22:42:00	1.47361	3.574
22:52:00	1.48056	4.138
23:02:00	1.4875	4.549
23:12:00	1.49444	5.086
23:22:00	1.50139	4.833
23:32:00	1.50833	5.28
23:42:00	1.51528	6.767
23:52:00	1.52222	5.382
00:02:00	1.52917	6.297
00:12:00	1.53611	6.385
00:22:00	1.54306	5.865
00:32:00	1.55	7.106
00:42:00	1.55694	6.927
00:52:00	1.56389	8.388
01:02:00	1.57083	8.576
01:12:00	1.57778	8.314
01:22:00	1.58472	8.942
01:32:00	1.59167	6.556
01:42:00	1.59861	8.408
01:52:00	1.60556	6.937
02:02:00	1.6125	8.919
02:12:00	1.61944	6.882
02:22:00	1.62639	9.031
02:32:00	1.63333	8.645
02:42:00	1.64028	8.918
02:52:00	1.64722	7.765
03:02:00	1.65417	7.74
03:12:00	1.66111	8.333
03:22:00	1.66806	8.09
03:32:00	1.675	6.992
03:42:00	1.68194	8.632
03:52:00	1.68889	7.686
04:02:00	1.69583	8.063
04:12:00	1.70278	7.784
04:22:00	1.70972	7.32
04:32:00	1.71667	8.116
04:42:00	1.72361	5.609
04:52:00	1.73056	5.761
05:02:00	1.7375	6.286
05:12:00	1.74444	6.267
05:22:00	1.75139	4.425
05:32:00	1.75833	4.406
05:42:00	1.76528	5.37
05:52:00	1.77222	4.677
06:02:00	1.77917	5.711
06:12:00	1.78611	5.077
06:22:00	1.79306	3.922
06:32:00	1.8	5.771
06:42:00	1.80694	3.142
06:52:00	1.81389	4.324
07:02:00	1.82083	4.652
07:12:00	1.82778	3.617
07:22:00	1.83472	2.16
07:32:00	1.84167	3.002
07:42:00	1.84861	2.349
07:52:00	1.85556	1.484
08:02:00	1.8625	2.668
08:12:00	1.86944	1.624
08:22:00	1.87639	1.891
08:32:00	1.88333	2.433
08:42:00	1.89028	1.408
08:52:00	1.89722	1.779
09:02:00	1.90417	0.426
09:12:00	1.91111	-0.335
09:22:00	1.91806	-0.485
09:32:00	1.925	-0.038
09:42:00	1.93194	-0.023
09:52:00	1.93889	1.137
10:02:00	1.94583	-0.393
10:12:00	1.95278	-0.532
10:22:00	1.95972	-1.237
10:32:00	1.96667	0.35
10:42:00	1.97361	-0.502
10:52:00	1.98056	-0.826
11:02:00	1.9875	-0.439
11:12:00	1.99444	-1.716
11:22:00	2.00139	-1.181
11:32:00	2.00833	0.317
11:42:00	2.01528	-1.209
11:52:00	2.02222	-0.14
12:02:00	2.02917	-2.273
12:12:00	2.03611	-3.101
12:22:00	2.04306	-1.357
12:32:00	2.05	-3.162
12:42:00	2.05694	-0.955
12:52:00	2.06389	-2.68
13:02:00	2.07083	-1.931
13:12:00	2.07778	-1.475
13:22:00	2.08472	-1.722
13:32:00	2.09167	-0.923
13:42:00	2.09861	-1.231
13:52:00	2.10556	-2.657
14:02:00	2.1125	-2.271
14:12:00	2.11944	-2.249
14:22:00	2.12639	-1.628
14:32:00	2.13333	-2.366
14:42:00	2.14028	-1.145
14:52:00	2.14722	-1.565
15:02:00	2.15417	-2.825
15:12:00	2.16111	-2.784
15:22:00	2.16806	-1.132
15:32:00	2.175	-1.577
15:42:00	2.18194	-3.327
15:52:00	2.18889	-3.564
16:02:00	2.19583	-1.822
16:12:00	2.20278	-1.743
16:22:00	2.20972	-3.289
16:32:00	2.21667	-1.335
16:42:00	2.22361	-2.031
16:52:00	2.23056	-2.932
17:02:00	2.2375	-2.116
17:12:00	2.24444	-2.201
17:22:00	2.25139	-3.325
17:32:00	2.25833	-2.275
17:42:00	2.26528	-2.451
17:52:00	2.27222	-3.116
18:02:00	2.27917	-1.798
18:12:00	2.28611	-3.074
18:22:00	2.29306	-1.827
18:32:00	2.3	-2.034
18:42:00	2.30694	-2.319
18:52:00	2.31389	-1.971
19:02:00	2.32083	-1.952
19:12:00	2.32778	-1.77
19:22:00	2.33472	-2.421
19:32:00	2.34167	-1.753
19:42:00	2.34861	-2.209
19:52:00	2.35556	-2.148
20:02:00	2.3625	-2.477
20:12:00	2.36944	-1.7
20:22:00	2.37639	-2.314
20:32:00	2.38333	-0.869
20:42:00	2.39028	-2.676
20:52:00	2.39722	-1.908
21:02:00	2.40417	-0.95
21:12:00	2.41111	-0.956
21:22:00	2.41806	-1.107
21:32:00	2.425	-1.343
21:42:00	2.43194	-1.259
21:52:00	2.43889	-2.115
22:02:00	2.44583	-1.775
22:12:00	2.45278	-1.172
22:22:00	2.45972	-0.915
22:32:00	2.46667	-0.488
22:42:00	2.47361	-0.882
22:52:00	2.48056	-0.986
23:02:00	2.4875	-0.877
23:12:00	2.49444	-0.327
23:22:00	2.50139	-2.225
23:32:00	2.50833	-1.227
23:42:00	2.51528	0.326
23:52:00	2.52222	0.123
00:02:00	2.52917	-0.714
00:12:00	2.53611	-0.069
00:22:00	2.54306	-1.053
00:32:00	2.55	0.577
00:42:00	2.55694	-1.129
00:52:00	2.56389	-1.109
01:02:00	2.57083	-1.432
01:12:00	2.57778	0.134
01:22:00	2.58472	-0.07
01:32:00	2.59167	-0.057
01:42:00	2.59861	0.331
01:52:00	2.60556	0.608
02:02:00	2.6125	-0.659
02:12:00	2.61944	-0.534
02:22:00	2.62639	-1.901
02:32:00	2.63333	0.081
02:42:00	2.64028	-0.495
02:52:00	2.64722	-1.284
03:02:00	2.65417	0.246
03:12:00	2.66111	-0.413
03:22:00	2.66806	-1.39
03:32:00	2.675	-0.894
03:42:00	2.68194	-1.102
03:52:00	2.68889	-1.225
04:02:00	2.69583	-0.618
04:12:00	2.70278	-0.594
04:22:00	2.70972	-0.004
04:32:00	2.71667	0.217
04:42:00	2.72361	0.071
04:52:00	2.73056	-0.168
05:02:00	2.7375	-1.117
05:12:00	2.74444	-0.897
05:22:00	2.75139	-0.826
05:32:00	2.75833	-0.878
05:42:00	2.76528	-0.51
05:52:00	2.77222	-2.155
06:02:00	2.77917	-0.382
06:12:00	2.78611	-0.49
06:22:00	2.79306	-0.352
06:32:00	2.8	-0.621
06:42:00	2.80694	-0.262
06:52:00	2.81389	-0.656
07:02:00	2.82083	-0.053
07:12:00	2.82778	-0.67
07:22:00	2.83472	-0.778
07:32:00	2.84167	-1.293
07:42:00	2.84861	-1.735
07:52:00	2.85556	-0.587
08:02:00	2.8625	-1.638
08:12:00	2.86944	0.508
08:22:00	2.87639	-1.072
08:32:00	2.88333	-0.393
08:42:00	2.89028	-0.599
08:52:00	2.89722	-0.307
09:02:00	2.90417	-1.808
09:12:00	2.91111	-1.058
09:22:00	2.91806	-0.466
09:32:00	2.925	-1.716
09:42:00	2.93194	-1.215
09:52:00	2.93889	-1.065
10:02:00	2.94583	-0.728
10:12:00	2.95278	0.015
10:22:00	2.95972	-1.257
10:32:00	2.96667	-0.513
10:42:00	2.97361	-0.5
10:52:00	2.98056	-0.095
11:02:00	2.9875	-0.711
11:12:00	2.99444	-0.124
11:22:00	3.00139	-0.491
11:32:00	3.00833	-0.746
11:42:00	3.01528	-1.103
11:52:00	3.02222	0.113
12:02:00	3.02917	-1.073
12:12:00	3.03611	-0.115
12:22:00	3.04306	-0.737
12:32:00	3.05	-0.487
12:42:00	3.05694	-0.742
12:52:00	3.06389	-1.382
13:02:00	3.07083	-0.841
13:12:00	3.07778	-0.162
13:22:00	3.08472	0.432
13:32:00	3.09167	-0.234
13:42:00	3.09861	0.071
13:52:00	3.10556	-1.234
14:02:00	3.1125	-1.342
14:12:00	3.11944	-0.229
14:22:00	3.12639	0.055
14:32:00	3.13333	-0.354
14:42:00	3.14028	0.609
14:52:00	3.14722	0.897
15:02:00	3.15417	0.533
15:12:00	3.16111	-0.241
15:22:00	3.16806	-1.065
15:32:00	3.175	-0.656
15:42:00	3.18194	-0.141
15:52:00	3.18889	0.1
16:02:00	3.19583	-0.732
16:12:00	3.20278	-0.604
16:22:00	3.20972	-0.554
16:32:00	3.21667	-0.371
16:42:00	3.22361	-0.499
16:52:00	3.23056	0.744
17:02:00	3.2375	-1.612
17:12:00	3.24444	0.172
17:22:00	3.25139	-0.221
17:32:00	3.25833	-0.142
17:42:00	3.26528	0.061
17:52:00	3.27222	-0.295
18:02:00	3.27917	-0.059
18:12:00	3.28611	-1.066
18:22:00	3.29306	0.282
18:32:00	3.3	0.285
18:42:00	3.30694	-0.712
18:52:00	3.31389	-1.285
19:02:00	3.32083	-0.302
19:12:00	3.32778	-0.292
19:22:00	3.33472	-0.764
19:32:00	3.34167	-0.364
19:42:00	3.34861	-0.339
19:52:00	3.35556	-0.216
20:02:00	3.3625	-1.225
20:12:00	3.36944	-0.889
20:22:00	3.37639	-1.117
20:32:00	3.38333	-0.878
20:42:00	3.39028	-0.487
20:52:00	3.39722	-0.727
21:02:00	3.40417	-0.752
21:12:00	3.41111	0.259
21:22:00	3.41806	-1.286
21:32:00	3.425	-0.513
21:42:00	3.43194	-0.817
21:52:00	3.43889	-0.205
22:02:00	3.44583	-0.185
22:12:00	3.45278	-1.432
22:22:00	3.45972	-0.879
22:32:00	3.46667	-0.767
22:42:00	3.47361	-0.11
22:52:00	3.48056	-0.902
23:02:00	3.4875	-0.529
23:12:00	3.49444	-0.522
23:22:00	3.50139	0.608
23:32:00	3.50833	-0.149
23:42:00	3.51528	-0.62
23:52:00	3.52222	0.199
00:02:00	3.52917	0.265
00:12:00	3.53611	-0.529
00:22:00	3.54306	-0.804
00:32:00	3.55	-0.18
00:42:00	3.55694	0.086
00:52:00	3.56389	-0.51
01:02:00	3.57083	-0.577
01:12:00	3.57778	-0.621
01:22:00	3.58472	-0.055
01:32:00	3.59167	-0.121
01:42:00	3.59861	0.281
01:52:00	3.60556	1.778
02:02:00	3.6125	0.564
02:12:00	3.61944	0.93
02:22:00	3.62639	-0.399
02:32:00	3.63333	-0.74
02:42:00	3.64028	-0.126
02:52:00	3.64722	-0.063
03:02:00	3.65417	-0.162
03:12:00	3.66111	-1.201
03:22:00	3.66806	-0.486
03:32:00	3.675	0.787
03:42:00	3.68194	0.131
03:52:00	3.68889	-0.121
04:02:00	3.69583	0.441
04:12:00	3.70278	0.248
04:22:00	3.70972	-0.122
04:32:00	3.71667	-0.5
04:42:00	3.72361	1.038
04:52:00	3.73056	-0.647
05:02:00	3.7375	0.592
05:12:00	3.74444	-1.429
05:22:00	3.75139	0.454
05:32:00	3.75833	0.172
05:42:00	3.76528	0.147
05:52:00	3.77222	-0.213
06:02:00	3.77917	-0.161
06:12:00	3.78611	-0.443
06:22:00	3.79306	-0.375
06:32:00	3.8	-0.206
06:42:00	3.80694	0.94
06:52:00	3.81389	0.15
07:02:00	3.82083	0.737
07:12:00	3.82778	1.049
07:22:00	3.83472	-0.271
07:32:00	3.84167	-0.33
07:42:00	3.84861	-1.027
07:52:00	3.85556	0.157
08:02:00	3.8625	-0.211
08:12:00	3.86944	0.594
08:22:00	3.87639	-1.443
08:32:00	3.88333	-0.489
08:42:00	3.89028	0.429
08:52:00	3.89722	-0.951
09:02:00	3.90417	0.037
09:12:00	3.91111	-0.437
09:22:00	3.91806	-0.163
09:32:00	3.925	-0.938
09:42:00	3.93194	-1.338
09:52:00	3.93889	-0.827
10:02:00	3.94583	0.21
10:12:00	3.95278	0.662
10:22:00	3.95972	-0.602
10:32:00	3.96667	0.707
10:42:00	3.97361	0.03
10:52:00	3.98056	0.081
11:02:00	3.9875	-0.796
11:12:00	3.99444	-0.42
11:22:00	4.00139	-0.281
11:32:00	4.00833	-0.893
11:42:00	4.01528	-0.185
11:52:00	4.02222	0.894
12:02:00	4.02917	0.068
12:12:00	4.03611	-0.254
12:22:00	4.04306	-0.425
12:32:00	4.05	1.141
12:42:00	4.05694	-0.552
12:52:00	4.06389	-1.556
13:02:00	4.07083	-0.059
13:12:00	4.07778	-0.951
13:22:00	4.08472	0.257
13:32:00	4.09167	-0.548
13:42:00	4.09861	-0.466
13:52:00	4.10556	-0.999
14:02:00	4.1125	-0.331
14:12:00	4.11944	-0.38
14:22:00	4.12639	0.748
14:32:00	4.13333	-0.019
14:42:00	4.14028	-0.682
14:52:00	4.14722	-0.803
15:02:00	4.15417	-0.709
15:12:00	4.16111	-0.324
15:22:00	4.16806	0.387
15:32:00	4.175	0.9
15:42:00	4.18194	-0.333
15:52:00	4.18889	0.763
16:02:00	4.19583	-1.256
16:12:00	4.20278	0.212
16:22:00	4.20972	1.094
16:32:00	4.21667	0.755
16:42:00	4.22361	-0.576
16:52:00	4.23056	-0.346
17:02:00	4.2375	-0.225
17:12:00	4.24444	-0.038
17:22:00	4.25139	0.76
17:32:00	4.25833	-0.541
17:42:00	4.26528	1.225
17:52:00	4.27222	-0.705
18:02:00	4.27917	-1.589
18:12:00	4.28611	0.993
18:22:00	4.29306	1.33
18:32:00	4.3	-0.326
18:42:00	4.30694	-0.518
18:52:00	4.31389	0.428
19:02:00	4.32083	0.594
19:12:00	4.32778	0.461
19:22:00	4.33472	-0.848
19:32:00	4.34167	0.723
19:42:00	4.34861	0.585
19:52:00	4.35556	0.546
20:02:00	4.3625	0.447
20:12:00	4.36944	0.179
20:22:00	4.37639	0.542
20:32:00	4.38333	0.034
20:42:00	4.39028	0.018
20:52:00	4.39722	-0.213
21:02:00	4.40417	-1.177
21:12:00	4.41111	0.043
21:22:00	4.41806	-0.159
21:32:00	4.425	-0.327
21:42:00	4.43194	0.74
21:52:00	4.43889	-1.145
22:02:00	4.44583	0.318
22:12:00	4.45278	0.929
22:22:00	4.45972	0.22
22:32:00	4.46667	-0.315
22:42:00	4.47361	0.692
22:52:00	4.48056	0.639
23:02:00	4.4875	-0.079
23:12:00	4.49444	0.47
23:22:00	4.50139	1.002
23:32:00	4.50833	-0.963
23:42:00	4.51528	-0.26
23:52:00	4.52222	0.746
00:02:00	4.52917	-0.331
00:12:00	4.53611	0.404
00:22:00	4.54306	0.81
00:32:00	4.55	0.772
00:42:00	4.55694	1.344
00:52:00	4.56389	0.627
01:02:00	4.57083	-0.033
01:12:00	4.57778	1.35
01:22:00	4.58472	0.165
01:32:00	4.59167	0.343
01:42:00	4.59861	1.265
01:52:00	4.60556	0.005
02:02:00	4.6125	0.605
02:12:00	4.61944	0.447
02:22:00	4.62639	-0.076
02:32:00	4.63333	0.431
02:42:00	4.64028	1.213
02:52:00	4.64722	0.93
03:02:00	4.65417	0.687
03:12:00	4.66111	-0.946
03:22:00	4.66806	-0.714
03:32:00	4.675	0.478
03:42:00	4.68194	-0.167
03:52:00	4.68889	-0.004
04:02:00	4.69583	-0.928
04:12:00	4.70278	-0.536
04:22:00	4.70972	0.868
04:32:00	4.71667	0.883
04:42:00	4.72361	1.732
04:52:00	4.73056	0.315
05:02:00	4.7375	-0.009
05:12:00	4.74444	0.349
05:22:00	4.75139	-0.305
05:32:00	4.75833	0.295
05:42:00	4.76528	-1.414
05:52:00	4.77222	0.968
06:02:00	4.77917	0.495
06:12:00	4.78611	1.07
06:22:00	4.79306	-0.151
06:32:00	4.8	-0.169
06:42:00	4.80694	-0.618
06:52:00	4.81389	0.306
07:02:00	4.82083	0.058
07:12:00	4.82778	-0.396
07:22:00	4.83472	0.141
07:32:00	4.84167	-1.225
07:42:00	4.84861	-0.227
07:52:00	4.85556	-0.717
08:02:00	4.8625	0.578
08:12:00	4.86944	-0.177
08:22:00	4.87639	0.118
08:32:00	4.88333	0.07
08:42:00	4.89028	-0.358
08:52:00	4.89722	-0.684
09:02:00	4.90417	1.626
09:12:00	4.91111	-0.969
09:22:00	4.91806	0.904
09:32:00	4.925	-0.731
09:42:00	4.93194	0.551
09:52:00	4.93889	0.283
10:02:00	4.94583	-0.778
10:12:00	4.95278	-0.619
10:22:00	4.95972	-0.426
10:32:00	4.96667	0.063
10:42:00	4.97361	-0.985
10:52:00	4.98056	0.229
11:02:00	4.9875	0.078
11:12:00	4.99444	0.714
11:22:00	5.00139	-0.425
11:32:00	5.00833	-0.709
11:42:00	5.01528	0.344
11:52:00	5.02222	0.477
12:02:00	5.02917	-0.356
12:12:00	5.03611	0.553
12:22:00	5.04306	-0.77
12:32:00	5.05	0.111
12:42:00	5.05694	1.087
12:52:00	5.06389	0.383
13:02:00	5.07083	-0.915
13:12:00	5.07778	-0.021
13:22:00	5.08472	-0.549
13:32:00	5.09167	-0.193
13:42:00	5.09861	0.417
13:52:00	5.10556	0.342
14:02:00	5.1125	0.674
14:12:00	5.11944	0.458
14:22:00	5.12639	-0.307
14:32:00	5.13333	0.986
14:42:00	5.14028	0.28
14:52:00	5.14722	-0.493
15:02:00	5.15417	1.37
15:12:00	5.16111	0.505
15:22:00	5.16806	-0.308
15:32:00	5.175	0.349
15:42:00	5.18194	0.798
15:52:00	5.18889	0.984
16:02:00	5.19583	0.32
16:12:00	5.20278	0.672
16:22:00	5.20972	0.165
16:32:00	5.21667	1.247
16:42:00	5.22361	1.978
16:52:00	5.23056	0.766
17:02:00	5.2375	0.571
17:12:00	5.24444	-1.43
17:22:00	5.25139	0.868
17:32:00	5.25833	0.435
17:42:00	5.26528	1.336
17:52:00	5.27222	0.386
18:02:00	5.27917	-0.398
18:12:00	5.28611	-0.274
18:22:00	5.29306	0.166
18:32:00	5.3	0.029
18:42:00	5.30694	1.636
18:52:00	5.31389	0.835
19:02:00	5.32083	0.685
19:12:00	5.32778	1.306
19:22:00	5.33472	0.634
19:32:00	5.34167	1.583
19:42:00	5.34861	0.779
19:52:00	5.35556	0.696
20:02:00	5.3625	1.614
20:12:00	5.36944	1.535
20:22:00	5.37639	-0.662
20:32:00	5.38333	1.396
20:42:00	5.39028	0.949
20:52:00	5.39722	-0.992
21:02:00	5.40417	1.307
21:12:00	5.41111	-0.537
21:22:00	5.41806	0.32
21:32:00	5.425	1.191
21:42:00	5.43194	0.85
21:52:00	5.43889	0.566
22:02:00	5.44583	0.877
22:12:00	5.45278	0.803
22:22:00	5.45972	1.04
22:32:00	5.46667	-0.405
22:42:00	5.47361	0.601
22:52:00	5.48056	0.546
23:02:00	5.4875	-0.523
23:12:00	5.49444	0.502
23:22:00	5.50139	-0.055
23:32:00	5.50833	-2.007
23:42:00	5.51528	0.246
23:52:00	5.52222	0.287
00:02:00	5.52917	-0.834
00:12:00	5.53611	0.583
00:22:00	5.54306	-0.06
00:32:00	5.55	-0.46
00:42:00	5.55694	-0.322
00:52:00	5.56389	0.437
01:02:00	5.57083	0.608
01:12:00	5.57778	0.139
01:22:00	5.58472	1.255
01:32:00	5.59167	0.919
01:42:00	5.59861	0.718
01:52:00	5.60556	-0.217
02:02:00	5.6125	-0.007
02:12:00	5.61944	0.203
02:22:00	5.62639	0.87
02:32:00	5.63333	-0.241
02:42:00	5.64028	0.055
02:52:00	5.64722	0.309
03:02:00	5.65417	-1.156
03:12:00	5.66111	0.216
03:22:00	5.66806	0.544
03:32:00	5.675	-1.087
03:42:00	5.68194	-1.516
03:52:00	5.68889	0.037
04:02:00	5.69583	1.535
04:12:00	5.70278	0.564
04:22:00	5.70972	1.054
04:32:00	5.71667	-0.149
04:42:00	5.72361	-0.2
04:52:00	5.73056	1.964
05:02:00	5.7375	-1.219
05:12:00	5.74444	1.201
05:22:00	5.75139	1.173
05:32:00	5.75833	-0.291
05:42:00	5.76528	0.184
05:52:00	5.77222	1.482
06:02:00	5.77917	0.681
06:12:00	5.78611	-0.36
06:22:00	5.79306	0.8
06:32:00	5.8	0.182
06:42:00	5.80694	1.045
06:52:00	5.81389	0.526
07:02:00	5.82083	1.191
07:12:00	5.82778	0.165
07:22:00	5.83472	-0.908
07:32:00	5.84167	-0.296
07:42:00	5.84861	1.147
07:52:00	5.85556	0.143
08:02:00	5.8625	1.36
08:12:00	5.86944	0.602
08:22:00	5.87639	0.989
08:32:00	5.88333	-0.01
08:42:00	5.89028	-0.051
08:52:00	5.89722	-0.376
09:02:00	5.90417	0.367
09:12:00	5.91111	0.586
09:22:00	5.91806	1.511
09:32:00	5.925	0.846
09:42:00	5.93194	0.169
09:52:00	5.93889	-0.382
10:02:00	5.94583	0.258
10:12:00	5.95278	0.66
10:22:00	5.95972	-0.083
10:32:00	5.96667	-0.163
10:42:00	5.97361	1.899
10:52:00	5.98056	0.039
11:02:00	5.9875	0.221
11:12:00	5.99444	-1.426
11:22:00	6.00139	1.362
11:32:00	6.00833	0.927
11:42:00	6.01528	0.86
11:52:00	6.02222	0.412
12:02:00	6.02917	-0.218
12:12:00	6.03611	0.712
12:22:00	6.04306	1.461
12:32:00	6.05	-0.367
12:42:00	6.05694	0.652
12:52:00	6.06389	0.372
13:02:00	6.07083	0.009
13:12:00	6.07778	-0.25
13:22:00	6.08472	-0.25
13:32:00	6.09167	-0.532
13:42:00	6.09861	-0.237
13:52:00	6.10556	0.393
14:02:00	6.1125	0.222
14:12:00	6.11944	-0.167
14:22:00	6.12639	0.673
14:32:00	6.13333	-0.339
14:42:00	6.14028	0.504
14:52:00	6.14722	-0.264
15:02:00	6.15417	-0.503
15:12:00	6.16111	-0.275
15:22:00	6.16806	-0.692
15:32:00	6.175	-0.234
15:42:00	6.18194	0.284
15:52:00	6.18889	-0.095
16:02:00	6.19583	0.354
16:12:00	6.20278	-1.439
16:22:00	6.20972	0.474
16:32:00	6.21667	-0.249
16:42:00	6.22361	-0.387
16:52:00	6.23056	-0.206
17:02:00	6.2375	0.488
17:12:00	6.24444	-0.411
17:22:00	6.25139	0.202
17:32:00	6.25833	-0.452
17:42:00	6.26528	-0.187
17:52:00	6.27222	-0.177
18:02:00	6.27917	-0.108
18:12:00	6.28611	-1.018
18:22:00	6.29306	-0.406
18:32:00	6.3	-0.757
18:42:00	6.30694	1.235
18:52:00	6.31389	-0.376
19:02:00	6.32083	-1.415
19:12:00	6.32778	-1.053
19:22:00	6.33472	-0.4
19:32:00	6.34167	-1.215
19:42:00	6.34861	0.051
19:52:00	6.35556	0.836
20:02:00	6.3625	-0.713
20:12:00	6.36944	1.091
20:22:00	6.37639	0.155
20:32:00	6.38333	-1.703
20:42:00	6.39028	-0.025
20:52:00	6.39722	-0.948
21:02:00	6.40417	-0.478
21:12:00	6.41111	-1.689
21:22:00	6.41806	0.533
21:32:00	6.425	0.383
21:42:00	6.43194	-0.908
21:52:00	6.43889	-0.134
22:02:00	6.44583	1.292
22:12:00	6.45278	-0.796
22:22:00	6.45972	0.215
22:32:00	6.46667	-0.738
22:42:00	6.47361	0.311
22:52:00	6.48056	0.72
23:02:00	6.4875	-0.227
23:12:00	6.49444	0.203
23:22:00	6.50139	-1.571
23:32:00	6.50833	0.961
23:42:00	6.51528	-0.509
23:52:00	6.52222	-1.37
00:02:00	6.52917	-1.995
00:12:00	6.53611	1.301
00:22:00	6.54306	0.106
00:32:00	6.55	-0.231
00:42:00	6.55694	-0.099
00:52:00	6.56389	-0.189
01:02:00	6.57083	0.967
01:12:00	6.57778	-0.212
01:22:00	6.58472	-0.054
01:32:00	6.59167	-0.392
01:42:00	6.59861	-0.375
01:52:00	6.60556	-0.066
02:02:00	6.6125	0.061
02:12:00	6.61944	1.107
02:22:00	6.62639	0.683
02:32:00	6.63333	-0.063
02:42:00	6.64028	-0.4
02:52:00	6.64722	1.22
03:02:00	6.65417	-1.074
03:12:00	6.66111	-1.286
03:22:00	6.66806	0.932
03:32:00	6.675	0.07
03:42:00	6.68194	0.681
03:52:00	6.68889	0.409
04:02:00	6.69583	0.344
04:12:00	6.70278	0.394
04:22:00	6.70972	-0.207
04:32:00	6.71667	-0.414
04:42:00	6.72361	0.24
04:52:00	6.73056	0.848
05:02:00	6.7375	0.417
05:12:00	6.74444	0.12
05:22:00	6.75139	1.706
05:32:00	6.75833	-0.392
05:42:00	6.76528	-0.772
05:52:00	6.77222	0.833
06:02:00	6.77917	-0.329
06:12:00	6.78611	0.978
06:22:00	6.79306	-0.135
06:32:00	6.8	-0.428
06:42:00	6.80694	1.201
06:52:00	6.81389	0.229
07:02:00	6.82083	-0.31
07:12:00	6.82778	-0.225
07:22:00	6.83472	0.415
07:32:00	6.84167	-0.247
07:42:00	6.84861	-0.53
07:52:00	6.85556	1.033
08:02:00	6.8625	-0.329
08:12:00	6.86944	0.212
08:22:00	6.87639	0.633
08:32:00	6.88333	0.373
08:42:00	6.89028	0.642
08:52:00	6.89722	0.645
09:02:00	6.90417	0.567
09:12:00	6.91111	-0.39
09:22:00	6.91806	0.898
09:32:00	6.925	0.186
09:42:00	6.93194	1.032
09:52:00	6.93889	0.418
10:02:00	6.94583	1.676
10:12:00	6.95278	-0.368
10:22:00	6.95972	0.864
10:32:00	6.96667	0.598
10:42:00	6.97361	-0.689
10:52:00	6.98056	0.223
11:02:00	6.9875	-0.276
11:12:00	6.99444	0.81
11:22:00	7.00139	-1.459
11:32:00	7.00833	1.059
11:42:00	7.01528	0.764
11:52:00	7.02222	-0.072
12:02:00	7.02917	0.883
12:12:00	7.03611	-0.557
12:22:00	7.04306	-0.299
12:32:00	7.05	0.153
12:42:00	7.05694	0.507
12:52:00	7.06389	0.881
13:02:00	7.07083	0.307
13:12:00	7.07778	-0.812
13:22:00	7.08472	-0.169
13:32:00	7.09167	1.032
13:42:00	7.09861	1.216
13:52:00	7.10556	-0.455
14:02:00	7.1125	0.947
14:12:00	7.11944	0.499
14:22:00	7.12639	-0.308
14:32:00	7.13333	0.882
14:42:00	7.14028	-0.368
14:52:00	7.14722	-1.074
