# Supplementary material for: The nutrient-sensing GCN2 signaling pathway is essential for circadian clock function by regulating histone acetylation under amino acid starvation
Source: eLife journal article supplement (doi:10.7554/elife.85241), 2023-04-21
Supplement: fig5-data2 [file Figure 5-source data 2-4.xlsx]

## Sheet: FRQ rhythm
Hrs in DD	WT	WT	WT	gcn-5KO	gcn-5KO	gcn-5KO
0	1	1	1	1.18213	1.08309	1.03464
4	0.62846	0.643842	0.650584	0.720835	0.891853	0.711286
8	0.317326	0.310125	0.398964	0.297191	0.164357	0.257311
12	0.233666	0.233395	0.16114	0.266753	0.17519	0.209384
16	0.432272	0.307425	0.248258	0.343084	0.197403	0.251013
20	0.606523	0.664223	0.685748	0.495735	0.36082	0.47342
24	0.518136	0.411727	0.567085	0.33079	0.386748	0.490278
28	0.417863	0.307096	0.424249	0.365134	0.226409	0.363494
32	0.371251	0.257311	0.159986	0.356063	0.173207	0.336234
36	0.299652	0.377306	0.444896	0.274855	0.352088	0.254569
40	0.469016	0.605339	0.409503	0.411599	0.295175	0.295751
44	0.593761	0.559941	0.764536	0.207389	0.219305	0.378452
48	0.454176	0.37287	0.54805	0.385287	0.192866	0.249442
