# Supplementary material for: The nutrient-sensing GCN2 signaling pathway is essential for circadian clock function by regulating histone acetylation under amino acid starvation
Source: eLife journal article supplement (doi:10.7554/elife.85241), 2023-04-21
Supplement: fig5-data3 [file Figure 5-source data 3.xlsx]

## Sheet: frq rhythm+0mM 3-AT
Hrs in DD	WT	WT	WT	gcn-5KO	gcn-5KO	gcn-5KO
0	1.00001	0.999998	0.999995	1.37393	1.32583	1.49019
4	0.253786	0.254126	0.243806	0.342681	0.275444	0.343761
8	0.211971	0.206867	0.214208	0.284697	0.373281	0.339679
12	0.299167	0.289525	0.278854	0.314442	0.372666	0.468863
16	1.08671	1.05206	1.02988	0.461553	0.718508	0.502579
20	0.728184	0.669826	0.702436	0.397312	0.431901	0.420154
24	0.325023	0.311952	0.317528	0.374706	0.318655	0.549036
28	0.427526	0.433849	0.396523	0.366281	0.542811	0.513753
32	0.514707	0.497251	0.494577	0.493655	0.547718	0.530234
36	0.551906	0.542869	0.514981	0.385093	0.436691	0.436898
40	0.769097	0.757988	0.879306	0.409916	0.419895	0.538301
44	0.577651	0.557816	0.584686	0.529695	0.373887	0.460889
48	0.48292	0.489258	0.546195	0.275353	0.45291	0.482162
