# Supplementary material for: The nutrient-sensing GCN2 signaling pathway is essential for circadian clock function by regulating histone acetylation under amino acid starvation
Source: eLife journal article supplement (doi:10.7554/elife.85241), 2023-04-21
Supplement: fig5-data4 [file Figure 5-source data 4.xlsx]

## Sheet: frq rhythm+3mM 3-AT
Hrs in DD	WT	WT	WT	gcn-5KO	gcn-5KO	gcn-5KO
0	0.999999	0.999994	0.999997	1.98311	1.85367	1.25641
4	0.212372	0.283029	0.133969	0.221621	0.416672	0.337785
8	0.222125	0.277181	0.276549	0.329392	0.564224	0.341026
12	0.448499	0.483972	0.309128	0.512353	0.779019	0.588609
16	0.825159	0.805582	0.988	0.392459	0.776071	0.616975
20	1.11654	1.0721	1.43415	0.267533	0.64607	0.471285
24	0.469907	0.491721	0.521774	0.364999	0.623313	0.490654
28	0.385101	0.381353	0.462248	0.385044	0.645035	0.596821
32	0.329351	0.335725	0.327657	0.376812	0.717985	0.467029
36	0.316884	0.555851	0.316876	0.359894	0.679349	0.375486
40	0.785749	0.967328	0.758178	0.371756	0.64217	0.434681
44	1.08713	1.11189	0.837722	0.499772	0.719556	0.31
48	0.457423	0.629491	0.409609	0.413387	0.818865	0.499006
