# Supplementary material for: The nutrient-sensing GCN2 signaling pathway is essential for circadian clock function by regulating histone acetylation under amino acid starvation
Source: eLife journal article supplement (doi:10.7554/elife.85241), 2023-04-21
Supplement: fig5-data5 [file Figure 5-source data 5.xlsx]

## Sheet: H3ac-ChIP-WT VS gcn-5KO
Hrs in DD	WT	WT	WT	gcn-5KO	gcn-5KO	gcn-5KO
DD10	0.1158	0.098402	0.110389	0.105341	0.0623096	0.0874399
DD14	0.220768	0.22226	0.239516	0.152321	0.113667	0.0412665
DD18	0.268686	0.31581	0.363109	0.158303	0.191678	0.119377
DD22	0.14452	0.108424	0.178217	0.155997	0.116414	0.0757614
