# Supplementary material for: The nutrient-sensing GCN2 signaling pathway is essential for circadian clock function by regulating histone acetylation under amino acid starvation
Source: eLife journal article supplement (doi:10.7554/elife.85241), 2023-04-21
Supplement: fig5-data6 [file Figure 5-source data 6.xlsx]

## Sheet: WC2-ChIP-WT VS gcn-5KO
Hrs in DD	WT	WT	WT	gcn-5KO	gcn-5KO	gcn-5KO
DD10	0.1129	0.1556	0.103	0.0576	0.0239	0.1028
DD14	0.3291	0.2531	0.3898	0.1145	0.0709	0.1139
DD18	0.2558	0.2132	0.1234	0.0546	0.1106	0.1059
DD22	0.0438	0.061	0.041	0.0327	0.0628	0.0679
