# Supplementary material for: The nutrient-sensing GCN2 signaling pathway is essential for circadian clock function by regulating histone acetylation under amino acid starvation
Source: eLife journal article supplement (doi:10.7554/elife.85241), 2023-04-21
Supplement: fig5-figsupp1-data1 [file Figure 5-figure supplement 1-source data 1.xlsx]

## Sheet: WT-raw data
LumiCycle: WT-FRQ-luc (Raw)
Time (hr:min)	Time (days)	counts/sec
01:10:00	1.04861	591.12
01:20:00	1.05556	595.76
01:30:00	1.0625	578.614
01:40:00	1.06944	572.894
01:50:00	1.07639	569.37
02:00:00	1.08333	570.631
02:10:00	1.09028	571.937
02:20:00	1.09722	555.692
02:30:00	1.10417	561.845
02:40:00	1.11111	549.808
02:50:00	1.11806	558.254
03:00:00	1.125	551.918
03:10:00	1.13194	549.705
03:20:00	1.13889	558.372
03:30:00	1.14583	549.427
03:40:00	1.15278	553.753
03:50:00	1.15972	551.405
04:00:00	1.16667	554.649
04:10:00	1.17361	557.941
04:20:00	1.18056	561.385
04:30:00	1.1875	564.692
04:40:00	1.19444	568.374
04:50:00	1.20139	566.911
05:00:00	1.20833	575.594
05:10:00	1.21528	577.423
05:20:00	1.22222	585.806
05:30:00	1.22917	585.994
05:40:00	1.23611	582.508
05:50:00	1.24306	602.439
06:00:00	1.25	599.395
06:10:00	1.25694	613.213
06:20:00	1.26389	612.812
06:30:00	1.27083	622.292
06:40:00	1.27778	629.097
06:50:00	1.28472	633.768
07:00:00	1.29167	639.626
07:10:00	1.29861	643.043
07:20:00	1.30556	656.159
07:30:00	1.3125	661.24
07:40:00	1.31944	673.564
07:50:00	1.32639	677.266
08:00:00	1.33333	683.186
08:10:00	1.34028	692.233
08:20:00	1.34722	702.7
08:30:00	1.35417	708.052
08:40:00	1.36111	718.999
08:50:00	1.36806	718.574
09:00:00	1.375	735.703
09:10:00	1.38194	743.817
09:20:00	1.38889	747.007
09:30:00	1.39583	757.544
09:40:00	1.40278	766.534
09:50:00	1.40972	775.129
10:00:00	1.41667	783.624
10:10:00	1.42361	786.799
10:20:00	1.43056	805.874
10:30:00	1.4375	814.811
10:40:00	1.44444	821.121
10:50:00	1.45139	831.059
11:00:00	1.45833	839.276
11:10:00	1.46528	842.958
11:20:00	1.47222	858.516
11:30:00	1.47917	868.403
11:40:00	1.48611	875.034
11:50:00	1.49306	878.504
12:00:00	1.5	886.878
12:10:00	1.50694	894.755
12:20:00	1.51389	899.732
12:30:00	1.52083	913.374
12:40:00	1.52778	911.147
12:50:00	1.53472	918.553
13:00:00	1.54167	932.37
13:10:00	1.54861	929.726
13:20:00	1.55556	932.818
13:30:00	1.5625	939.276
13:40:00	1.56944	954.232
13:50:00	1.57639	943.535
14:00:00	1.58333	959.716
14:10:00	1.59028	960.836
14:20:00	1.59722	963.307
14:30:00	1.60417	965.378
14:40:00	1.61111	964.869
14:50:00	1.61806	965.124
15:00:00	1.625	964.227
15:10:00	1.63194	971.408
15:20:00	1.63889	971.165
15:30:00	1.64583	971.543
15:40:00	1.65278	977.745
15:50:00	1.65972	981.053
16:00:00	1.66667	976.297
16:10:00	1.67361	984.767
16:20:00	1.68056	977.201
16:30:00	1.6875	973.031
16:40:00	1.69444	973.048
16:50:00	1.70139	966.431
17:00:00	1.70833	971.008
17:10:00	1.71528	969.01
17:20:00	1.72222	966.055
17:30:00	1.72917	965.622
17:40:00	1.73611	965.852
17:50:00	1.74306	963.453
18:00:00	1.75	969.322
18:10:00	1.75694	952.216
18:20:00	1.76389	956.583
18:30:00	1.77083	960.912
18:40:00	1.77778	959.076
18:50:00	1.78472	948.205
19:00:00	1.79167	949.364
19:10:00	1.79861	936.855
19:20:00	1.80556	941.391
19:30:00	1.8125	936.091
19:40:00	1.81944	938.883
19:50:00	1.82639	930.915
20:00:00	1.83333	933.112
20:10:00	1.84028	925.448
20:20:00	1.84722	923.552
20:30:00	1.85417	928.557
20:40:00	1.86111	918.195
20:50:00	1.86806	917.866
21:00:00	1.875	926.086
21:10:00	1.88194	916.414
21:20:00	1.88889	914.272
21:30:00	1.89583	915.029
21:40:00	1.90278	915.446
21:50:00	1.90972	914.706
22:00:00	1.91667	910.903
22:10:00	1.92361	909.433
22:20:00	1.93056	910.154
22:30:00	1.9375	899.854
22:40:00	1.94444	901.274
22:50:00	1.95139	905.097
23:00:00	1.95833	899.601
23:10:00	1.96528	902.711
23:20:00	1.97222	909.874
23:30:00	1.97917	901.176
23:40:00	1.98611	904.324
23:50:00	1.99306	904.797
00:00:00	2	906.089
00:10:00	2.00694	902.602
00:20:00	2.01389	906.196
00:30:00	2.02083	909.284
00:40:00	2.02778	908.064
00:50:00	2.03472	905.456
01:00:00	2.04167	903.349
01:10:00	2.04861	909.008
01:20:00	2.05556	911.57
01:30:00	2.0625	917.754
01:40:00	2.06944	919.979
01:50:00	2.07639	915.512
02:00:00	2.08333	925.034
02:10:00	2.09028	926.237
02:20:00	2.09722	927.006
02:30:00	2.10417	934.471
02:40:00	2.11111	936.278
02:50:00	2.11806	942.901
03:00:00	2.125	948.628
03:10:00	2.13194	943.095
03:20:00	2.13889	948.877
03:30:00	2.14583	961.763
03:40:00	2.15278	961.122
03:50:00	2.15972	971.953
04:00:00	2.16667	972.718
04:10:00	2.17361	973.684
04:20:00	2.18056	972.119
04:30:00	2.1875	984.026
04:40:00	2.19444	982.807
04:50:00	2.20139	996.143
05:00:00	2.20833	997.018
05:10:00	2.21528	993.44
05:20:00	2.22222	1001.51
05:30:00	2.22917	1014.53
05:40:00	2.23611	1018.5
05:50:00	2.24306	1025.96
06:00:00	2.25	1034.21
06:10:00	2.25694	1027.1
06:20:00	2.26389	1030.38
06:30:00	2.27083	1036.46
06:40:00	2.27778	1035.95
06:50:00	2.28472	1052.5
07:00:00	2.29167	1054.37
07:10:00	2.29861	1055.26
07:20:00	2.30556	1054.78
07:30:00	2.3125	1064.37
07:40:00	2.31944	1064.55
07:50:00	2.32639	1066.61
08:00:00	2.33333	1066.99
08:10:00	2.34028	1068.91
08:20:00	2.34722	1073.98
08:30:00	2.35417	1080.62
08:40:00	2.36111	1078.7
08:50:00	2.36806	1082.14
09:00:00	2.375	1083.85
09:10:00	2.38194	1087.04
09:20:00	2.38889	1097.71
09:30:00	2.39583	1088.53
09:40:00	2.40278	1094.82
09:50:00	2.40972	1092.73
10:00:00	2.41667	1092.43
10:10:00	2.42361	1102.39
10:20:00	2.43056	1105.6
10:30:00	2.4375	1110.78
10:40:00	2.44444	1097.31
10:50:00	2.45139	1109.66
11:00:00	2.45833	1101.92
11:10:00	2.46528	1117.6
11:20:00	2.47222	1105.93
11:30:00	2.47917	1121.83
11:40:00	2.48611	1118.07
11:50:00	2.49306	1117.3
12:00:00	2.5	1112.07
12:10:00	2.50694	1114.51
12:20:00	2.51389	1111.45
12:30:00	2.52083	1111.15
12:40:00	2.52778	1103.48
12:50:00	2.53472	1112.08
13:00:00	2.54167	1105.81
13:10:00	2.54861	1107.56
13:20:00	2.55556	1104.69
13:30:00	2.5625	1095.69
13:40:00	2.56944	1098.96
13:50:00	2.57639	1099.61
14:00:00	2.58333	1104.74
14:10:00	2.59028	1098.18
14:20:00	2.59722	1096.18
14:30:00	2.60417	1093.77
14:40:00	2.61111	1090.98
14:50:00	2.61806	1088.9
15:00:00	2.625	1087.99
15:10:00	2.63194	1084.13
15:20:00	2.63889	1080.68
15:30:00	2.64583	1075.36
15:40:00	2.65278	1081.37
15:50:00	2.65972	1070.59
16:00:00	2.66667	1068.74
16:10:00	2.67361	1070.55
16:20:00	2.68056	1065.08
16:30:00	2.6875	1065.59
16:40:00	2.69444	1061.71
16:50:00	2.70139	1059.73
17:00:00	2.70833	1055.47
17:10:00	2.71528	1053.5
17:20:00	2.72222	1053.27
17:30:00	2.72917	1053.6
17:40:00	2.73611	1037.19
17:50:00	2.74306	1045.9
18:00:00	2.75	1048.3
18:10:00	2.75694	1041.73
18:20:00	2.76389	1036.93
18:30:00	2.77083	1040.25
18:40:00	2.77778	1036.88
18:50:00	2.78472	1032.8
19:00:00	2.79167	1034.66
19:10:00	2.79861	1033.81
19:20:00	2.80556	1029.03
19:30:00	2.8125	1036.25
19:40:00	2.81944	1028.44
19:50:00	2.82639	1020.49
20:00:00	2.83333	1026.93
20:10:00	2.84028	1030.41
20:20:00	2.84722	1025.51
20:30:00	2.85417	1029.66
20:40:00	2.86111	1026.95
20:50:00	2.86806	1031.42
21:00:00	2.875	1031.62
21:10:00	2.88194	1017.32
21:20:00	2.88889	1024.08
21:30:00	2.89583	1022.04
21:40:00	2.90278	1018.24
21:50:00	2.90972	1020.85
22:00:00	2.91667	1023.93
22:10:00	2.92361	1025.79
22:20:00	2.93056	1026.12
22:30:00	2.9375	1028.35
22:40:00	2.94444	1021.38
22:50:00	2.95139	1020.91
23:00:00	2.95833	1029.47
23:10:00	2.96528	1022.65
23:20:00	2.97222	1027.87
23:30:00	2.97917	1029.42
23:40:00	2.98611	1032.79
23:50:00	2.99306	1032.22
00:00:00	3	1028.26
00:10:00	3.00694	1029.82
00:20:00	3.01389	1030.94
00:30:00	3.02083	1036.13
00:40:00	3.02778	1034.21
00:50:00	3.03472	1035.75
01:00:00	3.04167	1044.23
01:10:00	3.04861	1044.94
01:20:00	3.05556	1038.3
01:30:00	3.0625	1042.05
01:40:00	3.06944	1039.62
01:50:00	3.07639	1046.45
02:00:00	3.08333	1059.84
02:10:00	3.09028	1053.79
02:20:00	3.09722	1057.71
02:30:00	3.10417	1059.96
02:40:00	3.11111	1062.91
02:50:00	3.11806	1066.24
03:00:00	3.125	1065.83
03:10:00	3.13194	1069.27
03:20:00	3.13889	1073.45
03:30:00	3.14583	1071.51
03:40:00	3.15278	1078.35
03:50:00	3.15972	1078.02
04:00:00	3.16667	1080.32
04:10:00	3.17361	1082.7
04:20:00	3.18056	1090.99
04:30:00	3.1875	1093.05
04:40:00	3.19444	1095.14
04:50:00	3.20139	1105.12
05:00:00	3.20833	1104.82
05:10:00	3.21528	1098.66
05:20:00	3.22222	1115.81
05:30:00	3.22917	1117.81
05:40:00	3.23611	1118.35
05:50:00	3.24306	1122.46
06:00:00	3.25	1135.47
06:10:00	3.25694	1136.45
06:20:00	3.26389	1133.01
06:30:00	3.27083	1138.39
06:40:00	3.27778	1141.57
06:50:00	3.28472	1154.54
07:00:00	3.29167	1148.18
07:10:00	3.29861	1157.59
07:20:00	3.30556	1165.79
07:30:00	3.3125	1167.22
07:40:00	3.31944	1164.4
07:50:00	3.32639	1166.38
08:00:00	3.33333	1166.72
08:10:00	3.34028	1177.3
08:20:00	3.34722	1181.24
08:30:00	3.35417	1180.52
08:40:00	3.36111	1189.76
08:50:00	3.36806	1184.82
09:00:00	3.375	1196.27
09:10:00	3.38194	1195.46
09:20:00	3.38889	1205.86
09:30:00	3.39583	1198.24
09:40:00	3.40278	1203.61
09:50:00	3.40972	1196.75
10:00:00	3.41667	1208.02
10:10:00	3.42361	1205.96
10:20:00	3.43056	1213.52
10:30:00	3.4375	1210.4
10:40:00	3.44444	1204.48
10:50:00	3.45139	1210.75
11:00:00	3.45833	1214.64
11:10:00	3.46528	1214.74
11:20:00	3.47222	1212.68
11:30:00	3.47917	1218.01
11:40:00	3.48611	1215.84
11:50:00	3.49306	1215.62
12:00:00	3.5	1215.39
12:10:00	3.50694	1216.08
12:20:00	3.51389	1213.82
12:30:00	3.52083	1220.84
12:40:00	3.52778	1221.01
12:50:00	3.53472	1220.48
13:00:00	3.54167	1216.52
13:10:00	3.54861	1215.89
13:20:00	3.55556	1214.45
13:30:00	3.5625	1214.3
13:40:00	3.56944	1214.72
13:50:00	3.57639	1207.3
14:00:00	3.58333	1208.4
14:10:00	3.59028	1208.99
14:20:00	3.59722	1199.67
14:30:00	3.60417	1187.98
14:40:00	3.61111	1190.18
14:50:00	3.61806	1189.71
15:00:00	3.625	1189.94
15:10:00	3.63194	1191.75
15:20:00	3.63889	1186.61
15:30:00	3.64583	1188
15:40:00	3.65278	1175.69
15:50:00	3.65972	1178.32
16:00:00	3.66667	1166.66
16:10:00	3.67361	1174.9
16:20:00	3.68056	1167.62
16:30:00	3.6875	1157.26
16:40:00	3.69444	1161.98
16:50:00	3.70139	1157.51
17:00:00	3.70833	1147.86
17:10:00	3.71528	1151.52
17:20:00	3.72222	1136.51
17:30:00	3.72917	1143.44
17:40:00	3.73611	1140.4
17:50:00	3.74306	1132.79
18:00:00	3.75	1121.87
18:10:00	3.75694	1118.76
18:20:00	3.76389	1119.33
18:30:00	3.77083	1115.89
18:40:00	3.77778	1121.17
18:50:00	3.78472	1107.97
19:00:00	3.79167	1105.38
19:10:00	3.79861	1102.73
19:20:00	3.80556	1095.06
19:30:00	3.8125	1091.65
19:40:00	3.81944	1085.22
19:50:00	3.82639	1089.71
20:00:00	3.83333	1075.81
20:10:00	3.84028	1070.49
20:20:00	3.84722	1070.29
20:30:00	3.85417	1069.53
20:40:00	3.86111	1061.61
20:50:00	3.86806	1068.72
21:00:00	3.875	1060.95
21:10:00	3.88194	1055.28
21:20:00	3.88889	1050.79
21:30:00	3.89583	1046.61
21:40:00	3.90278	1043.01
21:50:00	3.90972	1049.75
22:00:00	3.91667	1038.61
22:10:00	3.92361	1036.49
22:20:00	3.93056	1031.74
22:30:00	3.9375	1027.18
22:40:00	3.94444	1035.47
22:50:00	3.95139	1019.97
23:00:00	3.95833	1019.65
23:10:00	3.96528	1025.31
23:20:00	3.97222	1008.02
23:30:00	3.97917	1015.12
23:40:00	3.98611	1008.68
23:50:00	3.99306	1001.36
00:00:00	4	1013.39
00:10:00	4.00694	999.625
00:20:00	4.01389	1009.69
00:30:00	4.02083	993.471
00:40:00	4.02778	995.201
00:50:00	4.03472	992.802
01:00:00	4.04167	990.193
01:10:00	4.04861	990.797
01:20:00	4.05556	991.294
01:30:00	4.0625	986.411
01:40:00	4.06944	990.866
01:50:00	4.07639	981.483
02:00:00	4.08333	969.544
02:10:00	4.09028	983.731
02:20:00	4.09722	982.087
02:30:00	4.10417	977.63
02:40:00	4.11111	969.096
02:50:00	4.11806	968.333
03:00:00	4.125	976.451
03:10:00	4.13194	969.825
03:20:00	4.13889	968.025
03:30:00	4.14583	960.335
03:40:00	4.15278	964.563
03:50:00	4.15972	974.835
04:00:00	4.16667	966.289
04:10:00	4.17361	965.572
04:20:00	4.18056	968.676
04:30:00	4.1875	961.581
04:40:00	4.19444	960.942
04:50:00	4.20139	969.321
05:00:00	4.20833	963.231
05:10:00	4.21528	968.851
05:20:00	4.22222	961.059
05:30:00	4.22917	970.339
05:40:00	4.23611	968.918
05:50:00	4.24306	973.73
06:00:00	4.25	968.5
06:10:00	4.25694	964.003
06:20:00	4.26389	969.32
06:30:00	4.27083	967.185
06:40:00	4.27778	971.656
06:50:00	4.28472	974.623
07:00:00	4.29167	973.158
07:10:00	4.29861	973.991
07:20:00	4.30556	968.487
07:30:00	4.3125	978.073
07:40:00	4.31944	980.511
07:50:00	4.32639	980.316
08:00:00	4.33333	972.173
08:10:00	4.34028	975.836
08:20:00	4.34722	976.178
08:30:00	4.35417	974.419
08:40:00	4.36111	979.024
08:50:00	4.36806	982.474
09:00:00	4.375	976.441
09:10:00	4.38194	986.847
09:20:00	4.38889	982.047
09:30:00	4.39583	989.041
09:40:00	4.40278	988.631
09:50:00	4.40972	985
10:00:00	4.41667	984.263
10:10:00	4.42361	982.677
10:20:00	4.43056	984.438
10:30:00	4.4375	988.528
10:40:00	4.44444	981.986
10:50:00	4.45139	995.031
11:00:00	4.45833	984.235
11:10:00	4.46528	981.171
11:20:00	4.47222	990.619
11:30:00	4.47917	987.481
11:40:00	4.48611	989.137
11:50:00	4.49306	986.723
12:00:00	4.5	982.536
12:10:00	4.50694	983.869
12:20:00	4.51389	982.997
12:30:00	4.52083	981.438
12:40:00	4.52778	973.176
12:50:00	4.53472	975.753
13:00:00	4.54167	974.393
13:10:00	4.54861	978.341
13:20:00	4.55556	969.615
13:30:00	4.5625	972.9
13:40:00	4.56944	968.909
13:50:00	4.57639	964.901
14:00:00	4.58333	968.174
14:10:00	4.59028	961.444
14:20:00	4.59722	964.247
14:30:00	4.60417	959.524
14:40:00	4.61111	954.742
14:50:00	4.61806	957.512
15:00:00	4.625	956.536
15:10:00	4.63194	955.507
15:20:00	4.63889	954.014
15:30:00	4.64583	952.391
15:40:00	4.65278	947.778
15:50:00	4.65972	944.501
16:00:00	4.66667	936.881
16:10:00	4.67361	944.677
16:20:00	4.68056	926.403
16:30:00	4.6875	925.279
16:40:00	4.69444	925.202
16:50:00	4.70139	926.17
17:00:00	4.70833	917.697
17:10:00	4.71528	913.295
17:20:00	4.72222	910.902
17:30:00	4.72917	906.872
17:40:00	4.73611	906.155
17:50:00	4.74306	911.924
18:00:00	4.75	903.554
18:10:00	4.75694	905.402
18:20:00	4.76389	896.546
18:30:00	4.77083	893.617
18:40:00	4.77778	889.557
18:50:00	4.78472	892.024
19:00:00	4.79167	883.898
19:10:00	4.79861	872.957
19:20:00	4.80556	868.673
19:30:00	4.8125	867.844
19:40:00	4.81944	865.503
19:50:00	4.82639	866.975
20:00:00	4.83333	859.337
20:10:00	4.84028	851.344
20:20:00	4.84722	849.057
20:30:00	4.85417	844.56
20:40:00	4.86111	847.797
20:50:00	4.86806	841.403
21:00:00	4.875	833.302
21:10:00	4.88194	836.818
21:20:00	4.88889	828.014
21:30:00	4.89583	828.25
21:40:00	4.90278	820.078
21:50:00	4.90972	824.815
22:00:00	4.91667	817.114
22:10:00	4.92361	816.471
22:20:00	4.93056	815.761
22:30:00	4.9375	812.191
22:40:00	4.94444	804.863
22:50:00	4.95139	802.198
23:00:00	4.95833	798.817
23:10:00	4.96528	793.987
23:20:00	4.97222	795.383
23:30:00	4.97917	799.029
23:40:00	4.98611	786.823
23:50:00	4.99306	788.722
00:00:00	5	780.449
00:10:00	5.00694	778.868
00:20:00	5.01389	779.052
00:30:00	5.02083	779.569
00:40:00	5.02778	774.332
00:50:00	5.03472	768.812
01:00:00	5.04167	765.983
01:10:00	5.04861	768.119
01:20:00	5.05556	765.966
01:30:00	5.0625	762.132
01:40:00	5.06944	754.673
01:50:00	5.07639	752.331
02:00:00	5.08333	754.917
02:10:00	5.09028	751.315
02:20:00	5.09722	754.296
02:30:00	5.10417	749.215
02:40:00	5.11111	745.345
02:50:00	5.11806	745.566
03:00:00	5.125	746.552
03:10:00	5.13194	741.054
03:20:00	5.13889	739.296
03:30:00	5.14583	733.117
03:40:00	5.15278	744.741
03:50:00	5.15972	736.684
04:00:00	5.16667	733.354
04:10:00	5.17361	727.543
04:20:00	5.18056	729.101
04:30:00	5.1875	729.43
04:40:00	5.19444	726.938
04:50:00	5.20139	731.213
05:00:00	5.20833	723.766
05:10:00	5.21528	725.085
05:20:00	5.22222	721.294
05:30:00	5.22917	721.974
05:40:00	5.23611	722.458
05:50:00	5.24306	715.731
06:00:00	5.25	714.24
06:10:00	5.25694	716.087
06:20:00	5.26389	715.914
06:30:00	5.27083	714.804
06:40:00	5.27778	717.655
06:50:00	5.28472	708.817
07:00:00	5.29167	713.373
07:10:00	5.29861	708.728
07:20:00	5.30556	715.303
07:30:00	5.3125	710.567
07:40:00	5.31944	706.757
07:50:00	5.32639	705.971
08:00:00	5.33333	712.281
08:10:00	5.34028	700.091
08:20:00	5.34722	703.467
08:30:00	5.35417	706.5
08:40:00	5.36111	704.354
08:50:00	5.36806	707.369
09:00:00	5.375	697.991
09:10:00	5.38194	702.916
09:20:00	5.38889	700.242
09:30:00	5.39583	701.598
09:40:00	5.40278	699.088
09:50:00	5.40972	700.833
10:00:00	5.41667	697.941
10:10:00	5.42361	687.129
10:20:00	5.43056	694.301
10:30:00	5.4375	699.97
10:40:00	5.44444	686.86
10:50:00	5.45139	692.91
11:00:00	5.45833	687.082
11:10:00	5.46528	686.834
11:20:00	5.47222	689.496
11:30:00	5.47917	690.368
11:40:00	5.48611	690.913
11:50:00	5.49306	683.74
12:00:00	5.5	683.521
12:10:00	5.50694	685.469
12:20:00	5.51389	685.718
12:30:00	5.52083	678.006
12:40:00	5.52778	681.777
12:50:00	5.53472	683.707
13:00:00	5.54167	683.734
13:10:00	5.54861	675.481
13:20:00	5.55556	672.802
13:30:00	5.5625	681.419
13:40:00	5.56944	674.31
13:50:00	5.57639	674.112
14:00:00	5.58333	677.216
14:10:00	5.59028	675.484
14:20:00	5.59722	679.637
14:30:00	5.60417	667.867
14:40:00	5.61111	669.428
14:50:00	5.61806	675.265
15:00:00	5.625	667.07
15:10:00	5.63194	670.958
15:20:00	5.63889	667.866
15:30:00	5.64583	667.387
15:40:00	5.65278	660.948
15:50:00	5.65972	667.902
16:00:00	5.66667	661.962
16:10:00	5.67361	664.865
16:20:00	5.68056	654.236
16:30:00	5.6875	662.168
16:40:00	5.69444	658.844
16:50:00	5.70139	655.077
17:00:00	5.70833	664.112
17:10:00	5.71528	653.731
17:20:00	5.72222	656.578
17:30:00	5.72917	655.303
17:40:00	5.73611	655.651
17:50:00	5.74306	654.783
18:00:00	5.75	648.919
18:10:00	5.75694	651.251
18:20:00	5.76389	648.039
18:30:00	5.77083	641.738
18:40:00	5.77778	646.777
18:50:00	5.78472	645.955
19:00:00	5.79167	642.297
19:10:00	5.79861	642.238
19:20:00	5.80556	644.39
19:30:00	5.8125	640.119
19:40:00	5.81944	635.705
19:50:00	5.82639	633.761
20:00:00	5.83333	634.211
20:10:00	5.84028	639.299
20:20:00	5.84722	634.08
20:30:00	5.85417	628.146
20:40:00	5.86111	625.951
20:50:00	5.86806	630.088
21:00:00	5.875	625.486
21:10:00	5.88194	621.107
21:20:00	5.88889	620.307
21:30:00	5.89583	614.464
21:40:00	5.90278	621.784
21:50:00	5.90972	619.833
22:00:00	5.91667	618.483
22:10:00	5.92361	611.43
22:20:00	5.93056	611.323
22:30:00	5.9375	610.862
22:40:00	5.94444	609.213
22:50:00	5.95139	602.997
23:00:00	5.95833	605.665
23:10:00	5.96528	597.449
23:20:00	5.97222	600.77
23:30:00	5.97917	602.351
23:40:00	5.98611	593.236
23:50:00	5.99306	597.379
00:00:00	6	593.866
00:10:00	6.00694	592.606
00:20:00	6.01389	594.577
00:30:00	6.02083	586.002
00:40:00	6.02778	586.994
00:50:00	6.03472	585.558
01:00:00	6.04167	583.153
01:10:00	6.04861	585.492
01:20:00	6.05556	581.319
01:30:00	6.0625	575.87
01:40:00	6.06944	576.184
01:50:00	6.07639	577.452
02:00:00	6.08333	575.687
02:10:00	6.09028	575.243
02:20:00	6.09722	570.303
02:30:00	6.10417	571.659
02:40:00	6.11111	576.169
02:50:00	6.11806	570.49
03:00:00	6.125	566.577
03:10:00	6.13194	563.449
03:20:00	6.13889	553.501
03:30:00	6.14583	564.666
03:40:00	6.15278	561.495
03:50:00	6.15972	560.519
04:00:00	6.16667	557.621
04:10:00	6.17361	557.987
04:20:00	6.18056	553.483
04:30:00	6.1875	554.82
04:40:00	6.19444	547.465
04:50:00	6.20139	544.246
05:00:00	6.20833	550.926
05:10:00	6.21528	544.827
05:20:00	6.22222	546.098
05:30:00	6.22917	547.678
05:40:00	6.23611	549.982
05:50:00	6.24306	543.499
06:00:00	6.25	543.32
06:10:00	6.25694	545.755
06:20:00	6.26389	540.4
06:30:00	6.27083	545.865
06:40:00	6.27778	538.792
06:50:00	6.28472	537.855
07:00:00	6.29167	534.594
07:10:00	6.29861	539.752
07:20:00	6.30556	534.285
07:30:00	6.3125	536.802
07:40:00	6.31944	539.911
07:50:00	6.32639	539.245
08:00:00	6.33333	534.238
08:10:00	6.34028	539.911
08:20:00	6.34722	533.668
08:30:00	6.35417	540.399
08:40:00	6.36111	533.151
08:50:00	6.36806	541.043
09:00:00	6.375	534.096
09:10:00	6.38194	534.846
09:20:00	6.38889	536.341
09:30:00	6.39583	532.866
09:40:00	6.40278	536.19
09:50:00	6.40972	537.77
10:00:00	6.41667	528.654
10:10:00	6.42361	536.082
10:20:00	6.43056	532.526
10:30:00	6.4375	535.017
10:40:00	6.44444	538.311
10:50:00	6.45139	536.401
11:00:00	6.45833	531.484
11:10:00	6.46528	530.392
11:20:00	6.47222	532.271
11:30:00	6.47917	524.27
11:40:00	6.48611	529.653
11:50:00	6.49306	529.063
12:00:00	6.5	534.533
12:10:00	6.50694	528.95
12:20:00	6.51389	537.31
12:30:00	6.52083	533.204
12:40:00	6.52778	532.32
12:50:00	6.53472	530.464
13:00:00	6.54167	535.8
13:10:00	6.54861	528.714
13:20:00	6.55556	533.817
13:30:00	6.5625	530.078
13:40:00	6.56944	540.526
13:50:00	6.57639	532.187
14:00:00	6.58333	531.698
14:10:00	6.59028	528.756
14:20:00	6.59722	532.296
14:30:00	6.60417	535.039
14:40:00	6.61111	530.259
14:50:00	6.61806	531.152
15:00:00	6.625	535.287
15:10:00	6.63194	530.858
15:20:00	6.63889	526.292
15:30:00	6.64583	534.39
15:40:00	6.65278	533.323
15:50:00	6.65972	533.934
16:00:00	6.66667	529.296
16:10:00	6.67361	529.878
16:20:00	6.68056	528.27
16:30:00	6.6875	530.176
16:40:00	6.69444	529.606
16:50:00	6.70139	524.36
17:00:00	6.70833	528.758
17:10:00	6.71528	528.124
17:20:00	6.72222	527.27
17:30:00	6.72917	527.536
17:40:00	6.73611	522.953
17:50:00	6.74306	528.738
18:00:00	6.75	527.39
18:10:00	6.75694	526.193
18:20:00	6.76389	522.64
18:30:00	6.77083	522.894
18:40:00	6.77778	519.946
18:50:00	6.78472	523.567
19:00:00	6.79167	516.349
19:10:00	6.79861	518.285
19:20:00	6.80556	521.196
19:30:00	6.8125	521.33
19:40:00	6.81944	516.896
19:50:00	6.82639	517.887
20:00:00	6.83333	512.474
20:10:00	6.84028	518.155
20:20:00	6.84722	511.187
20:30:00	6.85417	509.946
20:40:00	6.86111	509.164
20:50:00	6.86806	514.15
21:00:00	6.875	508.86
21:10:00	6.88194	506.01
21:20:00	6.88889	506.788
21:30:00	6.89583	509.577
21:40:00	6.90278	510.939
21:50:00	6.90972	504.876
22:00:00	6.91667	506.357
22:10:00	6.92361	501.455
22:20:00	6.93056	496.484
22:30:00	6.9375	498.163
22:40:00	6.94444	500.324
22:50:00	6.95139	490.866
23:00:00	6.95833	495.844
23:10:00	6.96528	489.94
23:20:00	6.97222	491.546
23:30:00	6.97917	485.463
23:40:00	6.98611	485.835
23:50:00	6.99306	486.835
00:00:00	7	485.333
00:10:00	7.00694	475.024
00:20:00	7.01389	486.106
00:30:00	7.02083	476.022
00:40:00	7.02778	481.644
00:50:00	7.03472	474.836
01:00:00	7.04167	476.383
01:10:00	7.04861	474.966
01:20:00	7.05556	471.173
01:30:00	7.0625	469.857
01:40:00	7.06944	470.448
01:50:00	7.07639	466.072
02:00:00	7.08333	471.777
02:10:00	7.09028	469.635
02:20:00	7.09722	466.178
02:30:00	7.10417	460.933
02:40:00	7.11111	460.819
02:50:00	7.11806	458.622
03:00:00	7.125	459.005
03:10:00	7.13194	458.083
03:20:00	7.13889	461.669
03:30:00	7.14583	455.06
03:40:00	7.15278	447.487

## Sheet: gcn-5KO-raw data
LumiCycle: gcn5KO-FRQ-luc (Raw)
Time (hr:min)	Time (days)	counts/sec
01:12:00	1.05	33.984
01:22:00	1.05694	33.302
01:32:00	1.06389	31.581
01:42:00	1.07083	31.695
01:52:00	1.07778	30.729
02:02:00	1.08472	31.681
02:12:00	1.09167	29.228
02:22:00	1.09861	29.604
02:32:00	1.10556	30.889
02:42:00	1.1125	27.864
02:52:00	1.11944	28.246
03:02:00	1.12639	28.932
03:12:00	1.13333	28.83
03:22:00	1.14028	26.591
03:32:00	1.14722	28.016
03:42:00	1.15417	26.28
03:52:00	1.16111	27.3
04:02:00	1.16806	26.911
04:12:00	1.175	26.525
04:22:00	1.18194	26.281
04:32:00	1.18889	25.872
04:42:00	1.19583	25.547
04:52:00	1.20278	26.443
05:02:00	1.20972	26.899
05:12:00	1.21667	26.238
05:22:00	1.22361	27.16
05:32:00	1.23056	25.34
05:42:00	1.2375	27.087
05:52:00	1.24444	26.681
06:02:00	1.25139	26.927
06:12:00	1.25833	28.235
06:22:00	1.26528	27.655
06:32:00	1.27222	29.441
06:42:00	1.27917	28.576
06:52:00	1.28611	29.005
07:02:00	1.29306	29.622
07:12:00	1.3	28.826
07:22:00	1.30694	28.554
07:32:00	1.31389	31.004
07:42:00	1.32083	29.837
07:52:00	1.32778	30.706
08:02:00	1.33472	31.151
08:12:00	1.34167	30.597
08:22:00	1.34861	32.214
08:32:00	1.35556	32.011
08:42:00	1.3625	32.398
08:52:00	1.36944	33.658
09:02:00	1.37639	32.906
09:12:00	1.38333	34.768
09:22:00	1.39028	34.573
09:32:00	1.39722	33.444
09:42:00	1.40417	36.421
09:52:00	1.41111	35.589
10:02:00	1.41806	37.028
10:12:00	1.425	37.279
10:22:00	1.43194	36.72
10:32:00	1.43889	37.673
10:42:00	1.44583	38.325
10:52:00	1.45278	37.802
11:02:00	1.45972	38.694
11:12:00	1.46667	38.332
11:22:00	1.47361	38.768
11:32:00	1.48056	39.311
11:42:00	1.4875	39.704
11:52:00	1.49444	40.212
12:02:00	1.50139	39.938
12:12:00	1.50833	40.37
12:22:00	1.51528	41.822
12:32:00	1.52222	40.428
12:42:00	1.52917	41.304
12:52:00	1.53611	41.351
13:02:00	1.54306	40.806
13:12:00	1.55	41.996
13:22:00	1.55694	41.79
13:32:00	1.56389	43.205
13:42:00	1.57083	43.371
13:52:00	1.57778	43.093
14:02:00	1.58472	43.701
14:12:00	1.59167	41.314
14:22:00	1.59861	43.15
14:32:00	1.60556	41.673
14:42:00	1.6125	43.617
14:52:00	1.61944	41.591
15:02:00	1.62639	43.722
15:12:00	1.63333	43.324
15:22:00	1.64028	43.589
15:32:00	1.64722	42.449
15:42:00	1.65417	42.41
15:52:00	1.66111	42.996
16:02:00	1.66806	42.756
16:12:00	1.675	41.664
16:22:00	1.68194	43.281
16:32:00	1.68889	42.329
16:42:00	1.69583	42.705
16:52:00	1.70278	42.43
17:02:00	1.70972	41.954
17:12:00	1.71667	42.74
17:22:00	1.72361	40.243
17:32:00	1.73056	40.373
17:42:00	1.7375	40.891
17:52:00	1.74444	40.856
18:02:00	1.75139	39.004
18:12:00	1.75833	38.966
18:22:00	1.76528	39.894
18:32:00	1.77222	39.176
18:42:00	1.77917	40.167
18:52:00	1.78611	39.499
19:02:00	1.79306	38.317
19:12:00	1.8	40.112
19:22:00	1.80694	37.464
19:32:00	1.81389	38.602
19:42:00	1.82083	38.876
19:52:00	1.82778	37.804
20:02:00	1.83472	36.302
20:12:00	1.84167	37.083
20:22:00	1.84861	36.381
20:32:00	1.85556	35.455
20:42:00	1.8625	36.562
20:52:00	1.86944	35.46
21:02:00	1.87639	35.645
21:12:00	1.88333	36.118
21:22:00	1.89028	35.009
21:32:00	1.89722	35.291
21:42:00	1.90417	33.876
21:52:00	1.91111	33.027
22:02:00	1.91806	32.789
22:12:00	1.925	33.131
22:22:00	1.93194	33.043
22:32:00	1.93889	34.089
22:42:00	1.94583	32.459
22:52:00	1.95278	32.208
23:02:00	1.95972	31.401
23:12:00	1.96667	32.866
23:22:00	1.97361	31.908
23:32:00	1.98056	31.47
23:42:00	1.9875	31.735
23:52:00	1.99444	30.348
00:02:00	2.00139	30.743
00:12:00	2.00833	32.103
00:22:00	2.01528	30.466
00:32:00	2.02222	31.394
00:42:00	2.02917	29.147
00:52:00	2.03611	28.192
01:02:00	2.04306	29.785
01:12:00	2.05	27.869
01:22:00	2.05694	29.914
01:32:00	2.06389	28.058
01:42:00	2.07083	28.645
01:52:00	2.07778	28.95
02:02:00	2.08472	28.558
02:12:00	2.09167	29.199
02:22:00	2.09861	28.761
02:32:00	2.10556	27.2
02:42:00	2.1125	27.44
02:52:00	2.11944	27.306
03:02:00	2.12639	27.77
03:12:00	2.13333	26.885
03:22:00	2.14028	27.942
03:32:00	2.14722	27.362
03:42:00	2.15417	25.967
03:52:00	2.16111	25.858
04:02:00	2.16806	27.338
04:12:00	2.175	26.741
04:22:00	2.18194	24.853
04:32:00	2.18889	24.456
04:42:00	2.19583	26.034
04:52:00	2.20278	25.959
05:02:00	2.20972	24.275
05:12:00	2.21667	26.071
05:22:00	2.22361	25.229
05:32:00	2.23056	24.198
05:42:00	2.2375	24.866
05:52:00	2.24444	24.636
06:02:00	2.25139	23.375
06:12:00	2.25833	24.285
06:22:00	2.26528	23.98
06:32:00	2.27222	23.172
06:42:00	2.27917	24.349
06:52:00	2.28611	22.943
07:02:00	2.29306	24.048
07:12:00	2.3	23.715
07:22:00	2.30694	23.294
07:32:00	2.31389	23.518
07:42:00	2.32083	23.411
07:52:00	2.32778	23.459
08:02:00	2.33472	22.687
08:12:00	2.34167	23.231
08:22:00	2.34861	22.65
08:32:00	2.35556	22.596
08:42:00	2.3625	22.152
08:52:00	2.36944	22.815
09:02:00	2.37639	22.093
09:12:00	2.38333	23.418
09:22:00	2.39028	21.509
09:32:00	2.39722	22.167
09:42:00	2.40417	23.001
09:52:00	2.41111	22.893
10:02:00	2.41806	22.65
10:12:00	2.425	22.316
10:22:00	2.43194	22.3
10:32:00	2.43889	21.353
10:42:00	2.44583	21.589
10:52:00	2.45278	22.101
11:02:00	2.45972	22.264
11:12:00	2.46667	22.605
11:22:00	2.47361	22.122
11:32:00	2.48056	21.934
11:42:00	2.4875	21.958
11:52:00	2.49444	22.421
12:02:00	2.50139	20.461
12:12:00	2.50833	21.372
12:22:00	2.51528	22.822
12:32:00	2.52222	22.548
12:42:00	2.52917	21.629
12:52:00	2.53611	22.205
13:02:00	2.54306	21.165
13:12:00	2.55	22.712
13:22:00	2.55694	20.956
13:32:00	2.56389	20.896
13:42:00	2.57083	20.512
13:52:00	2.57778	22.006
14:02:00	2.58472	21.742
14:12:00	2.59167	21.693
14:22:00	2.59861	22.014
14:32:00	2.60556	22.218
14:42:00	2.6125	20.899
14:52:00	2.61944	20.968
15:02:00	2.62639	19.559
15:12:00	2.63333	21.47
15:22:00	2.64028	20.853
15:32:00	2.64722	20.018
15:42:00	2.65417	21.489
15:52:00	2.66111	20.79
16:02:00	2.66806	19.77
16:12:00	2.675	20.206
16:22:00	2.68194	19.951
16:32:00	2.68889	19.794
16:42:00	2.69583	20.359
16:52:00	2.70278	20.336
17:02:00	2.70972	20.875
17:12:00	2.71667	21.061
17:22:00	2.72361	20.87
17:32:00	2.73056	20.6
17:42:00	2.7375	19.615
17:52:00	2.74444	19.801
18:02:00	2.75139	19.836
18:12:00	2.75833	19.759
18:22:00	2.76528	20.094
18:32:00	2.77222	18.43
18:42:00	2.77917	20.168
18:52:00	2.78611	20.023
19:02:00	2.79306	20.14
19:12:00	2.8	19.846
19:22:00	2.80694	20.171
19:32:00	2.81389	19.749
19:42:00	2.82083	20.32
19:52:00	2.82778	19.682
20:02:00	2.83472	19.545
20:12:00	2.84167	19.013
20:22:00	2.84861	18.549
20:32:00	2.85556	19.67
20:42:00	2.8625	18.6
20:52:00	2.86944	20.71
21:02:00	2.87639	19.115
21:12:00	2.88333	19.77
21:22:00	2.89028	19.538
21:32:00	2.89722	19.814
21:42:00	2.90417	18.304
21:52:00	2.91111	19.031
22:02:00	2.91806	19.591
22:12:00	2.925	18.33
22:22:00	2.93194	18.807
22:32:00	2.93889	18.94
22:42:00	2.94583	19.266
22:52:00	2.95278	19.985
23:02:00	2.95972	18.703
23:12:00	2.96667	19.423
23:22:00	2.97361	19.42
23:32:00	2.98056	19.804
23:42:00	2.9875	19.178
23:52:00	2.99444	19.746
00:02:00	3.00139	19.372
00:12:00	3.00833	19.118
00:22:00	3.01528	18.753
00:32:00	3.02222	19.946
00:42:00	3.02917	18.756
00:52:00	3.03611	19.696
01:02:00	3.04306	19.062
01:12:00	3.05	19.304
01:22:00	3.05694	19.037
01:32:00	3.06389	18.396
01:42:00	3.07083	18.928
01:52:00	3.07778	19.599
02:02:00	3.08472	20.18
02:12:00	3.09167	19.51
02:22:00	3.09861	19.809
02:32:00	3.10556	18.517
02:42:00	3.1125	18.404
02:52:00	3.11944	19.515
03:02:00	3.12639	19.794
03:12:00	3.13333	19.391
03:22:00	3.14028	20.343
03:32:00	3.14722	20.63
03:42:00	3.15417	20.274
03:52:00	3.16111	19.493
04:02:00	3.16806	18.673
04:12:00	3.175	19.093
04:22:00	3.18194	19.611
04:32:00	3.18889	19.858
04:42:00	3.19583	19.044
04:52:00	3.20278	19.179
05:02:00	3.20972	19.233
05:12:00	3.21667	19.414
05:22:00	3.22361	19.295
05:32:00	3.23056	20.529
05:42:00	3.2375	18.198
05:52:00	3.24444	19.971
06:02:00	3.25139	19.596
06:12:00	3.25833	19.687
06:22:00	3.26528	19.901
06:32:00	3.27222	19.555
06:42:00	3.27917	19.81
06:52:00	3.28611	18.816
07:02:00	3.29306	20.163
07:12:00	3.3	20.176
07:22:00	3.30694	19.204
07:32:00	3.31389	18.647
07:42:00	3.32083	19.641
07:52:00	3.32778	19.669
08:02:00	3.33472	19.213
08:12:00	3.34167	19.623
08:22:00	3.34861	19.661
08:32:00	3.35556	19.807
08:42:00	3.3625	18.82
08:52:00	3.36944	19.181
09:02:00	3.37639	18.954
09:12:00	3.38333	19.208
09:22:00	3.39028	19.616
09:32:00	3.39722	19.389
09:42:00	3.40417	19.381
09:52:00	3.41111	20.409
10:02:00	3.41806	18.896
10:12:00	3.425	19.676
10:22:00	3.43194	19.393
10:32:00	3.43889	20.02
10:42:00	3.44583	20.065
10:52:00	3.45278	18.853
11:02:00	3.45972	19.415
11:12:00	3.46667	19.558
11:22:00	3.47361	20.233
11:32:00	3.48056	19.468
11:42:00	3.4875	19.853
11:52:00	3.49444	19.881
12:02:00	3.50139	21.023
12:12:00	3.50833	20.289
12:22:00	3.51528	19.844
12:32:00	3.52222	20.692
12:42:00	3.52917	20.779
12:52:00	3.53611	20.017
13:02:00	3.54306	19.764
13:12:00	3.55	20.418
13:22:00	3.55694	20.705
13:32:00	3.56389	20.13
13:42:00	3.57083	20.097
13:52:00	3.57778	20.075
14:02:00	3.58472	20.665
14:12:00	3.59167	20.617
14:22:00	3.59861	21.038
14:32:00	3.60556	22.543
14:42:00	3.6125	21.368
14:52:00	3.61944	21.764
15:02:00	3.62639	20.477
15:12:00	3.63333	20.163
15:22:00	3.64028	20.797
15:32:00	3.64722	20.876
15:42:00	3.65417	20.793
15:52:00	3.66111	19.783
16:02:00	3.66806	20.525
16:12:00	3.675	21.83
16:22:00	3.68194	21.209
16:32:00	3.68889	20.993
16:42:00	3.69583	21.57
16:52:00	3.70278	21.413
17:02:00	3.70972	21.085
17:12:00	3.71667	20.748
17:22:00	3.72361	22.303
17:32:00	3.73056	20.659
17:42:00	3.7375	21.914
17:52:00	3.74444	19.947
18:02:00	3.75139	21.851
18:12:00	3.75833	21.599
18:22:00	3.76528	21.614
18:32:00	3.77222	21.281
18:42:00	3.77917	21.356
18:52:00	3.78611	21.113
19:02:00	3.79306	21.229
19:12:00	3.8	21.424
19:22:00	3.80694	22.588
19:32:00	3.81389	21.842
19:42:00	3.82083	22.47
19:52:00	3.82778	22.817
20:02:00	3.83472	21.534
20:12:00	3.84167	21.519
20:22:00	3.84861	20.865
20:32:00	3.85556	22.079
20:42:00	3.8625	21.751
20:52:00	3.86944	22.593
21:02:00	3.87639	20.612
21:12:00	3.88333	21.6
21:22:00	3.89028	22.552
21:32:00	3.89722	21.217
21:42:00	3.90417	22.229
21:52:00	3.91111	21.797
22:02:00	3.91806	22.1
22:12:00	3.925	21.371
22:22:00	3.93194	21.017
22:32:00	3.93889	21.556
22:42:00	3.94583	22.624
22:52:00	3.95278	23.115
23:02:00	3.95972	21.906
23:12:00	3.96667	23.244
23:22:00	3.97361	22.617
23:32:00	3.98056	22.707
23:42:00	3.9875	21.877
23:52:00	3.99444	22.292
00:02:00	4.00139	22.476
00:12:00	4.00833	21.892
00:22:00	4.01528	22.63
00:32:00	4.02222	23.747
00:42:00	4.02917	22.959
00:52:00	4.03611	22.676
01:02:00	4.04306	22.55
01:12:00	4.05	24.152
01:22:00	4.05694	22.517
01:32:00	4.06389	21.559
01:42:00	4.07083	23.085
01:52:00	4.07778	22.249
02:02:00	4.08472	23.49
02:12:00	4.09167	22.729
02:22:00	4.09861	22.857
02:32:00	4.10556	22.362
02:42:00	4.1125	23.054
02:52:00	4.11944	23.041
03:02:00	4.12639	24.191
03:12:00	4.13333	23.471
03:22:00	4.14028	22.864
03:32:00	4.14722	22.787
03:42:00	4.15417	22.923
03:52:00	4.16111	23.337
04:02:00	4.16806	24.084
04:12:00	4.175	24.636
04:22:00	4.18194	23.443
04:32:00	4.18889	24.568
04:42:00	4.19583	22.595
04:52:00	4.20278	24.083
05:02:00	4.20972	25
05:12:00	4.21667	24.707
05:22:00	4.22361	23.439
05:32:00	4.23056	23.699
05:42:00	4.2375	23.861
05:52:00	4.24444	24.083
06:02:00	4.25139	24.92
06:12:00	4.25833	23.664
06:22:00	4.26528	25.444
06:32:00	4.27222	23.571
06:42:00	4.27917	22.735
06:52:00	4.28611	25.345
07:02:00	4.29306	25.719
07:12:00	4.3	24.113
07:22:00	4.30694	23.956
07:32:00	4.31389	24.929
07:42:00	4.32083	25.131
07:52:00	4.32778	25.027
08:02:00	4.33472	23.759
08:12:00	4.34167	25.349
08:22:00	4.34861	25.251
08:32:00	4.35556	25.251
08:42:00	4.3625	25.192
08:52:00	4.36944	24.963
09:02:00	4.37639	25.357
09:12:00	4.38333	24.899
09:22:00	4.39028	24.922
09:32:00	4.39722	24.721
09:42:00	4.40417	23.818
09:52:00	4.41111	25.059
10:02:00	4.41806	24.904
10:12:00	4.425	24.77
10:22:00	4.43194	25.876
10:32:00	4.43889	24.051
10:42:00	4.44583	25.541
10:52:00	4.45278	26.178
11:02:00	4.45972	25.502
11:12:00	4.46667	25.012
11:22:00	4.47361	26.036
11:32:00	4.48056	26.021
11:42:00	4.4875	25.343
11:52:00	4.49444	25.934
12:02:00	4.50139	26.498
12:12:00	4.50833	24.578
12:22:00	4.51528	25.32
12:32:00	4.52222	26.358
12:42:00	4.52917	25.315
12:52:00	4.53611	26.083
13:02:00	4.54306	26.517
13:12:00	4.55	26.517
13:22:00	4.55694	27.119
13:32:00	4.56389	26.447
13:42:00	4.57083	25.83
13:52:00	4.57778	27.237
14:02:00	4.58472	26.097
14:12:00	4.59167	26.304
14:22:00	4.59861	27.258
14:32:00	4.60556	26.046
14:42:00	4.6125	26.686
14:52:00	4.61944	26.567
15:02:00	4.62639	26.081
15:12:00	4.63333	26.618
15:22:00	4.64028	27.429
15:32:00	4.64722	27.181
15:42:00	4.65417	26.986
15:52:00	4.66111	25.404
16:02:00	4.66806	25.667
16:12:00	4.675	26.881
16:22:00	4.68194	26.271
16:32:00	4.68889	26.473
16:42:00	4.69583	25.583
16:52:00	4.70278	26.016
17:02:00	4.70972	27.44
17:12:00	4.71667	27.487
17:22:00	4.72361	28.369
17:32:00	4.73056	27.001
17:42:00	4.7375	26.715
17:52:00	4.74444	27.092
18:02:00	4.75139	26.478
18:12:00	4.75833	27.1
18:22:00	4.76528	25.445
18:32:00	4.77222	27.833
18:42:00	4.77917	27.395
18:52:00	4.78611	28.004
19:02:00	4.79306	26.813
19:12:00	4.8	26.815
19:22:00	4.80694	26.411
19:32:00	4.81389	27.365
19:42:00	4.82083	27.148
19:52:00	4.82778	26.729
20:02:00	4.83472	27.291
20:12:00	4.84167	25.979
20:22:00	4.84861	26.997
20:32:00	4.85556	26.537
20:42:00	4.8625	27.858
20:52:00	4.86944	27.142
21:02:00	4.87639	27.455
21:12:00	4.88333	27.44
21:22:00	4.89028	27.046
21:32:00	4.89722	26.742
21:42:00	4.90417	29.072
21:52:00	4.91111	26.524
22:02:00	4.91806	28.411
22:12:00	4.925	26.821
22:22:00	4.93194	28.127
22:32:00	4.93889	27.884
22:42:00	4.94583	26.867
22:52:00	4.95278	27.053
23:02:00	4.95972	27.268
23:12:00	4.96667	27.773
23:22:00	4.97361	26.762
23:32:00	4.98056	27.989
23:42:00	4.9875	27.854
23:52:00	4.99444	28.511
00:02:00	5.00139	27.399
00:12:00	5.00833	27.119
00:22:00	5.01528	28.194
00:32:00	5.02222	28.351
00:42:00	5.02917	27.534
00:52:00	5.03611	28.464
01:02:00	5.04306	27.168
01:12:00	5.05	28.055
01:22:00	5.05694	29.037
01:32:00	5.06389	28.351
01:42:00	5.07083	27.082
01:52:00	5.07778	27.99
02:02:00	5.08472	27.485
02:12:00	5.09167	27.862
02:22:00	5.09861	28.489
02:32:00	5.10556	28.423
02:42:00	5.1125	28.77
02:52:00	5.11944	28.57
03:02:00	5.12639	27.831
03:12:00	5.13333	29.131
03:22:00	5.14028	28.444
03:32:00	5.14722	27.687
03:42:00	5.15417	29.539
03:52:00	5.16111	28.692
04:02:00	5.16806	27.91
04:12:00	5.175	28.575
04:22:00	5.18194	29.022
04:32:00	5.18889	29.222
04:42:00	5.19583	28.587
04:52:00	5.20278	28.961
05:02:00	5.20972	28.483
05:12:00	5.21667	29.563
05:22:00	5.22361	30.294
05:32:00	5.23056	29.104
05:42:00	5.2375	28.912
05:52:00	5.24444	26.945
06:02:00	5.25139	29.244
06:12:00	5.25833	28.825
06:22:00	5.26528	29.73
06:32:00	5.27222	28.816
06:42:00	5.27917	28.046
06:52:00	5.28611	28.173
07:02:00	5.29306	28.618
07:12:00	5.3	28.493
07:22:00	5.30694	30.106
07:32:00	5.31389	29.327
07:42:00	5.32083	29.192
07:52:00	5.32778	29.817
08:02:00	5.33472	29.153
08:12:00	5.34167	30.1
08:22:00	5.34861	29.324
08:32:00	5.35556	29.251
08:42:00	5.3625	30.181
08:52:00	5.36944	30.109
09:02:00	5.37639	27.94
09:12:00	5.38333	29.988
09:22:00	5.39028	29.547
09:32:00	5.39722	27.623
09:42:00	5.40417	29.917
09:52:00	5.41111	28.082
10:02:00	5.41806	28.953
10:12:00	5.425	29.82
10:22:00	5.43194	29.49
10:32:00	5.43889	29.204
10:42:00	5.44583	29.513
10:52:00	5.45278	29.451
11:02:00	5.45972	29.691
11:12:00	5.46667	28.258
11:22:00	5.47361	29.269
11:32:00	5.48056	29.221
11:42:00	5.4875	28.159
11:52:00	5.49444	29.166
12:02:00	5.50139	28.616
12:12:00	5.50833	26.686
12:22:00	5.51528	28.933
12:32:00	5.52222	28.972
12:42:00	5.52917	27.852
12:52:00	5.53611	29.263
13:02:00	5.54306	28.629
13:12:00	5.55	28.231
13:22:00	5.55694	28.369
13:32:00	5.56389	29.114
13:42:00	5.57083	29.278
13:52:00	5.57778	28.812
14:02:00	5.58472	29.915
14:12:00	5.59167	29.577
14:22:00	5.59861	29.372
14:32:00	5.60556	28.438
14:42:00	5.6125	28.64
14:52:00	5.61944	28.837
15:02:00	5.62639	29.495
15:12:00	5.63333	28.385
15:22:00	5.64028	28.669
15:32:00	5.64722	28.911
15:42:00	5.65417	27.449
15:52:00	5.66111	28.793
16:02:00	5.66806	29.103
16:12:00	5.675	27.476
16:22:00	5.68194	27.041
16:32:00	5.68889	28.57
16:42:00	5.69583	30.045
16:52:00	5.70278	29.06
17:02:00	5.70972	29.536
17:12:00	5.71667	28.329
17:22:00	5.72361	28.258
17:32:00	5.73056	30.382
17:42:00	5.7375	27.209
17:52:00	5.74444	29.596
18:02:00	5.75139	29.569
18:12:00	5.75833	28.094
18:22:00	5.76528	28.55
18:32:00	5.77222	29.818
18:42:00	5.77917	29.008
18:52:00	5.78611	27.957
19:02:00	5.79306	29.097
19:12:00	5.8	28.464
19:22:00	5.80694	29.317
19:32:00	5.81389	28.774
19:42:00	5.82083	29.406
19:52:00	5.82778	28.362
20:02:00	5.83472	27.271
20:12:00	5.84167	27.851
20:22:00	5.84861	29.26
20:32:00	5.85556	28.249
20:42:00	5.8625	29.433
20:52:00	5.86944	28.662
21:02:00	5.87639	29.021
21:12:00	5.88333	28.006
21:22:00	5.89028	27.94
21:32:00	5.89722	27.588
21:42:00	5.90417	28.313
21:52:00	5.91111	28.494
22:02:00	5.91806	29.404
22:12:00	5.925	28.727
22:22:00	5.93194	28.023
22:32:00	5.93889	27.451
22:42:00	5.94583	28.075
22:52:00	5.95278	28.445
23:02:00	5.95972	27.685
23:12:00	5.96667	27.576
23:22:00	5.97361	29.611
23:32:00	5.98056	27.745
23:42:00	5.9875	27.902
23:52:00	5.99444	26.253
00:02:00	6.00139	28.989
00:12:00	6.00833	28.544
00:22:00	6.01528	28.468
00:32:00	6.02222	27.993
00:42:00	6.02917	27.332
00:52:00	6.03611	28.25
01:02:00	6.04306	28.97
01:12:00	6.05	27.133
01:22:00	6.05694	28.127
01:32:00	6.06389	27.829
01:42:00	6.07083	27.451
01:52:00	6.07778	27.168
02:02:00	6.08472	27.145
02:12:00	6.09167	26.832
02:22:00	6.09861	27.095
02:32:00	6.10556	27.694
02:42:00	6.1125	27.505
02:52:00	6.11944	27.104
03:02:00	6.12639	27.919
03:12:00	6.13333	26.886
03:22:00	6.14028	27.7
03:32:00	6.14722	26.923
03:42:00	6.15417	26.654
03:52:00	6.16111	26.857
04:02:00	6.16806	26.425
04:12:00	6.175	26.854
04:22:00	6.18194	27.358
04:32:00	6.18889	26.972
04:42:00	6.19583	27.396
04:52:00	6.20278	25.584
05:02:00	6.20972	27.456
05:12:00	6.21667	26.704
05:22:00	6.22361	26.546
05:32:00	6.23056	26.71
05:42:00	6.2375	27.365
05:52:00	6.24444	26.457
06:02:00	6.25139	27.046
06:12:00	6.25833	26.362
06:22:00	6.26528	26.597
06:32:00	6.27222	26.588
06:42:00	6.27917	26.62
06:52:00	6.28611	25.694
07:02:00	6.29306	26.279
07:12:00	6.3	25.898
07:22:00	6.30694	27.858
07:32:00	6.31389	26.228
07:42:00	6.32083	25.166
07:52:00	6.32778	25.491
08:02:00	6.33472	26.117
08:12:00	6.34167	25.288
08:22:00	6.34861	26.519
08:32:00	6.35556	27.273
08:42:00	6.3625	25.706
08:52:00	6.36944	27.466
09:02:00	6.37639	26.512
09:12:00	6.38333	24.637
09:22:00	6.39028	26.284
09:32:00	6.39722	25.347
09:42:00	6.40417	25.796
09:52:00	6.41111	24.563
10:02:00	6.41806	26.747
10:12:00	6.425	26.564
10:22:00	6.43194	25.26
10:32:00	6.43889	26.005
10:42:00	6.44583	27.41
10:52:00	6.45278	25.308
11:02:00	6.45972	26.289
11:12:00	6.46667	25.322
11:22:00	6.47361	26.336
11:32:00	6.48056	26.706
11:42:00	6.4875	25.738
11:52:00	6.49444	26.144
12:02:00	6.50139	24.357
12:12:00	6.50833	26.845
12:22:00	6.51528	25.359
12:32:00	6.52222	24.473
12:42:00	6.52917	23.83
12:52:00	6.53611	27.077
13:02:00	6.54306	25.858
13:12:00	6.55	25.49
13:22:00	6.55694	25.603
13:32:00	6.56389	25.49
13:42:00	6.57083	26.612
13:52:00	6.57778	25.411
14:02:00	6.58472	25.544
14:12:00	6.59167	25.192
14:22:00	6.59861	25.196
14:32:00	6.60556	25.476
14:42:00	6.6125	25.582
14:52:00	6.61944	26.598
15:02:00	6.62639	26.151
15:12:00	6.63333	25.387
15:22:00	6.64028	25.027
15:32:00	6.64722	26.601
15:42:00	6.65417	24.293
15:52:00	6.66111	24.054
16:02:00	6.66806	26.227
16:12:00	6.675	25.344
16:22:00	6.68194	25.921
16:32:00	6.68889	25.618
16:42:00	6.69583	25.523
16:52:00	6.70278	25.539
17:02:00	6.70972	24.922
17:12:00	6.71667	24.683
17:22:00	6.72361	25.303
17:32:00	6.73056	25.88
17:42:00	6.7375	25.423
17:52:00	6.74444	25.095
18:02:00	6.75139	26.643
18:12:00	6.75833	24.528
18:22:00	6.76528	24.125
18:32:00	6.77222	25.691
18:42:00	6.77917	24.509
18:52:00	6.78611	25.779
19:02:00	6.79306	24.652
19:12:00	6.8	24.335
19:22:00	6.80694	25.931
19:32:00	6.81389	24.929
19:42:00	6.82083	24.368
19:52:00	6.82778	24.435
20:02:00	6.83472	25.049
20:12:00	6.84167	24.368
20:22:00	6.84861	24.068
20:32:00	6.85556	25.593
20:42:00	6.8625	24.207
20:52:00	6.86944	24.723
21:02:00	6.87639	25.107
21:12:00	6.88333	24.822
21:22:00	6.89028	25.075
21:32:00	6.89722	25.053
21:42:00	6.90417	24.956
21:52:00	6.91111	23.982
22:02:00	6.91806	25.248
22:12:00	6.925	24.512
22:22:00	6.93194	25.325
22:32:00	6.93889	24.696
22:42:00	6.94583	25.921
22:52:00	6.95278	23.858
23:02:00	6.95972	25.063
23:12:00	6.96667	24.773
23:22:00	6.97361	23.476
23:32:00	6.98056	24.356
23:42:00	6.9875	23.832
23:52:00	6.99444	24.888
00:02:00	7.00139	22.61
00:12:00	7.00833	25.098
00:22:00	7.01528	24.776
00:32:00	7.02222	23.926
00:42:00	7.02917	24.861
00:52:00	7.03611	23.422
01:02:00	7.04306	23.647
01:12:00	7.05	24.073
01:22:00	7.05694	24.405
01:32:00	7.06389	24.755
01:42:00	7.07083	24.165
01:52:00	7.07778	23.026
02:02:00	7.08472	23.645
02:12:00	7.09167	24.817
02:22:00	7.09861	24.982
02:32:00	7.10556	23.304
02:42:00	7.1125	24.676
02:52:00	7.11944	24.211
03:02:00	7.12639	23.381
03:12:00	7.13333	24.538
03:22:00	7.14028	23.277
03:32:00	7.14722	22.559
