# Supplementary material for: The nutrient-sensing GCN2 signaling pathway is essential for circadian clock function by regulating histone acetylation under amino acid starvation
Source: eLife journal article supplement (doi:10.7554/elife.85241), 2023-04-21
Supplement: fig5-figsupp1-data2 [file Figure 5-figure supplement 1-source data 2.xlsx]

## Sheet: WT-raw data
LumiCycle: WT-FRQ-luc (Raw)
Time (hr:min)	Time (days)	counts/sec
01:11:00	1.04931	220.71
01:21:00	1.05625	218.578
01:31:00	1.06319	218.578
01:41:00	1.07014	220.221
01:51:00	1.07708	221.558
02:01:00	1.08403	221.943
02:11:00	1.09097	221.889
02:21:00	1.09792	222.764
02:31:00	1.10486	223.345
02:41:00	1.11181	226.819
02:51:00	1.11875	230.117
03:01:00	1.12569	229.209
03:11:00	1.13264	232.2
03:21:00	1.13958	238.845
03:31:00	1.14653	239.668
03:41:00	1.15347	239.036
03:51:00	1.16042	248.156
04:01:00	1.16736	244.215
04:11:00	1.17431	252.578
04:21:00	1.18125	254.248
04:31:00	1.18819	258.645
04:41:00	1.19514	262.71
04:51:00	1.20208	263.412
05:01:00	1.20903	267.679
05:11:00	1.21597	271.273
05:21:00	1.22292	277.816
05:31:00	1.22986	278.759
05:41:00	1.23681	282.444
05:51:00	1.24375	286.885
06:01:00	1.25069	290.149
06:11:00	1.25764	289.349
06:21:00	1.26458	296.302
06:31:00	1.27153	299.237
06:41:00	1.27847	300.902
06:51:00	1.28542	306.525
07:01:00	1.29236	315.707
07:11:00	1.29931	316.997
07:21:00	1.30625	320.79
07:31:00	1.31319	324.868
07:41:00	1.32014	319.525
07:51:00	1.32708	329.491
08:01:00	1.33403	332.799
08:11:00	1.34097	340.123
08:21:00	1.34792	341.677
08:31:00	1.35486	341.67
08:41:00	1.36181	347.963
08:51:00	1.36875	351.998
09:01:00	1.37569	348.364
09:11:00	1.38264	357.025
09:21:00	1.38958	357.559
09:31:00	1.39653	358.533
09:41:00	1.40347	363.064
09:51:00	1.41042	363.999
10:01:00	1.41736	364.637
10:11:00	1.42431	373.514
10:21:00	1.43125	373.222
10:31:00	1.43819	375.839
10:41:00	1.44514	379.716
10:51:00	1.45208	375.958
11:01:00	1.45903	378.025
11:11:00	1.46597	378.391
11:21:00	1.47292	380.74
11:31:00	1.47986	379.581
11:41:00	1.48681	375.343
11:51:00	1.49375	383.48
12:01:00	1.50069	380.869
12:11:00	1.50764	374.637
12:21:00	1.51458	374.513
12:31:00	1.52153	376.393
12:41:00	1.52847	376.572
12:51:00	1.53542	374.444
13:01:00	1.54236	371.777
13:11:00	1.54931	368.82
13:21:00	1.55625	367.712
13:31:00	1.56319	368.829
13:41:00	1.57014	363.358
13:51:00	1.57708	361.31
14:01:00	1.58403	359.595
14:11:00	1.59097	358.235
14:21:00	1.59792	350.294
14:31:00	1.60486	353.165
14:41:00	1.61181	349.207
14:51:00	1.61875	349.462
15:01:00	1.62569	343.911
15:11:00	1.63264	340.514
15:21:00	1.63958	338.468
15:31:00	1.64653	337.07
15:41:00	1.65347	334.555
15:51:00	1.66042	328.389
16:01:00	1.66736	325.133
16:11:00	1.67431	321.69
16:21:00	1.68125	318.823
16:31:00	1.68819	313.919
16:41:00	1.69514	311.849
16:51:00	1.70208	307.525
17:01:00	1.70903	307.652
17:11:00	1.71597	303.81
17:21:00	1.72292	299.469
17:31:00	1.72986	298.339
17:41:00	1.73681	294.466
17:51:00	1.74375	290.195
18:01:00	1.75069	294.858
18:11:00	1.75764	289.379
18:21:00	1.76458	286.001
18:31:00	1.77153	283.661
18:41:00	1.77847	272.848
18:51:00	1.78542	273.132
19:01:00	1.79236	273.51
19:11:00	1.79931	269.362
19:21:00	1.80625	264.532
19:31:00	1.81319	261.76
19:41:00	1.82014	261.202
19:51:00	1.82708	259.766
20:01:00	1.83403	260.552
20:11:00	1.84097	253.342
20:21:00	1.84792	255.073
20:31:00	1.85486	252.525
20:41:00	1.86181	250.603
20:51:00	1.86875	250.787
21:01:00	1.87569	247.156
21:11:00	1.88264	246.068
21:21:00	1.88958	242.287
21:31:00	1.89653	240.086
21:41:00	1.90347	242.509
21:51:00	1.91042	238.577
22:01:00	1.91736	241.287
22:11:00	1.92431	236.701
22:21:00	1.93125	240.196
22:31:00	1.93819	238.078
22:41:00	1.94514	234.981
22:51:00	1.95208	235.802
23:01:00	1.95903	238.047
23:11:00	1.96597	233.179
23:21:00	1.97292	233.482
23:31:00	1.97986	235.61
23:41:00	1.98681	237.331
23:51:00	1.99375	235.975
00:01:00	2.00069	238.381
00:11:00	2.00764	239.296
00:21:00	2.01458	238.747
00:31:00	2.02153	237.297
00:41:00	2.02847	239.901
00:51:00	2.03542	242.597
01:01:00	2.04236	238.112
01:11:00	2.04931	246.716
01:21:00	2.05625	247.43
01:31:00	2.06319	244.756
01:41:00	2.07014	251.314
01:51:00	2.07708	250.714
02:01:00	2.08403	255.14
02:11:00	2.09097	255.809
02:21:00	2.09792	260.012
02:31:00	2.10486	261.857
02:41:00	2.11181	264.145
02:51:00	2.11875	265.954
03:01:00	2.12569	264.791
03:11:00	2.13264	273.943
03:21:00	2.13958	276.991
03:31:00	2.14653	278.24
03:41:00	2.15347	277.885
03:51:00	2.16042	282.873
04:01:00	2.16736	282.12
04:11:00	2.17431	285.813
04:21:00	2.18125	289.25
04:31:00	2.18819	292.251
04:41:00	2.19514	295.607
04:51:00	2.20208	297.781
05:01:00	2.20903	297.899
05:11:00	2.21597	304.26
05:21:00	2.22292	303.877
05:31:00	2.22986	308.46
05:41:00	2.23681	315.203
05:51:00	2.24375	314.546
06:01:00	2.25069	314.26
06:11:00	2.25764	316.471
06:21:00	2.26458	319.314
06:31:00	2.27153	320.047
06:41:00	2.27847	324.854
06:51:00	2.28542	325.485
07:01:00	2.29236	327.442
07:11:00	2.29931	333.964
07:21:00	2.30625	334.796
07:31:00	2.31319	337.057
07:41:00	2.32014	338.882
07:51:00	2.32708	340.458
08:01:00	2.33403	340.647
08:11:00	2.34097	345.471
08:21:00	2.34792	347.118
08:31:00	2.35486	348.687
08:41:00	2.36181	351.694
08:51:00	2.36875	347.582
09:01:00	2.37569	349.424
09:11:00	2.38264	350.584
09:21:00	2.38958	349.749
09:31:00	2.39653	358.467
09:41:00	2.40347	359.141
09:51:00	2.41042	358.398
10:01:00	2.41736	354.639
10:11:00	2.42431	354.481
10:21:00	2.43125	353.685
10:31:00	2.43819	355.011
10:41:00	2.44514	352.636
10:51:00	2.45208	353.537
11:01:00	2.45903	354.914
11:11:00	2.46597	354.379
11:21:00	2.47292	354.493
11:31:00	2.47986	356.435
11:41:00	2.48681	357.408
11:51:00	2.49375	350.645
12:01:00	2.50069	349.314
12:11:00	2.50764	350.343
12:21:00	2.51458	349.967
12:31:00	2.52153	348.089
12:41:00	2.52847	346.518
12:51:00	2.53542	345.328
13:01:00	2.54236	343.77
13:11:00	2.54931	346.335
13:21:00	2.55625	338.97
13:31:00	2.56319	340.307
13:41:00	2.57014	338.348
13:51:00	2.57708	338.737
14:01:00	2.58403	335.441
14:11:00	2.59097	334.113
14:21:00	2.59792	331.941
14:31:00	2.60486	329.801
14:41:00	2.61181	324.843
14:51:00	2.61875	324.161
15:01:00	2.62569	322.583
15:11:00	2.63264	320.241
15:21:00	2.63958	315.325
15:31:00	2.64653	314.645
15:41:00	2.65347	313.198
15:51:00	2.66042	311.505
16:01:00	2.66736	306.937
16:11:00	2.67431	304.695
16:21:00	2.68125	301.496
16:31:00	2.68819	304.597
16:41:00	2.69514	301.465
16:51:00	2.70208	300.848
17:01:00	2.70903	297.505
17:11:00	2.71597	298.867
17:21:00	2.72292	294.496
17:31:00	2.72986	295.592
17:41:00	2.73681	292.281
17:51:00	2.74375	287.494
18:01:00	2.75069	286.044
18:11:00	2.75764	283.465
18:21:00	2.76458	290.021
18:31:00	2.77153	284.101
18:41:00	2.77847	279.844
18:51:00	2.78542	274.362
19:01:00	2.79236	280.819
19:11:00	2.79931	276.197
19:21:00	2.80625	274.809
19:31:00	2.81319	272.933
19:41:00	2.82014	273.258
19:51:00	2.82708	272.639
20:01:00	2.83403	268.217
20:11:00	2.84097	267.835
20:21:00	2.84792	271.648
20:31:00	2.85486	267.508
20:41:00	2.86181	269.47
20:51:00	2.86875	265.884
21:01:00	2.87569	268.646
21:11:00	2.88264	266.809
21:21:00	2.88958	270.694
21:31:00	2.89653	266.451
21:41:00	2.90347	268.732
21:51:00	2.91042	267.821
22:01:00	2.91736	263.445
22:11:00	2.92431	262.998
22:21:00	2.93125	266.614
22:31:00	2.93819	265.308
22:41:00	2.94514	266.699
22:51:00	2.95208	266.768
23:01:00	2.95903	264.737
23:11:00	2.96597	264.348
23:21:00	2.97292	267.03
23:31:00	2.97986	269.532
23:41:00	2.98681	271.572
23:51:00	2.99375	269.975
00:01:00	3.00069	273.235
00:11:00	3.00764	271.256
00:21:00	3.01458	272.74
00:31:00	3.02153	273.284
00:41:00	3.02847	278.775
00:51:00	3.03542	277.432
01:01:00	3.04236	275.086
01:11:00	3.04931	276.483
01:21:00	3.05625	275.976
01:31:00	3.06319	280.938
01:41:00	3.07014	282.895
01:51:00	3.07708	283.047
02:01:00	3.08403	284.088
02:11:00	3.09097	285.072
02:21:00	3.09792	283.264
02:31:00	3.10486	288.984
02:41:00	3.11181	292.749
02:51:00	3.11875	292.141
03:01:00	3.12569	292.7
03:11:00	3.13264	292.974
03:21:00	3.13958	297.057
03:31:00	3.14653	296.403
03:41:00	3.15347	299.577
03:51:00	3.16042	297.864
04:01:00	3.16736	300.926
04:11:00	3.17431	304.486
04:21:00	3.18125	300.991
04:31:00	3.18819	303.128
04:41:00	3.19514	304.27
04:51:00	3.20208	304.944
05:01:00	3.20903	307.841
05:11:00	3.21597	308.818
05:21:00	3.22292	309.785
05:31:00	3.22986	311.712
05:41:00	3.23681	312.046
05:51:00	3.24375	315.79
06:01:00	3.25069	311.089
06:11:00	3.25764	312.472
06:21:00	3.26458	314.454
06:31:00	3.27153	318.071
06:41:00	3.27847	316.599
06:51:00	3.28542	313.686
07:01:00	3.29236	316.491
07:11:00	3.29931	317.212
07:21:00	3.30625	318.275
07:31:00	3.31319	321.617
07:41:00	3.32014	317.505
07:51:00	3.32708	320.567
08:01:00	3.33403	316.517
08:11:00	3.34097	318.148
08:21:00	3.34792	318.438
08:31:00	3.35486	318.268
08:41:00	3.36181	316.313
08:51:00	3.36875	315.472
09:01:00	3.37569	317.071
09:11:00	3.38264	315.807
09:21:00	3.38958	315.765
09:31:00	3.39653	319.057
09:41:00	3.40347	314.653
09:51:00	3.41042	316.627
10:01:00	3.41736	315.481
10:11:00	3.42431	313.939
10:21:00	3.43125	312.28
10:31:00	3.43819	313.681
10:41:00	3.44514	309.402
10:51:00	3.45208	310.738
11:01:00	3.45903	310.668
11:11:00	3.46597	311.549
11:21:00	3.47292	309.469
11:31:00	3.47986	308.16
11:41:00	3.48681	308.654
11:51:00	3.49375	304.76
12:01:00	3.50069	306.106
12:11:00	3.50764	304.717
12:21:00	3.51458	298.241
12:31:00	3.52153	298.387
12:41:00	3.52847	301.738
12:51:00	3.53542	301.822
13:01:00	3.54236	297.083
13:11:00	3.54931	297.066
13:21:00	3.55625	291.356
13:31:00	3.56319	293.654
13:41:00	3.57014	291.139
13:51:00	3.57708	292.674
14:01:00	3.58403	287.026
14:11:00	3.59097	285.69
14:21:00	3.59792	282.671
14:31:00	3.60486	285.176
14:41:00	3.61181	281.447
14:51:00	3.61875	280.878
15:01:00	3.62569	279.454
15:11:00	3.63264	280.66
15:21:00	3.63958	279.638
15:31:00	3.64653	273.74
15:41:00	3.65347	268.999
15:51:00	3.66042	274.734
16:01:00	3.66736	272.234
16:11:00	3.67431	270.278
16:21:00	3.68125	269.706
16:31:00	3.68819	261.189
16:41:00	3.69514	266.16
16:51:00	3.70208	265.088
17:01:00	3.70903	261.564
17:11:00	3.71597	264.335
17:21:00	3.72292	262.217
17:31:00	3.72986	256.139
17:41:00	3.73681	258.407
17:51:00	3.74375	255.472
18:01:00	3.75069	254.765
18:11:00	3.75764	252.374
18:21:00	3.76458	249.098
18:31:00	3.77153	250.668
18:41:00	3.77847	246.645
18:51:00	3.78542	249.054
19:01:00	3.79236	244.571
19:11:00	3.79931	245.705
19:21:00	3.80625	244.769
19:31:00	3.81319	244.118
19:41:00	3.82014	245.844
19:51:00	3.82708	239.599
20:01:00	3.83403	241.706
20:11:00	3.84097	240.956
20:21:00	3.84792	237.959
20:31:00	3.85486	241.212
20:41:00	3.86181	240.505
20:51:00	3.86875	239.918
21:01:00	3.87569	236.933
21:11:00	3.88264	235.139
21:21:00	3.88958	233.947
21:31:00	3.89653	235.842
21:41:00	3.90347	233.923
21:51:00	3.91042	232.533
22:01:00	3.91736	234.523
22:11:00	3.92431	232.797
22:21:00	3.93125	230.967
22:31:00	3.93819	233.114
22:41:00	3.94514	237.092
22:51:00	3.95208	234.195
23:01:00	3.95903	231.358
23:11:00	3.96597	230.947
23:21:00	3.97292	236.217
23:31:00	3.97986	231.866
23:41:00	3.98681	233.6
23:51:00	3.99375	233.052
00:01:00	4.00069	233.603
00:11:00	4.00764	235.276
00:21:00	4.01458	236.668
00:31:00	4.02153	230.944
00:41:00	4.02847	233.156
00:51:00	4.03542	232.017
01:01:00	4.04236	231.877
01:11:00	4.04931	232.111
01:21:00	4.05625	238.178
01:31:00	4.06319	238.708
01:41:00	4.07014	234.883
01:51:00	4.07708	238.094
02:01:00	4.08403	236.725
02:11:00	4.09097	235.331
02:21:00	4.09792	235.7
02:31:00	4.10486	234.021
02:41:00	4.11181	235.055
02:51:00	4.11875	235.868
03:01:00	4.12569	233.047
03:11:00	4.13264	235.649
03:21:00	4.13958	234.481
03:31:00	4.14653	236.617
03:41:00	4.15347	237.236
03:51:00	4.16042	234.104
04:01:00	4.16736	235.081
04:11:00	4.17431	233.809
04:21:00	4.18125	235.994
04:31:00	4.18819	234.085
04:41:00	4.19514	231.977
04:51:00	4.20208	235.306
05:01:00	4.20903	232.259
05:11:00	4.21597	234.612
05:21:00	4.22292	235.655
05:31:00	4.22986	232.574
05:41:00	4.23681	233.627
05:51:00	4.24375	234.215
06:01:00	4.25069	231.948
06:11:00	4.25764	232.38
06:21:00	4.26458	234.771
06:31:00	4.27153	232.764
06:41:00	4.27847	227.083
06:51:00	4.28542	228.198
07:01:00	4.29236	231.81
07:11:00	4.29931	232.301
07:21:00	4.30625	228.725
07:31:00	4.31319	228.979
07:41:00	4.32014	226.312
07:51:00	4.32708	226.236
08:01:00	4.33403	227.905
08:11:00	4.34097	224.624
08:21:00	4.34792	224.148
08:31:00	4.35486	226.835
08:41:00	4.36181	222.838
08:51:00	4.36875	220.228
09:01:00	4.37569	224.962
09:11:00	4.38264	221.637
09:21:00	4.38958	216.935
09:31:00	4.39653	214.803
09:41:00	4.40347	216.297
09:51:00	4.41042	215.288
10:01:00	4.41736	212.26
10:11:00	4.42431	212.086
10:21:00	4.43125	214.514
10:31:00	4.43819	213.692
10:41:00	4.44514	211.34
10:51:00	4.45208	211.971
11:01:00	4.45903	209.787
11:11:00	4.46597	210.169
11:21:00	4.47292	206.164
11:31:00	4.47986	208.247
11:41:00	4.48681	205.693
11:51:00	4.49375	200.422
12:01:00	4.50069	201.758
12:11:00	4.50764	205.668
12:21:00	4.51458	196.51
12:31:00	4.52153	197.922
12:41:00	4.52847	200.834
12:51:00	4.53542	196.527
13:01:00	4.54236	197.114
13:11:00	4.54931	195.356
13:21:00	4.55625	196.856
13:31:00	4.56319	194.12
13:41:00	4.57014	191.509
13:51:00	4.57708	191.152
14:01:00	4.58403	190.001
14:11:00	4.59097	189.551
14:21:00	4.59792	188.194
14:31:00	4.60486	185.742
14:41:00	4.61181	187.826
14:51:00	4.61875	185.631
15:01:00	4.62569	183.526
15:11:00	4.63264	183.569
15:21:00	4.63958	185.079
15:31:00	4.64653	179.699
15:41:00	4.65347	178.595
15:51:00	4.66042	180.809
16:01:00	4.66736	182.222
16:11:00	4.67431	178.559
16:21:00	4.68125	177.694
16:31:00	4.68819	176.544
16:41:00	4.69514	175.943
16:51:00	4.70208	173.104
17:01:00	4.70903	177.359
17:11:00	4.71597	171.156
17:21:00	4.72292	174.971
17:31:00	4.72986	171.301
17:41:00	4.73681	172.815
17:51:00	4.74375	175.422
18:01:00	4.75069	172.391
18:11:00	4.75764	172.806
18:21:00	4.76458	170.284
18:31:00	4.77153	173.522
18:41:00	4.77847	172.761
18:51:00	4.78542	169.467
19:01:00	4.79236	168.549
19:11:00	4.79931	170.654
19:21:00	4.80625	170.819
19:31:00	4.81319	167.605
19:41:00	4.82014	169.238
19:51:00	4.82708	167.704
20:01:00	4.83403	167.6
20:11:00	4.84097	166.886
20:21:00	4.84792	164.665
20:31:00	4.85486	165.81
20:41:00	4.86181	166.181
20:51:00	4.86875	166.888
21:01:00	4.87569	166.775
21:11:00	4.88264	164.822
21:21:00	4.88958	164.965
21:31:00	4.89653	167.067
21:41:00	4.90347	165.071
21:51:00	4.91042	162.199
22:01:00	4.91736	166.696
22:11:00	4.92431	160.158
22:21:00	4.93125	162.341
22:31:00	4.93819	167.612
22:41:00	4.94514	167.553
22:51:00	4.95208	166.409
23:01:00	4.95903	166.756
23:11:00	4.96597	167.198
23:21:00	4.97292	165.375
23:31:00	4.97986	164.768
23:41:00	4.98681	163.93
23:51:00	4.99375	166.099
00:01:00	5.00069	166.809
00:11:00	5.00764	166.667
00:21:00	5.01458	167.109
00:31:00	5.02153	165.333
00:41:00	5.02847	166.455
00:51:00	5.03542	166.679
01:01:00	5.04236	166.806
01:11:00	5.04931	164.33
01:21:00	5.05625	165.705
01:31:00	5.06319	164.872
01:41:00	5.07014	168.164
01:51:00	5.07708	165.256
02:01:00	5.08403	162.743
02:11:00	5.09097	162.791
02:21:00	5.09792	166.465
02:31:00	5.10486	163.663
02:41:00	5.11181	167.22
02:51:00	5.11875	166.638
03:01:00	5.12569	164.462
03:11:00	5.13264	167.905
03:21:00	5.13958	164.639
03:31:00	5.14653	166.383
03:41:00	5.15347	162.874
03:51:00	5.16042	162.498
04:01:00	5.16736	167.288
04:11:00	5.17431	166.414
04:21:00	5.18125	165.267
04:31:00	5.18819	164.733
04:41:00	5.19514	163.318
04:51:00	5.20208	164.755
05:01:00	5.20903	162.225
05:11:00	5.21597	164.331
05:21:00	5.22292	162.067
05:31:00	5.22986	162.047
05:41:00	5.23681	163.335
05:51:00	5.24375	163.602
06:01:00	5.25069	162.255
06:11:00	5.25764	161.908
06:21:00	5.26458	159.319
06:31:00	5.27153	161.075
06:41:00	5.27847	158.076
06:51:00	5.28542	157.769
07:01:00	5.29236	159.694
07:11:00	5.29931	159.354
07:21:00	5.30625	161.71
07:31:00	5.31319	154.796
07:41:00	5.32014	156.85
07:51:00	5.32708	155.931
08:01:00	5.33403	156.59
08:11:00	5.34097	153.264
08:21:00	5.34792	155.798
08:31:00	5.35486	155.095
08:41:00	5.36181	153.566
08:51:00	5.36875	150.838
09:01:00	5.37569	153.283
09:11:00	5.38264	155.023
09:21:00	5.38958	149.126
09:31:00	5.39653	153.388
09:41:00	5.40347	146.816
09:51:00	5.41042	148.716
10:01:00	5.41736	147.814
10:11:00	5.42431	145.983
10:21:00	5.43125	146.926
10:31:00	5.43819	147.535
10:41:00	5.44514	148.756
10:51:00	5.45208	144.606
11:01:00	5.45903	146.7
11:11:00	5.46597	146.091
11:21:00	5.47292	145.725
11:31:00	5.47986	143.872
11:41:00	5.48681	143.989
11:51:00	5.49375	142.497
12:01:00	5.50069	142.214
12:11:00	5.50764	144.4
12:21:00	5.51458	139.237
12:31:00	5.52153	137.669
12:41:00	5.52847	137.507
12:51:00	5.53542	136.756
13:01:00	5.54236	137.725
13:11:00	5.54931	138.212
13:21:00	5.55625	138.612
13:31:00	5.56319	137.738
13:41:00	5.57014	136.307
13:51:00	5.57708	137.227
14:01:00	5.58403	136.46
14:11:00	5.59097	135.516
14:21:00	5.59792	136.505
14:31:00	5.60486	135.64
14:41:00	5.61181	134.754
14:51:00	5.61875	133.845
15:01:00	5.62569	134.68
15:11:00	5.63264	132.772
15:21:00	5.63958	134.131
15:31:00	5.64653	131.635
15:41:00	5.65347	134.033
15:51:00	5.66042	130.744
16:01:00	5.66736	128.869
16:11:00	5.67431	132.67
16:21:00	5.68125	130.253
16:31:00	5.68819	129.142
16:41:00	5.69514	128.358
16:51:00	5.70208	129.263
17:01:00	5.70903	129.074
17:11:00	5.71597	129.807
17:21:00	5.72292	129.732
17:31:00	5.72986	126.068
17:41:00	5.73681	129.139
17:51:00	5.74375	128.647
18:01:00	5.75069	126.966
18:11:00	5.75764	128.203
18:21:00	5.76458	127.005
18:31:00	5.77153	127.569
18:41:00	5.77847	125.623
18:51:00	5.78542	127.028
19:01:00	5.79236	124.951
19:11:00	5.79931	126.119
19:21:00	5.80625	126.465
19:31:00	5.81319	122.401
19:41:00	5.82014	123.781
19:51:00	5.82708	124.785
20:01:00	5.83403	125.664
20:11:00	5.84097	122.806
20:21:00	5.84792	123.507
20:31:00	5.85486	124.949
20:41:00	5.86181	122.592
20:51:00	5.86875	123.851
21:01:00	5.87569	123.094
21:11:00	5.88264	124.031
21:21:00	5.88958	123.637
21:31:00	5.89653	123.574
21:41:00	5.90347	123.776
21:51:00	5.91042	123.16
22:01:00	5.91736	120.071
22:11:00	5.92431	120.323
22:21:00	5.93125	124.183
22:31:00	5.93819	121.616
22:41:00	5.94514	120.404
22:51:00	5.95208	121.588
23:01:00	5.95903	120.823
23:11:00	5.96597	121.256
23:21:00	5.97292	119.419
23:31:00	5.97986	121.488
23:41:00	5.98681	120.802
23:51:00	5.99375	119.239
00:01:00	6.00069	118.652
00:11:00	6.00764	119.599
00:21:00	6.01458	115.397
00:31:00	6.02153	121.259
00:41:00	6.02847	121.88
00:51:00	6.03542	120.671
01:01:00	6.04236	118.816
01:11:00	6.04931	120.042
01:21:00	6.05625	119.394
01:31:00	6.06319	116.582
01:41:00	6.07014	117.807
01:51:00	6.07708	119.433
02:01:00	6.08403	119.129
02:11:00	6.09097	119.475
02:21:00	6.09792	118.452
02:31:00	6.10486	118.789
02:41:00	6.11181	118.828
02:51:00	6.11875	117.706
03:01:00	6.12569	117.787
03:11:00	6.13264	119.852
03:21:00	6.13958	119.989
03:31:00	6.14653	118.543
03:41:00	6.15347	118.657
03:51:00	6.16042	117.393
04:01:00	6.16736	117.555
04:11:00	6.17431	116.222
04:21:00	6.18125	116.634
04:31:00	6.18819	116.447
04:41:00	6.19514	117.09
04:51:00	6.20208	116.559
05:01:00	6.20903	116.804
05:11:00	6.21597	118.852
05:21:00	6.22292	115.439
05:31:00	6.22986	120.487
05:41:00	6.23681	116.678
05:51:00	6.24375	118.374
06:01:00	6.25069	117.374
06:11:00	6.25764	115.187
06:21:00	6.26458	116.429
06:31:00	6.27153	118.913
06:41:00	6.27847	114.159
06:51:00	6.28542	114.114
07:01:00	6.29236	115.958
07:11:00	6.29931	116.081
07:21:00	6.30625	114.851
07:31:00	6.31319	117.819
07:41:00	6.32014	115.82
07:51:00	6.32708	114.987
08:01:00	6.33403	116.347
08:11:00	6.34097	115.398
08:21:00	6.34792	111.511
08:31:00	6.35486	113.945
08:41:00	6.36181	115.692
08:51:00	6.36875	114.829
09:01:00	6.37569	115.847
09:11:00	6.38264	114.451
09:21:00	6.38958	114.189
09:31:00	6.39653	113.792
09:41:00	6.40347	111.321
09:51:00	6.41042	115.241
10:01:00	6.41736	114.718
10:11:00	6.42431	113.384
10:21:00	6.43125	115.012
10:31:00	6.43819	113.416
10:41:00	6.44514	112.557
10:51:00	6.45208	113.631
11:01:00	6.45903	111.744
11:11:00	6.46597	114.304
11:21:00	6.47292	110.879
11:31:00	6.47986	112.971
11:41:00	6.48681	110.6
11:51:00	6.49375	113.164
12:01:00	6.50069	113.443
12:11:00	6.50764	110.024
12:21:00	6.51458	111.843
12:31:00	6.52153	112.43
12:41:00	6.52847	113.159
12:51:00	6.53542	110.208
13:01:00	6.54236	110.93
13:11:00	6.54931	109.504
13:21:00	6.55625	112.085
13:31:00	6.56319	111.299
13:41:00	6.57014	111.438
13:51:00	6.57708	109.51
14:01:00	6.58403	110.432
14:11:00	6.59097	111.555
14:21:00	6.59792	108.962
14:31:00	6.60486	108.331
14:41:00	6.61181	109.48
14:51:00	6.61875	108.524
15:01:00	6.62569	108.371
15:11:00	6.63264	106.313
15:21:00	6.63958	106.815
15:31:00	6.64653	109.859
15:41:00	6.65347	106.768
15:51:00	6.66042	109.18
16:01:00	6.66736	110.789
16:11:00	6.67431	108.967
16:21:00	6.68125	107.845
16:31:00	6.68819	108.355
16:41:00	6.69514	105.682
16:51:00	6.70208	107.941
17:01:00	6.70903	106.421
17:11:00	6.71597	105.672
17:21:00	6.72292	104.16
17:31:00	6.72986	107.738
17:41:00	6.73681	105.161
17:51:00	6.74375	105.14
18:01:00	6.75069	106.269
18:11:00	6.75764	106.299
18:21:00	6.76458	105.328
18:31:00	6.77153	103.518
18:41:00	6.77847	106.389
18:51:00	6.78542	104.865
19:01:00	6.79236	105.167
19:11:00	6.79931	104.309
19:21:00	6.80625	103.926
19:31:00	6.81319	104.786
19:41:00	6.82014	104.076
19:51:00	6.82708	101.476
20:01:00	6.83403	104.195
20:11:00	6.84097	102.503
20:21:00	6.84792	102
20:31:00	6.85486	100.816
20:41:00	6.86181	101.296
20:51:00	6.86875	104.236
21:01:00	6.87569	103.344
21:11:00	6.88264	102.195
21:21:00	6.88958	100.944
21:31:00	6.89653	99.69
21:41:00	6.90347	100.02
21:51:00	6.91042	99.121
22:01:00	6.91736	101.38
22:11:00	6.92431	102.38
22:21:00	6.93125	100.916
22:31:00	6.93819	101.532
22:41:00	6.94514	99.612
22:51:00	6.95208	100.163
23:01:00	6.95903	98.241
23:11:00	6.96597	100.264
23:21:00	6.97292	97.13
23:31:00	6.97986	100.398
23:41:00	6.98681	97.96
23:51:00	6.99375	98.272
00:01:00	7.00069	98.019
00:11:00	7.00764	97.852
00:21:00	7.01458	98.36
00:31:00	7.02153	97.142
00:41:00	7.02847	99.534
00:51:00	7.03542	96.176
01:01:00	7.04236	96.655
01:11:00	7.04931	96.259
01:21:00	7.05625	98.158
01:31:00	7.06319	94.821
01:41:00	7.07014	96.471
01:51:00	7.07708	97.103
02:01:00	7.08403	97.422
02:11:00	7.09097	93.755
02:21:00	7.09792	95.455
02:31:00	7.10486	97.2
02:41:00	7.11181	95.805
02:51:00	7.11875	95.477
03:01:00	7.12569	98.001
03:11:00	7.13264	95.635
03:21:00	7.13958	96.487
03:31:00	7.14653	95.416
03:41:00	7.15347	95.697

## Sheet: ada-2ko-raw data
LumiCycle: ada2 ko-FRQ-luc (Raw)
Time (hr:min)	Time (days)	counts/sec
01:15:00	1.05208	74.117
01:25:00	1.05903	72.244
01:35:00	1.06597	71.446
01:45:00	1.07292	71.781
01:55:00	1.07986	69.468
02:05:00	1.08681	71.281
02:15:00	1.09375	66.671
02:25:00	1.10069	66.839
02:35:00	1.10764	66.427
02:45:00	1.11458	64.661
02:55:00	1.12153	64.969
03:05:00	1.12847	65.021
03:15:00	1.13542	64.133
03:25:00	1.14236	64.422
03:35:00	1.14931	63.443
03:45:00	1.15625	64.327
03:55:00	1.16319	63.404
04:05:00	1.17014	62.172
04:15:00	1.17708	65.31
04:25:00	1.18403	64.601
04:35:00	1.19097	68.487
04:45:00	1.19792	65.401
04:55:00	1.20486	65.865
05:05:00	1.21181	67.432
05:15:00	1.21875	66.512
05:25:00	1.22569	68.814
05:35:00	1.23264	67.596
05:45:00	1.23958	69.852
05:55:00	1.24653	74.308
06:05:00	1.25347	72.955
06:15:00	1.26042	74.186
06:25:00	1.26736	74.951
06:35:00	1.27431	78.357
06:45:00	1.28125	79.284
06:55:00	1.28819	81.486
07:05:00	1.29514	81.957
07:15:00	1.30208	84.947
07:25:00	1.30903	86.769
07:35:00	1.31597	86.992
07:45:00	1.32292	91.463
07:55:00	1.32986	90.878
08:05:00	1.33681	92.432
08:15:00	1.34375	94.156
08:25:00	1.35069	98.097
08:35:00	1.35764	99.208
08:45:00	1.36458	100.756
08:55:00	1.37153	105.672
09:05:00	1.37847	107.427
09:15:00	1.38542	110.708
09:25:00	1.39236	111.572
09:35:00	1.39931	115.293
09:45:00	1.40625	114.229
09:55:00	1.41319	117.096
10:05:00	1.42014	120.235
10:15:00	1.42708	121.344
10:25:00	1.43403	123.966
10:35:00	1.44097	129.518
10:45:00	1.44792	130.581
10:55:00	1.45486	132.724
11:05:00	1.46181	132.791
11:15:00	1.46875	133.139
11:25:00	1.47569	137.701
11:35:00	1.48264	141.508
11:45:00	1.48958	142.301
11:55:00	1.49653	143.4
12:05:00	1.50347	143.753
12:15:00	1.51042	144.528
12:25:00	1.51736	150.189
12:35:00	1.52431	150.214
12:45:00	1.53125	148.567
12:55:00	1.53819	151.396
13:05:00	1.54514	151.567
13:15:00	1.55208	154.618
13:25:00	1.55903	155.405
13:35:00	1.56597	158.656
13:45:00	1.57292	158.03
13:55:00	1.57986	157.689
14:05:00	1.58681	158.368
14:15:00	1.59375	158.219
14:25:00	1.60069	161.837
14:35:00	1.60764	160.121
14:45:00	1.61458	160.742
14:55:00	1.62153	162.561
15:05:00	1.62847	162.371
15:15:00	1.63542	162.971
15:25:00	1.64236	162.918
15:35:00	1.64931	163.351
15:45:00	1.65625	165.288
15:55:00	1.66319	160.421
16:05:00	1.67014	165.399
16:15:00	1.67708	164.523
16:25:00	1.68403	164.598
16:35:00	1.69097	167.176
16:45:00	1.69792	164.532
16:55:00	1.70486	165.978
17:05:00	1.71181	167.782
17:15:00	1.71875	167.521
17:25:00	1.72569	163.818
17:35:00	1.73264	164.497
17:45:00	1.73958	166.921
17:55:00	1.74653	164.498
18:05:00	1.75347	169.386
18:15:00	1.76042	164.433
18:25:00	1.76736	163.735
18:35:00	1.77431	163.685
18:45:00	1.78125	163.021
18:55:00	1.78819	164.128
19:05:00	1.79514	158.669
19:15:00	1.80208	161.824
19:25:00	1.80903	162.911
19:35:00	1.81597	162.494
19:45:00	1.82292	157.952
19:55:00	1.82986	160.281
20:05:00	1.83681	157.643
20:15:00	1.84375	154.299
20:25:00	1.85069	155.679
20:35:00	1.85764	154.438
20:45:00	1.86458	154.018
20:55:00	1.87153	153.465
21:05:00	1.87847	153.469
21:15:00	1.88542	153.607
21:25:00	1.89236	155.239
21:35:00	1.89931	151.674
21:45:00	1.90625	149.973
21:55:00	1.91319	152.245
22:05:00	1.92014	147.46
22:15:00	1.92708	149.415
22:25:00	1.93403	147.133
22:35:00	1.94097	149.436
22:45:00	1.94792	147.719
22:55:00	1.95486	147.989
23:05:00	1.96181	146.375
23:15:00	1.96875	145.545
23:25:00	1.97569	143.877
23:35:00	1.98264	145.098
23:45:00	1.98958	147.011
23:55:00	1.99653	143.604
00:05:00	2.00347	145.483
00:15:00	2.01042	142.907
00:25:00	2.01736	142.692
00:35:00	2.02431	144.551
00:45:00	2.03125	143.357
00:55:00	2.03819	141.785
01:05:00	2.04514	141.251
01:15:00	2.05208	145.373
01:25:00	2.05903	142.112
01:35:00	2.06597	142.907
01:45:00	2.07292	146.301
01:55:00	2.07986	142.253
02:05:00	2.08681	142.812
02:15:00	2.09375	142.837
02:25:00	2.10069	141.958
02:35:00	2.10764	143.982
02:45:00	2.11458	143.808
02:55:00	2.12153	143.904
03:05:00	2.12847	145.364
03:15:00	2.13542	145.939
03:25:00	2.14236	145.033
03:35:00	2.14931	145.656
03:45:00	2.15625	144.074
03:55:00	2.16319	142.855
04:05:00	2.17014	144.97
04:15:00	2.17708	145.047
04:25:00	2.18403	143.887
04:35:00	2.19097	145.041
04:45:00	2.19792	142.863
04:55:00	2.20486	146.86
05:05:00	2.21181	144.604
05:15:00	2.21875	142.814
05:25:00	2.22569	143.044
05:35:00	2.23264	144.272
05:45:00	2.23958	145.638
05:55:00	2.24653	143.617
06:05:00	2.25347	145.059
06:15:00	2.26042	147.631
06:25:00	2.26736	148.032
06:35:00	2.27431	148.951
06:45:00	2.28125	146.924
06:55:00	2.28819	145.452
07:05:00	2.29514	146.399
07:15:00	2.30208	147.954
07:25:00	2.30903	145.299
07:35:00	2.31597	145.913
07:45:00	2.32292	149.479
07:55:00	2.32986	145.834
08:05:00	2.33681	146.185
08:15:00	2.34375	149.907
08:25:00	2.35069	149.969
08:35:00	2.35764	146.514
08:45:00	2.36458	147.437
08:55:00	2.37153	147.643
09:05:00	2.37847	148.998
09:15:00	2.38542	148.894
09:25:00	2.39236	149.851
09:35:00	2.39931	146.557
09:45:00	2.40625	147.933
09:55:00	2.41319	152.067
10:05:00	2.42014	149.471
10:15:00	2.42708	149.419
10:25:00	2.43403	154.896
10:35:00	2.44097	148.944
10:45:00	2.44792	151.488
10:55:00	2.45486	152.632
11:05:00	2.46181	149.794
11:15:00	2.46875	155.687
11:25:00	2.47569	151.931
11:35:00	2.48264	151.228
11:45:00	2.48958	152.013
11:55:00	2.49653	153.999
12:05:00	2.50347	155.612
12:15:00	2.51042	156.202
12:25:00	2.51736	158.617
12:35:00	2.52431	155.572
12:45:00	2.53125	157.151
12:55:00	2.53819	156.012
13:05:00	2.54514	158.143
13:15:00	2.55208	158.418
13:25:00	2.55903	158.048
13:35:00	2.56597	159.664
13:45:00	2.57292	161.093
13:55:00	2.57986	157.248
14:05:00	2.58681	157.421
14:15:00	2.59375	161.824
14:25:00	2.60069	161.744
14:35:00	2.60764	158.294
14:45:00	2.61458	161.574
14:55:00	2.62153	159.206
15:05:00	2.62847	160.61
15:15:00	2.63542	163.175
15:25:00	2.64236	163.04
15:35:00	2.64931	162.329
15:45:00	2.65625	161.671
15:55:00	2.66319	159.798
16:05:00	2.67014	167.152
16:15:00	2.67708	163.226
16:25:00	2.68403	169.12
16:35:00	2.69097	169.155
16:45:00	2.69792	167.974
16:55:00	2.70486	167.143
17:05:00	2.71181	169.38
17:15:00	2.71875	167.096
17:25:00	2.72569	163.695
17:35:00	2.73264	167.126
17:45:00	2.73958	170.012
17:55:00	2.74653	168.244
18:05:00	2.75347	169.864
18:15:00	2.76042	170.406
18:25:00	2.76736	168.79
18:35:00	2.77431	170.476
18:45:00	2.78125	172.297
18:55:00	2.78819	171.905
19:05:00	2.79514	173.029
19:15:00	2.80208	172.864
19:25:00	2.80903	174.065
19:35:00	2.81597	173.779
19:45:00	2.82292	174.918
19:55:00	2.82986	176.518
20:05:00	2.83681	177.175
20:15:00	2.84375	173.845
20:25:00	2.85069	176.666
20:35:00	2.85764	179.309
20:45:00	2.86458	176.82
20:55:00	2.87153	179.232
21:05:00	2.87847	176.281
21:15:00	2.88542	178.015
21:25:00	2.89236	178.905
21:35:00	2.89931	178.859
21:45:00	2.90625	176.096
21:55:00	2.91319	177.455
22:05:00	2.92014	182.143
22:15:00	2.92708	183.076
22:25:00	2.93403	178.765
22:35:00	2.94097	181.199
22:45:00	2.94792	180.988
22:55:00	2.95486	181.615
23:05:00	2.96181	180.626
23:15:00	2.96875	180.088
23:25:00	2.97569	185.195
23:35:00	2.98264	184.428
23:45:00	2.98958	184.671
23:55:00	2.99653	181.738
00:05:00	3.00347	184.767
00:15:00	3.01042	182.863
00:25:00	3.01736	182.579
00:35:00	3.02431	186.211
00:45:00	3.03125	186.673
00:55:00	3.03819	183.946
01:05:00	3.04514	182.283
01:15:00	3.05208	185.467
01:25:00	3.05903	185.107
01:35:00	3.06597	183.833
01:45:00	3.07292	184.075
01:55:00	3.07986	186.817
02:05:00	3.08681	184.113
02:15:00	3.09375	183.817
02:25:00	3.10069	183.6
02:35:00	3.10764	184.622
02:45:00	3.11458	187.741
02:55:00	3.12153	186.255
03:05:00	3.12847	182.376
03:15:00	3.13542	188.414
03:25:00	3.14236	190.766
03:35:00	3.14931	188.238
03:45:00	3.15625	188.988
03:55:00	3.16319	186.806
04:05:00	3.17014	189.632
04:15:00	3.17708	185.782
04:25:00	3.18403	188.959
04:35:00	3.19097	190.667
04:45:00	3.19792	189.698
04:55:00	3.20486	187.112
05:05:00	3.21181	188.538
05:15:00	3.21875	187.44
05:25:00	3.22569	188.603
05:35:00	3.23264	194.762
05:45:00	3.23958	190.294
05:55:00	3.24653	190.482
06:05:00	3.25347	190.24
06:15:00	3.26042	190.833
06:25:00	3.26736	190.982
06:35:00	3.27431	188.358
06:45:00	3.28125	191.619
06:55:00	3.28819	192.094
07:05:00	3.29514	193.537
07:15:00	3.30208	189.05
07:25:00	3.30903	193.541
07:35:00	3.31597	190.837
07:45:00	3.32292	192.589
07:55:00	3.32986	190.167
08:05:00	3.33681	194.982
08:15:00	3.34375	195.222
08:25:00	3.35069	192.532
08:35:00	3.35764	194.452
08:45:00	3.36458	194.421
08:55:00	3.37153	194.726
09:05:00	3.37847	196.437
09:15:00	3.38542	194.626
09:25:00	3.39236	193.117
09:35:00	3.39931	195.858
09:45:00	3.40625	193.537
09:55:00	3.41319	198.191
10:05:00	3.42014	197.339
10:15:00	3.42708	195.835
10:25:00	3.43403	196.581
10:35:00	3.44097	198.026
10:45:00	3.44792	195.319
10:55:00	3.45486	196.876
11:05:00	3.46181	193.9
11:15:00	3.46875	197.913
11:25:00	3.47569	197.739
11:35:00	3.48264	194.743
11:45:00	3.48958	201.09
11:55:00	3.49653	199.502
12:05:00	3.50347	198.05
12:15:00	3.51042	197.087
12:25:00	3.51736	198.27
12:35:00	3.52431	199.96
12:45:00	3.53125	200.156
12:55:00	3.53819	200.086
13:05:00	3.54514	196.515
13:15:00	3.55208	196.893
13:25:00	3.55903	200.651
13:35:00	3.56597	200.534
13:45:00	3.57292	200.677
13:55:00	3.57986	199.971
14:05:00	3.58681	198.669
14:15:00	3.59375	202.383
14:25:00	3.60069	199.436
14:35:00	3.60764	201.375
14:45:00	3.61458	201.93
14:55:00	3.62153	203.372
15:05:00	3.62847	200.712
15:15:00	3.63542	203.221
15:25:00	3.64236	205.657
15:35:00	3.64931	202.927
15:45:00	3.65625	202.018
15:55:00	3.66319	205.136
16:05:00	3.67014	204.432
16:15:00	3.67708	201.891
16:25:00	3.68403	204.277
16:35:00	3.69097	205.594
16:45:00	3.69792	202.681
16:55:00	3.70486	205.46
17:05:00	3.71181	208.401
17:15:00	3.71875	206.822
17:25:00	3.72569	204.785
17:35:00	3.73264	205.584
17:45:00	3.73958	207.796
17:55:00	3.74653	203.661
18:05:00	3.75347	204.613
18:15:00	3.76042	206.959
18:25:00	3.76736	205.8
18:35:00	3.77431	204.861
18:45:00	3.78125	207.566
18:55:00	3.78819	209.343
19:05:00	3.79514	209.119
19:15:00	3.80208	208.32
19:25:00	3.80903	206.838
19:35:00	3.81597	204.681
19:45:00	3.82292	210.676
19:55:00	3.82986	208.047
20:05:00	3.83681	209.393
20:15:00	3.84375	206.847
20:25:00	3.85069	208.572
20:35:00	3.85764	209.206
20:45:00	3.86458	206.618
20:55:00	3.87153	207.021
21:05:00	3.87847	207.374
21:15:00	3.88542	206.003
21:25:00	3.89236	208.517
21:35:00	3.89931	208.084
21:45:00	3.90625	205.981
21:55:00	3.91319	209.481
22:05:00	3.92014	209.128
22:15:00	3.92708	207.348
22:25:00	3.93403	209.545
22:35:00	3.94097	208.346
22:45:00	3.94792	209.172
22:55:00	3.95486	207.496
23:05:00	3.96181	205.424
23:15:00	3.96875	209.653
23:25:00	3.97569	210.198
23:35:00	3.98264	208.375
23:45:00	3.98958	205.949
23:55:00	3.99653	209.443
00:05:00	4.00347	207.635
00:15:00	4.01042	204.608
00:25:00	4.01736	208.879
00:35:00	4.02431	206.323
00:45:00	4.03125	207.564
00:55:00	4.03819	207.028
01:05:00	4.04514	205.255
01:15:00	4.05208	202.626
01:25:00	4.05903	205.647
01:35:00	4.06597	207.389
01:45:00	4.07292	208.445
01:55:00	4.07986	205.669
02:05:00	4.08681	208.45
02:15:00	4.09375	205.204
02:25:00	4.10069	207.098
02:35:00	4.10764	209.5
02:45:00	4.11458	207.154
02:55:00	4.12153	205.275
03:05:00	4.12847	203.951
03:15:00	4.13542	212.805
03:25:00	4.14236	209.25
03:35:00	4.14931	208.517
03:45:00	4.15625	207.909
03:55:00	4.16319	211.698
04:05:00	4.17014	209.044
04:15:00	4.17708	205.113
04:25:00	4.18403	211.588
04:35:00	4.19097	204.808
04:45:00	4.19792	208.898
04:55:00	4.20486	210.002
05:05:00	4.21181	209.065
05:15:00	4.21875	209.344
05:25:00	4.22569	208.089
05:35:00	4.23264	210.902
05:45:00	4.23958	209.762
05:55:00	4.24653	207.77
06:05:00	4.25347	206.695
06:15:00	4.26042	211.827
06:25:00	4.26736	213.455
06:35:00	4.27431	210.095
06:45:00	4.28125	210.638
06:55:00	4.28819	213.95
07:05:00	4.29514	209.505
07:15:00	4.30208	211.152
07:25:00	4.30903	213.123
07:35:00	4.31597	215.011
07:45:00	4.32292	210.819
07:55:00	4.32986	209.653
08:05:00	4.33681	215.367
08:15:00	4.34375	215.872
08:25:00	4.35069	210.036
08:35:00	4.35764	214.385
08:45:00	4.36458	211.816
08:55:00	4.37153	212.999
09:05:00	4.37847	214.438
09:15:00	4.38542	214.302
09:25:00	4.39236	212.94
09:35:00	4.39931	213.391
09:45:00	4.40625	213.605
09:55:00	4.41319	213.999
10:05:00	4.42014	209.85
10:15:00	4.42708	213.154
10:25:00	4.43403	216.718
10:35:00	4.44097	218.504
10:45:00	4.44792	214.338
10:55:00	4.45486	217.931
11:05:00	4.46181	218.566
11:15:00	4.46875	214.185
11:25:00	4.47569	213.917
11:35:00	4.48264	217.835
11:45:00	4.48958	214.186
11:55:00	4.49653	216.887
12:05:00	4.50347	217.458
12:15:00	4.51042	213.621
12:25:00	4.51736	219.54
12:35:00	4.52431	214.857
12:45:00	4.53125	217.128
12:55:00	4.53819	217.805
13:05:00	4.54514	220.713
13:15:00	4.55208	218.163
13:25:00	4.55903	218.93
13:35:00	4.56597	218.127
13:45:00	4.57292	213.91
13:55:00	4.57986	216.207
14:05:00	4.58681	217.031
14:15:00	4.59375	216.103
14:25:00	4.60069	216.388
14:35:00	4.60764	218.531
14:45:00	4.61458	219.61
14:55:00	4.62153	218.066
15:05:00	4.62847	217.289
15:15:00	4.63542	221.628
15:25:00	4.64236	219.579
15:35:00	4.64931	218.439
15:45:00	4.65625	219.096
15:55:00	4.66319	218.495
16:05:00	4.67014	217.692
16:15:00	4.67708	216.236
16:25:00	4.68403	215.105
16:35:00	4.69097	217.145
16:45:00	4.69792	214.417
16:55:00	4.70486	216.632
17:05:00	4.71181	217.221
17:15:00	4.71875	216.766
17:25:00	4.72569	215.335
17:35:00	4.73264	214.51
17:45:00	4.73958	217.723
17:55:00	4.74653	219.925
18:05:00	4.75347	219.125
18:15:00	4.76042	218.301
18:25:00	4.76736	214.816
18:35:00	4.77431	220.877
18:45:00	4.78125	219.771
18:55:00	4.78819	217.794
19:05:00	4.79514	214.395
19:15:00	4.80208	214.93
19:25:00	4.80903	214.648
19:35:00	4.81597	215.446
19:45:00	4.82292	215.793
19:55:00	4.82986	215.67
20:05:00	4.83681	216.206
20:15:00	4.84375	212.13
20:25:00	4.85069	218.588
20:35:00	4.85764	217.216
20:45:00	4.86458	214.192
20:55:00	4.87153	212.622
21:05:00	4.87847	215.798
21:15:00	4.88542	217.272
21:25:00	4.89236	216.938
21:35:00	4.89931	211.746
21:45:00	4.90625	212.26
21:55:00	4.91319	214.473
22:05:00	4.92014	216.407
22:15:00	4.92708	213.612
22:25:00	4.93403	217.411
22:35:00	4.94097	214.532
22:45:00	4.94792	215.933
22:55:00	4.95486	215.555
23:05:00	4.96181	212.822
23:15:00	4.96875	215.82
23:25:00	4.97569	213.962
23:35:00	4.98264	215.704
23:45:00	4.98958	213.574
23:55:00	4.99653	215.722
00:05:00	5.00347	214.136
00:15:00	5.01042	215.773
00:25:00	5.01736	214.668
00:35:00	5.02431	214.16
00:45:00	5.03125	214.973
00:55:00	5.03819	216.608
01:05:00	5.04514	218.244
01:15:00	5.05208	215.332
01:25:00	5.05903	216.369
01:35:00	5.06597	215.546
01:45:00	5.07292	213.887
01:55:00	5.07986	212.042
02:05:00	5.08681	211.702
02:15:00	5.09375	215.631
02:25:00	5.10069	214.369
02:35:00	5.10764	212.939
02:45:00	5.11458	213.078
02:55:00	5.12153	215.302
03:05:00	5.12847	210.576
03:15:00	5.13542	214.556
03:25:00	5.14236	215.357
03:35:00	5.14931	215.427
03:45:00	5.15625	215.231
03:55:00	5.16319	216.874
04:05:00	5.17014	212.038
04:15:00	5.17708	212.211
04:25:00	5.18403	214.532
04:35:00	5.19097	213.106
04:45:00	5.19792	212.974
04:55:00	5.20486	215.129
05:05:00	5.21181	213.706
05:15:00	5.21875	215.925
05:25:00	5.22569	215.025
05:35:00	5.23264	213.898
05:45:00	5.23958	213.381
05:55:00	5.24653	212.755
06:05:00	5.25347	212.873
06:15:00	5.26042	211.966
06:25:00	5.26736	214.477
06:35:00	5.27431	211.51
06:45:00	5.28125	213.089
06:55:00	5.28819	212.102
07:05:00	5.29514	211.692
07:15:00	5.30208	213.779
07:25:00	5.30903	210.937
07:35:00	5.31597	212.879
07:45:00	5.32292	211.958
07:55:00	5.32986	215.844
08:05:00	5.33681	212.407
08:15:00	5.34375	215.022
08:25:00	5.35069	212.892
08:35:00	5.35764	211.551
08:45:00	5.36458	212.482
08:55:00	5.37153	215.815
09:05:00	5.37847	213.614
09:15:00	5.38542	218.406
09:25:00	5.39236	214.743
09:35:00	5.39931	212.54
09:45:00	5.40625	211.022
09:55:00	5.41319	210.188
10:05:00	5.42014	210.51
10:15:00	5.42708	212.329
10:25:00	5.43403	213.415
10:35:00	5.44097	212.296
10:45:00	5.44792	211.56
10:55:00	5.45486	211.186
11:05:00	5.46181	212.867
11:15:00	5.46875	212.615
11:25:00	5.47569	211.048
11:35:00	5.48264	210.523
11:45:00	5.48958	210.673
11:55:00	5.49653	212.124
12:05:00	5.50347	211.087
12:15:00	5.51042	210.718
12:25:00	5.51736	212.998
12:35:00	5.52431	209.999
12:45:00	5.53125	209.937
12:55:00	5.53819	210.322
13:05:00	5.54514	211.544
13:15:00	5.55208	210.005
13:25:00	5.55903	212.68
13:35:00	5.56597	206.518
13:45:00	5.57292	209.374
13:55:00	5.57986	209.608
14:05:00	5.58681	212.424
14:15:00	5.59375	207.052
14:25:00	5.60069	210.29
14:35:00	5.60764	209.488
14:45:00	5.61458	208.399
14:55:00	5.62153	205.597
15:05:00	5.62847	206.744
15:15:00	5.63542	209.058
15:25:00	5.64236	206.584
15:35:00	5.64931	208.503
15:45:00	5.65625	209.557
15:55:00	5.66319	212.996
16:05:00	5.67014	208.023
16:15:00	5.67708	208.513
16:25:00	5.68403	208.509
16:35:00	5.69097	208.572
16:45:00	5.69792	210.25
16:55:00	5.70486	207.158
17:05:00	5.71181	206.122
17:15:00	5.71875	205.818
17:25:00	5.72569	210.355
17:35:00	5.73264	210.375
17:45:00	5.73958	205.553
17:55:00	5.74653	208.383
18:05:00	5.75347	205.168
18:15:00	5.76042	205.54
18:25:00	5.76736	207.05
18:35:00	5.77431	207.717
18:45:00	5.78125	206.553
18:55:00	5.78819	203.816
19:05:00	5.79514	209.382
19:15:00	5.80208	209.067
19:25:00	5.80903	206.432
19:35:00	5.81597	207.433
19:45:00	5.82292	210.664
19:55:00	5.82986	206.104
20:05:00	5.83681	205.03
20:15:00	5.84375	204.636
20:25:00	5.85069	207.85
20:35:00	5.85764	204.244
20:45:00	5.86458	204.006
20:55:00	5.87153	206.563
21:05:00	5.87847	207.216
21:15:00	5.88542	207.145
21:25:00	5.89236	205.696
21:35:00	5.89931	207.249
21:45:00	5.90625	205.534
21:55:00	5.91319	206.862
22:05:00	5.92014	207.506
22:15:00	5.92708	207.142
22:25:00	5.93403	207.438
22:35:00	5.94097	202.645
22:45:00	5.94792	203.427
22:55:00	5.95486	203.121
23:05:00	5.96181	203.11
23:15:00	5.96875	201.947
23:25:00	5.97569	206.744
23:35:00	5.98264	204.354
23:45:00	5.98958	202.507
23:55:00	5.99653	204.204
00:05:00	6.00347	198.879
00:15:00	6.01042	202.923
00:25:00	6.01736	204.297
00:35:00	6.02431	204.473
00:45:00	6.03125	203.244
00:55:00	6.03819	205.288
01:05:00	6.04514	202.524
01:15:00	6.05208	206.784
01:25:00	6.05903	201.153
01:35:00	6.06597	202.105
01:45:00	6.07292	203.426
01:55:00	6.07986	201.118
02:05:00	6.08681	201.78
02:15:00	6.09375	204.136
02:25:00	6.10069	203.617
02:35:00	6.10764	198.258
02:45:00	6.11458	199.542
02:55:00	6.12153	199.839
03:05:00	6.12847	202.668
03:15:00	6.13542	202.89
03:25:00	6.14236	201.268
03:35:00	6.14931	200.547
03:45:00	6.15625	198.735
03:55:00	6.16319	201.001
04:05:00	6.17014	202.148
04:15:00	6.17708	200.858
04:25:00	6.18403	199.89
04:35:00	6.19097	200.029
04:45:00	6.19792	199.588
04:55:00	6.20486	199.254
05:05:00	6.21181	198.303
05:15:00	6.21875	196.693
05:25:00	6.22569	201.596
05:35:00	6.23264	197.227
05:45:00	6.23958	201.638
05:55:00	6.24653	197.121
06:05:00	6.25347	196.366
06:15:00	6.26042	196.575
06:25:00	6.26736	196.654
06:35:00	6.27431	199.464
06:45:00	6.28125	197.542
06:55:00	6.28819	197.734
07:05:00	6.29514	196.808
07:15:00	6.30208	198.564
07:25:00	6.30903	197.766
07:35:00	6.31597	196.225
07:45:00	6.32292	195.122
07:55:00	6.32986	197.001
08:05:00	6.33681	201.634
08:15:00	6.34375	197.391
08:25:00	6.35069	194.938
08:35:00	6.35764	197.87
08:45:00	6.36458	197.717
08:55:00	6.37153	196.092
09:05:00	6.37847	198.259
09:15:00	6.38542	197.574
09:25:00	6.39236	194.66
09:35:00	6.39931	193.773
09:45:00	6.40625	196.402
09:55:00	6.41319	197.372
10:05:00	6.42014	196.652
10:15:00	6.42708	199.671
10:25:00	6.43403	196.965
10:35:00	6.44097	195.466
10:45:00	6.44792	195.668
10:55:00	6.45486	195.945
11:05:00	6.46181	197.14
11:15:00	6.46875	196.618
11:25:00	6.47569	196.433
11:35:00	6.48264	196.047
11:45:00	6.48958	195.85
11:55:00	6.49653	195.055
12:05:00	6.50347	194.641
12:15:00	6.51042	198.806
12:25:00	6.51736	193.179
12:35:00	6.52431	195.601
12:45:00	6.53125	195.564
12:55:00	6.53819	201.144
13:05:00	6.54514	199.148
13:15:00	6.55208	194.94
13:25:00	6.55903	194.348
13:35:00	6.56597	196.107
13:45:00	6.57292	193.948
13:55:00	6.57986	195.678
14:05:00	6.58681	194.196
14:15:00	6.59375	195.936
14:25:00	6.60069	193.665
14:35:00	6.60764	194.519
14:45:00	6.61458	195.607
14:55:00	6.62153	195.106
15:05:00	6.62847	194.415
15:15:00	6.63542	196.02
15:25:00	6.64236	194.172
15:35:00	6.64931	196.345
15:45:00	6.65625	194.41
15:55:00	6.66319	194.445
16:05:00	6.67014	194.282
16:15:00	6.67708	193.95
16:25:00	6.68403	192.176
16:35:00	6.69097	193.457
16:45:00	6.69792	194.374
16:55:00	6.70486	193.793
17:05:00	6.71181	196.041
17:15:00	6.71875	191.714
17:25:00	6.72569	191.618
17:35:00	6.73264	193.263
17:45:00	6.73958	190.971
17:55:00	6.74653	193.467
18:05:00	6.75347	196.603
18:15:00	6.76042	193.41
18:25:00	6.76736	192.088
18:35:00	6.77431	189.932
18:45:00	6.78125	194.839
18:55:00	6.78819	194.568
19:05:00	6.79514	194.195
19:15:00	6.80208	193.418
19:25:00	6.80903	190.66
19:35:00	6.81597	189.686
19:45:00	6.82292	193.798
19:55:00	6.82986	192.095
20:05:00	6.83681	194.8
20:15:00	6.84375	191.726
20:25:00	6.85069	192.873
20:35:00	6.85764	189.366
20:45:00	6.86458	191.733
20:55:00	6.87153	189.412
21:05:00	6.87847	190.152
21:15:00	6.88542	192.056
21:25:00	6.89236	188.636
21:35:00	6.89931	190.74
21:45:00	6.90625	191.166
21:55:00	6.91319	191.926
22:05:00	6.92014	189.656
22:15:00	6.92708	190.553
22:25:00	6.93403	189.935
22:35:00	6.94097	187.205
22:45:00	6.94792	187.834
22:55:00	6.95486	192.417
23:05:00	6.96181	186.309
23:15:00	6.96875	187.507
23:25:00	6.97569	191.561
23:35:00	6.98264	189.893
23:45:00	6.98958	187.505
23:55:00	6.99653	189.65
00:05:00	7.00347	183.762
00:15:00	7.01042	188.737
00:25:00	7.01736	187.149
00:35:00	7.02431	190.421
00:45:00	7.03125	185.382
00:55:00	7.03819	189.303
01:05:00	7.04514	186.92
01:15:00	7.05208	185.604
01:25:00	7.05903	188.522
01:35:00	7.06597	184.005
01:45:00	7.07292	187.65
01:55:00	7.07986	185.962
02:05:00	7.08681	184.278
02:15:00	7.09375	189.196
02:25:00	7.10069	184.208
02:35:00	7.10764	188.362
02:45:00	7.11458	185.749
02:55:00	7.12153	185.864
03:05:00	7.12847	188.084
03:15:00	7.13542	186.93
03:25:00	7.14236	187.494
03:35:00	7.14931	184.251

## Sheet: WT-normalized data
LumiCycle: WT-FRQ-luc (Baseline subtracted)
Time (hr:min)	Time (days)	counts/sec
12:41:00	1.04931	-44.399
12:51:00	1.05625	-47.567
13:01:00	1.06319	-48.596
13:11:00	1.07014	-47.932
13:21:00	1.07708	-47.562
13:31:00	1.08403	-48.139
13:41:00	1.09097	-49.149
13:51:00	1.09792	-49.167
14:01:00	1.10486	-49.502
14:11:00	1.11181	-46.896
14:21:00	1.11875	-44.469
14:31:00	1.12569	-46.24
14:41:00	1.13264	-44.06
14:51:00	1.13958	-38.187
15:01:00	1.14653	-38.166
15:11:00	1.15347	-39.593
15:21:00	1.16042	-31.157
15:31:00	1.16736	-35.851
15:41:00	1.17431	-28.131
15:51:00	1.18125	-27.131
16:01:00	1.18819	-23.35
16:11:00	1.19514	-19.89
16:21:00	1.20208	-19.786
16:31:00	1.20903	-16.093
16:41:00	1.21597	-13.051
16:51:00	1.22292	-7.01
17:01:00	1.22986	-6.599
17:11:00	1.23681	-3.401
17:21:00	1.24375	0.588
17:31:00	1.25069	3.36
17:41:00	1.25764	2.078
17:51:00	1.26458	8.626
18:01:00	1.27153	11.144
18:11:00	1.27847	12.459
18:21:00	1.28542	17.756
18:31:00	1.29236	26.636
18:41:00	1.29931	27.596
18:51:00	1.30625	31.112
19:01:00	1.31319	34.933
19:11:00	1.32014	29.272
19:21:00	1.32708	39.035
19:31:00	1.33403	42.09
19:41:00	1.34097	49.238
19:51:00	1.34792	50.565
20:01:00	1.35486	50.336
20:11:00	1.36181	56.465
20:21:00	1.36875	60.319
20:31:00	1.37569	56.476
20:41:00	1.38264	65.022
20:51:00	1.38958	65.409
21:01:00	1.39653	66.255
21:11:00	1.40347	70.667
21:21:00	1.41042	71.484
21:31:00	1.41736	71.984
21:41:00	1.42431	80.812
21:51:00	1.43125	80.382
22:01:00	1.43819	82.897
22:11:00	1.44514	86.702
22:21:00	1.45208	82.813
22:31:00	1.45903	84.774
22:41:00	1.46597	85.055
22:51:00	1.47292	87.332
23:01:00	1.47986	86.062
23:11:00	1.48681	81.678
23:21:00	1.49375	89.766
23:31:00	1.50069	87.015
23:41:00	1.50764	80.61
23:51:00	1.51458	80.36
00:01:00	1.52153	82.138
00:11:00	1.52847	82.185
00:21:00	1.53542	79.89
00:31:00	1.54236	77.084
00:41:00	1.54931	73.925
00:51:00	1.55625	72.624
01:01:00	1.56319	73.568
01:11:00	1.57014	67.831
01:21:00	1.57708	65.557
01:31:00	1.58403	63.597
01:41:00	1.59097	61.992
01:51:00	1.59792	53.731
02:01:00	1.60486	56.351
02:11:00	1.61181	52.082
02:21:00	1.61875	52.067
02:31:00	1.62569	46.237
02:41:00	1.63264	42.506
02:51:00	1.63958	40.134
03:01:00	1.64653	38.453
03:11:00	1.65347	35.655
03:21:00	1.66042	29.141
03:31:00	1.66736	25.627
03:41:00	1.67431	21.872
03:51:00	1.68125	18.73
04:01:00	1.68819	13.528
04:11:00	1.69514	11.187
04:21:00	1.70208	6.589
04:31:00	1.70903	6.478
04:41:00	1.71597	2.355
04:51:00	1.72292	-2.242
05:01:00	1.72986	-3.593
05:11:00	1.73681	-7.747
05:21:00	1.74375	-12.27
05:31:00	1.75069	-7.764
05:41:00	1.75764	-13.464
05:51:00	1.76458	-17.074
06:01:00	1.77153	-19.595
06:11:00	1.77847	-30.661
06:21:00	1.78542	-30.546
06:31:00	1.79236	-30.31
06:41:00	1.79931	-34.614
06:51:00	1.80625	-39.601
07:01:00	1.81319	-42.505
07:11:00	1.82014	-43.165
07:21:00	1.82708	-44.756
07:31:00	1.83403	-44.042
07:41:00	1.84097	-51.39
07:51:00	1.84792	-49.695
08:01:00	1.85486	-52.31
08:11:00	1.86181	-54.315
08:21:00	1.86875	-54.127
08:31:00	1.87569	-57.765
08:41:00	1.88264	-58.876
08:51:00	1.88958	-62.633
09:01:00	1.89653	-64.856
09:11:00	1.90347	-62.42
09:21:00	1.91042	-66.347
09:31:00	1.91736	-63.553
09:41:00	1.92431	-68.1
09:51:00	1.93125	-64.444
10:01:00	1.93819	-66.45
10:11:00	1.94514	-69.407
10:21:00	1.95208	-68.398
10:31:00	1.95903	-65.992
10:41:00	1.96597	-70.73
10:51:00	1.97292	-70.258
11:01:00	1.97986	-67.947
11:11:00	1.98681	-66.06
11:21:00	1.99375	-67.254
11:31:00	2.00069	-64.594
11:41:00	2.00764	-63.46
11:51:00	2.01458	-63.842
12:01:00	2.02153	-65.118
12:11:00	2.02847	-62.289
12:21:00	2.03542	-59.358
12:31:00	2.04236	-63.66
12:41:00	2.04931	-54.82
12:51:00	2.05625	-53.893
13:01:00	2.06319	-56.396
13:11:00	2.07014	-49.581
13:21:00	2.07708	-50.014
13:31:00	2.08403	-45.378
13:41:00	2.09097	-44.527
13:51:00	2.09792	-40.113
14:01:00	2.10486	-38.112
14:11:00	2.11181	-35.611
14:21:00	2.11875	-33.616
14:31:00	2.12569	-34.601
14:41:00	2.13264	-25.221
14:51:00	2.13958	-21.976
15:01:00	2.14653	-20.554
15:11:00	2.15347	-20.745
15:21:00	2.16042	-15.562
15:31:00	2.16736	-16.172
15:41:00	2.17431	-12.311
15:51:00	2.18125	-8.71
16:01:00	2.18819	-5.589
16:11:00	2.19514	-2.123
16:21:00	2.20208	0.142
16:31:00	2.20903	0.33
16:41:00	2.21597	6.797
16:51:00	2.22292	6.475
17:01:00	2.22986	11.118
17:11:00	2.23681	17.949
17:21:00	2.24375	17.336
17:31:00	2.25069	17.077
17:41:00	2.25764	19.383
17:51:00	2.26458	22.241
18:01:00	2.27153	22.992
18:11:00	2.27847	27.859
18:21:00	2.28542	28.484
18:31:00	2.29236	30.401
18:41:00	2.29931	36.949
18:51:00	2.30625	37.75
19:01:00	2.31319	39.968
19:11:00	2.32014	41.726
19:21:00	2.32708	43.234
19:31:00	2.33403	43.365
19:41:00	2.34097	48.172
19:51:00	2.34792	49.703
20:01:00	2.35486	51.196
20:11:00	2.36181	54.107
20:21:00	2.36875	49.86
20:31:00	2.37569	51.591
20:41:00	2.38264	52.623
20:51:00	2.38958	51.611
21:01:00	2.39653	60.222
21:11:00	2.40347	60.702
21:21:00	2.41042	59.777
21:31:00	2.41736	55.82
21:41:00	2.42431	55.51
21:51:00	2.43125	54.5
22:01:00	2.43819	55.661
22:11:00	2.44514	53.071
22:21:00	2.45208	53.758
22:31:00	2.45903	54.943
22:41:00	2.46597	54.222
22:51:00	2.47292	54.102
23:01:00	2.47986	55.806
23:11:00	2.48681	56.537
23:21:00	2.49375	49.5
23:31:00	2.50069	47.901
23:41:00	2.50764	48.708
23:51:00	2.51458	48.098
00:01:00	2.52153	45.967
00:11:00	2.52847	44.098
00:21:00	2.53542	42.638
00:31:00	2.54236	40.844
00:41:00	2.54931	43.161
00:51:00	2.55625	35.541
01:01:00	2.56319	36.654
01:11:00	2.57014	34.417
01:21:00	2.57708	34.588
01:31:00	2.58403	31.038
01:41:00	2.59097	29.493
01:51:00	2.59792	27.115
02:01:00	2.60486	24.759
02:11:00	2.61181	19.552
02:21:00	2.61875	18.67
02:31:00	2.62569	16.895
02:41:00	2.63264	14.342
02:51:00	2.63958	9.231
03:01:00	2.64653	8.412
03:11:00	2.65347	6.806
03:21:00	2.66042	4.963
03:31:00	2.66736	0.238
03:41:00	2.67431	-2.175
03:51:00	2.68125	-5.502
04:01:00	2.68819	-2.475
04:11:00	2.69514	-5.712
04:21:00	2.70208	-6.399
04:31:00	2.70903	-9.835
04:41:00	2.71597	-8.539
04:51:00	2.72292	-12.979
05:01:00	2.72986	-11.93
05:11:00	2.73681	-15.289
05:21:00	2.74375	-20.113
05:31:00	2.75069	-21.549
05:41:00	2.75764	-24.133
05:51:00	2.76458	-17.518
06:01:00	2.77153	-23.471
06:11:00	2.77847	-27.733
06:21:00	2.78542	-33.175
06:31:00	2.79236	-26.611
06:41:00	2.79931	-31.195
06:51:00	2.80625	-32.483
07:01:00	2.81319	-34.28
07:11:00	2.82014	-33.817
07:21:00	2.82708	-34.313
07:31:00	2.83403	-38.6
07:41:00	2.84097	-38.828
07:51:00	2.84792	-34.801
08:01:00	2.85486	-38.77
08:11:00	2.86181	-36.57
08:21:00	2.86875	-39.928
08:31:00	2.87569	-36.936
08:41:00	2.88264	-38.552
08:51:00	2.88958	-34.398
09:01:00	2.89653	-38.457
09:11:00	2.90347	-35.856
09:21:00	2.91042	-36.479
09:31:00	2.91736	-40.587
09:41:00	2.92431	-40.755
09:51:00	2.93125	-36.82
10:01:00	2.93819	-37.857
10:11:00	2.94514	-36.139
10:21:00	2.95208	-35.78
10:31:00	2.95903	-37.526
10:41:00	2.96597	-37.617
10:51:00	2.97292	-34.605
11:01:00	2.97986	-31.764
11:11:00	2.98681	-29.378
11:21:00	2.99375	-30.62
11:31:00	3.00069	-27.028
11:41:00	3.00764	-28.711
11:51:00	3.01458	-26.855
12:01:00	3.02153	-25.95
12:11:00	3.02847	-20.098
12:21:00	3.03542	-21.14
12:31:00	3.04236	-23.167
12:41:00	3.04931	-21.436
12:51:00	3.05625	-21.566
13:01:00	3.06319	-16.254
13:11:00	3.07014	-13.942
13:21:00	3.07708	-13.472
13:31:00	3.08403	-12.065
13:41:00	3.09097	-10.728
13:51:00	3.09792	-12.191
14:01:00	3.10486	-6.106
14:11:00	3.11181	-1.98
14:21:00	3.11875	-2.287
14:31:00	3.12569	-1.413
14:41:00	3.13264	-0.847
14:51:00	3.13958	3.547
15:01:00	3.14653	3.177
15:11:00	3.15347	6.69
15:21:00	3.16042	5.232
15:31:00	3.16736	8.589
15:41:00	3.17431	12.427
15:51:00	3.18125	9.151
16:01:00	3.18819	11.583
16:11:00	3.19514	13
16:21:00	3.20208	13.931
16:31:00	3.20903	17.121
16:41:00	3.21597	18.335
16:51:00	3.22292	19.564
17:01:00	3.22986	21.771
17:11:00	3.23681	22.365
17:21:00	3.24375	26.391
17:31:00	3.25069	21.884
17:41:00	3.25764	23.511
17:51:00	3.26458	25.745
18:01:00	3.27153	29.66
18:11:00	3.27847	28.438
18:21:00	3.28542	25.718
18:31:00	3.29236	28.75
18:41:00	3.29931	29.72
18:51:00	3.30625	31.009
19:01:00	3.31319	34.587
19:11:00	3.32014	30.635
19:21:00	3.32708	33.951
19:31:00	3.33403	30.088
19:41:00	3.34097	31.92
19:51:00	3.34792	32.42
20:01:00	3.35486	32.459
20:11:00	3.36181	30.678
20:21:00	3.36875	30.037
20:31:00	3.37569	31.848
20:41:00	3.38264	30.808
20:51:00	3.38958	30.994
21:01:00	3.39653	34.551
21:11:00	3.40347	30.342
21:21:00	3.41042	32.582
21:31:00	3.41736	31.659
21:41:00	3.42431	30.318
21:51:00	3.43125	28.87
22:01:00	3.43819	30.514
22:11:00	3.44514	26.401
22:21:00	3.45208	27.972
22:31:00	3.45903	28.148
22:41:00	3.46597	29.27
22:51:00	3.47292	27.37
23:01:00	3.47986	26.296
23:11:00	3.48681	27.043
23:21:00	3.49375	23.39
23:31:00	3.50069	24.998
23:41:00	3.50764	23.862
23:51:00	3.51458	17.581
00:01:00	3.52153	18.019
00:11:00	3.52847	21.672
00:21:00	3.53542	22.082
00:31:00	3.54236	17.626
00:41:00	3.54931	17.907
00:51:00	3.55625	12.424
01:01:00	3.56319	14.996
01:11:00	3.57014	12.783
01:21:00	3.57708	14.64
01:31:00	3.58403	9.275
01:41:00	3.59097	8.268
01:51:00	3.59792	5.57
02:01:00	3.60486	8.435
02:11:00	3.61181	5.055
02:21:00	3.61875	4.877
02:31:00	3.62569	3.853
02:41:00	3.63264	5.464
02:51:00	3.63958	4.841
03:01:00	3.64653	-0.678
03:11:00	3.65347	-5.041
03:21:00	3.66042	1.188
03:31:00	3.66736	-0.893
03:41:00	3.67431	-2.396
03:51:00	3.68125	-2.496
04:01:00	3.68819	-10.608
04:11:00	3.69514	-5.109
04:21:00	3.70208	-5.709
04:31:00	3.70903	-8.753
04:41:00	3.71597	-5.454
04:51:00	3.72292	-7.079
05:01:00	3.72986	-12.663
05:11:00	3.73681	-9.837
05:21:00	3.74375	-12.252
05:31:00	3.75069	-12.382
05:41:00	3.75764	-14.242
05:51:00	3.76458	-17.001
06:01:00	3.77153	-14.854
06:11:00	3.77847	-18.272
06:21:00	3.78542	-15.232
06:31:00	3.79236	-19.178
06:41:00	3.79931	-17.452
06:51:00	3.80625	-17.78
07:01:00	3.81319	-17.815
07:11:00	3.82014	-15.416
07:21:00	3.82708	-21.07
07:31:00	3.83403	-18.304
07:41:00	3.84097	-18.422
07:51:00	3.84792	-20.787
08:01:00	3.85486	-16.875
08:11:00	3.86181	-16.924
08:21:00	3.86875	-16.848
08:31:00	3.87569	-19.225
08:41:00	3.88264	-20.369
08:51:00	3.88958	-20.883
09:01:00	3.89653	-18.273
09:11:00	3.90347	-19.492
09:21:00	3.91042	-20.202
09:31:00	3.91736	-17.473
09:41:00	3.92431	-18.493
09:51:00	3.93125	-19.646
10:01:00	3.93819	-16.799
10:11:00	3.94514	-12.082
10:21:00	3.95208	-14.323
10:31:00	3.95903	-16.479
10:41:00	3.96597	-16.195
10:51:00	3.97292	-10.156
11:01:00	3.97986	-13.835
11:11:00	3.98681	-11.377
11:21:00	3.99375	-11.177
11:31:00	4.00069	-9.907
11:41:00	4.00764	-7.525
11:51:00	4.01458	-5.372
12:01:00	4.02153	-10.439
12:11:00	4.02847	-7.534
12:21:00	4.03542	-7.95
12:31:00	4.04236	-7.364
12:41:00	4.04931	-6.422
12:51:00	4.05625	0.383
13:01:00	4.06319	1.592
13:11:00	4.07014	-1.55
13:21:00	4.07708	2.377
13:31:00	4.08403	1.712
13:41:00	4.09097	0.985
13:51:00	4.09792	2.034
14:01:00	4.10486	1.016
14:11:00	4.11181	2.733
14:21:00	4.11875	4.217
14:31:00	4.12569	2.052
14:41:00	4.13264	5.339
14:51:00	4.13958	4.826
15:01:00	4.14653	7.671
15:11:00	4.15347	8.955
15:21:00	4.16042	6.414
15:31:00	4.16736	8.04
15:41:00	4.17431	7.41
15:51:00	4.18125	10.253
16:01:00	4.18819	8.978
16:11:00	4.19514	7.447
16:21:00	4.20208	11.445
16:31:00	4.20903	8.986
16:41:00	4.21597	11.984
16:51:00	4.22292	13.655
17:01:00	4.22986	11.183
17:11:00	4.23681	12.823
17:21:00	4.24375	13.991
17:31:00	4.25069	12.285
17:41:00	4.25764	13.289
17:51:00	4.26458	16.267
18:01:00	4.27153	14.771
18:11:00	4.27847	9.591
18:21:00	4.28542	11.25
18:31:00	4.29236	15.446
18:41:00	4.29931	16.453
18:51:00	4.30625	13.373
19:01:00	4.31319	14.164
19:11:00	4.32014	11.999
19:21:00	4.32708	12.465
19:31:00	4.33403	14.646
19:41:00	4.34097	11.861
19:51:00	4.34792	11.912
20:01:00	4.35486	15.119
20:11:00	4.36181	11.615
20:21:00	4.36875	9.498
20:31:00	4.37569	14.773
20:41:00	4.38264	11.926
20:51:00	4.38958	7.679
21:01:00	4.39653	5.996
21:11:00	4.40347	7.991
21:21:00	4.41042	7.473
21:31:00	4.41736	4.882
21:41:00	4.42431	5.223
21:51:00	4.43125	8.158
22:01:00	4.43819	7.77
22:11:00	4.44514	5.857
22:21:00	4.45208	6.983
22:31:00	4.45903	5.252
22:41:00	4.46597	6.083
22:51:00	4.47292	2.505
23:01:00	4.47986	5.098
23:11:00	4.48681	2.999
23:21:00	4.49375	-1.841
23:31:00	4.50069	-0.035
23:41:00	4.50764	4.366
23:51:00	4.51458	-4.382
00:01:00	4.52153	-2.464
00:11:00	4.52847	0.916
00:21:00	4.53542	-2.959
00:31:00	4.54236	-1.915
00:41:00	4.54931	-3.217
00:51:00	4.55625	-1.245
01:01:00	4.56319	-3.491
01:11:00	4.57014	-5.63
01:21:00	4.57708	-5.506
01:31:00	4.58403	-6.142
01:41:00	4.59097	-6.082
01:51:00	4.59792	-6.97
02:01:00	4.60486	-8.938
02:11:00	4.61181	-6.376
02:21:00	4.61875	-8.112
02:31:00	4.62569	-9.735
02:41:00	4.63264	-9.24
02:51:00	4.63958	-7.225
03:01:00	4.64653	-12.17
03:11:00	4.65347	-12.77
03:21:00	4.66042	-10.021
03:31:00	4.66736	-8.134
03:41:00	4.67431	-11.347
03:51:00	4.68125	-11.741
04:01:00	4.68819	-12.405
04:11:00	4.69514	-12.518
04:21:00	4.70208	-14.91
04:31:00	4.70903	-10.118
04:41:00	4.71597	-15.892
04:51:00	4.72292	-11.546
05:01:00	4.72986	-14.731
05:11:00	4.73681	-12.726
05:21:00	4.74375	-9.615
05:31:00	4.75069	-12.166
05:41:00	4.75764	-11.262
05:51:00	4.76458	-13.295
06:01:00	4.77153	-9.523
06:11:00	4.77847	-9.77
06:21:00	4.78542	-12.606
06:31:00	4.79236	-13.055
06:41:00	4.79931	-10.432
06:51:00	4.80625	-9.775
07:01:00	4.81319	-12.498
07:11:00	4.82014	-10.353
07:21:00	4.82708	-11.409
07:31:00	4.83403	-11.03
07:41:00	4.84097	-11.231
07:51:00	4.84792	-12.989
08:01:00	4.85486	-11.356
08:11:00	4.86181	-10.474
08:21:00	4.86875	-9.262
08:31:00	4.87569	-8.911
08:41:00	4.88264	-10.392
08:51:00	4.88958	-9.744
09:01:00	4.89653	-7.187
09:11:00	4.90347	-8.724
09:21:00	4.91042	-11.146
09:31:00	4.91736	-6.15
09:41:00	4.92431	-12.273
09:51:00	4.93125	-9.623
10:01:00	4.93819	-3.85
10:11:00	4.94514	-3.458
10:21:00	4.95208	-4.146
10:31:00	4.95903	-3.344
10:41:00	4.96597	-2.456
10:51:00	4.97292	-3.844
11:01:00	4.97986	-4.023
11:11:00	4.98681	-4.42
11:21:00	4.99375	-1.798
11:31:00	5.00069	-0.679
11:41:00	5.00764	-0.424
11:51:00	5.01458	0.483
12:01:00	5.02153	-0.897
12:11:00	5.02847	0.653
12:21:00	5.03542	1.323
12:31:00	5.04236	1.86
12:41:00	5.04931	-0.224
12:51:00	5.05625	1.554
13:01:00	5.06319	1.125
13:11:00	5.07014	4.842
13:21:00	5.07708	2.29
13:31:00	5.08403	0.14
13:41:00	5.09097	0.567
13:51:00	5.09792	4.634
14:01:00	5.10486	2.178
14:11:00	5.11181	6.114
14:21:00	5.11875	5.902
14:31:00	5.12569	4.066
14:41:00	5.13264	7.885
14:51:00	5.13958	4.94
15:01:00	5.14653	7.067
15:11:00	5.15347	3.851
15:21:00	5.16042	3.804
15:31:00	5.16736	8.988
15:41:00	5.17431	8.452
15:51:00	5.18125	7.633
16:01:00	5.18819	7.432
16:11:00	5.19514	6.342
16:21:00	5.20208	8.113
16:31:00	5.20903	5.871
16:41:00	5.21597	8.322
16:51:00	5.22292	6.33
17:01:00	5.22986	6.649
17:11:00	5.23681	8.239
17:21:00	5.24375	8.814
17:31:00	5.25069	7.795
17:41:00	5.25764	7.752
17:51:00	5.26458	5.463
18:01:00	5.27153	7.528
18:11:00	5.27847	4.841
18:21:00	5.28542	4.849
18:31:00	5.29236	7.097
18:41:00	5.29931	7.05
18:51:00	5.30625	9.729
19:01:00	5.31319	3.103
19:11:00	5.32014	5.476
19:21:00	5.32708	4.859
19:31:00	5.33403	5.814
19:41:00	5.34097	2.777
19:51:00	5.34792	5.629
20:01:00	5.35486	5.197
20:11:00	5.36181	3.958
20:21:00	5.36875	1.505
20:31:00	5.37569	4.27
20:41:00	5.38264	6.32
20:51:00	5.38958	0.667
21:01:00	5.39653	5.246
21:11:00	5.40347	-1.07
21:21:00	5.41042	1.133
21:31:00	5.41736	0.518
21:41:00	5.42431	-1.003
21:51:00	5.43125	0.196
22:01:00	5.43819	1.092
22:11:00	5.44514	2.649
22:21:00	5.45208	-1.211
22:31:00	5.45903	1.214
22:41:00	5.46597	0.917
22:51:00	5.47292	0.881
23:01:00	5.47986	-0.681
23:11:00	5.48681	-0.257
23:21:00	5.49375	-1.45
23:31:00	5.50069	-1.405
23:41:00	5.50764	1.124
23:51:00	5.51458	-3.719
00:01:00	5.52153	-4.979
00:11:00	5.52847	-4.84
00:21:00	5.53542	-5.279
00:31:00	5.54236	-3.971
00:41:00	5.54931	-3.156
00:51:00	5.55625	-2.441
01:01:00	5.56319	-2.979
01:11:00	5.57014	-4.093
01:21:00	5.57708	-2.829
01:31:00	5.58403	-3.281
01:41:00	5.59097	-3.931
01:51:00	5.59792	-2.627
02:01:00	5.60486	-3.167
02:11:00	5.61181	-3.748
02:21:00	5.61875	-4.319
02:31:00	5.62569	-3.14
02:41:00	5.63264	-4.751
02:51:00	5.63958	-3.05
03:01:00	5.64653	-5.243
03:11:00	5.65347	-2.497
03:21:00	5.66042	-5.493
03:31:00	5.66736	-7.068
03:41:00	5.67431	-2.886
03:51:00	5.68125	-4.975
04:01:00	5.68819	-5.754
04:11:00	5.69514	-6.213
04:21:00	5.70208	-4.977
04:31:00	5.70903	-4.834
04:41:00	5.71597	-3.795
04:51:00	5.72292	-3.531
05:01:00	5.72986	-6.931
05:11:00	5.73681	-3.524
05:21:00	5.74375	-3.708
05:31:00	5.75069	-5.079
05:41:00	5.75764	-3.507
05:51:00	5.76458	-4.397
06:01:00	5.77153	-3.549
06:11:00	5.77847	-5.183
06:21:00	5.78542	-3.462
06:31:00	5.79236	-5.263
06:41:00	5.79931	-3.784
06:51:00	5.80625	-3.128
07:01:00	5.81319	-6.914
07:11:00	5.82014	-5.255
07:21:00	5.82708	-3.952
07:31:00	5.83403	-2.793
07:41:00	5.84097	-5.385
07:51:00	5.84792	-4.388
08:01:00	5.85486	-2.645
08:11:00	5.86181	-4.745
08:21:00	5.86875	-3.209
08:31:00	5.87569	-3.728
08:41:00	5.88264	-2.515
08:51:00	5.88958	-2.628
09:01:00	5.89653	-2.446
09:11:00	5.90347	-1.951
09:21:00	5.91042	-2.352
09:31:00	5.91736	-5.226
09:41:00	5.92431	-4.733
09:51:00	5.93125	-0.631
10:01:00	5.93819	-2.984
10:11:00	5.94514	-3.961
10:21:00	5.95208	-2.524
10:31:00	5.95903	-3.067
10:41:00	5.96597	-2.406
10:51:00	5.97292	-4.011
11:01:00	5.97986	-1.7
11:11:00	5.98681	-2.16
11:21:00	5.99375	-3.52
11:31:00	6.00069	-3.909
11:41:00	6.00764	-2.732
11:51:00	6.01458	-6.737
12:01:00	6.02153	-0.648
12:11:00	6.02847	0.147
12:21:00	6.03542	-0.881
12:31:00	6.04236	-2.569
12:41:00	6.04931	-1.139
12:51:00	6.05625	-1.61
13:01:00	6.06319	-4.251
13:11:00	6.07014	-2.836
13:21:00	6.07708	-1.012
13:31:00	6.08403	-1.131
13:41:00	6.09097	-0.61
13:51:00	6.09792	-1.456
14:01:00	6.10486	-0.921
14:11:00	6.11181	-0.7
14:21:00	6.11875	-1.647
14:31:00	6.12569	-1.389
14:41:00	6.13264	0.886
14:51:00	6.13958	1.205
15:01:00	6.14653	-0.083
15:11:00	6.15347	0.205
15:21:00	6.16042	-0.895
15:31:00	6.16736	-0.593
15:41:00	6.17431	-1.797
15:51:00	6.18125	-1.21
16:01:00	6.18819	-1.246
16:11:00	6.19514	-0.436
16:21:00	6.20208	-0.829
16:31:00	6.20903	-0.423
16:41:00	6.21597	1.801
16:51:00	6.22292	-1.458
17:01:00	6.22986	3.778
17:11:00	6.23681	0.088
17:21:00	6.24375	1.962
17:31:00	6.25069	1.11
17:41:00	6.25764	-0.948
17:51:00	6.26458	0.462
18:01:00	6.27153	3.126
18:11:00	6.27847	-1.514
18:21:00	6.28542	-1.415
18:31:00	6.29236	0.594
18:41:00	6.29931	0.861
18:51:00	6.30625	-0.223
19:01:00	6.31319	2.915
19:11:00	6.32014	1.03
19:21:00	6.32708	0.346
19:31:00	6.33403	1.859
19:41:00	6.34097	1.064
19:51:00	6.34792	-2.706
20:01:00	6.35486	-0.097
20:11:00	6.36181	1.826
20:21:00	6.36875	1.085
20:31:00	6.37569	2.252
20:41:00	6.38264	0.991
20:51:00	6.38958	0.888
21:01:00	6.39653	0.654
21:11:00	6.40347	-1.67
21:21:00	6.41042	2.449
21:31:00	6.41736	2.073
21:41:00	6.42431	0.853
21:51:00	6.43125	2.627
22:01:00	6.43819	1.177
22:11:00	6.44514	0.464
22:21:00	6.45208	1.687
22:31:00	6.45903	-0.051
22:41:00	6.46597	2.669
22:51:00	6.47292	-0.612
23:01:00	6.47986	1.627
23:11:00	6.48681	-0.598
23:21:00	6.49375	2.141
23:31:00	6.50069	2.569
23:41:00	6.50764	-0.729
23:51:00	6.51458	1.25
00:01:00	6.52153	1.968
00:11:00	6.52847	2.853
00:21:00	6.53542	0.06
00:31:00	6.54236	0.954
00:41:00	6.54931	-0.326
00:51:00	6.55625	2.425
01:01:00	6.56319	1.804
01:11:00	6.57014	2.084
01:21:00	6.57708	0.286
01:31:00	6.58403	1.367
01:41:00	6.59097	2.675
01:51:00	6.59792	0.231
02:01:00	6.60486	-0.257
02:11:00	6.61181	1.059
02:21:00	6.61875	0.259
02:31:00	6.62569	0.242
02:41:00	6.63264	-1.677
02:51:00	6.63958	-1.009
03:01:00	6.64653	2.226
03:11:00	6.65347	-0.728
03:21:00	6.66042	1.861
03:31:00	6.66736	3.632
03:41:00	6.67431	1.949
03:51:00	6.68125	0.961
04:01:00	6.68819	1.621
04:11:00	6.69514	-0.926
04:21:00	6.70208	1.496
04:31:00	6.70903	0.11
04:41:00	6.71597	-0.497
04:51:00	6.72292	-1.858
05:01:00	6.72986	1.882
05:11:00	6.73681	-0.541
05:21:00	6.74375	-0.417
05:31:00	6.75069	0.877
05:41:00	6.75764	1.058
05:51:00	6.76458	0.216
06:01:00	6.77153	-1.463
06:11:00	6.77847	1.59
06:21:00	6.78542	0.183
06:31:00	6.79236	0.615
06:41:00	6.79931	-0.108
06:51:00	6.80625	-0.353
07:01:00	6.81319	0.647
07:11:00	6.82014	0.085
07:21:00	6.82708	-2.393
07:31:00	6.83403	0.479
07:41:00	6.84097	-1.081
07:51:00	6.84792	-1.451
08:01:00	6.85486	-2.534
08:11:00	6.86181	-1.923
08:21:00	6.86875	1.175
08:31:00	6.87569	0.41
08:41:00	6.88264	-0.607
08:51:00	6.88958	-1.736
09:01:00	6.89653	-2.871
09:11:00	6.90347	-2.412
09:21:00	6.91042	-3.209
09:31:00	6.91736	-0.799
09:41:00	6.92431	0.34
09:51:00	6.93125	-1.011
10:01:00	6.93819	-0.257
10:11:00	6.94514	-2.067
10:21:00	6.95208	-1.395
10:31:00	6.95903	-3.206
10:41:00	6.96597	-1.057
10:51:00	6.97292	-4.084
11:01:00	6.97986	-0.687
11:11:00	6.98681	-3.022
11:21:00	6.99375	-2.605
11:31:00	7.00069	-2.739
11:41:00	7.00764	-2.783
11:51:00	7.01458	-2.172
12:01:00	7.02153	-3.287
12:11:00	7.02847	-0.762
12:21:00	7.03542	-4.022
12:31:00	7.04236	-3.438
12:41:00	7.04931	-3.732
12:51:00	7.05625	-1.723
13:01:00	7.06319	-4.97
13:11:00	7.07014	-3.2
13:21:00	7.07708	-2.455
13:31:00	7.08403	-2.037
13:41:00	7.09097	-5.627
13:51:00	7.09792	-3.805
14:01:00	7.10486	-1.956
14:11:00	7.11181	-3.273
14:21:00	7.11875	-3.507
14:31:00	7.12569	-0.877
14:41:00	7.13264	-3.172
14:51:00	7.13958	-2.24
15:01:00	7.14653	-3.241
15:11:00	7.15347	-2.86

## Sheet: ada-2ko-normalized data
LumiCycle: ada2 ko-FRQ-luc (Baseline subtracted)
Time (hr:min)	Time (days)	counts/sec
12:35:00	1.05208	-10.94
12:45:00	1.05903	-13.39
12:55:00	1.06597	-14.781
13:05:00	1.07292	-15.026
13:15:00	1.07986	-17.936
13:25:00	1.08681	-16.695
13:35:00	1.09375	-21.922
13:45:00	1.10069	-22.362
13:55:00	1.10764	-23.373
14:05:00	1.11458	-25.754
14:15:00	1.12153	-26.058
14:25:00	1.12847	-26.619
14:35:00	1.13542	-28.13
14:45:00	1.14236	-28.455
14:55:00	1.14931	-30.06
15:05:00	1.15625	-29.804
15:15:00	1.16319	-31.332
15:25:00	1.17014	-33.207
15:35:00	1.17708	-30.675
15:45:00	1.18403	-32.017
15:55:00	1.19097	-28.75
16:05:00	1.19792	-32.486
16:15:00	1.20486	-32.656
16:25:00	1.21181	-31.729
16:35:00	1.21875	-33.304
16:45:00	1.22569	-31.608
16:55:00	1.23264	-33.463
17:05:00	1.23958	-31.836
17:15:00	1.24653	-27.976
17:25:00	1.25347	-30.001
17:35:00	1.26042	-29.388
17:45:00	1.26736	-29.24
17:55:00	1.27431	-26.433
18:05:00	1.28125	-26.116
18:15:00	1.28819	-24.524
18:25:00	1.29514	-24.637
18:35:00	1.30208	-22.236
18:45:00	1.30903	-21.018
18:55:00	1.31597	-21.406
19:05:00	1.32292	-17.487
19:15:00	1.32986	-18.674
19:25:00	1.33681	-17.69
19:35:00	1.34375	-16.51
19:45:00	1.35069	-13.108
19:55:00	1.35764	-12.547
20:05:00	1.36458	-11.543
20:15:00	1.37153	-7.144
20:25:00	1.37847	-5.928
20:35:00	1.38542	-3.176
20:45:00	1.39236	-2.87
20:55:00	1.39931	0.338
21:05:00	1.40625	-1.26
21:15:00	1.41319	1.085
21:25:00	1.42014	3.736
21:35:00	1.42708	4.33
21:45:00	1.43403	6.463
21:55:00	1.44097	11.53
22:05:00	1.44792	12.09
22:15:00	1.45486	13.735
22:25:00	1.46181	13.3
22:35:00	1.46875	13.155
22:45:00	1.47569	17.264
22:55:00	1.48264	20.605
23:05:00	1.48958	20.897
23:15:00	1.49653	21.521
23:25:00	1.50347	21.381
23:35:00	1.51042	21.684
23:45:00	1.51736	26.907
23:55:00	1.52431	26.444
00:05:00	1.53125	24.305
00:15:00	1.53819	26.683
00:25:00	1.54514	26.389
00:35:00	1.55208	28.967
00:45:00	1.55903	29.286
00:55:00	1.56597	32.07
01:05:00	1.57292	30.92
01:15:00	1.57986	30.086
01:25:00	1.58681	30.262
01:35:00	1.59375	29.614
01:45:00	1.60069	32.735
01:55:00	1.60764	30.471
02:05:00	1.61458	30.559
02:15:00	1.62153	31.84
02:25:00	1.62847	31.091
02:35:00	1.63542	31.133
02:45:00	1.64236	30.518
02:55:00	1.64931	30.39
03:05:00	1.65625	31.78
03:15:00	1.66319	26.334
03:25:00	1.67014	30.78
03:35:00	1.67708	29.322
03:45:00	1.68403	28.852
03:55:00	1.69097	30.889
04:05:00	1.69792	27.711
04:15:00	1.70486	28.601
04:25:00	1.71181	29.871
04:35:00	1.71875	29.084
04:45:00	1.72569	24.824
04:55:00	1.73264	24.984
05:05:00	1.73958	26.883
05:15:00	1.74653	23.931
05:25:00	1.75347	28.361
05:35:00	1.76042	22.855
05:45:00	1.76736	21.64
05:55:00	1.77431	21.076
06:05:00	1.78125	19.931
06:15:00	1.78819	20.586
06:25:00	1.79514	14.638
06:35:00	1.80208	17.357
06:45:00	1.80903	18.032
06:55:00	1.81597	17.201
07:05:00	1.82292	12.194
07:15:00	1.82986	14.162
07:25:00	1.83681	11.121
07:35:00	1.84375	7.355
07:45:00	1.85069	8.356
07:55:00	1.85764	6.771
08:05:00	1.86458	6.013
08:15:00	1.87153	5.13
08:25:00	1.87847	4.834
08:35:00	1.88542	4.685
08:45:00	1.89236	6.056
08:55:00	1.89931	2.223
09:05:00	1.90625	0.284
09:15:00	1.91319	2.309
09:25:00	1.92014	-2.734
09:35:00	1.92708	-0.968
09:45:00	1.93403	-3.499
09:55:00	1.94097	-1.353
10:05:00	1.94792	-3.234
10:15:00	1.95486	-3.116
10:25:00	1.96181	-4.86
10:35:00	1.96875	-5.854
10:45:00	1.97569	-7.664
10:55:00	1.98264	-6.528
11:05:00	1.98958	-4.676
11:15:00	1.99653	-8.187
11:25:00	2.00347	-6.38
11:35:00	2.01042	-9.061
11:45:00	2.01736	-9.375
11:55:00	2.02431	-7.54
12:05:00	2.03125	-8.791
12:15:00	2.03819	-10.426
12:25:00	2.04514	-11.01
12:35:00	2.05208	-6.907
12:45:00	2.05903	-10.215
12:55:00	2.06597	-9.444
13:05:00	2.07292	-6.042
13:15:00	2.07986	-10.113
13:25:00	2.08681	-9.549
13:35:00	2.09375	-9.548
13:45:00	2.10069	-10.458
13:55:00	2.10764	-8.395
14:05:00	2.11458	-8.58
14:15:00	2.12153	-8.472
14:25:00	2.12847	-6.989
14:35:00	2.13542	-6.416
14:45:00	2.14236	-7.328
14:55:00	2.14931	-6.697
15:05:00	2.15625	-8.278
15:15:00	2.16319	-9.467
15:25:00	2.17014	-7.384
15:35:00	2.17708	-7.292
15:45:00	2.18403	-8.492
15:55:00	2.19097	-7.361
16:05:00	2.19792	-9.56
16:15:00	2.20486	-5.554
16:25:00	2.21181	-7.849
16:35:00	2.21875	-9.647
16:45:00	2.22569	-9.388
16:55:00	2.23264	-8.175
17:05:00	2.23958	-6.838
17:15:00	2.24653	-8.882
17:25:00	2.25347	-7.467
17:35:00	2.26042	-4.884
17:45:00	2.26736	-4.511
17:55:00	2.27431	-3.632
18:05:00	2.28125	-5.733
18:15:00	2.28819	-7.277
18:25:00	2.29514	-6.386
18:35:00	2.30208	-4.918
18:45:00	2.30903	-7.676
18:55:00	2.31597	-7.134
19:05:00	2.32292	-3.629
19:15:00	2.32986	-7.429
19:25:00	2.33681	-7.192
19:35:00	2.34375	-3.557
19:45:00	2.35069	-3.65
19:55:00	2.35764	-7.293
20:05:00	2.36458	-6.519
20:15:00	2.37153	-6.487
20:25:00	2.37847	-5.281
20:35:00	2.38542	-5.555
20:45:00	2.39236	-4.768
20:55:00	2.39931	-8.249
21:05:00	2.40625	-7.033
21:15:00	2.41319	-3.061
21:25:00	2.42014	-5.883
21:35:00	2.42708	-6.182
21:45:00	2.43403	-0.871
21:55:00	2.44097	-7.101
22:05:00	2.44792	-4.759
22:15:00	2.45486	-3.841
22:25:00	2.46181	-6.927
22:35:00	2.46875	-1.227
22:45:00	2.47569	-5.284
22:55:00	2.48264	-6.274
23:05:00	2.48958	-5.758
23:15:00	2.49653	-3.999
23:25:00	2.50347	-2.661
23:35:00	2.51042	-2.326
23:45:00	2.51736	-0.17
23:55:00	2.52431	-3.539
00:05:00	2.53125	-2.241
00:15:00	2.53819	-3.669
00:25:00	2.54514	-1.805
00:35:00	2.55208	-1.836
00:45:00	2.55903	-2.484
00:55:00	2.56597	-1.146
01:05:00	2.57292	0.007
01:15:00	2.57986	-4.146
01:25:00	2.58681	-4.263
01:35:00	2.59375	-0.113
01:45:00	2.60069	-0.478
01:55:00	2.60764	-4.248
02:05:00	2.61458	-1.249
02:15:00	2.62153	-3.928
02:25:00	2.62847	-2.781
02:35:00	2.63542	-0.498
02:45:00	2.64236	-0.945
02:55:00	2.64931	-1.961
03:05:00	2.65625	-2.924
03:15:00	2.66319	-5.107
03:25:00	2.67014	1.973
03:35:00	2.67708	-2.263
03:45:00	2.68403	3.367
03:55:00	2.69097	3.076
04:05:00	2.69792	1.578
04:15:00	2.70486	0.433
04:25:00	2.71181	2.397
04:35:00	2.71875	-0.2
04:45:00	2.72569	-3.944
04:55:00	2.73264	-0.848
05:05:00	2.73958	1.739
05:15:00	2.74653	-0.353
05:25:00	2.75347	0.954
05:35:00	2.76042	1.183
05:45:00	2.76736	-0.746
05:55:00	2.77431	0.672
06:05:00	2.78125	2.209
06:15:00	2.78819	1.501
06:25:00	2.79514	2.298
06:35:00	2.80208	1.836
06:45:00	2.80903	2.729
06:55:00	2.81597	2.125
07:05:00	2.82292	2.947
07:15:00	2.82986	4.276
07:25:00	2.83681	4.596
07:35:00	2.84375	0.902
07:45:00	2.85069	3.447
07:55:00	2.85764	5.8
08:05:00	2.86458	2.961
08:15:00	2.87153	5.061
08:25:00	2.87847	1.751
08:35:00	2.88542	3.18
08:45:00	2.89236	3.769
08:55:00	2.89931	3.403
09:05:00	2.90625	0.295
09:15:00	2.91319	1.314
09:25:00	2.92014	5.72
09:35:00	2.92708	6.338
09:45:00	2.93403	1.67
09:55:00	2.94097	3.82
10:05:00	2.94792	3.287
10:15:00	2.95486	3.603
10:25:00	2.96181	2.32
10:35:00	2.96875	1.444
10:45:00	2.97569	6.295
10:55:00	2.98264	5.225
11:05:00	2.98958	5.123
11:15:00	2.99653	1.84
11:25:00	3.00347	4.584
11:35:00	3.01042	2.379
11:45:00	3.01736	1.801
11:55:00	3.02431	5.171
12:05:00	3.03125	5.327
12:15:00	3.03819	2.282
12:25:00	3.04514	0.327
12:35:00	3.05208	3.264
12:45:00	3.05903	2.608
12:55:00	3.06597	1.03
13:05:00	3.07292	0.989
13:15:00	3.07986	3.48
13:25:00	3.08681	0.47
13:35:00	3.09375	-0.141
13:45:00	3.10069	-0.62
13:55:00	3.10764	0.133
14:05:00	3.11458	2.971
14:15:00	3.12153	1.185
14:25:00	3.12847	-3.009
14:35:00	3.13542	2.774
14:45:00	3.14236	4.848
14:55:00	3.14931	2.025
15:05:00	3.15625	2.505
15:15:00	3.16319	0.006
15:25:00	3.17014	2.541
15:35:00	3.17708	-1.576
15:45:00	3.18403	1.337
15:55:00	3.19097	2.804
16:05:00	3.19792	1.596
16:15:00	3.20486	-1.269
16:25:00	3.21181	-0.12
16:35:00	3.21875	-1.485
16:45:00	3.22569	-0.576
16:55:00	3.23264	5.335
17:05:00	3.23958	0.553
17:15:00	3.24653	0.509
17:25:00	3.25347	0.013
17:35:00	3.26042	0.353
17:45:00	3.26736	0.257
17:55:00	3.27431	-2.635
18:05:00	3.28125	0.39
18:15:00	3.28819	0.612
18:25:00	3.29514	1.806
18:35:00	3.30208	-2.958
18:45:00	3.30903	1.329
18:55:00	3.31597	-1.606
19:05:00	3.32292	-0.099
19:15:00	3.32986	-2.767
19:25:00	3.33681	1.852
19:35:00	3.34375	1.889
19:45:00	3.35069	-1.061
19:55:00	3.35764	0.646
20:05:00	3.36458	0.425
20:15:00	3.37153	0.522
20:25:00	3.37847	2.05
20:35:00	3.38542	0.02
20:45:00	3.39236	-1.712
20:55:00	3.39931	0.846
21:05:00	3.40625	-1.679
21:15:00	3.41319	2.775
21:25:00	3.42014	1.697
21:35:00	3.42708	0.008
21:45:00	3.43403	0.575
21:55:00	3.44097	1.824
22:05:00	3.44792	-1.095
22:15:00	3.45486	0.288
22:25:00	3.46181	-2.874
22:35:00	3.46875	0.966
22:45:00	3.47569	0.581
22:55:00	3.48264	-2.596
23:05:00	3.48958	3.645
23:15:00	3.49653	1.874
23:25:00	3.50347	0.232
23:35:00	3.51042	-0.876
23:45:00	3.51736	0.135
23:55:00	3.52431	1.672
00:05:00	3.53125	1.721
00:15:00	3.53819	1.51
00:25:00	3.54514	-2.235
00:35:00	3.55208	-1.995
00:45:00	3.55903	1.649
00:55:00	3.56597	1.376
01:05:00	3.57292	1.349
01:15:00	3.57986	0.489
01:25:00	3.58681	-0.973
01:35:00	3.59375	2.621
01:45:00	3.60069	-0.509
01:55:00	3.60764	1.264
02:05:00	3.61458	1.666
02:15:00	3.62153	2.996
02:25:00	3.62847	0.195
02:35:00	3.63542	2.51
02:45:00	3.64236	4.819
02:55:00	3.64931	1.946
03:05:00	3.65625	0.895
03:15:00	3.66319	3.877
03:25:00	3.67014	3.013
03:35:00	3.67708	0.346
03:45:00	3.68403	2.57
03:55:00	3.69097	3.786
04:05:00	3.69792	0.726
04:15:00	3.70486	3.383
04:25:00	3.71181	6.193
04:35:00	3.71875	4.458
04:45:00	3.72569	2.264
04:55:00	3.73264	2.914
05:05:00	3.73958	5.037
05:15:00	3.74653	0.751
05:25:00	3.75347	1.598
05:35:00	3.76042	3.81
05:45:00	3.76736	2.486
05:55:00	3.77431	1.408
06:05:00	3.78125	3.977
06:15:00	3.78819	5.611
06:25:00	3.79514	5.265
06:35:00	3.80208	4.338
06:45:00	3.80903	2.679
06:55:00	3.81597	0.357
07:05:00	3.82292	6.255
07:15:00	3.82986	3.489
07:25:00	3.83681	4.67
07:35:00	3.84375	1.961
07:45:00	3.85069	3.595
07:55:00	3.85764	4.082
08:05:00	3.86458	1.355
08:15:00	3.87153	1.632
08:25:00	3.87847	1.851
08:35:00	3.88542	0.345
08:45:00	3.89236	2.75
08:55:00	3.89931	2.173
09:05:00	3.90625	-0.068
09:15:00	3.91319	3.314
09:25:00	3.92014	2.878
09:35:00	3.92708	0.976
09:45:00	3.93403	3.043
09:55:00	3.94097	1.683
10:05:00	3.94792	2.402
10:15:00	3.95486	0.557
10:25:00	3.96181	-1.679
10:35:00	3.96875	2.438
10:45:00	3.97569	2.875
10:55:00	3.98264	0.9
11:05:00	3.98958	-1.677
11:15:00	3.99653	1.731
11:25:00	4.00347	-0.214
11:35:00	4.01042	-3.37
11:45:00	4.01736	0.774
11:55:00	4.02431	-1.915
12:05:00	4.03125	-0.785
12:15:00	4.03819	-1.446
12:25:00	4.04514	-3.375
12:35:00	4.05208	-6.173
12:45:00	4.05903	-3.284
12:55:00	4.06597	-1.651
13:05:00	4.07292	-0.68
13:15:00	4.07986	-3.584
13:25:00	4.08681	-0.902
13:35:00	4.09375	-4.291
13:45:00	4.10069	-2.481
13:55:00	4.10764	-0.195
14:05:00	4.11458	-2.685
14:15:00	4.12153	-4.689
14:25:00	4.12847	-6.118
14:35:00	4.13542	2.652
14:45:00	4.14236	-1.042
14:55:00	4.14931	-1.869
15:05:00	4.15625	-2.593
15:15:00	4.16319	1.108
15:25:00	4.17014	-1.651
15:35:00	4.17708	-5.691
15:45:00	4.18403	0.736
15:55:00	4.19097	-6.18
16:05:00	4.19792	-2.123
16:15:00	4.20486	-1.108
16:25:00	4.21181	-2.133
16:35:00	4.21875	-1.911
16:45:00	4.22569	-3.234
16:55:00	4.23264	-0.468
17:05:00	4.23958	-1.7
17:15:00	4.24653	-3.79
17:25:00	4.25347	-4.981
17:35:00	4.26042	0.092
17:45:00	4.26736	1.677
17:55:00	4.27431	-1.811
18:05:00	4.28125	-1.368
18:15:00	4.28819	1.896
18:25:00	4.29514	-2.615
18:35:00	4.30208	-0.997
18:45:00	4.30903	0.944
18:55:00	4.31597	2.786
19:05:00	4.32292	-1.513
19:15:00	4.32986	-2.722
19:25:00	4.33681	2.975
19:35:00	4.34375	3.465
19:45:00	4.35069	-2.494
19:55:00	4.35764	1.826
20:05:00	4.36458	-0.796
20:15:00	4.37153	0.354
20:25:00	4.37847	1.742
20:35:00	4.38542	1.536
20:45:00	4.39236	0.089
20:55:00	4.39931	0.521
21:05:00	4.40625	0.707
21:15:00	4.41319	1.045
21:25:00	4.42014	-3.181
21:35:00	4.42708	0.115
21:45:00	4.43403	3.633
21:55:00	4.44097	5.397
22:05:00	4.44792	1.15
22:15:00	4.45486	4.724
22:25:00	4.46181	5.326
22:35:00	4.46875	0.842
22:45:00	4.47569	0.543
22:55:00	4.48264	4.45
23:05:00	4.48958	0.739
23:15:00	4.49653	3.391
23:25:00	4.50347	3.933
23:35:00	4.51042	0.013
23:45:00	4.51736	5.903
23:55:00	4.52431	1.151
00:05:00	4.53125	3.378
00:15:00	4.53819	3.997
00:25:00	4.54514	6.847
00:35:00	4.55208	4.21
00:45:00	4.55903	4.886
00:55:00	4.56597	4.009
01:05:00	4.57292	-0.282
01:15:00	4.57986	2.006
01:25:00	4.58681	2.793
01:35:00	4.59375	1.809
01:45:00	4.60069	2.033
01:55:00	4.60764	4.15
02:05:00	4.61458	5.211
02:15:00	4.62153	3.6
02:25:00	4.62847	2.781
02:35:00	4.63542	7.076
02:45:00	4.64236	4.995
02:55:00	4.64931	3.804
03:05:00	4.65625	4.419
03:15:00	4.66319	3.752
03:25:00	4.67014	2.941
03:35:00	4.67708	1.453
03:45:00	4.68403	0.249
03:55:00	4.69097	2.292
04:05:00	4.69792	-0.511
04:15:00	4.70486	1.676
04:25:00	4.71181	2.243
04:35:00	4.71875	1.737
04:45:00	4.72569	0.256
04:55:00	4.73264	-0.614
05:05:00	4.73958	2.604
05:15:00	4.74653	4.8
05:25:00	4.75347	3.96
05:35:00	4.76042	3.093
05:45:00	4.76736	-0.435
05:55:00	4.77431	5.683
06:05:00	4.78125	4.548
06:15:00	4.78819	2.547
06:25:00	4.79514	-0.86
06:35:00	4.80208	-0.351
06:45:00	4.80903	-0.633
06:55:00	4.81597	0.171
07:05:00	4.82292	0.542
07:15:00	4.82986	0.384
07:25:00	4.83681	0.904
07:35:00	4.84375	-3.198
07:45:00	4.85069	3.325
07:55:00	4.85764	1.934
08:05:00	4.86458	-1.098
08:15:00	4.87153	-2.707
08:25:00	4.87847	0.487
08:35:00	4.88542	1.943
08:45:00	4.89236	1.604
08:55:00	4.89931	-3.621
09:05:00	4.90625	-3.087
09:15:00	4.91319	-0.835
09:25:00	4.92014	1.137
09:35:00	4.92708	-1.695
09:45:00	4.93403	2.129
09:55:00	4.94097	-0.74
10:05:00	4.94792	0.719
10:15:00	4.95486	0.361
10:25:00	4.96181	-2.356
10:35:00	4.96875	0.704
10:45:00	4.97569	-1.145
10:55:00	4.98264	0.633
11:05:00	4.98958	-1.462
11:15:00	4.99653	0.715
11:25:00	5.00347	-0.841
11:35:00	5.01042	0.853
11:45:00	5.01736	-0.255
11:55:00	5.02431	-0.7
12:05:00	5.03125	0.152
12:15:00	5.03819	1.846
12:25:00	5.04514	3.536
12:35:00	5.05208	0.679
12:45:00	5.05903	1.761
12:55:00	5.06597	1.019
13:05:00	5.07292	-0.59
13:15:00	5.07986	-2.419
13:25:00	5.08681	-2.735
13:35:00	5.09375	1.29
13:45:00	5.10069	0.06
13:55:00	5.10764	-1.331
14:05:00	5.11458	-1.121
14:15:00	5.12153	1.215
14:25:00	5.12847	-3.465
14:35:00	5.13542	0.6
14:45:00	5.14236	1.511
14:55:00	5.14931	1.658
15:05:00	5.15625	1.523
15:15:00	5.16319	3.219
15:25:00	5.17014	-1.577
15:35:00	5.17708	-1.34
15:45:00	5.18403	1.051
15:55:00	5.19097	-0.34
16:05:00	5.19792	-0.424
16:15:00	5.20486	1.796
16:25:00	5.21181	0.436
16:35:00	5.21875	2.749
16:45:00	5.22569	1.888
16:55:00	5.23264	0.787
17:05:00	5.23958	0.33
17:15:00	5.24653	-0.237
17:25:00	5.25347	-0.015
17:35:00	5.26042	-0.834
17:45:00	5.26736	1.773
17:55:00	5.27431	-1.165
18:05:00	5.28125	0.524
18:15:00	5.28819	-0.359
18:25:00	5.29514	-0.714
18:35:00	5.30208	1.425
18:45:00	5.30903	-1.378
18:55:00	5.31597	0.628
19:05:00	5.32292	-0.267
19:15:00	5.32986	3.714
19:25:00	5.33681	0.326
19:35:00	5.34375	3.04
19:45:00	5.35069	0.925
19:55:00	5.35764	-0.326
20:05:00	5.36458	0.704
20:15:00	5.37153	4.113
20:25:00	5.37847	1.934
20:35:00	5.38542	6.819
20:45:00	5.39236	3.211
20:55:00	5.39931	1.06
21:05:00	5.40625	-0.425
21:15:00	5.41319	-1.227
21:25:00	5.42014	-0.855
21:35:00	5.42708	1.041
21:45:00	5.43403	2.178
21:55:00	5.44097	1.153
22:05:00	5.44792	0.49
22:15:00	5.45486	0.201
22:25:00	5.46181	1.98
22:35:00	5.46875	1.803
22:45:00	5.47569	0.288
22:55:00	5.48264	-0.174
23:05:00	5.48958	0.068
23:15:00	5.49653	1.595
23:25:00	5.50347	0.667
23:35:00	5.51042	0.374
23:45:00	5.51736	2.749
23:55:00	5.52431	-0.2
00:05:00	5.53125	-0.186
00:15:00	5.53819	0.269
00:25:00	5.54514	1.597
00:35:00	5.55208	0.127
00:45:00	5.55903	2.919
00:55:00	5.56597	-3.187
01:05:00	5.57292	-0.227
01:15:00	5.57986	0.097
01:25:00	5.58681	3.004
01:35:00	5.59375	-2.352
01:45:00	5.60069	0.991
01:55:00	5.60764	0.296
02:05:00	5.61458	-0.708
02:15:00	5.62153	-3.438
02:25:00	5.62847	-2.194
02:35:00	5.63542	0.189
02:45:00	5.64236	-2.21
02:55:00	5.64931	-0.175
03:05:00	5.65625	1.003
03:15:00	5.66319	4.564
03:25:00	5.67014	-0.341
03:35:00	5.67708	0.23
03:45:00	5.68403	0.311
03:55:00	5.69097	0.475
04:05:00	5.69792	2.259
04:15:00	5.70486	-0.759
04:25:00	5.71181	-1.686
04:35:00	5.71875	-1.873
04:45:00	5.72569	2.794
04:55:00	5.73264	2.939
05:05:00	5.73958	-1.832
05:15:00	5.74653	1.13
05:25:00	5.75347	-1.993
05:35:00	5.76042	-1.506
05:45:00	5.76736	0.122
05:55:00	5.77431	0.897
06:05:00	5.78125	-0.178
06:15:00	5.78819	-2.827
06:25:00	5.79514	2.884
06:35:00	5.80208	2.658
06:45:00	5.80903	0.115
06:55:00	5.81597	1.226
07:05:00	5.82292	4.602
07:15:00	5.82986	0.115
07:25:00	5.83681	-0.868
07:35:00	5.84375	-1.161
07:45:00	5.85069	2.215
07:55:00	5.85764	-1.311
08:05:00	5.86458	-1.455
08:15:00	5.87153	1.234
08:25:00	5.87847	2.013
08:35:00	5.88542	2.052
08:45:00	5.89236	0.759
08:55:00	5.89931	2.468
09:05:00	5.90625	0.853
09:15:00	5.91319	2.286
09:25:00	5.92014	3.028
09:35:00	5.92708	2.737
09:45:00	5.93403	3.142
09:55:00	5.94097	-1.561
10:05:00	5.94792	-0.657
10:15:00	5.95486	-0.857
10:25:00	5.96181	-0.77
10:35:00	5.96875	-1.828
10:45:00	5.97569	3.114
10:55:00	5.98264	0.811
11:05:00	5.98958	-0.946
11:15:00	5.99653	0.871
11:25:00	6.00347	-4.37
11:35:00	6.01042	-0.213
11:45:00	6.01736	1.293
11:55:00	6.02431	1.591
12:05:00	6.03125	0.453
12:15:00	6.03819	2.572
12:25:00	6.04514	-0.133
12:35:00	6.05208	4.272
12:45:00	6.05903	-1.289
12:55:00	6.06597	-0.216
13:05:00	6.07292	1.202
13:15:00	6.07986	-1.027
13:25:00	6.08681	-0.253
13:35:00	6.09375	2.234
13:45:00	6.10069	1.804
13:55:00	6.10764	-3.482
14:05:00	6.11458	-2.094
14:15:00	6.12153	-1.702
14:25:00	6.12847	1.224
14:35:00	6.13542	1.522
14:45:00	6.14236	-0.008
14:55:00	6.14931	-0.662
15:05:00	6.15625	-2.389
15:15:00	6.16319	-0.002
15:25:00	6.17014	1.282
15:35:00	6.17708	0.081
15:45:00	6.18403	-0.78
15:55:00	6.19097	-0.536
16:05:00	6.19792	-0.881
16:15:00	6.20486	-1.104
16:25:00	6.21181	-1.983
16:35:00	6.21875	-3.505
16:45:00	6.22569	1.531
16:55:00	6.23264	-2.75
17:05:00	6.23958	1.827
17:15:00	6.24653	-2.638
17:25:00	6.25347	-3.316
17:35:00	6.26042	-3.024
17:45:00	6.26736	-2.851
17:55:00	6.27431	0.097
18:05:00	6.28125	-1.749
18:15:00	6.28819	-1.472
18:25:00	6.29514	-2.338
18:35:00	6.30208	-0.459
18:45:00	6.30903	-1.134
18:55:00	6.31597	-2.57
19:05:00	6.32292	-3.586
19:15:00	6.32986	-1.565
19:25:00	6.33681	3.179
19:35:00	6.34375	-1.001
19:45:00	6.35069	-3.39
19:55:00	6.35764	-0.309
20:05:00	6.36458	-0.376
20:15:00	6.37153	-1.911
20:25:00	6.37847	0.385
20:35:00	6.38542	-0.199
20:45:00	6.39236	-3.005
20:55:00	6.39931	-3.794
21:05:00	6.40625	-1.036
21:15:00	6.41319	0.036
21:25:00	6.42014	-0.57
21:35:00	6.42708	2.588
21:45:00	6.43403	-0.017
21:55:00	6.44097	-1.386
22:05:00	6.44792	-1.08
22:15:00	6.45486	-0.724
22:25:00	6.46181	0.596
22:35:00	6.46875	0.178
22:45:00	6.47569	0.064
22:55:00	6.48264	-0.207
23:05:00	6.48958	-0.289
23:15:00	6.49653	-1
23:25:00	6.50347	-1.275
23:35:00	6.51042	2.989
23:45:00	6.51736	-2.567
23:55:00	6.52431	-0.033
00:05:00	6.53125	0.063
00:15:00	6.53819	5.778
00:25:00	6.54514	3.896
00:35:00	6.55208	-0.224
00:45:00	6.55903	-0.693
00:55:00	6.56597	1.198
01:05:00	6.57292	-0.876
01:15:00	6.57986	0.987
01:25:00	6.58681	-0.388
01:35:00	6.59375	1.452
01:45:00	6.60069	-0.697
01:55:00	6.60764	0.269
02:05:00	6.61458	1.452
02:15:00	6.62153	1.042
02:25:00	6.62847	0.428
02:35:00	6.63542	2.153
02:45:00	6.64236	0.399
02:55:00	6.64931	2.706
03:05:00	6.65625	0.87
03:15:00	6.66319	1.006
03:25:00	6.67014	0.958
03:35:00	6.67708	0.749
03:45:00	6.68403	-0.923
03:55:00	6.69097	0.476
04:05:00	6.69792	1.508
04:15:00	6.70486	1.03
04:25:00	6.71181	3.398
04:35:00	6.71875	-0.861
04:45:00	6.72569	-0.872
04:55:00	6.73264	0.905
05:05:00	6.73958	-1.312
05:15:00	6.74653	1.321
05:25:00	6.75347	4.569
05:35:00	6.76042	1.438
05:45:00	6.76736	0.192
05:55:00	6.77431	-1.893
06:05:00	6.78125	3.154
06:15:00	6.78819	2.973
06:25:00	6.79514	2.692
06:35:00	6.80208	1.996
06:45:00	6.80903	-0.682
06:55:00	6.81597	-1.569
07:05:00	6.82292	2.655
07:15:00	6.82986	1.016
07:25:00	6.83681	3.828
07:35:00	6.84375	0.853
07:45:00	6.85069	2.099
07:55:00	6.85764	-1.357
08:05:00	6.86458	1.121
08:15:00	6.87153	-1.123
08:25:00	6.87847	-0.295
08:35:00	6.88542	1.719
08:45:00	6.89236	-1.632
08:55:00	6.89931	0.558
09:05:00	6.90625	1.053
09:15:00	6.91319	1.903
09:25:00	6.92014	-0.291
09:35:00	6.92708	0.698
09:45:00	6.93403	0.183
09:55:00	6.94097	-2.478
10:05:00	6.94792	-1.766
10:15:00	6.95486	2.927
10:25:00	6.96181	-3.142
10:35:00	6.96875	-1.846
10:45:00	6.97569	2.322
10:55:00	6.98264	0.727
11:05:00	6.98958	-1.596
11:15:00	6.99653	0.645
11:25:00	7.00347	-5.209
11:35:00	7.01042	-0.128
11:45:00	7.01736	-1.625
11:55:00	7.02431	1.731
12:05:00	7.03125	-3.264
12:15:00	7.03819	0.764
12:25:00	7.04514	-1.519
12:35:00	7.05208	-2.741
12:45:00	7.05903	0.271
12:55:00	7.06597	-4.206
13:05:00	7.07292	-0.453
13:15:00	7.07986	-2.086
13:25:00	7.08681	-3.702
13:35:00	7.09375	1.319
13:45:00	7.10069	-3.623
13:55:00	7.10764	0.625
14:05:00	7.11458	-1.935
14:15:00	7.12153	-1.74
14:25:00	7.12847	0.571
14:35:00	7.13542	-0.52
14:45:00	7.14236	0.129
14:55:00	7.14931	-3.068
