# Supplementary material for: The nutrient-sensing GCN2 signaling pathway is essential for circadian clock function by regulating histone acetylation under amino acid starvation
Source: eLife journal article supplement (doi:10.7554/elife.85241), 2023-04-21
Supplement: fig5-figsupp1-data3 [file Figure 5-figure supplement 1-source data 3-4.xlsx]

## Sheet: FRQ rhythm+0mM 3-AT
Hrs in DD	WT	WT	WT	ada-2KO	ada-2KO	ada-2KO
0	1	1	1	0.920969	0.984653	1.02099
4	0.843114	0.71741	0.660583	0.781968	0.713959	0.665046
8	0.319503	0.401311	0.357311	0.30837	0.38894	0.302156
12	0.158531	0.264491	0.23805	0.128531	0.194501	0.06717
16	0.3918	0.430838	0.352891	0.097244	0.130885	0.056958
20	0.362968	0.480126	0.546142	0.148519	0.202967	0.138593
24	0.410834	0.481032	0.555558	0.054855	0.247892	0.185238
28	0.446373	0.242166	0.398419	0.069839	0.221492	0.164835
32	0.430919	0.331092	0.290974	0.073877	0.1757	0.135837
36	0.290263	0.395373	0.32173	0.175721	0.129184	0.144517
40	0.554319	0.599441	0.624188	0.209859	0.248456	0.219516
44	0.708115	0.608379	0.653392	0.351457	0.34598	0.397172
48	0.543805	0.471078	0.478514	0.364878	0.483712	0.409658
