# Supplementary material for: The nutrient-sensing GCN2 signaling pathway is essential for circadian clock function by regulating histone acetylation under amino acid starvation
Source: eLife journal article supplement (doi:10.7554/elife.85241), 2023-04-21
Supplement: fig5-figsupp1-data5 [file Figure 5-figure supplement 1-source data 5.xlsx]

## Sheet: frq rhythm-WT VS ada2KO+3mM 3AT
Hrs in DD	WT	WT	WT	ada-2KO	ada-2KO	ada-2KO
0	1	1	1	1.20533	1.09218	1.19408
4	0.375284	0.288096	0.291536	0.185557	0.19102	0.123425
8	0.346422	0.360147	0.415124	0.228798	0.215253	0.142381
12	0.448919	0.39974	0.354511	0.325389	0.413707	0.255171
16	0.664292	0.668519	0.733038	0.453014	0.472242	0.391022
20	0.454375	0.660026	0.450427	0.261544	0.40322	0.200713
24	0.368747	0.378661	0.377775	0.211702	0.330714	0.154563
28	0.313207	0.268736	0.263434	0.254962	0.261379	0.185525
32	0.272369	0.500931	0.273311	0.281552	0.302897	0.315682
36	0.386316	0.46189	0.384026	0.364985	0.37027	0.351976
40	0.710438	0.729914	0.724281	0.513259	0.524389	0.556746
44	0.595163	0.723417	0.663686	0.303383	0.478072	0.430525
48	0.474747	0.334719	0.463943	0.386463	0.387652	0.430624
