# Supplementary material for: The nutrient-sensing GCN2 signaling pathway is essential for circadian clock function by regulating histone acetylation under amino acid starvation
Source: eLife journal article supplement (doi:10.7554/elife.85241), 2023-04-21
Supplement: fig6-data1 [file elife-85241-fig6-data1-v2.zip]

## Sheet: H3ac-ChIP-WT gcn-5KO and hda-1
Hrs in DD	WT	WT	WT	gcn-5KO	gcn-5KO	gcn-5KO	hda-1KO	hda-1KO	hda-1KO
DD18h	0.161143	0.167793	0.18164	0.111504	0.114327	0.09797	0.518608	0.692052	0.362144
