# Supplementary material for: The nutrient-sensing GCN2 signaling pathway is essential for circadian clock function by regulating histone acetylation under amino acid starvation
Source: eLife journal article supplement (doi:10.7554/elife.85241), 2023-04-21
Supplement: fig7-data2 [file Figure 7-source data 2.xls]

## Sheet: cpc-1 VS cpc1+12mM 3-AT
gene_id	average_FPKM_C0	average_FPKM_C12	log2FC	pvalue	padj		up_exp	2232
NCU09210	198.635	0.648695	-8.07248	1.39353e-88	1.93543e-86		down_exp	2176
NCU05914	21.4766	0.0708387	-7.8915	7.38355e-11	4.90527e-10
NCU08457	199.545	1.52214	-6.85038	1.30851e-112	3.85279e-110
NCU04743	10.4271	0.0778783	-6.73347	1.29254e-14	1.23724e-13
NCU09444	1.75789	0	-6.50717	4.3378e-07	1.8827e-06
NCU06364	28.4676	0.2865	-6.49209	1.20444e-21	1.91075e-20
NCU05712	14.8966	0	-6.47753	2.84163e-09	1.5943e-08
NCU09274	12.5883	0.119292	-6.47104	8.16038e-12	5.99487e-11
NCU08397	10.0542	0.139972	-6.08817	4.84589e-17	5.591e-16
NCU11212	33.0308	0.481917	-5.93849	6.93082e-18	8.54568e-17
NCU09041	301.975	4.8569	-5.93531	2.77792e-106	6.39009e-104
NCU06911	47.1921	0.664409	-5.85839	6.64221e-23	1.13705e-21
NCU04197	9.75519	0.164067	-5.82353	4.54755e-06	1.69921e-05
NCU09209	118.809	1.85441	-5.82042	5.55199e-94	8.88439e-92
NCU01424	187.096	2.80575	-5.69004	5.81112e-91	8.38759e-89
NCU04487	76.0013	1.13849	-5.64624	7.91907e-54	4.44979e-52
NCU07736	9.09692	0.119335	-5.59714	1.66639e-14	1.57462e-13
NCU06912	97.9328	1.8207	-5.51527	1.07007e-77	1.14157e-75
NCU04805	21.4639	0.421893	-5.50166	4.37486e-26	9.14867e-25
NCU00102	107.479	2.27659	-5.44307	3.56257e-110	9.04278e-108
NCU00790	127.313	2.66607	-5.41019	4.45598e-15	4.48094e-14
NCU00265	156.639	3.63693	-5.39044	2.31363e-14	2.15578e-13
NCU07083	3.16118	0.0596027	-5.3312	3.39727e-06	1.29103e-05
NCU00848	54.6028	1.25279	-5.30927	9.71025e-70	8.61171e-68
NCU10014	36.4783	0.872445	-5.27317	8.50068e-44	3.34618e-42
NCU04816	17.9743	0.415123	-5.26151	1.56121e-20	2.2847e-19
NCU06265	49.7315	1.17415	-5.227	4.86157e-64	3.54317e-62
NCU05259	937.829	24.522	-5.17519	6.87293e-141	4.21597e-138
NCU02184	33.8592	0.949866	-5.12967	7.11479e-76	7.27388e-74
NCU00985	7.65903	0.253959	-5.06202	2.07606e-12	1.6285e-11
NCU08099	12.6276	0.317791	-5.05569	1.50384e-09	8.75774e-09
NCU00187	14.6065	0.370216	-5.04613	1.2752e-14	1.22224e-13
NCU08549	33.3358	0.975144	-4.95856	4.79866e-33	1.35857e-31
NCU09659	43.8782	1.35162	-4.94999	8.63116e-56	5.2077e-54
NCU08418	46.0858	1.63724	-4.87842	1.35322e-12	1.07571e-11
NCU06803	17.549	0.627836	-4.80944	1.18458e-25	2.42213e-24
NCU05909	1.40026	0.0516743	-4.80475	0.000334225	0.000910522
NCU04446	6.97636	0.055424	-4.79488	3.40438e-09	1.89272e-08
NCU04815	57.789	1.96714	-4.78091	6.73697e-51	3.37353e-49
NCU05831	12.4434	0.409769	-4.67308	7.30346e-19	9.58302e-18
NCU07802	14.8804	0.471655	-4.6682	2.35683e-23	4.13062e-22
NCU08949	416.732	15.5379	-4.66458	4.81574e-105	1.0742e-102
NCU08976	211.247	7.95338	-4.65093	3.37443e-100	6.71329e-98
NCU04510	58.4499	2.14683	-4.58874	1.33013e-40	4.94498e-39
NCU16555	26.2941	0.80233	-4.55541	1.63431e-23	2.94136e-22
NCU02932	17.075	0.605032	-4.54966	7.92018e-20	1.11901e-18
NCU01579	4.31337	0.211538	-4.48719	0.000126202	0.000371077
NCU07452	41.0167	1.57976	-4.45513	1.53095e-44	6.2957e-43
NCU06140	4.01069	0.164043	-4.44119	1.13617e-07	5.28657e-07
NCU09040	11.7113	0.563958	-4.42154	4.74051e-14	4.29211e-13
NCU06603	47.0377	2.16299	-4.40067	4.14926e-36	1.3165e-34
NCU00304	57.0231	2.22797	-4.3771	2.76303e-61	1.88321e-59
NCU01993	16.7212	0.729332	-4.30617	1.60152e-31	4.28684e-30
NCU08199	10.9155	0.5162	-4.28532	1.08639e-13	9.57713e-13
NCU08087	2.46176	0.137646	-4.25885	0.000275856	0.000763373
NCU00245	5.69679	0	-4.24872	9.43472e-07	3.89725e-06
NCU08793	4.61428	0.192557	-4.18037	3.14058e-10	1.95252e-09
NCU01510	34.7875	1.92398	-4.17045	1.64465e-89	2.32812e-87
NCU02343	3.94746	0.259643	-4.1571	2.64495e-09	1.48849e-08
NCU09273	12.9879	0.765267	-4.12701	1.36363e-14	1.29518e-13
NCU08738	47.228	2.61928	-4.1177	3.07469e-50	1.52924e-48
NCU00849	3.74641	0.157054	-4.0887	2.58582e-05	8.57115e-05
NCU00684	30.04	1.81012	-4.08507	8.06214e-49	3.82874e-47
NCU03078	6.28981	0.395675	-4.07128	3.24059e-11	2.23561e-10
NCU09345	3879.93	226.481	-4.06604	6.32537e-52	3.21111e-50
NCU03948	11.7323	0.671166	-4.05694	2.63906e-18	3.36092e-17
NCU14019	6.18303	0.354699	-4.05585	1.35252e-06	5.44334e-06
NCU05154	13.3292	0.785406	-4.0434	3.41595e-39	1.20889e-37
NCU00748	67.2599	3.84542	-4.00874	2.06732e-61	1.4222e-59
NCU07696	80.149	4.42693	-4.00748	2.00632e-42	7.69193e-41
NCU05163	20.8655	0.97733	-3.98967	6.29594e-13	5.18394e-12
NCU09933	37.1662	2.49304	-3.97493	4.54242e-29	1.12204e-27
NCU16742	27.7643	1.70946	-3.96199	3.45595e-22	5.6784e-21
NCU04907	317.671	18.372	-3.95826	1.01574e-110	2.6703e-108
NCU00949	0.60005	0.0317813	-3.95682	3.9601e-06	1.49106e-05
NCU09478	5.39796	0.369988	-3.93954	2.91405e-07	1.29219e-06
NCU01861	5.20391	0.34325	-3.93011	3.51237e-07	1.53988e-06
NCU16859	5.84658	0.506985	-3.90803	1.3733e-10	8.87518e-10
NCU04909	27.4434	1.70762	-3.88637	1.37387e-30	3.58619e-29
NCU04904	43.6898	2.76445	-3.87871	5.61516e-58	3.59419e-56
NCU06137	4.62741	0.187077	-3.87612	7.25764e-08	3.44668e-07
NCU07305	31.5032	1.94157	-3.86314	5.73234e-48	2.65382e-46
NCU08269	260.893	17.5193	-3.81873	4.66638e-79	5.12675e-77
NCU11249	24.4765	1.60928	-3.81774	9.46252e-31	2.47878e-29
NCU07891	2.686	0.19179	-3.81486	1.0392e-05	3.67237e-05
NCU06597	27.4748	1.40797	-3.81462	3.95175e-14	3.62252e-13
NCU06773	12.3264	0.796656	-3.79036	1.26476e-24	2.43078e-23
NCU00850	10.0204	0.629747	-3.73694	1.13459e-09	6.68138e-09
NCU11046	13.7038	0.777485	-3.72124	2.54817e-13	2.16345e-12
NCU01320	33.9583	1.50036	-3.72052	2.37823e-19	3.21804e-18
NCU06512	1024.66	75.6087	-3.69869	4.05297e-64	2.98339e-62
NCU04987	44.1207	2.37299	-3.69124	2.60137e-33	7.45673e-32
NCU04533	63.7288	3.60336	-3.6883	1.56999e-27	3.53417e-26
NCU09874	53.751	3.86818	-3.68542	1.5534e-66	1.27051e-64
NCU09272	4.97423	0.402477	-3.65513	4.09251e-13	3.40395e-12
NCU00144	37.8252	2.81101	-3.64075	1.30333e-77	1.37054e-75
NCU05133	49.5458	3.62614	-3.63097	1.42428e-52	7.59719e-51
NCU04097	65.0725	3.60802	-3.62131	1.52187e-54	8.82083e-53
NCU01926	4.26222	0.328686	-3.61035	1.18623e-08	6.184e-08
NCU09693	735.611	59.3699	-3.60965	1.89122e-13	1.63395e-12
NCU00754	22.399	1.8285	-3.60669	1.96294e-23	3.47337e-22
NCU06305	85.5258	6.61993	-3.59318	1.70368e-69	1.45823e-67
NCU09285	34.1587	2.89938	-3.55597	2.48231e-39	8.82717e-38
NCU08351	24.4229	0.519683	-3.54537	3.83699e-12	2.91176e-11
NCU03383	126.368	10.5999	-3.53462	1.36654e-46	6.1336e-45
NCU02904	12.7553	0.502912	-3.53285	1.26245e-11	9.05741e-11
NCU05812	6.14294	0.117542	-3.50644	4.87084e-09	2.65784e-08
NCU09227	55.8209	4.84762	-3.50309	1.05855e-28	2.5741e-27
NCU07351	39.7608	3.35032	-3.48342	7.71632e-42	2.92783e-40
NCU07421	68.1201	5.72201	-3.47817	1.53578e-41	5.79737e-40
NCU05050	3.84173	0.365764	-3.47638	2.57705e-06	9.97353e-06
NCU11295	3.34312	0.282081	-3.47363	2.01919e-07	9.16919e-07
NCU01195	430.723	37.0646	-3.47147	1.27242e-71	1.23241e-69
NCU04905	31.2754	2.47851	-3.45589	6.98237e-26	1.44781e-24
NCU00285	25.7572	2.33715	-3.43954	1.25328e-45	5.42671e-44
NCU04942	22.6513	1.9059	-3.4265	9.6272e-29	2.3622e-27
NCU14176	95.247	8.21951	-3.40558	7.59083e-09	4.04606e-08
NCU08998	44.9205	3.37239	-3.40454	2.61279e-48	1.21726e-46
NCU09663	30.2337	2.61129	-3.4	1.21844e-24	2.35405e-23
NCU07267	92.2537	4.2036	-3.37502	1.61919e-36	5.25061e-35
NCU00414	224.76	20.5013	-3.37326	3.83728e-104	8.07035e-102
NCU04818	5.00363	0.401641	-3.363	4.56035e-08	2.21284e-07
NCU02124	88.0058	7.86923	-3.35367	4.53488e-36	1.43267e-34
NCU04049	34.4206	3.26544	-3.34417	1.44804e-44	6.02206e-43
NCU02096	50.7478	4.34851	-3.337	7.8758e-48	3.62336e-46
NCU04823	41.4549	3.93568	-3.33586	1.73741e-21	2.72688e-20
NCU03208	18.9854	1.79688	-3.32033	1.62112e-16	1.78638e-15
NCU11337	637.414	61.1176	-3.31606	1.88446e-54	1.08371e-52
NCU02227	27.8208	2.39792	-3.30672	5.06676e-28	1.17654e-26
NCU04443	53.6889	5.04447	-3.29471	1.36942e-47	6.26104e-46
NCU02882	20.0274	1.96057	-3.28516	6.48472e-22	1.05373e-20
NCU09912	12.7416	1.31829	-3.28458	4.80385e-25	9.4802e-24
NCU03084	83.6419	3.87461	-3.27977	3.78605e-61	2.5568e-59
NCU07205	49.6972	5.03202	-3.26955	9.36247e-39	3.25081e-37
NCU02596	50.2985	4.97539	-3.25087	1.73503e-22	2.89604e-21
NCU10895	5.69666	0.567789	-3.2349	6.29141e-16	6.70203e-15
NCU06083	12.6452	1.27356	-3.2186	2.00812e-17	2.37649e-16
NCU07503	105.558	10.3169	-3.2117	1.74781e-66	1.4138e-64
NCU07355	2.33485	0.220799	-3.18222	3.26869e-05	0.000106447
NCU05279	29.4478	3.11674	-3.18156	8.42713e-22	1.36035e-20
NCU09823	3.69638	0.392898	-3.17287	4.14701e-09	2.28318e-08
NCU02475	89.8658	9.13413	-3.16338	6.57648e-62	4.69995e-60
NCU12022	9.95933	0.964954	-3.16224	3.26655e-08	1.61052e-07
NCU03949	32.5889	3.38481	-3.14063	6.26438e-36	1.9539e-34
NCU00408	7.08684	0.580413	-3.13793	1.11404e-05	3.90498e-05
NCU07884	6.83744	0.740399	-3.12471	2.43141e-11	1.69646e-10
NCU05832	168.634	17.3475	-3.09997	2.30485e-66	1.84413e-64
NCU02513	75.8635	7.54807	-3.09769	1.05543e-39	3.84606e-38
NCU08407	4.32582	0.441777	-3.09476	3.20422e-06	1.22335e-05
NCU04545	23.6805	2.4746	-3.09444	9.55845e-36	2.91949e-34
NCU01403	5.53074	0.479141	-3.08248	1.57092e-09	9.11953e-09
NCU06836	86.2203	9.83398	-3.08207	1.56746e-61	1.0885e-59
NCU00293	18.7505	2.05071	-3.05573	1.09358e-19	1.53038e-18
NCU01678	12.35	0.982039	-3.05264	3.29308e-16	3.58585e-15
NCU11307	22.118	2.64452	-3.04933	1.36786e-17	1.64792e-16
NCU01652	77.2976	8.68263	-3.04877	8.33105e-59	5.37938e-57
NCU10226	19.9448	2.31495	-3.04239	8.30361e-09	4.39417e-08
NCU01347	21.8324	2.48858	-3.03559	1.68446e-23	3.01687e-22
NCU05390	335.018	38.436	-3.03312	5.76295e-104	1.17836e-101
NCU05858	3.65574	0.448847	-3.02187	1.73854e-09	1.00451e-08
NCU00260	10.5343	1.22261	-3.02033	4.92757e-12	3.68991e-11
NCU03651	63.3547	7.1693	-2.98919	4.16673e-54	2.37762e-52
NCU06185	429.811	50.8791	-2.98635	5.33739e-57	3.30156e-55
NCU15830	2.94313	0.45435	-2.98095	0.000113612	0.000335592
NCU01413	8.9404	0.370615	-2.97466	5.60175e-27	1.21278e-25
NCU10521	6.75792	0.77546	-2.95934	1.32464e-07	6.11326e-07
NCU01419	17.2967	2.12333	-2.95892	6.25598e-23	1.07343e-21
NCU05498	282.509	32.4767	-2.95823	3.86209e-05	0.000123873
NCU07318	523.096	64.494	-2.9543	1.12285e-45	4.8907e-44
NCU00143	0.337838	0.00411733	-2.95263	0.00149156	0.00359274
NCU05303	21.3954	2.45501	-2.94828	3.48022e-23	6.05624e-22
NCU05629	4.15304	0.309854	-2.91203	4.29396e-05	0.000136653
NCU06940	1386.91	156.98	-2.91169	2.04979e-37	6.88972e-36
NCU03392	3.34291	0.429283	-2.88856	7.88174e-05	0.000240537
NCU09648	2.22379	0.270215	-2.87405	3.46323e-05	0.000112254
NCU09295	15.9507	2.04061	-2.86518	1.46649e-16	1.62085e-15
NCU09410	5.77753	0.433778	-2.86397	5.03864e-11	3.41523e-10
NCU16378	6.93324	0.683869	-2.86195	0.000167421	0.000480838
NCU02193	3315.47	420.922	-2.86073	4.70575e-59	3.0654e-57
NCU10567	6.65343	0.721544	-2.83201	6.16045e-08	2.94844e-07
NCU02944	2.74407	0.278309	-2.82497	3.39668e-05	0.000110291
NCU07699	7.7832	1.04564	-2.81916	2.31215e-14	2.15578e-13
NCU09694	10.4227	1.27141	-2.81041	1.01786e-08	5.35559e-08
NCU06231	20.9146	2.80563	-2.80391	2.37498e-21	3.67274e-20
NCU06499	3.23553	0.392715	-2.79338	9.52533e-09	5.02263e-08
NCU03006	84.8182	11.3657	-2.79087	1.42014e-37	4.79527e-36
NCU01679	2.90445	0.390465	-2.77963	2.91916e-06	1.1215e-05
NCU16489	3.31138	0.931818	-2.77709	1.00762e-19	1.41548e-18
NCU08516	4.71737	0.504733	-2.77378	1.84541e-06	7.27589e-06
NCU05338	257.846	35.3413	-2.771	1.5949e-20	2.32938e-19
NCU04385	94.8135	13.2261	-2.76794	9.91041e-29	2.42361e-27
NCU04720	191.79	26.2522	-2.76536	1.10765e-76	1.14837e-74
NCU01633	259.218	37.5792	-2.75775	3.57945e-20	5.14616e-19
NCU05298	15.231	2.11892	-2.75733	1.24978e-24	2.40828e-23
NCU02252	512.125	71.0126	-2.75651	2.73496e-67	2.28774e-65
NCU01781	10.6185	1.42569	-2.74852	6.00417e-15	5.93244e-14
NCU05134	139.006	21.3678	-2.74145	5.33832e-05	0.00016693
NCU00448	3.96676	0.567335	-2.73839	4.70365e-09	2.57424e-08
NCU03603	14.2543	1.88479	-2.73811	4.19185e-13	3.47871e-12
NCU02988	21.9983	3.07309	-2.73711	7.3717e-42	2.81156e-40
NCU07320	34.3505	4.98767	-2.73308	8.93251e-30	2.25179e-28
NCU00635	549.38	79.7103	-2.72867	2.31437e-48	1.0851e-46
NCU04621	13.9377	2.0382	-2.72473	3.23939e-23	5.65051e-22
NCU08985	45.1747	3.93559	-2.71513	4.53009e-27	9.92441e-26
NCU04908	4.53559	0.671209	-2.70206	6.12994e-05	0.000189989
NCU16857	5.12573	0.665374	-2.69974	2.45163e-07	1.10376e-06
NCU07959	75.2724	10.3646	-2.69473	4.2411e-50	2.08125e-48
NCU05653	14.5068	2.09684	-2.68638	1.36628e-17	1.64792e-16
NCU07255	8.8263	1.17859	-2.68109	4.55411e-13	3.77085e-12
NCU09222	61.7049	9.39319	-2.67732	2.67364e-26	5.63917e-25
NCU06607	4.07892	0.604201	-2.67698	5.38444e-07	2.30838e-06
NCU02296	30.4832	4.57278	-2.66948	1.23707e-27	2.80188e-26
NCU09098	8.151	1.25428	-2.66557	1.49278e-09	8.70022e-09
NCU07350	0.133568	0.056654	-2.66426	0.000464456	0.00123469
NCU01808	677.883	99.6364	-2.66414	4.43972e-49	2.136e-47
NCU00865	73.295	10.4342	-2.65943	5.58377e-25	1.09606e-23
NCU02798	305.65	43.9622	-2.65636	2.97307e-24	5.61148e-23
NCU03368	77.0539	10.7739	-2.65515	1.63576e-21	2.5781e-20
NCU05255	8.26474	1.44351	-2.65441	1.9061e-11	1.34782e-10
NCU05755	56.4368	8.44796	-2.652	9.76741e-24	1.77965e-22
NCU09895	55.5016	8.47936	-2.64933	2.72907e-36	8.77234e-35
NCU06207	133.297	20.1751	-2.63882	4.86516e-33	1.37212e-31
NCU09429	1.86415	0.26903	-2.63722	0.000544057	0.00142927
NCU04202	489.818	73.1938	-2.63557	2.21971e-92	3.40401e-90
NCU09497	47.2766	7.45192	-2.62505	3.36243e-05	0.000109324
NCU06245	14.0701	3.47819	-2.61711	4.8309e-21	7.28694e-20
NCU12104	2.91253	0.423673	-2.60835	0.00055233	0.00144996
NCU07121	30.6926	4.65586	-2.60632	8.15558e-27	1.75024e-25
NCU09992	10.8761	1.70027	-2.60553	6.04078e-14	5.42932e-13
NCU09427	9.80972	1.48985	-2.60355	2.80795e-15	2.8431e-14
NCU09670	7.69628	0.904571	-2.59065	6.98428e-09	3.74173e-08
NCU05130	6.50608	0.912147	-2.58672	1.52909e-10	9.82169e-10
NCU02122	21.205	3.36651	-2.57789	4.97872e-25	9.79903e-24
NCU05786	165.196	26.1869	-2.57465	1.52058e-44	6.28818e-43
NCU01873	7.8054	1.12521	-2.57379	3.16248e-14	2.91717e-13
NCU14055	0.189969	0.00966633	-2.57133	0.000816518	0.00207326
NCU11172	17.7467	2.70764	-2.57038	4.40272e-16	4.76594e-15
NCU08065	4.78314	0.821339	-2.56833	5.69511e-09	3.07795e-08
NCU09954	1.21477	0.229484	-2.56814	0.00167236	0.00399035
NCU07159	2.63339	0.427825	-2.56492	7.77589e-05	0.000237898
NCU08726	15.929	2.48308	-2.56378	3.41438e-25	6.81119e-24
NCU05558	9.13178	1.25688	-2.55896	7.97365e-12	5.8694e-11
NCU05814	22.3552	3.44267	-2.53789	2.73038e-18	3.47122e-17
NCU03328	4.26498	0.710196	-2.53627	0.000107368	0.000318683
NCU04598	7.45664	1.25827	-2.53551	5.3587e-17	6.17299e-16
NCU11279	2.8144	0.377195	-2.53148	0.00196838	0.00462619
NCU09505	10.8521	1.75764	-2.53124	5.06381e-11	3.42913e-10
NCU07298	5.39897	0.802283	-2.5271	1.27235e-06	5.1432e-06
NCU00749	17.4138	2.59971	-2.52439	4.60188e-19	6.13668e-18
NCU06941	189.72	61.5764	-2.52417	2.24881e-31	5.95449e-30
NCU05081	4.41791	0.700526	-2.52127	8.7689e-05	0.000265084
NCU03735	42.868	7.04885	-2.51938	1.05957e-28	2.5741e-27
NCU06934	10.6712	1.2035	-2.51874	5.49772e-16	5.87354e-15
NCU09244	4.4226	0.736028	-2.51822	1.95303e-12	1.53592e-11
NCU00305	3.61632	0.504867	-2.51471	0.000104057	0.000309606
NCU01897	22.1414	3.78612	-2.51361	3.09675e-22	5.11102e-21
NCU05826	16.2052	2.75702	-2.51183	2.82427e-18	3.58439e-17
NCU01417	1.61951	0.226447	-2.50348	0.000436977	0.00116712
NCU09852	1.97763	0.213599	-2.49511	0.00321737	0.00722264
NCU09003	19.3842	3.13273	-2.49388	8.57137e-25	1.67358e-23
NCU00114	97.0052	16.2741	-2.49193	6.12156e-44	2.44896e-42
NCU08996	4.58769	0.681296	-2.48636	0.000497245	0.00131285
NCU03074	14.3855	2.28749	-2.48434	1.70432e-17	2.02347e-16
NCU05652	19.3982	3.1878	-2.48192	4.61969e-07	1.9932e-06
NCU09858	7.72096	1.29086	-2.47186	7.4144e-12	5.47966e-11
NCU04436	4.87946	0.760941	-2.46973	1.66288e-06	6.60218e-06
NCU02632	28.3929	4.83937	-2.46782	1.67785e-36	5.41697e-35
NCU03255	46.2767	7.93921	-2.46586	1.98503e-32	5.47259e-31
NCU06583	2.23748	0.371156	-2.46563	3.35848e-07	1.47593e-06
NCU09428	6.2776	1.0161	-2.45875	5.07687e-08	2.45055e-07
NCU10610	9.4452	1.44248	-2.45459	4.50386e-11	3.07541e-10
NCU07914	953.993	150.27	-2.44772	1.09288e-59	7.18275e-58
NCU01881	21.2994	3.66952	-2.43644	4.61549e-24	8.57944e-23
NCU03873	53.6468	9.07118	-2.4321	7.70403e-24	1.4142e-22
NCU03696	23.8457	4.2372	-2.42948	3.20211e-11	2.21114e-10
NCU16003	8.15976	1.36983	-2.42924	3.48026e-06	1.32121e-05
NCU04736	48.8761	8.63141	-2.42397	1.18411e-49	5.77235e-48
NCU04940	3.80647	0.758281	-2.42023	0.000144941	0.000422036
NCU08739	4.79285	0.875362	-2.41816	5.37489e-06	1.98319e-05
NCU06687	149.121	25.7504	-2.41529	2.04422e-70	1.85772e-68
NCU14119	3.69763	0.657939	-2.41519	0.00110923	0.00272986
NCU16396	66.9652	11.9626	-2.40798	1.96391e-35	5.92473e-34
NCU07910	15.1795	2.8305	-2.40637	3.01017e-15	3.04366e-14
NCU09791	6.21222	1.06537	-2.40488	3.83544e-13	3.20098e-12
NCU00499	168.921	28.1742	-2.40337	3.31822e-45	1.42008e-43
NCU09782	18.3372	3.33246	-2.40223	3.7837e-11	2.60298e-10
NCU02665	26.8177	4.79215	-2.39884	9.55052e-23	1.62359e-21
NCU08601	6.24593	0.998028	-2.39803	1.15616e-09	6.80296e-09
NCU03329	21.8349	3.92711	-2.39537	1.61951e-15	1.66033e-14
NCU05418	18.5558	3.51391	-2.39229	8.22256e-13	6.6806e-12
NCU02278	25.564	3.9215	-2.38875	2.18843e-23	3.85384e-22
NCU03494	2.44334	0.464505	-2.37877	1.11702e-05	3.91355e-05
NCU03755	47.6366	8.66311	-2.36791	4.1195e-28	9.62655e-27
NCU06960	3.51064	0.75347	-2.36556	5.70661e-05	0.000177467
NCU11306	2.5498	0.421059	-2.36431	0.000101839	0.00030325
NCU04983	61.0181	11.283	-2.36249	1.19145e-24	2.30797e-23
NCU12021	11.5982	2.2653	-2.36148	2.55486e-07	1.14742e-06
NCU09020	45.0914	7.98058	-2.36016	1.07737e-20	1.59248e-19
NCU08495	12.2822	2.29899	-2.35717	2.94572e-07	1.30466e-06
NCU08721	3.00001	0.56132	-2.35513	2.81705e-07	1.25447e-06
NCU01420	54.5869	9.24187	-2.35425	1.73165e-34	5.11916e-33
NCU00719	2.08037	0.344902	-2.3526	0.00159812	0.00383059
NCU01768	161.629	30.012	-2.34097	1.47509e-54	8.6176e-53
NCU08788	5.02225	0.942452	-2.3403	1.03162e-06	4.23522e-06
NCU14029	3.52034	0.62482	-2.33662	3.89731e-06	1.46968e-05
NCU09651	2.7444	0.516768	-2.33346	0.000252148	0.000702789
NCU10052	2.9765	0.549667	-2.32996	4.08585e-06	1.53527e-05
NCU08648	8.2637	1.50321	-2.32891	1.26966e-08	6.59095e-08
NCU03231	12.2726	2.15766	-2.32815	1.80948e-10	1.15222e-09
NCU04737	10.8693	2.04082	-2.32224	1.46462e-18	1.88811e-17
NCU01107	64.8368	12.5524	-2.32208	2.27535e-21	3.54098e-20
NCU09695	4.34823	0.905318	-2.31966	0.0013952	0.00337832
NCU04444	4.6299	0.912919	-2.31678	1.07816e-15	1.13215e-14
NCU10467	19.0639	3.619	-2.31391	1.77186e-13	1.53986e-12
NCU16525	8.41073	1.63865	-2.31346	6.04209e-07	2.56789e-06
NCU06546	15.4142	3.00089	-2.30648	1.56448e-17	1.86951e-16
NCU08455	12.021	2.59098	-2.30337	8.21889e-09	4.35246e-08
NCU01299	12.9142	2.68862	-2.29918	1.10319e-06	4.50641e-06
NCU03626	3.55256	0.694844	-2.29532	0.000436449	0.00116649
NCU00774	49.7878	9.11248	-2.29302	2.08015e-12	1.62862e-11
NCU04430	12.7696	2.37747	-2.28963	2.28493e-17	2.6911e-16
NCU01752	184.915	36.8393	-2.28782	1.53156e-05	5.25299e-05
NCU06762	18.194	3.49742	-2.28746	9.31867e-22	1.4977e-20
NCU01555	102.265	19.6122	-2.28172	6.15024e-30	1.5611e-28
NCU04932	12.8514	2.48482	-2.2751	5.32115e-15	5.30027e-14
NCU00720	31.3168	5.90953	-2.26933	7.93169e-18	9.69853e-17
NCU01801	28.2798	6.08119	-2.26498	5.13226e-11	3.46592e-10
NCU03530	509.562	101.859	-2.26491	1.55194e-20	2.28021e-19
NCU07690	88.3429	17.5111	-2.26213	2.00007e-49	9.68586e-48
NCU00936	28.6205	4.61543	-2.2587	1.30954e-23	2.36262e-22
NCU01759	76.7942	15.1748	-2.25854	3.49139e-33	9.96129e-32
NCU04923	356.384	70.7002	-2.25374	4.28986e-22	7.01726e-21
NCU02344	6.11068	1.10091	-2.24661	2.28647e-06	8.92401e-06
NCU02651	9.23487	1.88451	-2.23938	2.11483e-10	1.33739e-09
NCU09307	14.0766	2.84543	-2.23818	3.77417e-18	4.71675e-17
NCU05859	1.506	0.270426	-2.2298	0.0035992	0.00798485
NCU00864	26.0607	5.3244	-2.22897	1.90441e-13	1.6415e-12
NCU16802	25.1526	4.83229	-2.22728	5.22357e-16	5.61324e-15
NCU09994	6.36074	1.29365	-2.22712	5.56687e-07	2.37828e-06
NCU05833	7.94849	1.62178	-2.22138	9.53106e-19	1.24174e-17
NCU09097	24.3399	4.89013	-2.21957	2.57296e-20	3.72094e-19
NCU04291	12.4737	2.4493	-2.21742	6.16571e-15	6.07574e-14
NCU16460	246.352	49.4844	-2.21211	3.40476e-37	1.13405e-35
NCU05429	176.553	36.3773	-2.20796	5.18383e-60	3.46892e-58
NCU06559	10.0892	1.87932	-2.20412	7.0192e-08	3.33559e-07
NCU06125	47.07	9.61458	-2.20313	2.04131e-20	2.97547e-19
NCU00809	2.42869	0.437609	-2.20191	0.00011282	0.000333387
NCU07550	682.016	139.334	-2.19989	1.34609e-69	1.16571e-67
NCU11368	6.28828	1.25136	-2.18794	5.85843e-05	0.000181804
NCU01063	26.8563	5.38247	-2.18152	6.27069e-15	6.16269e-14
NCU10987	16.6041	3.41389	-2.18046	1.27363e-19	1.76557e-18
NCU01327	20.9895	4.45898	-2.18015	3.82267e-19	5.11613e-18
NCU08178	1.71565	0.381821	-2.16886	0.0016437	0.00392578
NCU05132	24.0387	5.20281	-2.16313	3.0863e-14	2.85405e-13
NCU04933	0.266267	0.241701	-2.16057	0.00466542	0.0101059
NCU16971	4.02424	0.724672	-2.15751	1.2986e-07	6.00062e-07
NCU08064	5.24471	1.08593	-2.15593	1.04649e-11	7.61183e-11
NCU00931	12.3913	2.64179	-2.15493	4.28822e-10	2.63266e-09
NCU00412	5.10864	0.671951	-2.15359	2.23015e-08	1.12285e-07
NCU00941	1.75528	0.394903	-2.14561	2.16384e-05	7.24659e-05
NCU06486	1.11728	0.344466	-2.14421	0.00645616	0.0135481
NCU04195	27.6117	5.93792	-2.14177	3.08829e-16	3.36784e-15
NCU11180	6.42335	1.42603	-2.13722	3.40802e-12	2.59963e-11
NCU06881	30.5816	6.15721	-2.13519	3.9922e-24	7.45852e-23
NCU00602	13.6225	2.81527	-2.13201	6.43821e-15	6.30208e-14
NCU06001	72.3976	14.2426	-2.13049	1.31105e-21	2.07096e-20
NCU08954	70.6192	14.5999	-2.12766	4.67963e-25	9.28484e-24
NCU00263	20.0264	4.3271	-2.12382	8.71431e-22	1.40363e-20
NCU07760	1.88404	0.411565	-2.11876	0.00544301	0.0116471
NCU04264	19.9895	4.50301	-2.11771	1.02157e-26	2.18598e-25
NCU16673	1034.16	219.274	-2.11766	4.67568e-14	4.23863e-13
NCU04140	763.525	164.948	-2.11522	2.34674e-43	9.04417e-42
NCU01569	9.53306	1.92148	-2.10974	4.21551e-17	4.88667e-16
NCU03747	15.5552	3.46861	-2.10964	1.17441e-13	1.03283e-12
NCU01745	38.2511	8.36607	-2.1074	9.39358e-33	2.61917e-31
NCU01348	33.4142	7.21704	-2.10261	0.000703936	0.00180988
NCU05878	34.7823	7.78269	-2.10167	9.69304e-20	1.36425e-18
NCU08148	38.7269	9.03031	-2.09118	1.15534e-34	3.42922e-33
NCU05006	37.9475	8.31543	-2.09024	1.44554e-25	2.94754e-24
NCU07804	5.43476	1.14443	-2.08591	8.12224e-08	3.8424e-07
NCU07923	2.79644	0.564463	-2.08027	0.000780213	0.00198931
NCU09371	106.699	22.5766	-2.07751	2.60342e-33	7.45673e-32
NCU01140	4.74844	1.10905	-2.07427	4.25033e-11	2.91039e-10
NCU01145	62.5169	12.243	-2.07344	1.20838e-32	3.35657e-31
NCU04193	49.7013	10.7383	-2.06601	2.02522e-21	3.1651e-20
NCU07737	4.63517	0.844214	-2.06557	7.13191e-05	0.00021929
NCU02246	1.67257	0.361386	-2.06238	0.000346281	0.000939542
NCU08612	6.80998	1.83421	-2.06181	2.72582e-10	1.70329e-09
NCU06508	11.5126	2.62151	-2.05951	6.08952e-19	8.07657e-18
NCU07858	9.8062	2.00048	-2.05365	1.03159e-06	4.23522e-06
NCU04866	6.74869	1.5011	-2.05015	1.90011e-08	9.63935e-08
NCU02372	19.2149	4.3606	-2.04239	6.54947e-11	4.3788e-10
NCU00397	31.8779	7.16094	-2.04138	8.66447e-14	7.6935e-13
NCU00567	53.6938	12.2285	-2.04025	3.5345e-19	4.74771e-18
NCU09810	33.629	7.83385	-2.03742	6.5325e-18	8.06808e-17
NCU06081	35.2673	7.87576	-2.03702	4.91428e-12	3.68371e-11
NCU11146	2.31108	0.583259	-2.03162	0.00133159	0.00323172
NCU03886	51.0572	11.7779	-2.02706	4.71874e-33	1.3411e-31
NCU03500	74.4103	17.3524	-2.027	2.52122e-18	3.22761e-17
NCU01080	36.4847	8.39013	-2.02584	2.33527e-21	3.62656e-20
NCU05844	10.9328	2.61036	-2.02381	1.84312e-05	6.2464e-05
NCU04826	40.6366	9.52682	-2.01885	5.47635e-19	7.27643e-18
NCU16006	5.6713	1.30007	-2.01004	9.22532e-05	0.0002774
NCU08638	5.41194	1.00335	-1.99621	0.000532101	0.00139935
NCU05683	13.5376	3.06534	-1.99609	1.78609e-15	1.82603e-14
NCU04314	66.0649	15.6652	-1.99073	7.30548e-10	4.39703e-09
NCU05342	28.624	6.69698	-1.98776	9.75017e-18	1.18239e-16
NCU11352	10.2069	2.43745	-1.98703	1.26696e-09	7.43707e-09
NCU01514	7.98033	1.96271	-1.98546	1.24063e-07	5.74718e-07
NCU04865	3.89113	0.963768	-1.97887	3.90826e-08	1.91027e-07
NCU04791	17.6587	4.48993	-1.97435	2.66893e-11	1.85515e-10
NCU04951	275.353	65.3622	-1.97304	1.69153e-25	3.43013e-24
NCU00054	3.60719	0.790595	-1.96778	6.30253e-05	0.00019501
NCU06206	42.567	10.4394	-1.96451	2.95076e-21	4.53455e-20
NCU09354	12.3699	1.49249	-1.96058	1.27845e-12	1.01847e-11
NCU00642	9.60798	2.35962	-1.95971	6.75253e-08	3.21718e-07
NCU08561	6.41137	1.43075	-1.95918	1.10595e-06	4.51521e-06
NCU01162	2.24475	0.54445	-1.95913	0.000708515	0.00182101
NCU02097	10.7424	2.03129	-1.95911	2.3356e-08	1.17194e-07
NCU08611	11.3266	2.59588	-1.95628	2.40307e-17	2.82121e-16
NCU03935	93.1453	22.4514	-1.95508	2.08756e-28	4.94101e-27
NCU04591	4.3138	1.05962	-1.95388	9.2721e-06	3.30678e-05
NCU06697	24.5675	2.7396	-1.953	7.06491e-23	1.20661e-21
NCU02035	4.48842	1.16676	-1.95009	0.000325982	0.000889401
NCU01196	2.45779	0.536526	-1.94696	0.000273268	0.000756812
NCU08935	25.5113	6.36426	-1.93552	9.22296e-13	7.42781e-12
NCU05495	4680.31	1143.6	-1.93473	2.67496e-46	1.19336e-44
NCU02678	4.04913	1.04556	-1.92958	8.40715e-08	3.96641e-07
NCU04801	29.3553	7.02169	-1.92852	4.22206e-21	6.40796e-20
NCU02633	19.1682	4.44298	-1.92685	1.89834e-14	1.78691e-13
NCU08786	29.7099	7.34831	-1.92573	1.12982e-11	8.1725e-11
NCU08535	51.4893	12.9394	-1.92536	1.29248e-20	1.90278e-19
NCU08420	10.7268	2.58371	-1.92169	2.23876e-19	3.04051e-18
NCU01549	17.84	4.33964	-1.91904	1.3463e-18	1.73862e-17
NCU09141	55.4335	13.0992	-1.91746	6.62117e-11	4.41872e-10
NCU04413	25.4945	6.42481	-1.9164	1.34058e-14	1.28156e-13
NCU09032	18.833	4.75378	-1.91398	4.53259e-08	2.20373e-07
NCU08791	17.3248	4.27913	-1.90387	1.05352e-10	6.89944e-10
NCU08165	2.83076	0.646195	-1.90049	0.00542787	0.0116227
NCU05490	301.826	75.1656	-1.8976	4.07038e-38	1.4001e-36
NCU07458	106.857	27.2477	-1.89619	7.39323e-32	2.00079e-30
NCU01059	2.46844	0.638026	-1.89269	0.00133541	0.00323992
NCU02677	48.252	12.3721	-1.89246	1.60612e-17	1.91615e-16
NCU16698	100.386	25.5968	-1.89076	4.73211e-26	9.86773e-25
NCU09580	2.24634	0.518194	-1.88918	0.000559921	0.0014678
NCU05723	40.9339	10.5199	-1.88794	6.17084e-36	1.93292e-34
NCU05593	41.5469	10.5655	-1.88601	9.41982e-19	1.22942e-17
NCU06984	7.40768	1.94226	-1.88516	2.16495e-14	2.02751e-13
NCU01496	21.3311	4.86614	-1.88008	5.23471e-09	2.85005e-08
NCU06382	20.423	5.05611	-1.87888	1.95578e-10	1.24001e-09
NCU04013	85.5977	22.5543	-1.87691	4.09001e-32	1.11506e-30
NCU00751	9.2837	2.56015	-1.87514	2.32473e-06	9.06373e-06
NCU03643	11.7871	3.08307	-1.87206	9.41118e-10	5.58225e-09
NCU01185	1.61575	0.278656	-1.86883	0.00207346	0.0048453
NCU04532	1.68372	1.38546	-1.86745	6.11817e-06	2.23948e-05
NCU05060	16.8391	4.09495	-1.86646	4.63195e-15	4.65154e-14
NCU11095	2.21445	0.302068	-1.86549	1.27627e-05	4.42723e-05
NCU09824	11.0376	2.80873	-1.86348	3.10951e-14	2.87191e-13
NCU06533	8.38484	2.10722	-1.85921	1.61689e-06	6.43347e-06
NCU05850	82.8197	21.8557	-1.85702	2.46259e-22	4.08269e-21
NCU01382	3.99504	1.03256	-1.85666	5.48645e-07	2.35024e-06
NCU05577	14.1721	3.78067	-1.85106	5.45658e-14	4.91627e-13
NCU03079	11.8172	3.04446	-1.84977	4.03642e-15	4.06458e-14
NCU00915	263.7	69.0785	-1.84681	1.251e-27	2.82473e-26
NCU03731	195.191	50.3956	-1.84034	7.74849e-44	3.08306e-42
NCU02009	97.3145	26.2819	-1.8377	4.05124e-20	5.81309e-19
NCU08226	10.9904	2.70957	-1.83222	2.85936e-08	1.41927e-07
NCU08443	2.56382	0.633542	-1.83204	2.04469e-05	6.87259e-05
NCU06847	8.43147	2.23118	-1.82929	1.3255e-09	7.76213e-09
NCU16441	4.8315	1.02071	-1.82598	0.000676912	0.00174405
NCU05836	36.6982	9.92353	-1.8256	6.49108e-12	4.80692e-11
NCU06751	9.67267	1.80719	-1.82274	5.003e-06	1.8562e-05
NCU00729	74.5106	19.4683	-1.82043	1.13641e-21	1.81063e-20
NCU04906	8.84554	2.17246	-1.82037	7.47309e-06	2.70716e-05
NCU05501	3.20887	0.944344	-1.82005	0.00308558	0.00694797
NCU10051	2458.24	639.258	-1.81981	8.03222e-17	9.06827e-16
NCU08900	12.7392	3.40482	-1.81656	1.91533e-09	1.1006e-08
NCU06232	87.3159	22.7307	-1.81435	6.68371e-28	1.53746e-26
NCU00798	124.308	31.071	-1.81281	1.20393e-28	2.90561e-27
NCU04071	12.2364	3.25098	-1.8101	2.41795e-07	1.08993e-06
NCU04304	505.798	135.396	-1.80891	4.38722e-39	1.54518e-37
NCU07533	4.66431	1.22032	-1.80821	4.73119e-06	1.76246e-05
NCU06042	83.0041	21.9287	-1.80657	7.48381e-17	8.47513e-16
NCU02623	247.933	65.9796	-1.8048	3.99637e-34	1.172e-32
NCU01739	52.57	14.2821	-1.80428	1.16065e-13	1.02196e-12
NCU06969	13.5942	3.65796	-1.80123	1.21788e-11	8.76326e-11
NCU03730	88.4638	24.0779	-1.79942	5.91603e-38	2.02548e-36
NCU06518	5.51622	1.458	-1.79933	1.00031e-05	3.54345e-05
NCU06758	8.10742	2.07599	-1.79873	2.23417e-11	1.56925e-10
NCU05185	2.39402	0.632981	-1.79841	9.64337e-05	0.000289262
NCU09262	9.69677	2.86099	-1.79678	1.01605e-06	4.17595e-06
NCU06194	23.0116	6.21122	-1.79469	2.3622e-19	3.20224e-18
NCU09495	6.7748	1.88547	-1.7923	8.25426e-05	0.000250762
NCU05395	475.752	127.625	-1.79141	1.29171e-33	3.74342e-32
NCU09498	14.4134	4.17435	-1.78896	2.89393e-07	1.28559e-06
NCU14172	5.92256	1.541	-1.78728	0.00131492	0.00319548
NCU09544	4.23653	0.996512	-1.787	4.8383e-05	0.000152265
NCU02361	2.42423	0.461089	-1.78615	0.00408785	0.00895556
NCU09213	2.102	0.59253	-1.78161	0.00549767	0.0117436
NCU16028	17.785	4.713	-1.77721	1.23748e-06	5.01603e-06
NCU04381	3.95673	1.08316	-1.77652	0.00701196	0.0145723
NCU09551	4.69993	1.1328	-1.77157	1.17029e-05	4.09045e-05
NCU02624	129.173	36.0272	-1.77022	8.6418e-20	1.21863e-18
NCU04996	23.0506	5.3395	-1.76716	1.56975e-08	8.04102e-08
NCU07308	89.5148	25.0319	-1.76531	9.70439e-25	1.88979e-23
NCU05149	2.06189	0.472003	-1.76504	0.00344205	0.0076906
NCU09090	25.9924	7.1472	-1.76455	6.15931e-18	7.63278e-17
NCU01005	8.46215	1.67554	-1.76022	5.13598e-07	2.207e-06
NCU09201	20.1158	5.6037	-1.76016	3.20245e-13	2.68794e-12
NCU08168	13.2627	3.52172	-1.7555	8.11155e-06	2.92692e-05
NCU03192	53.9543	14.5056	-1.75273	6.09021e-17	6.98288e-16
NCU02954	79.6245	22.4615	-1.75254	1.70213e-23	3.04112e-22
NCU14160	5.19954	1.079	-1.74609	0.00126671	0.00308955
NCU04643	14.9618	4.36166	-1.74606	3.69065e-12	2.8036e-11
NCU09800	6.29081	1.68841	-1.74315	5.24893e-06	1.93865e-05
NCU09102	2.60337	0.68951	-1.74083	0.00114354	0.00280774
NCU10314	9.55014	2.49396	-1.74015	1.27676e-07	5.90339e-07
NCU08882	60.5291	17.2644	-1.73901	1.89155e-22	3.15016e-21
NCU02799	1.58781	0.501728	-1.73731	0.00561531	0.0119671
NCU07222	11.7526	3.57569	-1.73306	5.48847e-07	2.35024e-06
NCU10069	183.112	51.4224	-1.73157	4.7724e-24	8.84878e-23
NCU08982	8.97771	2.35467	-1.73015	2.63818e-07	1.18124e-06
NCU02064	85.3296	24.4568	-1.72883	2.17718e-15	2.2197e-14
NCU01378	17.2865	4.79662	-1.72818	1.25824e-16	1.39276e-15
NCU04187	34.0021	9.72247	-1.72361	2.13496e-07	9.65917e-07
NCU02303	4.98635	1.23391	-1.72002	0.00560402	0.0119499
NCU08292	13.6699	3.87769	-1.71366	4.69277e-12	3.53567e-11
NCU02049	7.91638	2.25469	-1.71354	1.73715e-11	1.23191e-10
NCU04156	169.516	49.0124	-1.71348	1.71314e-27	3.82135e-26
NCU09157	6.52622	1.90215	-1.71184	3.79176e-10	2.33762e-09
NCU05667	473.363	137.74	-1.71129	3.33911e-13	2.79945e-12
NCU05513	34.3444	9.79016	-1.70884	3.17981e-19	4.27908e-18
NCU03070	20.5168	5.52097	-1.70677	9.12607e-19	1.1932e-17
NCU04570	7.07832	2.03037	-1.7033	1.72246e-09	9.97563e-09
NCU09331	158.772	46.4491	-1.7024	9.63657e-28	2.20294e-26
NCU05594	34.8485	9.88322	-1.69969	7.72546e-18	9.47785e-17
NCU06608	1.22642	0.372956	-1.69748	0.0176471	0.0334326
NCU04579	111.63	32.4955	-1.69696	1.69129e-22	2.82945e-21
NCU06656	21.0671	5.93642	-1.6923	3.2016e-13	2.68794e-12
NCU08186	9.32564	3.02906	-1.69099	0.00124428	0.00303987
NCU09245	4.55883	1.25017	-1.69029	1.97471e-05	6.65257e-05
NCU04453	1.12857	0.339135	-1.68957	0.0064576	0.0135481
NCU01697	6.09445	1.67613	-1.68881	0.000434587	0.00116228
NCU00799	55.0607	17.0565	-1.68863	6.25739e-29	1.54049e-27
NCU06799	8.49669	2.41614	-1.68817	5.99488e-12	4.46643e-11
NCU06031	178.563	51.208	-1.68794	3.13412e-24	5.88527e-23
NCU00843	38.0194	11.0789	-1.68418	9.57818e-17	1.06988e-15
NCU03112	126.206	36.5218	-1.68298	2.0704e-24	3.94824e-23
NCU06737	95.807	28.2549	-1.68294	8.86554e-24	1.61934e-22
NCU00332	18.288	5.3202	-1.68059	6.63736e-13	5.42862e-12
NCU06240	45.6948	13.5016	-1.68009	4.31283e-13	3.57508e-12
NCU16549	5.11479	1.48469	-1.67989	4.13285e-06	1.55214e-05
NCU04699	37.2346	11.2879	-1.67751	1.38163e-11	9.8932e-11
NCU06930	3.5149	1.0344	-1.67208	2.68747e-09	1.51126e-08
NCU03188	39.7185	12.1349	-1.66653	1.9588e-19	2.68007e-18
NCU03514	1.02776	0.295457	-1.66552	0.00684157	0.0142746
NCU07072	22.0946	6.37738	-1.66474	1.89245e-12	1.48988e-11
NCU08727	10.3084	3.28755	-1.66451	5.17394e-06	1.91384e-05
NCU03736	19.5978	5.92665	-1.66377	2.05087e-08	1.03542e-07
NCU09886	80.6731	23.2103	-1.6634	4.14866e-14	3.77949e-13
NCU01281	4.57342	1.10997	-1.6598	0.00424777	0.00927004
NCU01649	11.3884	2.74837	-1.65784	5.71677e-07	2.43525e-06
NCU01068	50.5537	15.1635	-1.65539	2.40957e-11	1.68761e-10
NCU09770	38.1392	11.4525	-1.65526	1.123e-12	9.00478e-12
NCU06009	9.77753	2.71321	-1.65484	4.489e-05	0.000142368
NCU06772	3.91251	1.10906	-1.65434	7.32538e-05	0.000224957
NCU00399	52.2011	16.5162	-1.65242	0.0139402	0.0270678
NCU05079	8.71206	2.58207	-1.65223	3.2888e-08	1.62041e-07
NCU09294	12.3529	4.17432	-1.64982	8.42345e-09	4.45438e-08
NCU11215	4.98201	1.61664	-1.64847	1.87532e-06	7.38984e-06
NCU01102	45.2895	13.9488	-1.64752	1.32945e-18	1.71987e-17
NCU09421	10.9196	3.18242	-1.64745	2.74016e-05	9.02879e-05
NCU10129	20.0219	5.95768	-1.64671	2.15131e-10	1.35929e-09
NCU08270	7.12303	2.08999	-1.64555	3.17466e-10	1.97038e-09
NCU06034	26.8516	7.72222	-1.64507	9.72525e-11	6.38604e-10
NCU03235	4.50682	1.37768	-1.64263	1.99587e-06	7.84389e-06
NCU08011	5.27423	1.30432	-1.6425	3.55872e-05	0.000114994
NCU03779	19.504	5.66794	-1.64216	5.62485e-15	5.58013e-14
NCU00655	46.1867	13.6808	-1.64133	7.28219e-17	8.27225e-16
NCU08626	8.09374	2.46324	-1.64054	2.69882e-06	1.04229e-05
NCU02174	5.47774	1.60007	-1.63873	0.000978022	0.00243464
NCU04856	749.281	230.489	-1.63834	7.74457e-49	3.70181e-47
NCU05846	3.83626	1.17672	-1.63817	2.80345e-05	9.21671e-05
NCU03489	2.18875	0.736035	-1.63475	0.00103276	0.00255879
NCU06981	40.6532	12.7457	-1.63236	1.00788e-11	7.33828e-11
NCU07112	79.6292	24.1677	-1.63231	5.90704e-27	1.27512e-25
NCU08090	32.1203	10.0655	-1.62751	6.79186e-11	4.52033e-10
NCU07309	2.30101	0.544604	-1.62416	0.00259108	0.00592695
NCU05861	3.52825	1.10003	-1.62284	3.50333e-06	1.32791e-05
NCU00164	11.7616	3.57677	-1.62283	2.92052e-11	2.01859e-10
NCU10788	5.71231	1.77639	-1.62069	1.30825e-05	4.52539e-05
NCU10101	4.77171	1.47882	-1.61892	0.0011287	0.00277408
NCU11424	8.46027	2.50681	-1.61209	2.33256e-05	7.7939e-05
NCU04924	125.31	39.4801	-1.61144	0.00176029	0.00418388
NCU07545	3.8368	1.08298	-1.61113	0.00256848	0.00588622
NCU04672	4.3284	1.43747	-1.61086	0.000339863	0.000924172
NCU09400	18.0726	5.552	-1.6105	1.73442e-06	6.86034e-06
NCU02209	335.675	103.369	-1.60849	9.56681e-30	2.39528e-28
NCU08147	31.0205	9.27764	-1.60799	2.34366e-23	4.11734e-22
NCU02480	112.633	34.411	-1.60797	2.34592e-24	4.43916e-23
NCU07281	271.299	84.0273	-1.6067	1.69098e-26	3.59748e-25
NCU17105	7.56652	2.37335	-1.60331	1.94432e-07	8.83466e-07
NCU07349	1.7992	0.611409	-1.6029	0.0157297	0.0302235
NCU02690	8.22336	2.17634	-1.60277	4.19618e-08	2.04421e-07
NCU03922	98.839	29.652	-1.60231	1.53804e-19	2.1281e-18
NCU05835	27.5234	8.72197	-1.59818	4.78961e-10	2.92826e-09
NCU04237	15.2032	4.80182	-1.59666	9.38093e-07	3.8772e-06
NCU03293	609.246	191.044	-1.59586	1.14136e-10	7.45479e-10
NCU05127	3.4566	1.03173	-1.59485	0.00238168	0.00549579
NCU04609	16.3092	5.11102	-1.59335	6.33396e-12	4.70003e-11
NCU05340	0.512346	0.247169	-1.58977	5.67121e-06	2.08729e-05
NCU03908	29.8057	9.5437	-1.58536	4.53409e-12	3.42663e-11
NCU09595	6.9146	2.25291	-1.58365	4.52504e-06	1.69252e-05
NCU12121	2.41501	0.877446	-1.58291	0.00589418	0.0124604
NCU00838	24.9996	8.08282	-1.58077	4.66981e-12	3.52197e-11
NCU07572	15.4362	4.7428	-1.57924	4.00717e-13	3.34052e-12
NCU04731	57.4422	19.0057	-1.5776	1.08407e-28	2.62494e-27
NCU06850	3.25072	1.03129	-1.57686	0.000325989	0.000889401
NCU01250	17.0346	5.13895	-1.57212	1.11077e-09	6.54633e-09
NCU03057	9.71351	2.928	-1.56464	1.07083e-05	3.77329e-05
NCU02547	48.023	15.119	-1.56068	3.83723e-10	2.36169e-09
NCU03685	10.8621	3.50155	-1.56037	8.01219e-16	8.46165e-15
NCU01098	1.84984	0.54208	-1.5595	0.000527428	0.00138806
NCU07822	3.07781	0.898418	-1.5585	0.00446912	0.00971851
NCU00248	53.3147	16.3538	-1.55482	1.35416e-15	1.40791e-14
NCU03466	20.4962	6.51983	-1.55466	2.56225e-18	3.26876e-17
NCU05029	15.9228	4.98494	-1.55425	2.40617e-10	1.51383e-09
NCU00552	12.936	4.0884	-1.55176	6.26028e-09	3.37102e-08
NCU04452	231.781	75.9362	-1.55146	7.52755e-16	7.97271e-15
NCU02812	61.9312	19.0894	-1.54757	5.28513e-18	6.56051e-17
NCU06334	5.80713	1.81179	-1.54652	2.15504e-05	7.22043e-05
NCU02657	290.218	96.9899	-1.54185	4.01922e-37	1.33268e-35
NCU02204	20.6442	6.56442	-1.53738	3.79483e-13	3.17069e-12
NCU03596	27.5868	9.04974	-1.53488	4.81394e-13	3.97704e-12
NCU05575	13.5738	4.61504	-1.53441	3.33121e-08	1.63911e-07
NCU05789	222.808	74.7879	-1.53301	4.14902e-07	1.80716e-06
NCU09549	8.02754	2.55494	-1.52953	2.6488e-07	1.18528e-06
NCU05689	116.505	40.5055	-1.52351	1.63911e-21	2.5781e-20
NCU06091	35.8021	11.7222	-1.52289	7.46561e-20	1.05681e-18
NCU12151	17.9464	5.85125	-1.52184	6.53221e-08	3.11826e-07
NCU06740	287.186	90.2059	-1.52181	7.78011e-23	1.32568e-21
NCU06330	10.2371	3.35389	-1.51803	9.91655e-07	4.08253e-06
NCU09057	38.3277	12.4762	-1.51134	2.53675e-12	1.96765e-11
NCU00999	45.0356	14.4685	-1.50673	1.84582e-09	1.06482e-08
NCU16915	2.3903	0.844375	-1.50139	0.00572116	0.0121575
NCU04781	300.994	92.9948	-1.50078	1.29619e-28	3.11806e-27
NCU02969	10.4049	3.63777	-1.4999	6.02336e-06	2.20807e-05
NCU09360	2.0115	0.685253	-1.49987	0.0144236	0.0279252
NCU08070	22.2509	6.34674	-1.49954	1.08376e-13	9.56538e-13
NCU00106	49.9453	16.2457	-1.49897	1.44391e-15	1.49488e-14
NCU10497	74.7731	24.765	-1.49759	1.73932e-27	3.86802e-26
NCU08826	9.87521	3.25506	-1.4952	2.0225e-09	1.15767e-08
NCU00055	4.55963	1.29392	-1.49492	0.000941667	0.00235209
NCU11219	2.57976	0.827186	-1.49138	0.00105831	0.00261328
NCU07782	7.14121	2.41376	-1.48921	2.90983e-05	9.54088e-05
NCU03979	67.8954	22.9812	-1.48856	2.145e-13	1.83171e-12
NCU03032	1.27843	0.331199	-1.48698	0.0218464	0.0403238
NCU14023	1.71606	0.641088	-1.48686	0.0304406	0.0539286
NCU00289	22.1676	7.48785	-1.48318	2.80508e-13	2.37335e-12
NCU09263	219.355	72.2322	-1.47592	4.9493e-11	3.35777e-10
NCU04910	90.9776	29.8552	-1.47491	2.0944e-06	8.21797e-06
NCU07200	51.0261	16.4795	-1.47366	0.0504773	0.0841783
NCU00623	12.4778	4.41226	-1.4736	1.44409e-05	4.96959e-05
NCU01045	26.0528	8.47311	-1.47358	4.98467e-06	1.85034e-05
NCU02706	23.5167	7.65467	-1.46617	2.8738e-09	1.6099e-08
NCU00355	12.6742	4.3993	-1.46486	5.45085e-06	2.0092e-05
NCU00451	14.9547	5.1226	-1.46411	4.90576e-09	2.67491e-08
NCU06995	23.4467	7.73963	-1.46064	4.26216e-07	1.85205e-06
NCU08664	5.50932	1.77024	-1.46055	0.00283091	0.00642562
NCU09712	6.74177	2.28525	-1.45876	2.81456e-07	1.25412e-06
NCU16306	24.9375	9.10245	-1.45786	7.18877e-07	3.02726e-06
NCU01399	25.2626	7.23495	-1.45626	7.08864e-13	5.78486e-12
NCU05598	6.94991	2.33997	-1.45159	9.97683e-05	0.000297929
NCU03410	7.68416	2.44907	-1.4486	0.00197557	0.00464112
NCU11260	82.0661	27.6857	-1.44802	3.41638e-10	2.11328e-09
NCU09788	3.86356	0.986378	-1.44782	1.89001e-07	8.6038e-07
NCU10775	21.0644	7.21608	-1.44724	4.58519e-14	4.16173e-13
NCU07143	2.02857	0.712898	-1.44412	0.0240692	0.0438765
NCU08804	5.00133	1.8104	-1.44039	0.000189048	0.000537291
NCU07465	296.489	99.4212	-1.43932	1.37393e-09	8.03294e-09
NCU09337	3.33298	1.13177	-1.43892	0.000268942	0.000746205
NCU07915	41.5029	14.9928	-1.43845	2.49799e-11	1.73797e-10
NCU09534	85.0886	29.4788	-1.43753	8.71394e-10	5.18539e-09
NCU07363	62.3229	21.7289	-1.43728	2.18956e-17	2.58706e-16
NCU06726	5.96183	2.07304	-1.43376	2.4433e-09	1.38028e-08
NCU02625	1.2188	0.382236	-1.43136	0.0138979	0.0269927
NCU08316	8.5415	3.01106	-1.431	7.04478e-10	4.25055e-09
NCU07901	2.15862	0.781381	-1.42979	0.0231476	0.0424065
NCU02283	26.2907	8.99251	-1.42864	5.69725e-11	3.83691e-10
NCU07756	166.236	59.153	-1.42799	1.50419e-13	1.31657e-12
NCU02429	15.6441	5.46838	-1.42636	4.70406e-12	3.54055e-11
NCU09409	7.1377	1.95301	-1.42543	0.000144527	0.000421166
NCU04605	56.9588	15.6162	-1.42503	2.46613e-11	1.71743e-10
NCU04403	1.83137	0.65974	-1.42479	0.0168264	0.032063
NCU16791	6.58006	1.89078	-1.42438	0.0220961	0.0407337
NCU05987	4.24305	1.50387	-1.4238	1.25723e-07	5.81675e-07
NCU08541	45.3513	15.8956	-1.41946	3.26816e-12	2.50072e-11
NCU07937	21.5038	7.37728	-1.41879	3.46487e-09	1.92345e-08
NCU09737	7.13257	2.48777	-1.41773	2.00741e-05	6.75343e-05
NCU05775	26.0706	9.03934	-1.41489	3.07452e-09	1.71842e-08
NCU03911	91.1853	31.4961	-1.41263	7.42005e-17	8.41587e-16
NCU05553	5.32814	1.04293	-1.40738	2.08246e-09	1.19106e-08
NCU06625	4.99659	1.62537	-1.40625	0.000722252	0.00185373
NCU00350	35.0576	11.8312	-1.40525	2.70012e-12	2.08777e-11
NCU00244	2.63342	0.813448	-1.40371	0.00962455	0.0194175
NCU02194	33.9431	12.7859	-1.40307	2.25287e-20	3.27735e-19
NCU16552	4.14452	1.41074	-1.40173	0.0132294	0.0257965
NCU01425	147.4	53.8661	-1.39722	5.21393e-12	3.90038e-11
NCU07734	72.7551	26.4067	-1.39527	1.56282e-17	1.86951e-16
NCU02388	11.0995	4.16303	-1.39521	2.6195e-07	1.17431e-06
NCU04433	36.9669	13.2325	-1.39436	3.31973e-20	4.78209e-19
NCU06459	32.0717	11.5866	-1.39436	7.99396e-15	7.78353e-14
NCU02759	11.9827	4.24533	-1.39381	5.95419e-08	2.85716e-07
NCU02419	40.9221	12.6621	-1.38932	7.07498e-14	6.32026e-13
NCU08889	1.74268	0.640354	-1.38802	0.000107073	0.000318007
NCU07277	152.243	54.177	-1.38592	3.50565e-14	3.2176e-13
NCU05841	36.842	13.4695	-1.38572	1.68627e-08	8.60794e-08
NCU04949	6.1301	2.41328	-1.38492	0.00675998	0.0141244
NCU08167	26.4942	9.84084	-1.38465	8.928e-11	5.89937e-10
NCU06471	18.9505	5.23211	-1.38072	1.82345e-07	8.31626e-07
NCU08870	31.2581	11.4092	-1.3806	3.98772e-08	1.94782e-07
NCU07167	33.9788	11.8192	-1.37865	4.79404e-10	2.92854e-09
NCU04052	4.41528	1.76305	-1.37617	0.0194093	0.0363449
NCU09816	337.561	122.108	-1.37497	1.109e-19	1.54902e-18
NCU04899	328.195	120.039	-1.37321	4.54263e-16	4.89579e-15
NCU02107	8.63197	2.94438	-1.3717	4.41984e-06	1.6557e-05
NCU04347	11.7259	4.89253	-1.37036	0.000120196	0.000354332
NCU09447	8.58358	2.99708	-1.37024	0.00010025	0.000299124
NCU03086	9.72312	3.46508	-1.36963	5.66178e-07	2.41322e-06
NCU08130	151.023	55.1948	-1.36941	3.39947e-21	5.18085e-20
NCU09018	18.5809	6.96348	-1.36907	2.29433e-09	1.30313e-08
NCU07899	2.78397	1.10268	-1.36851	0.00972666	0.0195998
NCU03887	35.8707	13.0408	-1.36836	1.72677e-18	2.21829e-17
NCU05137	337.987	123.895	-1.365	4.88481e-13	4.03107e-12
NCU02328	20.8696	7.73612	-1.36478	9.28902e-05	0.000279202
NCU02134	72	26.1026	-1.36303	4.87403e-23	8.422e-22
NCU01546	488.868	175.912	-1.36247	8.73366e-15	8.47015e-14
NCU07931	1.57831	0.198729	-1.36125	0.00197599	0.00464112
NCU08145	9.08446	3.17258	-1.36063	1.56268e-05	5.35018e-05
NCU04626	3.17471	1.12847	-1.36036	0.0131913	0.0257426
NCU08288	44.8777	16.8107	-1.3595	1.68858e-11	1.19861e-10
NCU00456	42.8588	15.4143	-1.35842	2.60905e-07	1.17105e-06
NCU10185	4.1589	1.26766	-1.35822	0.00706082	0.0146573
NCU06030	15.5814	5.66635	-1.35723	8.37033e-13	6.78568e-12
NCU05882	11.7354	4.23674	-1.35474	3.37898e-09	1.88144e-08
NCU07123	14.8878	5.4417	-1.35411	1.60612e-11	1.14339e-10
NCU03228	1.89523	0.725007	-1.35242	0.00478947	0.0103479
NCU06906	4.49472	1.6359	-1.34817	1.35497e-05	4.67602e-05
NCU02523	8.2482	3.06679	-1.34757	8.69813e-05	0.000263161
NCU08378	31.9457	11.715	-1.34629	2.25989e-15	2.30084e-14
NCU01330	8.3663	2.99476	-1.34612	3.18059e-07	1.40362e-06
NCU17319	3284.11	1219.6	-1.34512	2.42095e-11	1.69076e-10
NCU09251	43.5822	15.6508	-1.34384	8.24285e-08	3.89446e-07
NCU03667	26.9454	9.72588	-1.34283	1.03649e-13	9.15915e-13
NCU03638	106.381	39.3707	-1.3426	1.10085e-14	1.05926e-13
NCU08895	21.9496	8.22212	-1.342	2.45083e-09	1.38348e-08
NCU09862	39.698	14.5133	-1.33684	3.61663e-12	2.75021e-11
NCU00761	4.62181	1.70076	-1.33674	7.01508e-05	0.000215968
NCU00659	2.70494	0.827974	-1.33634	0.012572	0.024678
NCU03174	22.4016	8.57585	-1.33494	1.18048e-11	8.52599e-11
NCU03127	19.6033	7.34329	-1.33421	5.88044e-11	3.95305e-10
NCU05208	7.01367	2.97481	-1.33279	2.36514e-05	7.89561e-05
NCU02684	40.2027	14.9435	-1.32816	9.12837e-17	1.0243e-15
NCU04486	5.35149	1.71513	-1.32807	0.00695059	0.0144611
NCU02561	24.7172	9.13524	-1.3274	1.73665e-09	1.0042e-08
NCU11128	4.17549	1.87925	-1.32694	0.0155162	0.0298522
NCU07257	947.399	344.426	-1.32355	8.48455e-06	3.04955e-05
NCU01136	5.5483	2.07031	-1.3222	0.00296924	0.00671066
NCU09033	6.25355	2.40837	-1.32182	4.11105e-05	0.000131343
NCU05138	3.36278	2.89339	-1.32153	9.26822e-17	1.03841e-15
NCU07352	171	63.1252	-1.3211	0.00789375	0.0162035
NCU06880	169.854	63.7418	-1.32088	6.88479e-19	9.04981e-18
NCU00473	17.7723	6.7916	-1.32059	4.53965e-07	1.96336e-06
NCU00952	41.6346	15.6652	-1.3202	1.37554e-09	8.03601e-09
NCU04262	56.9515	21.049	-1.31775	8.78029e-10	5.22066e-09
NCU01529	7.5959	2.52354	-1.31651	0.0181814	0.0343009
NCU03567	20.7045	7.87148	-1.31627	3.36431e-14	3.09173e-13
NCU04483	39.0158	14.4889	-1.31383	2.35953e-12	1.83599e-11
NCU10042	1997.02	774.747	-1.30982	1.0703e-18	1.3895e-17
NCU05870	1.80107	0.654318	-1.30884	0.0378632	0.0654097
NCU08166	23.293	8.33802	-1.3085	1.9711e-09	1.13089e-08
NCU05291	12.2695	0.897239	-1.30761	3.80284e-08	1.86122e-07
NCU09754	42.3364	16.3575	-1.30748	9.30529e-12	6.81554e-11
NCU05304	105.073	40.0623	-1.3068	3.21619e-21	4.91169e-20
NCU03085	32.1682	19.0857	-1.30676	8.34611e-10	4.98262e-09
NCU01753	15.8234	6.37358	-1.30548	2.43668e-11	1.69852e-10
NCU00111	50.9022	19.7637	-1.30281	4.05517e-11	2.78193e-10
NCU02117	14.6515	5.2699	-1.30157	0.00067194	0.00173245
NCU00238	0.601525	0.232969	-1.30151	0.0719631	0.115232
NCU03813	33.3876	12.6751	-1.30082	0.000268035	0.000744249
NCU08359	29.7326	11.1772	-1.30072	1.31306e-06	5.30192e-06
NCU00125	5.28665	2.04529	-1.29909	0.00061043	0.00158945
NCU07353	5.46338	2.19892	-1.29809	0.0128296	0.0251234
NCU00089	14.2954	5.57052	-1.29803	6.71283e-08	3.20033e-07
NCU01285	23.1518	8.91545	-1.29756	5.69461e-12	4.24701e-11
NCU07523	13.3521	4.93679	-1.29607	7.14979e-10	4.30684e-09
NCU06870	52.5768	19.6358	-1.2959	4.54121e-14	4.12689e-13
NCU17049	13.2272	4.40161	-1.29557	4.08159e-09	2.24885e-08
NCU07075	55.563	20.817	-1.29156	1.20961e-13	1.06252e-12
NCU07776	307.11	118.202	-1.29121	3.81101e-16	4.1437e-15
NCU05128	2.79891	1.06058	-1.2892	0.00522247	0.0112143
NCU01283	41.6955	15.9532	-1.28763	2.18165e-19	2.96841e-18
NCU06509	72.9688	28.0671	-1.28376	1.55862e-12	1.23233e-11
NCU06181	7.72968	3.01077	-1.28364	1.64375e-07	7.53401e-07
NCU03179	5.54441	2.4485	-1.28181	0.0235738	0.04308
NCU02464	95.3344	36.9901	-1.28061	7.64097e-18	9.38984e-17
NCU09789	68.3383	26.7112	-1.27773	1.09727e-22	1.85679e-21
NCU04338	38.5646	15.4479	-1.27641	8.03596e-09	4.26172e-08
NCU06111	9.82455	3.80141	-1.27629	2.39886e-06	9.32805e-06
NCU05435	13.8534	5.16554	-1.27577	1.68521e-08	8.60794e-08
NCU03850	15.5358	6.11595	-1.27303	0.000112355	0.000332548
NCU09646	23.3569	9.06503	-1.27178	2.5407e-08	1.26794e-07
NCU00958	47.4217	18.6875	-1.2703	2.35656e-09	1.33436e-08
NCU00085	4.42565	1.78626	-1.27001	9.87877e-05	0.00029536
NCU03752	37.5603	14.4517	-1.26921	6.93887e-11	4.614e-10
NCU09207	11.8216	4.4819	-1.26833	2.90326e-07	1.28818e-06
NCU05392	5.16534	2.03596	-1.26763	2.10221e-05	7.05625e-05
NCU01985	172.894	67.1295	-1.2676	6.82529e-17	7.76522e-16
NCU07307	121.574	48.2176	-1.26743	1.68087e-17	1.99885e-16
NCU01258	34.8009	13.7708	-1.26611	2.40808e-07	1.08614e-06
NCU07849	27.0566	10.6437	-1.26543	2.71967e-10	1.70089e-09
NCU11308	7.6461	3.19354	-1.26471	5.80746e-05	0.000180374
NCU10063	6.60566	2.1504	-1.26411	0.00436927	0.00951262
NCU02366	162.591	64.1965	-1.26406	1.15775e-16	1.2854e-15
NCU02467	12.5448	4.85188	-1.26395	9.05494e-05	0.000272723
NCU03059	11.2546	4.38083	-1.26338	2.17935e-06	8.51948e-06
NCU16377	6.73763	1.59412	-1.26219	3.0774e-06	1.17799e-05
NCU07061	39.9534	7.01951	-1.26215	2.1491e-09	1.22632e-08
NCU00487	18.4672	7.29753	-1.26188	4.25894e-05	0.000135714
NCU00072	18.8698	7.33729	-1.26159	3.32207e-07	1.46167e-06
NCU07930	527.385	200.133	-1.26155	5.39208e-24	9.94764e-23
NCU05364	29.8779	11.7631	-1.26075	1.97382e-14	1.85322e-13
NCU03031	105.576	41.4086	-1.25843	6.9939e-16	7.41817e-15
NCU08044	56.3111	20.9129	-1.25748	1.35788e-14	1.29474e-13
NCU09798	16.1735	6.37395	-1.25735	2.86832e-06	1.10312e-05
NCU08228	22.2433	9.02739	-1.25617	0.00027234	0.000755064
NCU04592	25.6868	9.62712	-1.25575	3.76757e-07	1.64881e-06
NCU02110	28.9883	11.365	-1.25575	2.08084e-13	1.78105e-12
NCU05862	2.60077	0.90282	-1.25544	0.0118509	0.0233872
NCU01754	1436.39	557.822	-1.25482	1.4561e-10	9.37738e-10
NCU06785	402.628	158.867	-1.25443	3.2717e-14	3.01037e-13
NCU06189	41.4862	16.3395	-1.25323	1.59347e-11	1.13548e-10
NCU07172	7.27255	2.92419	-1.2531	4.05752e-06	1.52618e-05
NCU02250	2379.4	942.449	-1.25224	1.45409e-31	3.90642e-30
NCU16778	3.52875	1.26531	-1.25188	0.00867139	0.0176851
NCU06565	9.84533	3.52949	-1.25113	6.41233e-09	3.45038e-08
NCU02660	39.7699	15.723	-1.25002	1.09216e-08	5.72197e-08
NCU02214	6.76673	2.59057	-1.24983	8.45542e-06	3.04056e-05
NCU09885	3.95891	1.63427	-1.24933	0.002316	0.0053644
NCU09995	881.986	349.727	-1.24913	1.88864e-27	4.18743e-26
NCU01748	106.825	42.743	-1.24771	7.50106e-18	9.23333e-17
NCU08134	6.38043	2.40957	-1.24626	6.43984e-06	2.35254e-05
NCU01356	6.45854	2.11278	-1.24381	0.000423098	0.00113334
NCU07732	95.5555	37.8281	-1.24236	1.84434e-13	1.59908e-12
NCU00680	61.5548	25.0536	-1.23681	6.82593e-09	3.66222e-08
NCU08156	2.7376	1.16439	-1.23602	0.0395945	0.0679591
NCU00270	17.3826	6.93325	-1.23434	4.57743e-08	2.21966e-07
NCU01238	10.0779	3.98303	-1.23429	5.89989e-11	3.96251e-10
NCU07079	49.5698	19.1321	-1.23385	1.04841e-12	8.42506e-12
NCU06935	1.13186	0.478083	-1.23042	0.0223268	0.041087
NCU00863	5.27091	2.07978	-1.22876	9.88559e-05	0.000295444
NCU03748	173.697	69.3909	-1.2286	7.88944e-18	9.66293e-17
NCU08315	1.74794	0.576242	-1.22672	0.0453433	0.0767469
NCU00894	92.6794	36.8834	-1.22576	2.19119e-14	2.04948e-13
NCU06320	2.29859	1.01007	-1.22495	0.0256833	0.0465423
NCU15831	3.04508	1.31438	-1.22285	0.000768172	0.00196269
NCU00811	626.695	253.379	-1.2226	9.15805e-14	8.1122e-13
NCU01838	30.1299	11.643	-1.22257	6.14733e-07	2.6096e-06
NCU07897	1.56224	0.641995	-1.21999	0.050184	0.0837463
NCU02370	15.8837	6.46104	-1.21884	0.000152217	0.000441478
NCU05135	2.63899	1.10641	-1.21837	0.0137339	0.0267094
NCU01910	5.69764	2.25422	-1.21749	9.30677e-07	3.84872e-06
NCU06724	523.684	210.23	-1.21738	2.97119e-21	4.55645e-20
NCU03565	931.684	371.46	-1.21709	4.74016e-25	9.37965e-24
NCU01810	21.3316	8.61224	-1.2167	1.70923e-07	7.82443e-07
NCU00905	22.8555	9.26816	-1.21659	1.54633e-10	9.91511e-10
NCU09156	6.98666	2.82114	-1.21126	0.00175501	0.00417404
NCU08792	26.0656	10.8067	-1.21116	7.92068e-12	5.83625e-11
NCU07454	8.12432	3.26979	-1.20984	0.00242525	0.0055771
NCU02264	51.2557	21.2124	-1.2091	2.75682e-12	2.12714e-11
NCU01333	43.6999	18.1884	-1.20881	3.28737e-15	3.31939e-14
NCU02856	10.7128	4.23367	-1.20751	0.00124078	0.00303434
NCU00135	39.2991	15.9646	-1.20719	1.56701e-08	8.03258e-08
NCU08028	14.3016	5.74348	-1.20676	3.70336e-05	0.000119302
NCU00028	45.2095	11.785	-1.20607	5.86709e-09	3.16625e-08
NCU05377	8.95685	3.54593	-1.20513	1.63077e-06	6.48521e-06
NCU09474	12.2204	4.3579	-1.20449	1.08658e-05	3.81861e-05
NCU03633	71.1511	29.4573	-1.20073	1.50366e-14	1.42501e-13
NCU01645	93.712	35.1633	-1.20054	9.04406e-13	7.30557e-12
NCU08550	135.095	58.2381	-1.19771	6.43381e-13	5.27974e-12
NCU02481	20.2291	8.19721	-1.19651	2.37518e-09	1.34283e-08
NCU04238	37.7501	15.2058	-1.19605	4.24222e-12	3.21596e-11
NCU06532	64.4363	26.3221	-1.19395	7.51019e-15	7.3319e-14
NCU00728	2.33883	1.04942	-1.19172	0.0120588	0.0237508
NCU04497	6.69019	1.44612	-1.18987	0.000231352	0.000647099
NCU07774	38.2787	15.2463	-1.18979	4.57146e-12	3.45133e-11
NCU02937	10.4676	3.83022	-1.18932	0.000688992	0.00177393
NCU00906	7.94676	3.19164	-1.18896	0.000149503	0.000434634
NCU09739	20.0986	8.0193	-1.18886	4.06733e-05	0.000130116
NCU01024	43.346	18.0623	-1.18809	7.11242e-12	5.26176e-11
NCU01343	30.8619	12.3578	-1.18711	9.09144e-08	4.26799e-07
NCU06963	11.3439	4.59245	-1.18315	0.000190416	0.000540343
NCU09240	16.1133	6.52768	-1.18274	1.39795e-07	6.43548e-07
NCU08683	21.5272	8.70739	-1.17984	1.81098e-09	1.04554e-08
NCU04775	15.9707	6.6435	-1.17824	3.88e-05	0.000124393
NCU03894	12.9035	5.33066	-1.17807	1.34652e-09	7.87898e-09
NCU07949	3.32687	1.45452	-1.17636	2.29515e-06	8.95314e-06
NCU06430	15.3218	6.30451	-1.17619	3.97484e-07	1.73437e-06
NCU00545	17.4762	7.34889	-1.17613	1.39e-11	9.94342e-11
NCU03490	1.1379	0.459718	-1.17601	0.115986	0.174204
NCU09996	6.17223	2.37698	-1.17528	0.00479982	0.0103672
NCU00153	7.10904	3.04027	-1.17413	0.00171461	0.00408587
NCU04129	34.7607	14.4216	-1.17329	3.25086e-10	2.01597e-09
NCU01938	10.464	4.03174	-1.17148	7.18547e-07	3.02726e-06
NCU03607	46.6079	16.9776	-1.1703	1.98351e-11	1.39987e-10
NCU09115	15.6751	5.97566	-1.16884	2.89349e-08	1.43524e-07
NCU16807	8.74247	3.2143	-1.16867	0.0149979	0.0289383
NCU01914	86.7359	36.8556	-1.1674	8.06301e-17	9.0891e-16
NCU00027	18.4571	14.4932	-1.16736	1.60003e-07	7.34278e-07
NCU06519	1.81425	0.756197	-1.16637	0.0386024	0.0664528
NCU08742	5.3591	2.31047	-1.16596	0.0050329	0.0108357
NCU03333	110.831	46.4494	-1.16582	1.19564e-11	8.62012e-11
NCU01550	125.306	52.0287	-1.1658	1.87701e-16	2.06219e-15
NCU09579	7.66795	3.28074	-1.1658	0.000871039	0.00219655
NCU07860	4.74189	1.79399	-1.16292	0.00350127	0.00779578
NCU04757	41.0813	17.4034	-1.16174	9.53398e-14	8.43505e-13
NCU00042	26.0315	11.1588	-1.15641	1.5734e-05	5.3844e-05
NCU03126	166.911	71.0293	-1.15543	1.06056e-11	7.69903e-11
NCU03190	1.73314	0.652262	-1.1543	0.0526751	0.0875658
NCU04549	8.33501	3.69368	-1.15379	0.0027132	0.00617559
NCU16844	292.329	123.924	-1.15174	1.54674e-15	1.59238e-14
NCU07494	22.5809	9.31053	-1.1506	3.09754e-06	1.18385e-05
NCU09069	8.32915	3.85582	-1.14976	0.000268613	0.000745574
NCU02585	20.1656	8.51453	-1.1493	1.97731e-09	1.13357e-08
NCU05985	22.044	9.65431	-1.14845	1.5033e-11	1.07435e-10
NCU14146	17.1124	7.33007	-1.14725	9.62529e-08	4.51573e-07
NCU02059	20.3666	8.11299	-1.14685	3.2023e-05	0.00010444
NCU10058	110.52	46.603	-1.14562	3.65736e-18	4.57854e-17
NCU01636	3.87689	1.56733	-1.14275	0.069902	0.112249
NCU02316	14.0979	6.19021	-1.14247	3.00053e-07	1.32654e-06
NCU05693	11.55	4.76416	-1.14168	0.000321484	0.000879718
NCU02041	182.742	77.4939	-1.14146	1.22098e-14	1.17303e-13
NCU03936	19.4419	8.54793	-1.13959	2.86324e-06	1.10174e-05
NCU01692	362.03	153.398	-1.13821	6.15915e-19	8.15422e-18
NCU06403	14.8906	6.49036	-1.13766	2.63206e-07	1.17922e-06
NCU07675	13.0337	5.45156	-1.13749	3.70594e-05	0.000119333
NCU07120	15.7182	6.82567	-1.13734	2.46179e-08	1.23106e-07
NCU08772	13.528	5.81126	-1.13658	5.61009e-07	2.39396e-06
NCU05545	3.43333	1.50033	-1.13569	0.000476058	0.00126325
NCU01215	15.8985	6.69695	-1.13455	7.58823e-07	3.18636e-06
NCU02319	19.4414	8.5427	-1.13352	6.82031e-07	2.88302e-06
NCU02247	4.76388	2.16668	-1.13336	6.9363e-06	2.52263e-05
NCU06987	16.5555	6.9309	-1.13238	1.51758e-08	7.79005e-08
NCU04762	17.4696	7.77987	-1.13195	8.95866e-07	3.7152e-06
NCU00520	61.1599	26.1384	-1.13082	1.53686e-10	9.86295e-10
NCU01509	43.7506	18.4215	-1.13043	1.12481e-12	9.0095e-12
NCU08126	3.40267	1.50479	-1.1284	0.0119981	0.0236524
NCU05209	6.78311	2.41421	-1.12645	0.00148741	0.00358391
NCU16364	6.70179	2.47622	-1.12632	0.0299386	0.0531929
NCU08336	135.869	58.9672	-1.1237	4.84543e-12	3.63951e-11
NCU03559	296.913	127.423	-1.12286	3.20082e-17	3.73396e-16
NCU01242	10.1433	4.3974	-1.11959	5.86558e-06	2.15237e-05
NCU07432	43.7889	19.0958	-1.1193	4.63152e-06	1.72708e-05
NCU03468	3.1183	1.23463	-1.11606	0.0268539	0.0484015
NCU09681	4.39496	1.95584	-1.11487	0.00348384	0.00776402
NCU07477	2.0109	0.879257	-1.1136	0.00578509	0.0122579
NCU03823	7.69911	3.08024	-1.11078	0.00044351	0.00118157
NCU02536	17.9712	7.83262	-1.11025	1.43396e-06	5.74287e-06
NCU04639	125.861	44.3393	-1.10877	2.40926e-06	9.3586e-06
NCU07049	7.33534	3.30153	-1.10701	0.0163592	0.0312374
NCU01703	30.1093	12.6244	-1.10675	7.92664e-09	4.20981e-08
NCU03053	8.30534	3.5564	-1.10515	8.99048e-05	0.000270892
NCU05282	5.33775	2.35486	-1.10492	5.39135e-05	0.000168302
NCU00904	37.251	15.2486	-1.10462	1.59884e-10	1.02251e-09
NCU02942	30.6265	13.3121	-1.10458	1.06529e-08	5.59316e-08
NCU00580	8.30542	3.58268	-1.10326	0.00166789	0.00398098
NCU10346	10.6226	4.65543	-1.09996	9.73326e-12	7.10074e-11
NCU10059	4.38609	1.8925	-1.09778	0.0163075	0.0311709
NCU04454	21.7327	9.85773	-1.09771	2.08309e-07	9.44188e-07
NCU07773	32.6448	14.3826	-1.0975	3.94258e-07	1.72336e-06
NCU07738	32.9841	14.4049	-1.09703	2.11833e-06	8.30298e-06
NCU04053	20.184	8.82553	-1.09575	2.85932e-12	2.19932e-11
NCU00917	7.20394	3.20318	-1.09415	0.00105123	0.002599
NCU00658	0.494726	0.238734	-1.09218	0.0270771	0.0487202
NCU00717	1.88136	0.988633	-1.09071	0.00471077	0.0101868
NCU04280	42.7234	18.591	-1.0905	6.35148e-11	4.25148e-10
NCU06915	17.6486	4.05047	-1.09001	8.78472e-07	3.65508e-06
NCU02540	7.33377	3.45964	-1.08987	0.00416935	0.009107
NCU06460	29.2601	12.5505	-1.08781	3.9667e-07	1.73184e-06
NCU03851	9.5855	4.21491	-1.08652	0.0017856	0.00423584
NCU02320	1.06457	0.461044	-1.08592	0.0937246	0.144847
NCU04622	31.3789	14.0665	-1.08422	4.3827e-07	1.89883e-06
NCU05491	24.0759	11.0362	-1.08351	7.63925e-07	3.20596e-06
NCU16771	9.61234	3.86836	-1.08338	0.000454833	0.00120998
NCU01274	9.31182	4.16474	-1.08325	1.4057e-05	4.84654e-05
NCU00847	47.061	19.9411	-1.08276	6.17738e-08	2.95463e-07
NCU00579	27.1113	11.8781	-1.08269	2.21708e-12	1.73038e-11
NCU06537	4.69106	2.04207	-1.08253	0.00983497	0.0197963
NCU00321	17.6657	7.93789	-1.08238	1.18186e-05	4.1211e-05
NCU00549	24.9357	11.1542	-1.08136	2.01699e-06	7.92266e-06
NCU16725	21.6397	9.62187	-1.08093	2.40577e-08	1.20631e-07
NCU03506	31.7022	13.6153	-1.08043	7.79955e-06	2.82125e-05
NCU06226	1197.91	518.965	-1.07945	5.00654e-14	4.52186e-13
NCU01786	44.2804	19.436	-1.0793	2.83232e-07	1.2605e-06
NCU01831	12.8893	5.71825	-1.07772	3.5025e-06	1.32791e-05
NCU08822	1.38711	0.677534	-1.07704	8.73848e-06	3.13164e-05
NCU16806	4.39926	2.03258	-1.07703	0.0493256	0.0825571
NCU10381	16.7756	7.67813	-1.0767	1.46935e-06	5.8782e-06
NCU03263	81.7912	36.593	-1.0766	1.0218e-15	1.07449e-14
NCU01967	18.3627	7.3317	-1.07592	1.53341e-05	5.25484e-05
NCU08434	127.698	56.5083	-1.0744	1.49452e-13	1.30967e-12
NCU06538	8.85134	3.72345	-1.07368	0.000216869	0.000610235
NCU01871	318.838	147.155	-1.07253	1.21844e-06	4.94427e-06
NCU00930	66.5525	29.5139	-1.07205	2.99773e-08	1.48299e-07
NCU02376	13.8715	5.8896	-1.07166	0.000420126	0.00112743
NCU09799	9.0942	4.10986	-1.07132	0.000936881	0.00234093
NCU04337	99.5906	44.2789	-1.07074	2.04958e-13	1.76044e-12
NCU03909	0.129272	0.069533	-1.06942	0.0652254	0.10536
NCU17019	18.9422	8.29787	-1.0694	1.35668e-06	5.45713e-06
NCU06211	66.5803	30.2728	-1.06711	1.54619e-09	8.99012e-09
NCU00743	143.327	64.6067	-1.06502	5.58444e-10	3.39167e-09
NCU05234	73.4458	33.1113	-1.06473	1.97059e-11	1.39209e-10
NCU11311	75.7813	34.3339	-1.0647	7.17477e-09	3.83262e-08
NCU08701	19.1062	8.48307	-1.06465	8.61683e-10	5.13175e-09
NCU06695	257.107	115.934	-1.06448	2.91008e-16	3.17821e-15
NCU08610	24.9711	10.9117	-1.06388	7.45507e-10	4.47973e-09
NCU06215	5.11776	2.42822	-1.06351	0.000869639	0.00219377
NCU06811	2.70819	1.18089	-1.06188	0.0943798	0.145737
NCU01421	7.7895	3.39516	-1.06126	0.000896448	0.00225444
NCU03883	36.4476	17.3415	-1.06063	2.61947e-05	8.67772e-05
NCU02887	73.8264	33.4684	-1.06055	4.49727e-08	2.188e-07
NCU05260	3.07631	1.36041	-1.05962	0.00309815	0.00696775
NCU02005	54.1974	23.9053	-1.05914	1.49156e-09	8.69996e-09
NCU09931	14.2091	6.39509	-1.05636	1.22332e-05	4.25361e-05
NCU05094	3.56639	1.64324	-1.05493	0.121389	0.181356
NCU04779	1195.67	541.196	-1.05379	4.82825e-17	5.57939e-16
NCU00890	2.45788	0.715564	-1.05299	0.000605663	0.00157871
NCU01901	5.36875	2.50164	-1.05247	4.75454e-05	0.000150014
NCU07974	14.8877	7.1635	-1.05192	2.40291e-06	9.33887e-06
NCU03485	16.3699	7.36888	-1.05101	2.41573e-05	8.05352e-05
NCU02790	8.63493	3.91992	-1.05043	0.000374106	0.00101094
NCU08886	16.7493	7.73662	-1.04834	2.58613e-05	8.57115e-05
NCU01426	15.0972	6.92709	-1.0471	1.51402e-06	6.04377e-06
NCU17258	3.43097	1.43594	-1.04649	0.0967815	0.148821
NCU00575	151.323	68.8863	-1.04426	9.28386e-18	1.12956e-16
NCU02549	567.854	258.685	-1.04406	5.09706e-15	5.09775e-14
NCU10080	2.85737	1.3614	-1.04301	0.00753955	0.0155328
NCU08372	3.29204	1.34576	-1.04152	0.00875857	0.0178543
NCU03784	3.08253	1.3954	-1.04129	0.000758085	0.00193759
NCU00862	6.80832	2.86153	-1.04067	0.00172192	0.00410107
NCU00629	234.646	107.844	-1.03969	1.34933e-14	1.28825e-13
NCU06669	3.16306	1.44702	-1.03936	0.0291806	0.0520636
NCU05855	2.90026	1.46263	-1.03907	0.00759701	0.0156336
NCU01349	2.20911	0.789451	-1.03862	0.00401669	0.0088154
NCU05023	105.691	49.2446	-1.03791	1.7674e-07	8.0706e-07
NCU08092	33.5052	15.214	-1.03598	5.48886e-09	2.97303e-08
NCU02114	96.092	43.5959	-1.03559	1.53857e-11	1.09849e-10
NCU06983	90.493	40.8989	-1.03533	8.13749e-13	6.61879e-12
NCU04380	68.2581	31.6647	-1.03463	1.67262e-13	1.45534e-12
NCU03780	11.3891	4.671	-1.03449	0.0138408	0.026889
NCU02063	11.8613	5.44684	-1.03424	2.33229e-06	9.08838e-06
NCU07142	22.2711	9.69557	-1.03342	0.00119644	0.00293078
NCU06863	315.951	145.33	-1.03247	2.31554e-17	2.7228e-16
NCU04320	14.1002	6.30945	-1.0314	1.23947e-05	4.30569e-05
NCU08298	15.7477	7.022	-1.0313	2.45355e-06	9.5156e-06
NCU02598	29.0436	12.4416	-1.0311	4.65522e-05	0.000147259
NCU09867	3.5065	1.5523	-1.03102	0.000557037	0.00146101
NCU07344	11.9975	4.03046	-1.03026	0.0274689	0.0493408
NCU06783	570.839	259.707	-1.03019	5.84993e-11	3.93614e-10
NCU04460	19.5574	7.36088	-1.02797	2.70598e-07	1.20793e-06
NCU03563	19.4277	9.07321	-1.02785	1.04885e-06	4.29877e-06
NCU05893	5.9613	3.50624	-1.02581	0.0143308	0.0277603
NCU00643	4.62976	1.86961	-1.02417	0.0213994	0.0395806
NCU04472	30.8332	14.0944	-1.02386	8.76664e-09	4.62921e-08
NCU00793	131.033	59.5951	-1.02238	2.08196e-12	1.62862e-11
NCU01713	18.9032	8.2843	-1.02205	3.11378e-07	1.37496e-06
NCU17136	3.55782	1.46321	-1.02127	0.0446155	0.0756194
NCU02218	11.7443	5.3973	-1.01906	2.4487e-06	9.50178e-06
NCU06931	2.29467	0.996532	-1.01818	0.0131683	0.0257181
NCU02629	127.681	59.2136	-1.01738	2.33384e-12	1.81793e-11
NCU07711	62.9008	29.3279	-1.01675	2.23783e-09	1.27202e-08
NCU06731	1.97543	0.880047	-1.01439	0.0629207	0.10213
NCU00760	3.5822	1.94479	-1.01391	0.0174415	0.0330979
NCU02121	11.1781	5.27217	-1.01223	4.41899e-06	1.6557e-05
NCU16817	16.3846	7.57486	-1.01192	0.00261426	0.00597256
NCU16332	12.7201	6.10544	-1.01151	9.69274e-07	3.99486e-06
NCU04618	3.87417	1.61087	-1.01145	0.00287514	0.00651798
NCU09723	7.5592	3.39866	-1.01038	0.00711311	0.0147465
NCU07947	137.768	64.2616	-1.00939	8.27702e-14	7.35835e-13
NCU02479	58.4647	27.5146	-1.00899	6.14504e-11	4.12339e-10
NCU05419	19.2637	9.28168	-1.00892	0.000230014	0.000644022
NCU08850	1.80511	0.819963	-1.00855	0.0394672	0.0677831
NCU07027	351.916	163.944	-1.00716	3.73901e-09	2.07086e-08
NCU03781	72.7663	33.6263	-1.00626	1.49159e-10	9.58918e-10
NCU16856	11.1176	5.0315	-1.00531	0.00720315	0.0148939
NCU10400	11.9517	5.46455	-1.00361	8.061e-06	2.91153e-05
NCU07761	12.1663	5.55174	-1.00301	0.000630928	0.00163761
NCU04416	5.45174	2.514	-1.00246	0.0106158	0.0211712
NCU07807	1238.6	562.268	-1.00204	2.22554e-13	1.89609e-12
NCU03257	113.495	53.4143	-1.00203	7.83641e-13	6.38095e-12
NCU06142	8.38664	3.72727	-1.00197	0.00114117	0.0028033
NCU00112	37.8885	18.1929	-1.00184	2.99032e-07	1.32282e-06
NCU06025	1.98867	0.787157	-1.00167	0.0946806	0.14614
NCU09892	24.4955	11.4505	-1.00129	2.15609e-06	8.43752e-06
NCU06362	17.9255	8.40156	-1.00109	1.08605e-07	5.06616e-07
NCU11176	4.02133	1.81037	-0.998512	0.000992258	0.00246507
NCU05996	105.734	49.3021	-0.997952	1.30773e-15	1.36348e-14
NCU16657	18.9476	8.92403	-0.997222	5.35737e-05	0.000167455
NCU06401	16.9206	8.17587	-0.996657	1.25201e-08	6.50852e-08
NCU00281	3.29908	1.40444	-0.995293	0.00127416	0.00310464
NCU08565	16.7366	7.78721	-0.993378	2.28366e-10	1.44045e-09
NCU06682	53.613	24.0517	-0.992064	0.000129212	0.000378786
NCU03608	317.349	151.243	-0.991779	7.83598e-09	4.17069e-08
NCU05756	4.62201	2.05858	-0.990873	0.0316656	0.0558434
NCU05525	74.2514	37.191	-0.990546	1.06498e-07	4.97103e-07
NCU05776	53.8339	24.7264	-0.990069	1.90065e-10	1.20768e-09
NCU08002	48.1053	22.5734	-0.989866	2.45596e-09	1.38531e-08
NCU09363	3.80524	1.92882	-0.989548	0.0199274	0.0371827
NCU05254	6.36303	3.06031	-0.987798	0.00188742	0.00445313
NCU07442	42.693	20.4229	-0.98655	9.04091e-08	4.24698e-07
NCU01158	2.42704	1.09868	-0.985387	0.0155215	0.0298546
NCU04412	57.8423	25.6151	-0.984953	7.96767e-08	3.77413e-07
NCU09253	12.0755	5.82812	-0.984741	6.52469e-05	0.000201292
NCU10008	145.437	69.5893	-0.983443	1.1652e-08	6.08299e-08
NCU06110	10658.3	5033.28	-0.982484	3.56653e-09	1.97839e-08
NCU05211	4.96392	2.41631	-0.982152	7.53434e-05	0.0002307
NCU08563	12.0487	5.83716	-0.980749	3.40216e-07	1.49334e-06
NCU04387	78.9868	25.9336	-0.979134	1.93356e-08	9.77534e-08
NCU02150	3.48325	1.7765	-0.978622	0.0271733	0.0488814
NCU07530	8.05768	3.68076	-0.977799	0.000655264	0.0016948
NCU03421	3.59402	1.62112	-0.977265	0.00467999	0.0101262
NCU05851	1.87105	1.02246	-0.977037	0.0880175	0.136918
NCU02430	22.2446	10.4728	-0.975863	8.3478e-07	3.48543e-06
NCU09135	4.10642	1.48469	-0.975013	0.00586745	0.012411
NCU04881	3.07206	1.63739	-0.973982	0.00669944	0.0140098
NCU17318	382.675	228.007	-0.973616	2.3857e-05	7.96063e-05
NCU05280	6.7407	3.1616	-0.973077	0.00466649	0.0101059
NCU01400	21.9148	12.6756	-0.972513	0.000174554	0.000499764
NCU07879	16.6915	7.78259	-0.971332	6.03894e-06	2.21267e-05
NCU00373	82.8312	39.3752	-0.970084	2.41811e-11	1.69076e-10
NCU08227	13.7298	6.48245	-0.969681	0.000471674	0.00125297
NCU08823	105.651	50.3646	-0.967925	4.91376e-12	3.68371e-11
NCU00252	6.23904	3.03005	-0.967624	0.00332067	0.00743866
NCU06495	233.305	108.749	-0.966991	1.19641e-12	9.57255e-12
NCU01528	3608.46	1720.23	-0.965816	1.24863e-10	8.09794e-10
NCU02637	137.172	66.075	-0.965001	1.50418e-14	1.42501e-13
NCU00765	2.16227	0.954825	-0.962759	0.111344	0.168297
NCU03265	3.7723	2.13954	-0.962739	0.0335131	0.0587218
NCU00954	17.2667	8.13697	-0.962464	1.72287e-05	5.86859e-05
NCU03777	70.5762	33.813	-0.961751	3.36263e-06	1.27985e-05
NCU03045	13.0578	6.25144	-0.961272	8.3527e-06	3.00804e-05
NCU00447	87.8726	42.3233	-0.960625	6.9813e-14	6.24415e-13
NCU05915	15.9044	7.50824	-0.960459	8.20334e-05	0.000249318
NCU09728	2.72274	1.32602	-0.960346	0.00591719	0.0124983
NCU09147	8.30731	3.87249	-0.959118	0.00754278	0.0155351
NCU03369	17.5571	8.50071	-0.958555	0.00073499	0.00188445
NCU04371	5.38544	2.40524	-0.958373	0.0268467	0.0484003
NCU03306	41.0956	19.8339	-0.958272	5.54897e-07	2.37333e-06
NCU00277	4.68279	2.21299	-0.958097	0.00124311	0.00303803
NCU05316	1.08123	0.471622	-0.957786	0.0712129	0.114279
NCU05153	3.53303	1.82988	-0.956317	0.0160523	0.030739
NCU01680	1266.98	615.465	-0.956111	9.40177e-12	6.87936e-11
NCU07753	2.05069	1.00908	-0.955713	0.0383467	0.0661272
NCU08632	15.7138	7.61654	-0.953963	2.57511e-08	1.28424e-07
NCU04463	22.3289	10.8723	-0.952458	1.03582e-07	4.84416e-07
NCU09159	3.71076	1.78971	-0.950836	0.0201657	0.0375511
NCU06402	519.462	251.26	-0.949415	9.02512e-11	5.9582e-10
NCU00620	8.14024	3.84894	-0.949343	0.00323114	0.00725134
NCU04174	19.1474	9.81745	-0.949216	0.00114135	0.0028033
NCU00100	27.53	13.3501	-0.948989	2.50379e-09	1.41121e-08
NCU05640	10.1063	5.00344	-0.948863	1.69907e-05	5.79558e-05
NCU02450	38.1683	18.2469	-0.948038	3.21961e-09	1.79678e-08
NCU02046	10.7085	5.40561	-0.947439	0.0010173	0.00252372
NCU02906	4.11145	1.97256	-0.946107	0.0100311	0.0201361
NCU03088	8.72584	4.37864	-0.94496	0.000278644	0.000769932
NCU00742	44.4798	18.0811	-0.944152	3.71744e-05	0.000119546
NCU16635	7849.46	3804.78	-0.943745	5.24731e-10	3.19747e-09
NCU08021	8.07255	4.04671	-0.94365	8.49297e-06	3.05108e-05
NCU01764	10.8039	4.63963	-0.94341	0.00456936	0.00991307
NCU08048	32.7781	15.6434	-0.942885	6.5437e-07	2.77466e-06
NCU06989	60.7157	28.8595	-0.942095	7.93599e-08	3.76154e-07
NCU04310	6.6543	3.21772	-0.941259	5.49501e-05	0.000171248
NCU09374	8.61775	4.25687	-0.940334	9.19344e-06	3.28032e-05
NCU01597	3.71331	1.82975	-0.937017	2.64961e-05	8.76969e-05
NCU11341	3.06347	1.55875	-0.936834	0.0350378	0.0611459
NCU11261	6.76399	3.36865	-0.935365	0.00899595	0.0182774
NCU08537	1.89995	0.985969	-0.932056	0.0264239	0.0477316
NCU16770	10.0629	4.94221	-0.931719	0.00926246	0.0187723
NCU02413	17.4231	8.63804	-0.931234	4.50439e-07	1.94926e-06
NCU07496	1.73238	0.826755	-0.929956	0.0187049	0.035178
NCU03737	143.751	71.9321	-0.928501	5.17842e-07	2.22394e-06
NCU04276	4560.87	2210.18	-0.928318	1.22503e-06	4.96828e-06
NCU10836	12.8271	6.44541	-0.927502	4.41116e-05	0.00014002
NCU00649	41.6411	20.7622	-0.926411	1.65624e-08	8.46639e-08
NCU16638	11.1022	5.60414	-0.926169	0.00117411	0.00287992
NCU05307	3.38037	1.63401	-0.925907	0.0194269	0.0363686
NCU08411	107.226	54.761	-0.9251	1.52746e-07	7.02288e-07
NCU10852	42.4758	19.4398	-0.924904	0.00717886	0.014852
NCU04675	5.89612	2.70301	-0.92449	0.0197858	0.0369559
NCU11348	161.035	79.1135	-0.921608	6.14266e-12	4.5719e-11
NCU07381	2.66855	1.34758	-0.921091	0.018161	0.0342777
NCU02592	18.1017	9.10351	-0.919081	7.23422e-06	2.62192e-05
NCU01393	14.0895	6.64376	-0.918742	0.000334834	0.000911505
NCU01704	16.8713	8.47489	-0.918344	3.93335e-05	0.000126049
NCU08399	2.84414	1.44261	-0.91795	0.004004	0.00879278
NCU06393	14.4737	7.19779	-0.914862	6.46602e-06	2.35976e-05
NCU07168	1.68752	1.04352	-0.914241	0.0324705	0.0571397
NCU04721	2.25529	1.10453	-0.913819	0.026277	0.0474895
NCU09999	42.084	20.2595	-0.913303	4.52776e-11	3.08887e-10
NCU08072	37.1081	18.0005	-0.912979	2.46611e-08	1.23238e-07
NCU04108	13.6526	6.84218	-0.912898	0.000223907	0.000628835
NCU06587	33.1358	15.8238	-0.912687	2.98307e-06	1.14545e-05
NCU06003	162.589	79.9698	-0.91254	2.0967e-12	1.63841e-11
NCU01219	161.344	79.9917	-0.912393	7.99585e-10	4.78127e-09
NCU01741	27.1946	13.0135	-0.91222	0.0040962	0.00896051
NCU09357	1.37361	0.670891	-0.910669	0.0269598	0.0485449
NCU06606	210.831	105.562	-0.910652	1.56103e-09	9.06927e-09
NCU06877	27.8846	13.591	-0.910284	1.40433e-06	5.63032e-06
NCU09408	7.04402	3.77084	-0.909465	0.00148565	0.00358084
NCU05900	29.604	13.4069	-0.909293	0.00358724	0.0079655
NCU05345	20.7532	10.6377	-0.907757	1.43504e-05	4.94076e-05
NCU04212	9.22891	4.56621	-0.906481	4.22332e-05	0.000134638
NCU02415	10.3496	5.34708	-0.905737	9.70901e-05	0.000290875
NCU05752	38.3166	19.5299	-0.904261	8.56362e-08	4.03048e-07
NCU02026	31.5582	15.9418	-0.903367	1.0607e-07	4.95419e-07
NCU02190	11.9094	5.53645	-0.903139	0.0118341	0.0233666
NCU02671	127.477	65.2787	-0.903029	4.027e-07	1.75609e-06
NCU09364	18.1803	6.18369	-0.902877	4.97458e-05	0.000156153
NCU07008	1.71226	0.800897	-0.902661	0.226373	0.307953
NCU03393	1112.25	560.038	-0.902394	2.38961e-14	2.22376e-13
NCU08943	12.754	6.2785	-0.900955	0.00348495	0.00776414
NCU08287	87.9411	44.5588	-0.900326	2.87196e-09	1.6099e-08
NCU09120	6.03391	3.14444	-0.900146	5.74052e-05	0.00017837
NCU04435	14.1072	6.86647	-0.900002	0.000893794	0.00224854
NCU02407	221.478	111.013	-0.899927	7.90168e-12	5.82809e-11
NCU09430	3.2965	1.54278	-0.899368	0.11158	0.168549
NCU01654	27.3321	13.7529	-0.898337	4.73786e-06	1.76406e-05
NCU09517	38.2206	18.9396	-0.898261	5.01282e-06	1.85891e-05
NCU14026	10.4503	4.38803	-0.898017	0.0134797	0.0262429
NCU08551	9.54849	4.8928	-0.89793	8.74858e-05	0.000264578
NCU00417	53.7422	26.1356	-0.897707	4.17927e-06	1.56877e-05
NCU02765	192.628	92.2618	-0.896768	1.211e-05	4.21475e-05
NCU01142	176.709	87.8916	-0.896502	1.17476e-10	7.6526e-10
NCU06666	190.224	97.9514	-0.895382	1.68471e-07	7.71694e-07
NCU09812	8.43672	4.31084	-0.895299	6.8772e-05	0.000212078
NCU05550	5.76233	2.86239	-0.895046	0.00655449	0.0137457
NCU06867	4.34988	2.31948	-0.894754	0.00521935	0.0112109
NCU02588	69.0235	33.241	-0.894524	4.2468e-07	1.84647e-06
NCU04986	6.63184	5.78555	-0.893826	3.70765e-05	0.000119335
NCU06239	20.7535	10.4897	-0.892112	8.30402e-06	2.99343e-05
NCU08696	3.47186	1.71607	-0.892101	0.00411516	0.00899397
NCU10053	27.9985	14.1727	-0.891625	4.15788e-05	0.000132782
NCU03639	8.52867	4.10311	-0.891118	0.0855069	0.133634
NCU04817	43.6976	22.4364	-0.890635	4.82243e-08	2.33232e-07
NCU01104	12.8038	6.60455	-0.890157	0.000148219	0.00043124
NCU09308	9.19527	4.58961	-0.889136	0.000701174	0.0018034
NCU07724	50.7786	25.7873	-0.887919	1.38227e-07	6.36725e-07
NCU04469	10.218	5.3625	-0.884921	1.67765e-05	5.72516e-05
NCU05492	3.64112	1.46998	-0.884758	0.0405556	0.0694255
NCU06550	487.951	249.835	-0.884741	2.62678e-08	1.30735e-07
NCU03142	7.80451	3.90686	-0.884252	0.000947203	0.00236431
NCU04914	3.71441	1.79729	-0.88424	0.063999	0.103606
NCU00155	7.11412	3.69215	-0.882769	0.000841636	0.00212896
NCU02977	72.2413	36.7684	-0.882531	3.74168e-09	2.07086e-08
NCU04830	22.8901	11.8332	-0.882525	4.62218e-07	1.9932e-06
NCU00282	4.17433	2.05938	-0.881254	0.00301107	0.00679685
NCU07178	58.6155	29.2333	-0.881028	1.43968e-06	5.76263e-06
NCU16968	7.65451	3.98673	-0.881015	0.00409193	0.00895649
NCU17116	70.471	36.3448	-0.880055	1.14726e-06	4.67866e-06
NCU05430	902.345	463.64	-0.879996	4.94338e-11	3.35685e-10
NCU02016	165.791	83.8903	-0.879393	6.509e-09	3.49984e-08
NCU01911	20.3395	10.5556	-0.878738	2.48701e-05	8.27618e-05
NCU04265	1.84369	1.54553	-0.878386	0.0112396	0.0222885
NCU09064	2.02782	1.14661	-0.878273	0.0223096	0.0410655
NCU01575	38.4522	19.8656	-0.876981	1.1734e-06	4.77205e-06
NCU09387	3.84349	2.04254	-0.875474	0.0482287	0.0810158
NCU04835	10.5216	5.23881	-0.874423	0.000814097	0.00206926
NCU09264	14.4313	8.86624	-0.873586	5.02751e-05	0.00015768
NCU09883	4.56191	2.28828	-0.873436	0.0069487	0.0144611
NCU03100	651.377	332.963	-0.872977	2.33147e-11	1.63603e-10
NCU04318	2.40794	1.19809	-0.871382	0.122153	0.182239
NCU01114	4.82592	2.36776	-0.870309	0.0572572	0.0940991
NCU02245	5.53124	2.75911	-0.868734	0.000572608	0.00149946
NCU04768	33.4243	17.9004	-0.866687	2.79034e-06	1.07538e-05
NCU06314	10.4619	5.17815	-0.865113	0.00120419	0.00294879
NCU01276	20.6032	10.5594	-0.864676	0.000663476	0.00171243
NCU01894	87.4032	46.1022	-0.864595	2.34299e-06	9.12527e-06
NCU04767	13.0228	6.49641	-0.863028	6.98827e-06	2.53652e-05
NCU00644	129.471	67.6063	-0.862594	1.86869e-10	1.18889e-09
NCU00041	123.098	63.579	-0.861659	2.94156e-09	1.6466e-08
NCU06691	42.3053	21.7423	-0.861416	6.89581e-07	2.90722e-06
NCU02636	20.9677	10.6562	-0.859844	0.00032397	0.000885206
NCU08934	10.6431	5.76635	-0.859714	8.80377e-05	0.000266028
NCU04247	29.8797	15.3102	-0.859696	9.81648e-06	3.48103e-05
NCU03229	54.5494	28.5917	-0.859501	7.93054e-07	3.32252e-06
NCU06596	20.5392	9.32393	-0.858444	7.14492e-06	2.5921e-05
NCU16559	14.4665	7.23179	-0.858235	0.000827946	0.00209794
NCU06441	30.4735	15.3128	-0.857344	1.41766e-06	5.68067e-06
NCU06446	17.9357	9.07414	-0.857247	0.000301462	0.000829555
NCU08057	9.37787	4.77395	-0.857119	0.0251648	0.0456701
NCU09121	46.2189	24.0242	-0.857063	7.88332e-09	4.19199e-08
NCU08779	55.9087	29.2144	-0.856572	9.65847e-08	4.52841e-07
NCU03795	56.8988	29.9749	-0.856514	5.94579e-07	2.52842e-06
NCU02133	315.065	162.503	-0.856104	8.90101e-12	6.52593e-11
NCU01920	9.14615	2.89834	-0.854442	0.00175281	0.00417015
NCU02784	83.1885	43.5915	-0.85403	8.88032e-07	3.68686e-06
NCU04117	8.88766	4.66858	-0.853861	0.000842132	0.00212949
NCU08280	165.803	85.8	-0.853486	7.46344e-07	3.13754e-06
NCU00663	21.89	11.1131	-0.852511	0.000514102	0.0013559
NCU07380	156.42	82.9437	-0.851886	0.000214363	0.000603643
NCU09002	190.163	97.3229	-0.850988	2.12514e-09	1.21359e-08
NCU04415	78.1409	41.4237	-0.850727	0.000430947	0.00115311
NCU05971	26.2249	13.4869	-0.849709	0.000126819	0.000372288
NCU03561	71.3235	37.416	-0.849565	0.000172496	0.000494256
NCU02577	26.2485	13.5176	-0.847569	0.000128069	0.000375732
NCU07697	183.889	97.0367	-0.847372	2.62219e-08	1.30595e-07
NCU00978	10.9058	5.66645	-0.846602	3.78849e-05	0.000121618
NCU01895	17.4574	9.14848	-0.846304	1.80477e-07	8.23613e-07
NCU00287	9.70699	4.9956	-0.845286	0.000517841	0.00136478
NCU07398	1.50332	0.68754	-0.844665	0.0675801	0.1089
NCU05983	13.958	6.8578	-0.844584	0.00533266	0.0114309
NCU03397	23.8297	12.695	-0.844338	0.000529414	0.00139279
NCU06065	4.03421	3.15639	-0.843363	0.0115966	0.0229346
NCU16762	0.314617	0.195297	-0.843236	0.0683517	0.109983
NCU01788	8.0956	4.2826	-0.842968	0.00151692	0.00364784
NCU01698	64.8383	34.5078	-0.841131	5.3673e-08	2.58734e-07
NCU00413	2415.95	1260.96	-0.840813	2.16952e-13	1.8505e-12
NCU07739	28.2789	14.8029	-0.840443	1.71049e-06	6.77297e-06
NCU08003	38.4899	20.1962	-0.84028	1.82646e-05	6.20136e-05
NCU05664	27.076	13.8978	-0.840102	2.95781e-07	1.30923e-06
NCU08898	31.5791	15.9744	-0.839421	1.65598e-05	5.65644e-05
NCU00471	4.89581	2.66577	-0.838688	0.042375	0.0721375
NCU06367	26.2103	14.0031	-0.838356	0.00261744	0.00597797
NCU03405	7.67351	4.10252	-0.837531	0.0776516	0.122897
NCU10806	17.2041	9.11964	-0.83744	2.82476e-05	9.27846e-05
NCU05343	3.79284	2.0517	-0.835457	0.0116326	0.0229996
NCU03749	63.2168	32.5499	-0.831885	8.47148e-07	3.52707e-06
NCU00166	0.415213	0.136504	-0.831786	0.145524	0.211634
NCU06741	326.59	175.229	-0.830743	1.2687e-05	4.40305e-05
NCU01156	2.21727	1.19928	-0.829607	0.0760145	0.120825
NCU07506	61.5233	31.4218	-0.829191	6.9099e-06	2.51427e-05
NCU09699	18.1897	9.67492	-0.828329	7.01463e-05	0.000215968
NCU07165	42.218	22.0399	-0.82746	1.07758e-06	4.40671e-06
NCU04761	21.1356	11.2007	-0.82628	7.48789e-05	0.000229469
NCU12046	18.8193	9.93047	-0.825683	0.000429513	0.00114969
NCU02584	1.30359	0.699474	-0.825032	0.174077	0.246704
NCU09767	1.14138	0.600771	-0.8249	0.276623	0.365897
NCU04554	32.356	10.9119	-0.823671	2.22258e-10	1.40313e-09
NCU06394	24.7633	13.4515	-0.823514	0.000140343	0.00040946
NCU06077	1.80448	0.996728	-0.823274	0.0961215	0.147899
NCU02474	38.1128	19.5782	-0.822938	0.000793703	0.00202091
NCU05168	37.3958	20.319	-0.822774	5.76886e-06	2.12111e-05
NCU09132	236.841	125.342	-0.8227	9.46058e-12	6.91552e-11
NCU03863	2.75955	1.41436	-0.822168	0.0686752	0.110472
NCU08931	39.7951	20.682	-0.820041	8.1405e-05	0.000247715
NCU01252	5.55746	2.98785	-0.819635	0.00260355	0.00594993
NCU02175	26.7466	14.2478	-0.816649	1.31517e-06	5.30754e-06
NCU06703	22.117	11.647	-0.816346	4.83543e-06	1.79857e-05
NCU08188	2.76009	1.62591	-0.816275	0.247158	0.331873
NCU09124	12.7163	6.69868	-0.815564	0.00170578	0.00406745
NCU02310	17.6847	9.24544	-0.815026	7.37524e-05	0.000226205
NCU00101	25.1851	13.2234	-0.814385	3.57653e-05	0.000115471
NCU00585	74.3983	39.9733	-0.813363	4.3827e-07	1.89883e-06
NCU03966	4.10015	2.20217	-0.812998	0.0283946	0.0508547
NCU05028	12.0989	6.42633	-0.811264	4.49219e-05	0.000142407
NCU11323	158.114	85.1396	-0.81085	7.78398e-05	0.000238047
NCU07273	8.54042	4.26994	-0.809606	0.0593459	0.0970983
NCU03634	122.11	32.8248	-0.809571	1.2849e-09	7.53637e-09
NCU00431	116.16	62.7431	-0.808723	2.72002e-06	1.04938e-05
NCU10397	19.3616	10.5552	-0.808562	0.00304754	0.00686863
NCU02955	37.2562	19.8996	-0.807794	2.70037e-06	1.04234e-05
NCU04604	14.2947	7.68533	-0.806249	0.000123866	0.000364567
NCU01362	14.9668	8.06354	-0.806179	1.17986e-05	4.11608e-05
NCU04207	3.34926	1.57682	-0.805691	0.0260377	0.0471034
NCU00395	42.3595	23.0829	-0.805058	8.45672e-07	3.52491e-06
NCU05248	34.7591	18.6448	-0.804975	2.65685e-06	1.02716e-05
NCU14164	2.9473	1.31386	-0.804033	0.121429	0.181379
NCU01656	6.96476	4.08795	-0.803028	0.00177953	0.00422415
NCU05989	224.363	120.811	-0.802311	2.6234e-12	2.03058e-11
NCU04930	46.1389	24.8203	-0.80118	0.133759	0.197077
NCU17100	795.666	421.349	-0.800584	6.63608e-07	2.81222e-06
NCU07293	9.794	5.19626	-0.799766	0.000830432	0.00210279
NCU09600	61.2225	32.2446	-0.799086	2.66412e-06	1.02943e-05
NCU04516	47.6844	25.9394	-0.798858	1.07113e-08	5.61981e-08
NCU00015	16.9531	8.05547	-0.797668	0.000882985	0.00222286
NCU07885	8.15961	4.53882	-0.796799	0.00943387	0.0190829
NCU01940	47.5893	25.4665	-0.79668	1.43512e-08	7.38738e-08
NCU03528	19.9719	10.2628	-0.79666	0.00115166	0.00282673
NCU04726	2.03747	1.11126	-0.795617	0.0563247	0.0927322
NCU02727	27.9461	11.7446	-0.795463	3.06096e-06	1.17292e-05
NCU01989	17.3857	9.27783	-0.793797	0.00207825	0.00485496
NCU01097	10.9435	5.96319	-0.793745	0.000631827	0.00163936
NCU01984	10.6503	5.59498	-0.793559	0.000341017	0.000926625
NCU03290	52.6076	28.3589	-0.792058	6.00147e-08	2.87609e-07
NCU04106	9.36109	5.10669	-0.791241	0.00889204	0.0181063
NCU04132	2.04672	1.08861	-0.790854	0.183121	0.257598
NCU08669	83.735	45.7751	-0.789163	3.02914e-09	1.69434e-08
NCU01085	7.04234	3.81732	-0.789097	0.00697043	0.0144983
NCU00605	17.9826	10.1405	-0.786997	0.00645267	0.0135481
NCU00926	4.21909	2.14966	-0.785266	0.0364037	0.0632383
NCU03814	11.5564	6.27231	-0.785184	0.000292237	0.000805073
NCU01747	26.9538	14.92	-0.784864	8.51897e-05	0.000258271
NCU06598	4.43214	2.51905	-0.784629	0.00772338	0.0158715
NCU04036	58.445	30.1572	-0.784594	6.99962e-05	0.000215673
NCU02564	16.4439	8.26906	-0.783975	0.00119249	0.00292208
NCU05220	68.3722	38.206	-0.783859	0.000210696	0.000593774
NCU05648	3.39222	1.76805	-0.783127	0.0364575	0.0632784
NCU04001	31.1342	16.9349	-0.783058	5.20465e-06	1.92423e-05
NCU08809	26.077	14.3442	-0.782648	0.0021028	0.00490453
NCU05226	33.9463	18.2424	-0.780936	1.30907e-05	4.52609e-05
NCU08794	51.9723	28.4621	-0.780605	3.264e-08	1.61034e-07
NCU03299	12.0705	6.92196	-0.780576	0.00686649	0.0143143
NCU05448	3.76493	2.10798	-0.780327	0.197263	0.273942
NCU05921	6.42742	3.60727	-0.778975	0.0197945	0.0369627
NCU08297	153.278	83.5359	-0.778967	1.79662e-10	1.14502e-09
NCU01298	5.37932	2.79712	-0.778373	0.0523808	0.0871356
NCU02947	2.13219	1.18496	-0.778239	0.217306	0.297542
NCU04322	1.82394	0.973312	-0.778041	0.135578	0.199398
NCU02746	89.0203	48.7171	-0.777043	3.61768e-08	1.77295e-07
NCU04456	12.2856	6.60297	-0.776689	0.00188748	0.00445313
NCU09512	65.0944	35.6159	-0.776128	1.45127e-05	4.9873e-05
NCU05994	8.13836	4.41456	-0.775808	0.000491078	0.00129936
NCU05025	4.26783	2.48438	-0.775164	0.0788235	0.124457
NCU04590	9.73647	5.60503	-0.774175	0.00504163	0.0108513
NCU01512	20.2665	8.19088	-0.773694	6.22068e-05	0.000192721
NCU08480	17.9217	9.83303	-0.773539	0.000120496	0.000355073
NCU00147	42.2289	19.8887	-0.77277	0.00110802	0.00272782
NCU03601	6.76548	3.7347	-0.771869	0.00318191	0.00714741
NCU06907	13.0226	7.06671	-0.770952	0.000171812	0.000492679
NCU00444	30.3894	16.8427	-0.770939	3.6237e-05	0.00011694
NCU09030	7.44212	4.35056	-0.770756	0.00374864	0.00828641
NCU00478	2.57985	1.36446	-0.770098	0.0125929	0.0247125
NCU08053	56.7754	31.3782	-0.769929	0.000340318	0.000925066
NCU05488	231.212	130.694	-0.76944	2.58102e-09	1.45362e-08
NCU02092	3.58841	1.91359	-0.769212	0.0259097	0.0468834
NCU01317	1588.38	876.692	-0.767595	2.32352e-10	1.46433e-09
NCU08396	27.1073	14.8806	-0.767339	1.77979e-05	6.04849e-05
NCU06654	23.6771	12.6788	-0.766589	9.42717e-06	3.35558e-05
NCU16367	8.18666	4.52902	-0.766348	0.0293074	0.0522451
NCU08909	1296.27	699.491	-0.766192	0.0019893	0.00467088
NCU06990	2.01282	1.09899	-0.765706	0.0561854	0.0925859
NCU17155	3.69468	1.93392	-0.764702	0.0918024	0.142175
NCU09208	7.9743	4.74818	-0.763629	0.00182257	0.00431658
NCU17208	15.6088	7.9732	-0.763563	0.000197853	0.000560153
NCU06584	7.77215	4.30075	-0.762937	0.000592616	0.00154799
NCU03246	7.028	3.85946	-0.762639	0.00308834	0.00694995
NCU05221	149.626	83.3046	-0.761962	6.79457e-08	3.23511e-07
NCU01888	4.75631	2.71203	-0.761801	0.0118088	0.0233229
NCU05686	38.0417	20.7589	-0.76165	2.49324e-07	1.12044e-06
NCU09755	2.55541	1.1771	-0.761568	0.185545	0.260151
NCU09117	35.3617	19.4601	-0.760991	1.64222e-05	5.61206e-05
NCU05356	11.1418	5.74646	-0.760788	0.0550136	0.0908582
NCU00316	13.1709	7.57748	-0.759771	0.00392109	0.00863391
NCU06511	8.30087	4.50081	-0.759664	0.000275746	0.000763358
NCU08045	51.0321	29.3074	-0.759597	0.000166685	0.000479099
NCU02086	23.2234	12.8717	-0.759436	0.000221615	0.000622661
NCU02631	8.95121	5.23954	-0.759139	0.0132861	0.0259002
NCU03904	29.0114	15.6155	-0.75871	0.00279832	0.00635755
NCU01174	9.92347	5.30641	-0.758476	0.00344345	0.0076906
NCU06536	16.9762	9.58908	-0.75511	9.64097e-05	0.000289262
NCU08761	27.9076	15.7059	-0.755038	0.000112793	0.000333387
NCU07808	463.076	254.545	-0.754939	0.000189354	0.000537951
NCU02226	27.492	15.3274	-0.754468	0.000665602	0.00171671
NCU03725	69.7616	39.0322	-0.752764	1.20557e-08	6.2804e-08
NCU02707	1684.69	935.354	-0.751865	6.24965e-12	4.64684e-11
NCU02883	34.6019	19.1496	-0.751722	4.89032e-05	0.000153639
NCU16845	3.87356	2.08815	-0.751432	0.0355818	0.0619924
NCU08132	39.4423	22.041	-0.750016	1.85014e-09	1.06647e-08
NCU06760	38.9844	21.6127	-0.750009	2.6995e-05	8.90678e-05
NCU05546	1.51673	0.806907	-0.749918	0.140049	0.205114
NCU05239	3.14419	1.73629	-0.749022	0.0383717	0.0661485
NCU07787	155.862	85.3147	-0.748724	0.000330933	0.000902222
NCU05000	4.15303	2.27983	-0.746228	0.0172232	0.0327511
NCU07059	12.8132	7.23002	-0.746103	6.37143e-05	0.000196894
NCU07482	5.62028	2.99765	-0.744762	0.0286424	0.0512236
NCU16888	42.0454	23.5163	-0.74473	1.71808e-05	5.85498e-05
NCU04597	30.2024	16.8382	-0.74466	4.56207e-07	1.9719e-06
NCU02771	116.473	64.2769	-0.74394	1.10315e-07	5.14269e-07
NCU06273	18.6808	10.099	-0.743412	0.000822619	0.0020866
NCU01657	35.8509	20.2929	-0.742308	0.000525971	0.00138521
NCU00088	71.7595	40.6787	-0.741935	0.000114463	0.000337835
NCU03796	21.9322	12.2296	-0.741648	0.00039523	0.00106528
NCU01201	40.3748	22.306	-0.741121	0.000397615	0.00107053
NCU02397	58.6999	32.3345	-0.73978	2.31189e-05	7.72834e-05
NCU00536	35.2118	19.1469	-0.739268	2.12532e-05	7.13057e-05
NCU04457	10.229	5.79862	-0.738374	0.000202463	0.000572543
NCU03802	11.0314	6.24798	-0.738028	0.00639051	0.0134363
NCU01962	315.95	179.342	-0.737875	1.59582e-06	6.35652e-06
NCU07001	31.5159	17.279	-0.73771	4.71223e-05	0.00014887
NCU06566	11.869	6.45281	-0.736931	0.000361492	0.000979009
NCU09896	168.252	85.8585	-0.736924	7.31507e-09	3.9019e-08
NCU00241	17.8569	10.3105	-0.736472	0.000139922	0.000408555
NCU01007	52.8513	29.6226	-0.736447	0.000100914	0.000300862
NCU02271	5.83824	3.3812	-0.735961	0.0261542	0.0472792
NCU00484	139.429	78.132	-0.735178	9.61265e-07	3.96407e-06
NCU06619	506.636	286.838	-0.735166	4.98666e-08	2.40858e-07
NCU08981	8.90332	6.04586	-0.734625	0.00339357	0.00759735
NCU10020	31.4197	17.5309	-0.734302	1.97973e-05	6.66641e-05
NCU09817	114.027	64.7396	-0.733994	1.3067e-07	6.03425e-07
NCU07830	1697.31	945.45	-0.732702	9.95589e-10	5.88435e-09
NCU15719	2118.96	1197.61	-0.732698	1.29337e-05	4.47603e-05
NCU08992	21.386	12.2349	-0.73258	0.00370594	0.00820188
NCU06416	13.0485	7.49204	-0.73245	0.0196623	0.0367626
NCU03225	11.1592	6.2762	-0.731997	0.000313728	0.000859773
NCU09680	11.1424	6.32628	-0.731921	0.0230937	0.0423289
NCU01776	1385.52	773.004	-0.731839	1.2573e-11	9.03804e-11
NCU05083	1.9533	1.1022	-0.731626	0.266594	0.354287
NCU08110	25.3294	14.5341	-0.730995	0.000280136	0.000773764
NCU01036	51.0034	28.1959	-0.730876	4.32503e-07	1.87826e-06
NCU09401	5.29344	3.10292	-0.729034	0.00922892	0.0187146
NCU06220	24.3976	13.5024	-0.728999	0.000477423	0.00126642
NCU04847	76.3225	43.2829	-0.727995	8.1988e-07	3.42711e-06
NCU09477	4301.49	2409.84	-0.726566	3.79404e-11	2.60765e-10
NCU08225	10.1319	5.95951	-0.726125	0.00268336	0.00611524
NCU02043	13.0185	7.64091	-0.726059	0.00258022	0.00590578
NCU09562	12.0665	5.29672	-0.725054	0.0055225	0.0117864
NCU04813	11.9403	6.75087	-0.724847	0.00196829	0.00462619
NCU03191	39.9455	22.6218	-0.724642	0.000108184	0.000320847
NCU01821	77.4461	44.2768	-0.724326	1.25674e-06	5.08568e-06
NCU02451	31.3634	10.5987	-0.723696	0.000516286	0.00136117
NCU04601	1.46835	0.869161	-0.722725	0.107275	0.162913
NCU07287	1075.69	605.038	-0.722594	4.53424e-05	0.000143679
NCU02295	26.9558	14.8986	-0.722331	1.35155e-06	5.44244e-06
NCU03903	6.11501	3.57969	-0.722307	0.043079	0.0732343
NCU08552	58.964	34.7081	-0.722091	0.000167189	0.000480358
NCU08963	822.235	464.576	-0.721679	4.9053e-10	2.99154e-09
NCU02670	1.30823	0.212224	-0.719247	0.108832	0.164906
NCU07979	2.64933	1.47825	-0.719088	0.140145	0.205213
NCU00951	257.166	145.224	-0.719017	1.14824e-06	4.68004e-06
NCU16511	9.46977	4.59103	-0.717999	0.00127901	0.00311336
NCU16851	10.2333	5.96812	-0.715583	0.00745071	0.0153713
NCU01169	211.822	120.964	-0.715022	1.08054e-08	5.66516e-08
NCU06144	8.23937	4.73607	-0.713609	0.000789436	0.00201144
NCU03445	28.76	16.5166	-0.712764	0.000744743	0.00190813
NCU17088	4.61506	2.71931	-0.711877	0.0858779	0.134157
NCU01386	18.6084	10.2734	-0.710522	0.000726516	0.00186402
NCU08146	11.3809	7.41342	-0.710026	0.0205955	0.038245
NCU17101	1.94973	1.02767	-0.709131	0.105256	0.16018
NCU11263	16.6759	9.83618	-0.708651	0.000656145	0.00169529
NCU06852	0.492168	0.214662	-0.708394	0.188012	0.26286
NCU06949	13.539	7.69847	-0.708186	0.00377371	0.00833433
NCU05805	43.5082	24.5854	-0.707892	4.30596e-06	1.6155e-05
NCU17060	10.5503	6.30368	-0.70758	0.034614	0.0604637
NCU00378	34.8888	20.5674	-0.707349	0.000126844	0.000372288
NCU07283	41.5276	24.1642	-0.707335	0.000213159	0.000600482
NCU05458	4.47566	2.64669	-0.707315	0.00282929	0.00642393
NCU05801	2.7997	1.62087	-0.707314	0.0939777	0.145177
NCU04738	8.21213	4.76702	-0.705834	0.00098993	0.00246095
NCU03277	17.017	9.7391	-0.705401	0.00162734	0.00389431
NCU02356	8.7587	5.23009	-0.703406	0.000205267	0.000579582
NCU03439	30.1311	16.7591	-0.703163	0.000200436	0.000567029
NCU03243	8.73688	4.97491	-0.702654	0.0166189	0.0316922
NCU04902	3.09131	1.96802	-0.702613	0.168192	0.239286
NCU05273	31.0775	17.8701	-0.702429	3.74709e-05	0.000120342
NCU03668	10.2578	5.98488	-0.701014	0.000969955	0.00241782
NCU01193	31.4874	17.9357	-0.700957	0.000282708	0.000780575
NCU01564	23.7378	14.0648	-0.7007	0.000485308	0.00128548
NCU08217	30.0585	17.5184	-0.700511	0.000155682	0.000450478
NCU08024	39.3165	22.6229	-0.699509	2.92801e-05	9.5962e-05
NCU01391	326.187	206.274	-0.699324	1.2772e-05	4.4284e-05
NCU06247	76.9431	44.4229	-0.699291	2.10156e-08	1.06029e-07
NCU03915	16.7514	9.64345	-0.697994	3.74544e-05	0.000120341
NCU03222	126.513	73.6673	-0.697902	5.58613e-06	2.05701e-05
NCU06970	77.9099	44.0007	-0.697741	3.51669e-06	1.33229e-05
NCU05592	23.4748	13.6322	-0.697682	0.000735629	0.00188543
NCU08619	2.65968	0.418529	-0.6976	0.0829638	0.130074
NCU07412	5.93034	3.44442	-0.696537	0.000632974	0.00164173
NCU00492	33.2716	19.2526	-0.696429	1.25263e-06	5.07182e-06
NCU06790	73.9346	42.0723	-0.696127	2.79214e-05	9.18362e-05
NCU00891	26.2797	15.5952	-0.695561	0.000598334	0.00156016
NCU09561	14.7003	8.92437	-0.695352	0.00226373	0.00525657
NCU07805	1.93255	1.24611	-0.695223	0.212435	0.291725
NCU02630	13.8372	7.93229	-0.695072	0.001532	0.0036817
NCU06928	13.1876	7.70664	-0.694524	0.000362636	0.000981744
NCU01490	2.94281	1.69118	-0.693996	0.140841	0.206069
NCU07563	2.91801	1.66228	-0.693678	0.145665	0.211696
NCU01589	98.9969	57.5427	-0.692997	0.000125729	0.000369902
NCU02075	653.964	379.97	-0.692757	8.42022e-08	3.96807e-07
NCU16668	1.04749	0.526416	-0.692587	0.226244	0.307834
NCU03703	1246.09	725.116	-0.692044	1.1623e-10	7.57811e-10
NCU11415	6.6491	3.10332	-0.690903	0.0173475	0.0329365
NCU01551	23.0681	13.6093	-0.690795	0.00552963	0.0117981
NCU02751	2.73173	1.70514	-0.690503	0.0595943	0.0973748
NCU04636	65.0558	37.6921	-0.690449	2.71041e-05	8.93476e-05
NCU02770	10.0933	5.82177	-0.689983	0.00065574	0.00169484
NCU06243	14.5685	8.60011	-0.689959	0.00637594	0.0134095
NCU09504	8.39345	4.66085	-0.689569	0.00932816	0.0188846
NCU01998	8.41122	4.71145	-0.687492	0.0124185	0.0244092
NCU01900	3.24827	1.93157	-0.687171	0.217192	0.297441
NCU16818	5.38601	3.24437	-0.686708	0.146752	0.212814
NCU04729	1.27948	0.794479	-0.686023	0.207258	0.285805
NCU03129	18.5096	11.2201	-0.685797	0.00260227	0.00594885
NCU07417	28.8259	16.612	-0.68434	0.000107097	0.000318007
NCU06419	72.4573	42.3468	-0.684071	2.43432e-07	1.09663e-06
NCU11322	9.38613	5.35565	-0.68388	0.0160023	0.0306513
NCU08940	249.013	145.338	-0.683284	1.21881e-07	5.64968e-07
NCU00935	88.9623	52.8352	-0.682813	2.49833e-05	8.31008e-05
NCU00388	24.778	14.4781	-0.682161	3.83357e-06	1.44678e-05
NCU03134	1.33308	0.66877	-0.681736	0.311654	0.403375
NCU04990	7.2031	4.14118	-0.681522	0.00801944	0.0164249
NCU01300	39.8307	23.3929	-0.679432	0.00257255	0.00589366
NCU09108	67.1751	39.1619	-0.678873	0.000196031	0.000555422
NCU16651	17.293	9.44606	-0.678608	0.0203938	0.0379376
NCU02934	4.45505	2.57369	-0.677847	0.0108614	0.0215966
NCU03358	29.5948	16.2227	-0.677045	0.00142177	0.00343926
NCU00505	117.312	68.7233	-0.676688	1.05693e-05	3.73145e-05
NCU01365	3.74887	1.74988	-0.675845	0.0207524	0.038517
NCU03678	35.2607	20.8289	-0.674922	3.93292e-06	1.48235e-05
NCU05635	12.1637	7.42398	-0.674851	0.00214049	0.00498928
NCU01947	7.30101	4.37342	-0.674636	0.00239417	0.00551941
NCU01455	32.6281	19.2214	-0.674513	4.38595e-05	0.0001394
NCU02530	27.5539	15.841	-0.674506	0.0079257	0.0162555
NCU16952	92.5002	58.1449	-0.673962	0.00015144	0.000439569
NCU11395	7.9195	4.79009	-0.673887	0.157453	0.22637
NCU01233	13.4774	7.7356	-0.673718	0.0984644	0.150874
NCU09422	171.613	100.973	-0.673544	2.99126e-06	1.148e-05
NCU08671	16.7097	9.89337	-0.673477	0.00156438	0.00375094
NCU04491	38.1953	22.1077	-0.673164	0.0775042	0.12269
NCU14153	31.6722	18.9042	-0.671803	0.00691991	0.0144095
NCU05225	37.1313	21.8637	-0.671701	0.000204062	0.000576623
NCU07535	11.7731	6.94362	-0.671601	0.00305619	0.00688391
NCU01666	136.56	77.4399	-0.671522	1.02093e-05	3.61302e-05
NCU06222	3.37212	2.0969	-0.67131	0.152361	0.219864
NCU00833	4.8539	2.84879	-0.670615	0.00199554	0.00468256
NCU09529	24.4517	14.1043	-0.670343	1.47685e-05	5.07048e-05
NCU08054	16.2274	9.87973	-0.670322	0.000526384	0.00138581
NCU04268	115.142	67.8337	-0.670309	5.8059e-06	2.13366e-05
NCU01175	139.06	81.8947	-0.669167	8.19768e-07	3.42711e-06
NCU01729	17.089	9.77967	-0.669108	0.000881797	0.00222063
NCU00660	30.6743	18.1513	-0.668185	0.000579158	0.00151499
NCU10476	26.4299	15.5164	-0.667909	0.000342892	0.000931032
NCU06638	5.4469	3.08995	-0.667729	0.0025033	0.00574581
NCU04950	4.51789	2.63674	-0.665425	0.212085	0.291315
NCU00712	42.4152	25.312	-0.665073	1.83535e-05	6.22867e-05
NCU02587	9.61711	5.66989	-0.664256	0.0451875	0.0765183
NCU03629	18.9944	11.0216	-0.663505	0.0192992	0.0361848
NCU03205	9.23969	5.20037	-0.663205	0.0383042	0.0661095
NCU04368	22.5427	13.8447	-0.66285	0.00244005	0.00560938
NCU09702	4.76622	2.95209	-0.662263	0.0795879	0.125503
NCU05511	3.98271	2.37683	-0.662089	0.0494042	0.082651
NCU06727	181.138	106.37	-0.661095	3.72116e-06	1.40541e-05
NCU01846	28.7351	16.7463	-0.659421	3.54061e-05	0.00011446
NCU02120	8.84199	5.19138	-0.658496	0.00149323	0.00359558
NCU00987	1.75932	0.751902	-0.658292	0.2614	0.34848
NCU04505	13.2622	7.50665	-0.658011	0.00182772	0.0043274
NCU06675	1.84407	0.959419	-0.65777	0.0774619	0.122649
NCU10291	3.35386	2.18993	-0.657493	0.122121	0.182239
NCU07933	27.7544	16.2108	-0.657037	0.00202256	0.00474445
NCU05892	0.311708	0.215812	-0.656639	0.183909	0.258365
NCU09258	8.72932	5.15368	-0.65544	0.00231762	0.00536648
NCU03210	8.96215	5.39103	-0.655307	0.0255998	0.0464024
NCU10011	32.1166	19.0866	-0.654637	0.000273279	0.000756812
NCU01554	8.11435	4.68084	-0.654042	0.00234917	0.00542417
NCU10933	16.2648	9.95738	-0.653932	0.00748421	0.0154317
NCU07473	14.7679	8.83716	-0.653067	0.00045361	0.00120717
NCU03807	37.4831	21.9036	-0.652057	0.00191531	0.00451299
NCU02159	18.4405	11.156	-0.651884	0.00366421	0.00811439
NCU04376	6.60183	3.99808	-0.651864	0.0765005	0.121414
NCU00681	8.19822	4.96383	-0.651739	0.00543459	0.0116325
NCU04749	5.58285	3.4488	-0.651128	0.0049468	0.0106628
NCU01728	3.75629	2.23163	-0.650924	0.0351266	0.0612719
NCU05982	11.8328	7.00041	-0.650784	0.0866954	0.135262
NCU04803	18.2455	11.2547	-0.650324	0.0215186	0.0397686
NCU03960	24.981	11.3062	-0.649365	0.00522654	0.0112165
NCU03957	26.1484	16.0558	-0.649078	0.00188813	0.00445322
NCU08504	23.2098	14.4367	-0.648842	0.00149499	0.00359863
NCU07817	273.197	165.473	-0.648231	0.0116905	0.0231078
NCU07276	3.49899	2.08315	-0.64819	0.0427245	0.0726819
NCU04552	1967.75	1180.97	-0.648034	5.49321e-07	2.3509e-06
NCU11345	92.5669	55.7817	-0.647618	1.18048e-06	4.79817e-06
NCU00564	78.2526	43.9817	-0.647137	0.00017751	0.000507045
NCU04076	5.01046	2.87833	-0.646945	0.0274592	0.0493408
NCU08293	10.0478	6.25379	-0.646181	0.0464421	0.0784264
NCU01673	11.0752	6.45436	-0.644916	0.0173279	0.0329249
NCU04644	43.1027	25.3524	-0.644753	0.00017937	0.000511959
NCU05561	2429.43	1452.89	-0.644377	3.65562e-05	0.000117815
NCU01944	5.75329	3.41723	-0.644274	0.0199093	0.0371678
NCU08597	9.67671	5.79387	-0.644133	0.000422499	0.00113215
NCU07816	4.32975	2.4495	-0.64388	0.0518592	0.0863265
NCU00914	17.8245	11.1424	-0.643516	0.000228415	0.000640274
NCU06908	8.09416	4.8375	-0.642934	0.00264918	0.00604296
NCU02018	20.7016	11.2541	-0.642375	0.00569608	0.0121112
NCU03364	23.8247	14.0033	-0.640172	7.17939e-05	0.000220658
NCU06778	11.1472	4.33076	-0.639058	0.00340674	0.00762219
NCU07264	32.6123	19.8495	-0.63879	0.00336924	0.00754517
NCU11411	5.32482	3.53512	-0.638778	0.0868673	0.135473
NCU03790	7.9669	4.74183	-0.638257	0.0189572	0.035607
NCU08448	8.25947	4.82674	-0.638041	0.0316395	0.0558108
NCU05586	2.50562	1.29704	-0.638011	0.0968999	0.148972
NCU00927	11.6445	6.99301	-0.637955	0.000986033	0.00245209
NCU10264	2.38214	1.48482	-0.637675	0.0647204	0.104613
NCU02393	166.963	99.563	-0.637359	1.33775e-07	6.16991e-07
NCU05183	11.9691	7.34135	-0.636771	0.00124031	0.0030342
NCU04221	109.057	65.7509	-0.634883	6.3228e-07	2.68254e-06
NCU08296	59.8399	35.8436	-0.634845	0.000189737	0.000538625
NCU04379	68.9431	41.6788	-0.634517	4.16468e-05	0.000132941
NCU09673	26.4233	15.8029	-0.634356	0.000236318	0.000660166
NCU05202	41.8374	24.8291	-0.633644	0.000110321	0.00032679
NCU03019	2.77254	1.8263	-0.631967	0.194715	0.270996
NCU05512	860.19	487.645	-0.631283	0.000409314	0.00110042
NCU10388	12.9112	6.88679	-0.630285	0.0103616	0.0207317
NCU06054	40.3414	23.9006	-0.630122	4.74218e-05	0.000149688
NCU09882	19.6136	11.7453	-0.62961	0.000614445	0.00159877
NCU03534	3.58365	2.12862	-0.629511	0.268834	0.356943
NCU06473	15.6989	9.31984	-0.62921	0.00364314	0.00807502
NCU04289	17.6221	10.5639	-0.62867	0.00078672	0.00200521
NCU03533	1.55083	0.987963	-0.628216	0.296517	0.387478
NCU02583	2.69127	1.51949	-0.627144	0.0866425	0.135208
NCU01322	12.5249	7.50428	-0.626452	0.0059097	0.012486
NCU07749	9.73546	8.27005	-0.625669	0.186521	0.261172
NCU01369	194.943	118.1	-0.625308	4.88942e-07	2.10351e-06
NCU01606	387.617	233.85	-0.625259	1.91103e-06	7.52253e-06
NCU02664	4.7038	2.85472	-0.625111	0.0636956	0.103138
NCU04473	70.1227	42.0619	-0.625083	8.19464e-05	0.000249156
NCU16821	36.6016	22.5388	-0.624242	0.00204961	0.0048033
NCU01833	8.86487	5.18992	-0.622562	0.000624881	0.00162249
NCU02095	19.9202	12.1136	-0.621846	0.0057579	0.0122179
NCU16833	44.3196	27.0198	-0.621323	0.0036453	0.00807738
NCU08762	114.1	69.9971	-0.621121	8.58842e-06	3.08287e-05
NCU04145	20.5963	12.5595	-0.621086	0.000770312	0.00196748
NCU16941	7.73504	4.53501	-0.62046	0.270967	0.359126
NCU16012	11.4879	7.06765	-0.620342	0.0388843	0.0668755
NCU06679	30.9436	18.9048	-0.620201	0.000215037	0.00060531
NCU00768	96.5762	59.4089	-0.620074	1.20496e-06	4.89229e-06
NCU00923	20.1674	12.3435	-0.620023	0.00285348	0.00647087
NCU06662	1.83364	1.07372	-0.617734	0.0495727	0.0828575
NCU07544	21.2236	13.3911	-0.616825	0.00343265	0.00767316
NCU03610	39.7177	24.3127	-0.616293	0.00022803	0.00063944
NCU03928	23.6969	14.54	-0.615275	0.000112634	0.000333238
NCU03164	5.46811	3.35068	-0.614355	0.00313805	0.00705318
NCU03155	187.722	114.944	-0.613697	1.01253e-06	4.16381e-06
NCU02201	5.55046	2.98193	-0.613247	0.0636471	0.103082
NCU06199	40.9067	25.3477	-0.61242	4.33878e-05	0.00013796
NCU05074	2.14684	1.29226	-0.612418	0.18851	0.263407
NCU01211	17.5838	10.8547	-0.612331	0.00171061	0.00407766
NCU02108	18.1175	11.9114	-0.61223	0.00838075	0.0171173
NCU01882	48.3295	29.8984	-0.611952	0.000277999	0.000768439
NCU00087	70.3883	43.6279	-0.611894	5.40353e-05	0.000168611
NCU02894	5.21311	3.33034	-0.611081	0.0893514	0.138817
NCU03690	30.1899	18.5717	-0.610683	3.04126e-05	9.94082e-05
NCU01975	45.5506	28.2042	-0.610561	0.000321885	0.000880162
NCU08034	26.34	14.2682	-0.610213	0.00271924	0.00618742
NCU11324	23.5116	13.6529	-0.610196	0.000156176	0.00045136
NCU02620	22.6909	14.219	-0.609776	0.00406953	0.00892072
NCU04903	1.36225	0.813088	-0.609363	0.331423	0.424057
NCU07747	119.827	71.8076	-0.60854	1.01682e-05	3.60021e-05
NCU10029	55.1954	30.9562	-0.607811	0.000440338	0.00117439
NCU04418	6.68379	4.09115	-0.607195	0.055293	0.0912787
NCU04160	23.7094	14.7112	-0.606829	0.000412203	0.00110738
NCU16432	3.19816	2.16121	-0.60674	0.113231	0.170728
NCU17057	4.9509	2.70925	-0.606361	0.146482	0.212577
NCU03768	19.85	11.74	-0.606324	0.00640076	0.0134505
NCU02013	82.0724	49.8146	-0.606059	0.000189478	0.000538098
NCU06282	3.19501	2.04195	-0.605614	0.253671	0.339332
NCU06978	7.02682	4.09951	-0.605477	0.105424	0.160402
NCU08317	6.97828	4.37459	-0.605288	0.0346522	0.0605161
NCU06706	11.4523	7.01809	-0.605127	0.0261011	0.0471948
NCU16385	15.6894	8.42131	-0.60485	0.172912	0.245331
NCU05290	79.6567	48.7429	-0.604751	0.00165446	0.00395021
NCU05426	18.0252	11.0763	-0.604413	0.00378719	0.00836159
NCU06270	33.0539	20.1306	-0.604178	0.000305416	0.000838557
NCU00364	16.8187	10.5736	-0.603999	0.00880171	0.0179323
NCU09900	14.4774	8.76044	-0.603538	0.0160607	0.0307472
NCU01814	26.8232	16.1182	-0.603462	0.000427418	0.0011445
NCU06210	837.636	516.83	-0.603416	2.81003e-06	1.0824e-05
NCU04189	26.6321	16.3499	-0.603339	5.42922e-05	0.000169269
NCU04315	9.11726	5.63757	-0.603114	0.00891526	0.01814
NCU05075	48.1529	28.5617	-0.603069	0.000810166	0.00206069
NCU03212	21.1229	13.0893	-0.603065	0.0027021	0.00615224
NCU06837	10.1411	6.14428	-0.602338	0.0600541	0.0980391
NCU09025	8.11547	5.28095	-0.602279	0.0215487	0.0398142
NCU07888	34.4314	20.7321	-0.602217	0.000983261	0.00244685
NCU00426	7.96423	4.42203	-0.6022	0.0792841	0.12505
NCU07359	13.0285	8.28821	-0.602131	0.00388656	0.00856813
NCU03080	32.5098	20.5955	-0.601669	0.00453741	0.00984958
NCU03094	32.7675	20.4956	-0.601062	0.0169371	0.0322488
NCU04946	100.034	62.0074	-0.600993	0.000144179	0.000420318
NCU01904	12.8016	6.96583	-0.600623	0.077304	0.122452
NCU01977	304.006	191.295	-0.599536	1.47769e-06	5.90836e-06
NCU01305	27.8974	16.9574	-0.599255	0.000492653	0.00130212
NCU01856	150.546	90.7292	-0.599003	0.0088286	0.0179821
NCU01932	12.3755	7.61264	-0.59798	0.0013852	0.00335521
NCU01466	6.97277	4.44344	-0.59774	0.0127972	0.0250665
NCU07743	6.01513	3.48022	-0.59772	0.0368322	0.0638535
NCU01823	8.2548	5.06302	-0.597507	0.000197368	0.000558994
NCU08676	96.7713	60.432	-0.596869	2.50447e-05	8.32674e-05
NCU07014	826.098	512.398	-0.596355	5.5804e-07	2.38268e-06
NCU05838	6.87085	4.28642	-0.596089	0.0708473	0.113717
NCU02468	57.3989	35.3608	-0.59498	0.00363726	0.00806441
NCU00666	4.39	2.79113	-0.594635	0.0828448	0.129943
NCU00622	17.3034	10.6985	-0.594174	0.000204625	0.00057799
NCU05417	4.87362	2.92456	-0.592154	0.0460484	0.0778508
NCU04824	6.01485	3.90646	-0.591998	0.0265816	0.0479928
NCU09035	2.56828	1.65965	-0.59087	0.294241	0.384981
NCU04335	29.8247	18.9153	-0.59032	0.000192362	0.000545657
NCU02952	17.4946	11.3075	-0.590299	0.00529515	0.0113538
NCU09017	19.4575	12.1094	-0.589648	0.000756697	0.00193539
NCU09760	10.5398	6.37201	-0.589594	0.0562299	0.0926384
NCU10012	13.43	8.20426	-0.5884	0.0224076	0.0412253
NCU01453	8.86038	4.97968	-0.587297	0.114192	0.172001
NCU06699	61.3518	38.1011	-0.586889	0.000158563	0.00045754
NCU00420	35.0717	21.8937	-0.586885	0.000519658	0.00136908
NCU04082	25.1374	15.5888	-0.586655	0.0800993	0.126228
NCU07678	25.3743	15.6973	-0.586567	0.00160873	0.00385448
NCU08705	8.40058	5.00602	-0.586163	0.0221034	0.0407368
NCU07571	4.76699	2.8152	-0.586002	0.212541	0.291778
NCU02573	27.282	17.138	-0.585986	0.00103342	0.00255883
NCU04580	10.7212	6.56828	-0.585895	0.0310503	0.0549162
NCU03384	3.56204	2.20381	-0.58515	0.169577	0.241116
NCU06174	17.0323	10.7553	-0.58258	0.00662095	0.0138693
NCU01412	33.6671	19.0739	-0.582387	0.000356512	0.000965877
NCU06348	37.8152	22.8581	-0.581196	0.00133654	0.0032416
NCU06614	4.74248	2.63916	-0.581026	0.112322	0.169461
NCU07173	54.6317	34.1078	-0.580449	2.77355e-05	9.12656e-05
NCU03091	20.6689	12.7987	-0.580391	0.00184551	0.00436529
NCU04136	17.2069	10.942	-0.579602	0.00292776	0.00662912
NCU09174	104.083	64.0314	-0.577921	0.023499	0.0429648
NCU04461	45.7609	29.7411	-0.57769	0.00205135	0.00480586
NCU00899	23.3231	14.4748	-0.577687	0.0092352	0.0187222
NCU03662	34.4641	21.7337	-0.577503	0.000833926	0.00211091
NCU02068	6.46345	4.20637	-0.577482	0.00790289	0.0162178
NCU06223	8.99049	5.80901	-0.577415	0.0328119	0.0576028
NCU08093	231.6	144.052	-0.577215	0.000144832	0.000421888
NCU10518	39.5577	24.9424	-0.576576	0.000157608	0.00045532
NCU00734	23.4978	14.2242	-0.57613	0.00357847	0.00794844
NCU10506	8.31398	5.27795	-0.576044	0.0280827	0.0503573
NCU01791	22.6677	14.7031	-0.575757	0.00292774	0.00662912
NCU02524	3.37616	2.15891	-0.57533	0.0556335	0.0917174
NCU07129	2.69615	1.83217	-0.575113	0.376785	0.471205
NCU01083	26.7085	16.6594	-0.57471	0.00182204	0.00431658
NCU10883	4.15797	2.68516	-0.574337	0.137004	0.201013
NCU02004	48.8542	30.5246	-0.574118	0.000345508	0.000937788
NCU07467	69.8444	40.591	-0.573611	0.00624782	0.0131589
NCU03297	176.529	112.824	-0.572414	5.27544e-05	0.000165034
NCU00678	3.99097	2.42456	-0.571663	0.238343	0.321562
NCU06354	83.5193	51.7801	-0.571305	0.000674913	0.00173951
NCU06999	21.0851	13.2841	-0.569669	0.000931874	0.00233157
NCU09325	17.7529	11.0085	-0.569189	0.00123878	0.00303147
NCU02509	1477.12	939.531	-0.568115	1.74034e-05	5.92262e-05
NCU00074	27.7266	17.4781	-0.567937	0.0040273	0.00883343
NCU03423	25.2097	16.0519	-0.567427	0.0221785	0.0408651
NCU03218	26.9872	16.9192	-0.567342	0.000841205	0.0021286
NCU02211	30.1543	18.7573	-0.567307	0.000288291	0.000794798
NCU06182	18.2932	11.597	-0.565901	0.000438458	0.0011698
NCU00542	34.3109	20.9734	-0.565565	0.00105146	0.002599
NCU03461	13.7441	8.73977	-0.565488	0.0073209	0.0151204
NCU05457	461.452	289.919	-0.564567	3.30171e-05	0.000107397
NCU06187	115.616	72.9946	-0.5635	0.000286047	0.000788907
NCU07023	16.2805	10.5151	-0.563497	0.0015501	0.00372034
NCU08860	31.5633	19.8358	-0.56348	0.0176496	0.0334326
NCU02525	3.06409	1.93462	-0.563336	0.0790909	0.124772
NCU06122	24.0576	15.9483	-0.562346	0.000289972	0.000799134
NCU09462	35.7575	16.2414	-0.561297	0.00407705	0.00893456
NCU06258	11.0422	7.02151	-0.561156	0.015445	0.0297403
NCU03882	90.5215	55.9894	-0.560647	0.000926762	0.00231958
NCU01765	163.95	104.958	-0.560428	7.86248e-05	0.000240049
NCU07206	2.14142	1.421	-0.559559	0.230586	0.312701
NCU01135	2.46833	1.68522	-0.558978	0.210734	0.289783
NCU04645	75.0171	48.4572	-0.558428	0.000164102	0.000472226
NCU00368	5.33432	3.71912	-0.558246	0.0789605	0.12462
NCU03880	53.7783	33.998	-0.558052	7.42532e-05	0.000227646
NCU03339	100.901	65.3181	-0.557605	8.14743e-05	0.000247823
NCU04251	31.2679	20.2165	-0.557482	0.000936093	0.00233976
NCU08380	46.9311	30.067	-0.555669	8.63595e-05	0.000261602
NCU05817	6.48383	3.63356	-0.554679	0.082431	0.129412
NCU01634	1490.24	950.667	-0.554212	4.56546e-05	0.000144606
NCU10002	4.39153	2.84457	-0.554156	0.0562749	0.0926917
NCU07078	1.97815	1.29849	-0.554043	0.38355	0.47796
NCU03278	7.68203	4.7813	-0.553976	0.0472453	0.0796183
NCU02534	127.456	81.9322	-0.553969	0.000159994	0.000460946
NCU06774	11.5256	7.40843	-0.553333	0.00809224	0.0165648
NCU04258	22.9677	14.5511	-0.552441	3.64832e-05	0.000117631
NCU00489	1108.65	709.352	-0.552428	2.61136e-07	1.17137e-06
NCU02599	92.0301	59.0745	-0.551844	0.00012184	0.000358745
NCU07492	7.9244	4.99411	-0.551352	0.0135466	0.0263661
NCU09705	6.15719	3.14306	-0.549864	0.158042	0.227083
NCU01872	0.199449	0.206735	-0.549695	0.111985	0.169022
NCU06190	6.59861	4.30596	-0.549645	0.00541227	0.0115948
NCU00278	37.6533	24.8476	-0.548487	0.00228162	0.00529144
NCU01930	40.2725	23.9817	-0.548234	0.00240426	0.00553889
NCU02314	0.822798	0.512615	-0.547987	0.343601	0.436981
NCU06757	7.20097	4.60226	-0.547804	0.10073	0.153896
NCU03291	5.20797	3.20521	-0.546937	0.0446352	0.0756352
NCU01840	5.24121	3.42885	-0.546407	0.0348418	0.0608327
NCU00220	12.8994	8.05293	-0.546319	0.0542118	0.0896951
NCU06857	2.46685	1.68374	-0.546076	0.183955	0.258365
NCU01504	89.4417	56.8693	-0.545736	9.11111e-05	0.000274302
NCU10687	13.2067	8.72306	-0.545509	0.0134002	0.0260949
NCU00167	17.3448	11.2618	-0.545472	0.0106202	0.0211741
NCU07587	13.1921	8.35868	-0.544612	0.00983852	0.0197981
NCU05926	8.86822	5.67982	-0.543943	0.00427502	0.00932122
NCU16889	2.13506	1.50119	-0.543819	0.352835	0.446949
NCU08936	1281.14	816.595	-0.543188	0.000907616	0.00227786
NCU00668	23.2116	14.8728	-0.542629	0.00043469	0.00116228
NCU02272	10.6776	6.73155	-0.542602	0.0101938	0.0204182
NCU01440	30.5989	19.5295	-0.54225	1.16405e-05	4.07058e-05
NCU02943	47.3464	30.5026	-0.54211	0.000152309	0.000441571
NCU06980	5.71302	3.79218	-0.542107	0.0527322	0.0876409
NCU02601	6.87497	4.43938	-0.541775	0.121085	0.180939
NCU08990	2493.34	1610.23	-0.541585	5.22801e-06	1.9319e-05
NCU03840	5.10798	3.26249	-0.541564	0.0767769	0.121801
NCU01390	81.3311	48.1882	-0.541525	0.000923385	0.00231192
NCU03072	7.25118	4.64683	-0.541377	0.0220835	0.0407206
NCU02182	13.1606	8.47569	-0.541362	0.00545258	0.0116642
NCU00152	11.2879	7.39284	-0.54099	0.00232918	0.00538814
NCU06521	8.56808	5.76952	-0.54098	0.0554865	0.0915571
NCU00893	4.98861	2.30986	-0.540766	0.0243973	0.0443976
NCU02656	1.48854	0.932512	-0.540391	0.261419	0.34848
NCU05360	18.4062	11.9396	-0.539723	0.000913937	0.00229216
NCU07859	148.695	96.4894	-0.539639	0.000556596	0.00146064
NCU05891	11.6301	7.58755	-0.539596	0.00167609	0.00399796
NCU07265	12.0831	8.47153	-0.539232	0.0573099	0.0941647
NCU05757	9.81219	6.3083	-0.538995	0.0913823	0.141644
NCU06958	53.0418	33.7144	-0.538934	0.000608158	0.00158409
NCU08120	70.0154	45.4206	-0.538087	0.00251505	0.00576738
NCU07829	1761.63	1142.2	-0.536866	1.87731e-05	6.35372e-05
NCU00792	107.495	68.3952	-0.536229	0.00563994	0.0120091
NCU09309	123.064	80.4491	-0.536213	0.000404387	0.00108837
NCU06975	18.627	12.0797	-0.535975	0.00770717	0.0158426
NCU04602	16.9477	11.3005	-0.535747	0.0413368	0.0706151
NCU05716	31.201	20.2664	-0.534237	0.00284386	0.00645304
NCU00406	51.2138	33.7577	-0.533514	8.39232e-05	0.000254851
NCU03846	13.875	9.25798	-0.533144	0.019335	0.0362426
NCU07408	1231.92	796.952	-0.532812	9.7189e-06	3.45274e-05
NCU08454	3.15189	1.89496	-0.531966	0.290193	0.380429
NCU04331	1209.75	783.97	-0.531464	6.82302e-06	2.48389e-05
NCU07404	3.44644	2.25226	-0.52939	0.0678105	0.1092
NCU10907	22.2546	14.2912	-0.529249	0.00580669	0.0122931
NCU00344	10.8307	7.06927	-0.529228	0.0632582	0.102542
NCU00066	16.0476	10.4198	-0.529139	0.00374483	0.00828048
NCU03102	1319.37	863.188	-0.529098	1.88087e-06	7.40773e-06
NCU02754	87.1127	56.7055	-0.528046	0.000303143	0.000833871
NCU09013	35.4469	19.4233	-0.527618	0.00928104	0.0188048
NCU03171	13.4355	8.8656	-0.526825	0.00573863	0.012184
NCU02758	49.4377	31.726	-0.526776	0.00105435	0.00260527
NCU01763	8.98421	6.21469	-0.526606	0.0941432	0.145402
NCU01414	76.5065	50.0379	-0.526605	0.000105404	0.00031336
NCU08027	25.2752	16.5567	-0.526605	0.0010888	0.00268229
NCU01467	240.43	152.714	-0.526544	0.0010969	0.00270133
NCU02514	591.057	386.402	-0.526071	4.96077e-06	1.84332e-05
NCU06311	36.8027	24.0677	-0.525561	0.0138003	0.0268244
NCU09547	12.1211	6.81478	-0.525534	0.0154459	0.0297403
NCU07984	17.2923	11.4844	-0.523812	0.00812125	0.0166195
NCU04352	40.0376	25.3936	-0.523454	2.86961e-05	9.4174e-05
NCU09291	42.7154	27.8002	-0.523439	0.00239031	0.00551225
NCU04095	4.5426	2.86507	-0.523147	0.0735567	0.117375
NCU04266	113.027	73.7357	-0.521971	0.0176485	0.0334326
NCU04244	62.654	41.0714	-0.52167	0.000272596	0.000755488
NCU08362	62.7431	40.8075	-0.521623	0.00131979	0.00320626
NCU02945	16.7485	10.8871	-0.521469	0.00953106	0.0192531
NCU00283	10.6547	6.79665	-0.520695	0.0548199	0.0906122
NCU08609	11.1219	7.65184	-0.520572	0.0251412	0.0456385
NCU02996	12.1483	8.11673	-0.520124	0.0144284	0.0279273
NCU04788	9.1534	2.54861	-0.519542	0.0714464	0.114579
NCU03148	733.127	474.534	-0.519029	6.28803e-06	2.29822e-05
NCU00466	17.6566	11.2071	-0.518649	0.00578976	0.0122643
NCU01584	8.20705	5.17635	-0.518224	0.0172959	0.0328809
NCU07742	9.17742	6.14359	-0.518102	0.0797064	0.125663
NCU11370	16.3768	10.4501	-0.517495	0.0608826	0.0991716
NCU01807	41.4567	26.552	-0.5174	0.00390868	0.00860915
NCU08357	22.6528	14.9096	-0.516962	0.0204386	0.0379896
NCU07191	28.6598	18.8668	-0.516849	0.00127789	0.0031127
NCU06038	62.4189	43.8548	-0.516445	0.00302125	0.00681563
NCU04553	1662.27	1067.55	-0.514961	0.000102354	0.00030466
NCU09112	5.15782	3.42964	-0.514875	0.0477974	0.0804382
NCU06652	203.406	132.181	-0.514062	9.09305e-06	3.24922e-05
NCU00810	4.02332	2.55199	-0.51338	0.136164	0.2001
NCU01013	29.8331	19.8319	-0.51215	0.00752015	0.0154972
NCU05644	40.7078	27.0125	-0.512128	0.00222438	0.005175
NCU03708	6.03536	3.72685	-0.511871	0.0643241	0.104064
NCU06050	3.92461	2.52607	-0.511538	0.0713141	0.114392
NCU06149	15.7613	10.3974	-0.511027	0.00931947	0.0188722
NCU11338	778.457	504.951	-0.510949	0.00585298	0.0123839
NCU02795	4.12607	2.77316	-0.510637	0.2105	0.289517
NCU01306	8.45732	4.55403	-0.510263	0.0461834	0.0780253
NCU15832	30.4747	19.856	-0.509984	0.00101792	0.00252372
NCU06360	54.7972	35.9086	-0.5099	0.000728515	0.0018685
NCU02161	9.71213	5.80971	-0.509685	0.00949197	0.0191793
NCU08370	9.65592	6.20809	-0.509408	0.0372895	0.0645399
NCU07192	111.964	73.0528	-0.508991	0.001436	0.00347255
NCU09733	6.3226	4.15529	-0.508864	0.0296239	0.0527128
NCU01119	15.7697	10.3726	-0.508853	0.0113825	0.0225596
NCU08720	9.13284	6.29134	-0.50879	0.23588	0.318882
NCU04718	75.0642	49.11	-0.508148	0.00107583	0.00265375
NCU05062	33.763	22.0042	-0.508129	0.007139	0.0147904
NCU00173	31.5717	19.6569	-0.508116	0.00664231	0.0139022
NCU07990	1.68121	1.23405	-0.507405	0.0982114	0.150611
NCU04175	59.1763	39.3778	-0.507266	0.00111045	0.00273196
NCU01342	92.9323	61.1109	-0.50718	0.0019295	0.00454411
NCU08279	7.60099	5.09984	-0.507113	0.0376547	0.0651107
NCU08502	1564.1	1123.93	-0.506603	0.00207	0.00484031
NCU08283	18.8251	12.7353	-0.506533	0.00124311	0.00303803
NCU00671	13.1509	8.56568	-0.506395	0.000264925	0.00073617
NCU04319	9.30515	6.13393	-0.506371	0.0305925	0.0541586
NCU00657	11.2075	7.54086	-0.505728	0.0285121	0.0510278
NCU04862	4.2724	2.66527	-0.505313	0.14317	0.208853
NCU04323	44.1431	29.7126	-0.505221	0.0231205	0.0423674
NCU07262	8.01365	4.94915	-0.504312	0.0472202	0.0795942
NCU01668	12.6637	8.4317	-0.504152	0.017113	0.0325585
[truncated: 5,362 more rows]
