# Supplementary material for: The nutrient-sensing GCN2 signaling pathway is essential for circadian clock function by regulating histone acetylation under amino acid starvation
Source: eLife journal article supplement (doi:10.7554/elife.85241), 2023-04-21
Supplement: fig7-data3 [file Figure 7-source data 3.xlsx]

## Sheet: frq
Hrs in DD	WT	WT	WT	cpc-1KO	cpc-1KO	cpc-1KO
6	1	1	1	1.16214	1.58203	1.25947
12	1.38922	2.33603	1.80173	1.22792	1.77715	1.44341
18	6.23065	8.77344	5.97249	1.51487	2.4792	1.8453
24	3.01136	4.74111	1.61565	1.83558	2.23135	2.26631
30	1.69325	2.15674	1.84918	1.62558	2.27383	1.78056
36	1.86	3.09815	2.15577	1.18903	1.86523	1.39044

## Sheet: his-3
Hrs in DD	WT	WT	WT	cpc-1KO	cpc-1KO	cpc-1KO
6	1	1	1	0.509905	0.464317	0.395561
12	1.12659	1.28504	1.21595	0.516591	0.423951	0.497712
18	1.77819	1.25289	1.67346	0.528991	0.438014	0.462481
24	1.57694	1.32247	1.33687	0.384588	0.422507	0.414798
30	1.13759	1.14648	0.948566	0.52619	0.354492	0.347172
36	1.1954	1.1259	0.985514	0.510767	0.463607	0.441929

## Sheet: arg-1
Hrs in DD	WT	WT	WT	cpc-1KO	cpc-1KO	cpc-1KO
6	1	1	1	0.303026	0.282171	0.25926
12	0.996261	1.09454	0.927958	0.208205	0.204992	0.214838
18	1.30574	1.17615	1.22348	0.227243	0.239441	0.225837
24	1.08178	1.12118	0.811997	0.208674	0.239266	0.19882
30	0.828351	0.848454	0.893227	0.185654	0.205485	0.165816
36	0.685843	0.82322	0.612658	0.186536	0.190765	0.272043

## Sheet: trp-3
Hrs in DD	WT	WT	WT	cpc-1KO	cpc-1KO	cpc-1KO
6	1	1	1	0.31719	0.646947	0.331036
12	1.1775	1.32797	1.3425	0.286931	0.559756	0.296867
18	1.3598	1.12719	1.56148	0.287249	0.490003	0.310558
24	1.34121	1.27346	1.19641	0.298511	0.580723	0.276175
30	1.0741	1.01715	0.824408	0.260499	0.514162	0.285096
36	0.969353	1.13196	0.983427	0.253909	0.66299	0.467961
