# Supplementary material for: The nutrient-sensing GCN2 signaling pathway is essential for circadian clock function by regulating histone acetylation under amino acid starvation
Source: eLife journal article supplement (doi:10.7554/elife.85241), 2023-04-21
Supplement: fig7-figsupp1-data1 [file Figure 7-figure supplement 1-source data 1.xlsx]

## Sheet: his-3
	WT	WT	WT	WT+3-AT	WT+3-AT	WT+3-AT	cpc-1ko	cpc-1ko	cpc-1ko
DD10	0.266	0.1788	0.1793	0.478	0.356	0.505	0.086	0.0603	0.066
DD14	0.287	0.236	0.373	0.476	0.364	0.525	0.101	0.051	0.057
DD18	0.313	0.238	0.233	0.463	0.336	0.496	0.0905	0.042	0.061
DD22	0.331	0.3201	0.344	0.451	0.497	0.529	0.079	0.062	0.081

## Sheet: trp-3
	WT	WT	WT	WT+3-AT	WT+3-AT	WT+3-AT	cpc-1ko	cpc-1ko	cpc-1ko
DD10	0.311	0.223	0.369	0.507	0.608	0.757	0.0712	0.058	0.073
DD14	0.331	0.284	0.451	0.569	0.509	0.717	0.066	0.041	0.069
DD18	0.337	0.295	0.282	0.755	0.459	0.675	0.062	0.037	0.066
DD22	0.356	0.399	0.391	0.679	0.729	0.75	0.061	0.056	0.083

## Sheet: ser-2
	WT	WT	WT	WT+3-AT	WT+3-AT	WT+3-AT	cpc-1ko	cpc-1ko	cpc-1ko
DD10	0.234	0.1703	0.315	0.6403	0.579	0.807	0.049	0.032	0.036
DD14	0.317	0.2595	0.337	0.647	0.563	0.739	0.061	0.033	0.066
DD18	0.379	0.254	0.261	0.769	0.537	0.743	0.056	0.028	0.037
DD22	0.354	0.3501	0.352	0.744	0.776	0.809	0.07	0.043	0.078
