# Supplementary material for: The nutrient-sensing GCN2 signaling pathway is essential for circadian clock function by regulating histone acetylation under amino acid starvation
Source: eLife journal article supplement (doi:10.7554/elife.85241), 2023-04-21
Supplement: fig7-figsupp1-data3 [file Figure 7-figure supplement 1-source data 3.xlsx]

## Sheet: frq
Hrs in DD	WT	WT	WT	cpc-1KO	cpc-1KO	cpc-1KO
6	1	1	1	1.1949	0.9185	0.5828
12	1.4734	1.5884	1.5656	1.7221	1.7167	1.7958
18	3.2163	3.0125	3.3536	2.1268	2.2274	2.3887
24	1.7779	1.8196	1.2976	2.2326	2.3633	2.6326
30	1.8691	2.0938	2.0464	2.9613	2.6521	2.7558
36	2.2639	2.5433	2.398	2.4176	1.8269	2.3505

## Sheet: his-3
Hrs in DD	WT	WT	WT	cpc-1KO	cpc-1KO	cpc-1KO
6	1	1	1	0.5368	0.6265	0.7388
12	0.5264	0.5346	0.6184	0.3524	0.3716	0.4275
18	1.0651	1.0173	1.1126	0.4139	0.3584	0.5767
24	0.8979	1.0935	1.0818	0.4355	0.4306	0.4919
30	0.7914	0.7959	1.0604	0.5671	0.536	0.5978
36	1.325	1.0719	1.064	0.432	0.4031	0.6188

## Sheet: arg-1
Hrs in DD	WT	WT	WT	cpc-1KO	cpc-1KO	cpc-1KO
6	1	1	1	0.410215	0.359166	0.257347
12	0.551957	0.617677	0.54491	0.314418	0.319732	0.319517
18	0.956811	1.047	0.995538	0.360496	0.337546	0.373756
24	0.868803	1.02702	0.968211	0.322605	0.336706	0.346527
30	0.703679	0.666573	0.77708	0.337852	0.306095	0.317744
36	0.985085	0.862714	0.946701	0.275565	0.287998	0.311469

## Sheet: ser-2
Hrs in DD	WT	WT	WT	cpc-1KO	cpc-1KO	cpc-1KO
6	1	1	1	0.4608	0.321	0.4783
12	0.6858	0.7273	0.5823	0.3573	0.3698	0.2918
18	1.4998	1.414	0.9253	0.358	0.3306	0.4208
24	1.6907	1.7096	1.2314	0.4149	0.3907	0.3611
30	0.765	0.709	0.9209	0.4403	0.4176	0.4536
36	1.2715	1.0316	1.1618	0.3418	0.2812	0.4057

## Sheet: trp-3
Hrs in DD	WT	WT	WT	cpc-1KO	cpc-1KO	cpc-1KO
6	1	1	1	0.3342	0.3283	0.3232
12	0.5699	0.5756	0.5465	0.2509	0.2686	0.2372
18	0.9797	1.0282	0.9016	0.2886	0.2714	0.3591
24	1.1613	1.1526	0.8447	0.2895	0.3169	0.3258
30	0.8038	0.923	1.0922	0.3683	0.3554	0.4261
36	1.152	0.948	0.996	0.246	0.276	0.389
