# Supplementary material for: The nutrient-sensing GCN2 signaling pathway is essential for circadian clock function by regulating histone acetylation under amino acid starvation
Source: eLife. 2023 Apr 21;12:e85241. doi: 10.7554/eLife.85241 (PMC10191625; doi:10.7554/eLife.85241)
Supplement: Supplementary file 1. [file elife-85241-supp1.xlsx]

## Sheet: summary
Supplementary file 1. Analyses of CPC-1 regulated genes
Sheet 1 - Up regulated genes_WT VS cpc-1KO (12 mM 3-AT)
Sheet 2 - eJTK_cycle analyses_Rhythmic up regulated genes_WT VS cpc-1KO (12 mM 3-AT)
Sheet 3 - Circa_single analyses_Rhythmic up regulated genes_WT VS cpc-1KO (12 mM 3-AT)
Sheet 4 - Down regulated genes_WT VS cpc-1KO (12 mM 3-AT)
Sheet 5 - eJTK_cycle analyses_Rhythmic down regulated genes_WT VS cpc-1KO (12 mM 3-AT)
Sheet 6 - Circa_single analyses_Rhythmic down regulated genes_WT VS cpc-1KO (12 mM 3-AT)
Sheet 7 - Rhythmic genes in WT (Hurley et al., 2018)
Sheet 8 - All detected genes in WT (Hurley et al., 2018)

## Sheet: Sheet 1
gene ID	P_value (eJTK_cycle)	P_value (Circa_single)
NCU00023	0.160533	0.0240875
NCU00088	0.138995	0.0515388
NCU00148	0.0505408	0.358135
NCU00150	0.000751023	0.00366787
NCU00177	0.149445	0.299105
NCU00188	0.439264	0.324809
NCU00281	0.126967	0.452855
NCU00282	0.00362712	0.00702138
NCU00373	7.15268e-07	0.000378145
NCU00377	2.77975e-05	6.42e-05
NCU00441	0.0222524	0.00600428
NCU00477	0.5617	0.135191
NCU00501	0.0103481	0.0143005
NCU00589	0.00140878	0.00162675
NCU00609	0.0360218	0.00681833
NCU00611	0.00746281	0.17323
NCU00784	8.29225e-05	0.0274574
NCU00874	0.000138942	0.0963126
NCU01163	0.362774	0.137214
NCU01380	0.00435657	0.00085989
NCU01429	0.538583	0.086549
NCU01430	0.00189113	0.00121721
NCU01439	0.110988	0.365859
NCU01460	0.00176637	0.00140759
NCU01845	4.81313e-05	3.64e-05
NCU01893	9.94964e-05	0.00996847
NCU01945	0.00122169	0.197937
NCU01989	1.37465e-05	0.00412325
NCU01997	0.28407	0.613764
NCU01998	0.02452	0.0389555
NCU02095	0.0170422	0.294804
NCU02100	0.00819865	0.134018
NCU02190	0.000387086	0.0344862
NCU02325	0.235591	0.459823
NCU02397	5.54713e-07	0.000128258
NCU02401	0.10548	0.12176
NCU02430	0.000829517	0.0228095
NCU02438	0.351564	0.604575
NCU02461	0.227632	0.245737
NCU02505	0.00492017	0.361976
NCU02566	0.235878	0.132812
NCU02639	0.0464667	0.293821
NCU02727	0.15438	0.631558
NCU02765	8.75308e-08	1.14e-07
NCU02906	2.05292e-08	1.1e-05
NCU02948	6.41006e-06	4.98e-06
NCU03076	0.12909	0.466961
NCU03118	0.315816	0.708747
NCU03139	0.000665228	0.0809652
NCU03205	0.000102087	0.000808954
NCU03325	0.0669602	0.0441646
NCU03370	0.225169	0.0888689
NCU03523	0.0333367	0.349396
NCU03575	0.661785	0.271777
NCU03647	0.000291062	0.0123424
NCU03741	0.000505976	0.0118244
NCU03932	0.00152	0.000152292
NCU03978	0.222482	0.0397292
NCU04040	0.082443	0.00269997
NCU04106	0.00019087	0.00837336
NCU04161	0.314133	0.0992176
NCU04201	0.322523	0.381529
NCU04207	0.378649	0.282477
NCU04266	3.84158e-08	5.21e-06
NCU04292	0.202103	0.319778
NCU04307	0.169725	0.602464
NCU04332	0.61582	0.658176
NCU04354	0.156768	0.0241924
NCU04371	0.00095178	0.000196924
NCU04415	2.05106e-06	0.00281877
NCU04474	0.000713967	0.0147198
NCU04569	0.0240828	0.269961
NCU04754	0.991949	0.183813
NCU05198	0.0216591	0.0723602
NCU05306	0.00251389	0.0184638
NCU05385	0.123823	0.141431
NCU05420	0.508013	0.37077
NCU05511	0.524404	0.693688
NCU05527	0.073345	0.704335
NCU05541	0.629581	0.212084
NCU05548	0.056732	0.00420886
NCU05591	0.0195419	0.0709207
NCU06012	0.522614	0.460673
NCU06095	0.000696523	0.0359949
NCU06114	0.600371	0.423135
NCU06128	0.00278279	0.00123789
NCU06230	0.0023917	0.00197202
NCU06360	0.217902	0.0823534
NCU06543	0.176295	0.0230847
NCU06550	7.80927e-07	0.00346296
NCU06643	0.010567	0.0809473
NCU06651	2.78397e-05	0.000665469
NCU06711	0.371191	0.767325
NCU06744	0.655605	0.465106
NCU06809	0.0398195	0.145712
NCU06927	0.86722	0.354042
NCU06977	2.82397e-06	0.00412203
NCU07001	0.00483363	0.0526202
NCU07082	0.0657042	0.405315
NCU07273	5.44394e-05	0.00212748
NCU07337	0.538583	0.237593
NCU07445	0.153072	0.366634
NCU07495	0.000218019	0.0240625
NCU07695	0.617179	0.0966867
NCU07705	0.508013	0.146652
NCU07753	0.324166	0.0449997
NCU07817	0.0566289	0.0328537
NCU07925	0.0250936	0.0523674
NCU07962	0.0144145	0.00250357
NCU08048	4.43123e-05	0.00150269
NCU08057	0.00260616	0.00264986
NCU08131	0.0672442	0.0907369
NCU08195	0.584899	0.244126
NCU08409	0.0124843	0.0979508
NCU08705	0.00252231	0.0665424
NCU08868	0.00170288	0.00479811
NCU09043	2.17275e-05	0.0127442
NCU09135	0.000203136	0.0236161
NCU09193	0.133424	0.137312
NCU09253	0.623529	0.475797
NCU09347	0.584899	0.877009
NCU09384	0.0855644	0.0332676
NCU09463	0.455667	0.264672
NCU09521	1.51335e-05	0.000202967
NCU09541	0.000799431	0.0112225
NCU09794	3.43452e-06	0.000116335
NCU09795	0.262138	0.400039
NCU09821	6.00754e-09	3.2e-07
NCU09829	0.00847779	0.100782
NCU09883	0.0401756	0.51655
NCU09896	0.0384545	0.0375551
NCU10007	0.0042077	0.127942
NCU10011	0.000567103	0.00561213
NCU11030	0.675352	0.296554
NCU11041	0.0423802	0.0181191
NCU11261	0.000241355	0.00181116
NCU11341	0.000959782	0.000198876
NCU11375	0.0723247	0.0505437
NCU14006	NULL	0.240593
NCU14068	NULL	0.0103454
NCU14077	NULL	0.0061406
NCU14110	NULL	0.148348
NCU16534	0.269202	0.472044
NCU16588	0.901624	0.0926177
NCU16624	0.0477185	0.229058
NCU16651	0.690352	0.249867
NCU16708	0.00912044	0.0601744
NCU16952	0.0309142	0.426476

## Sheet: Sheet 2
gene ID	P_value (eJTK_cycle)
NCU00150	0.000751023
NCU00282	0.00362712
NCU00373	7.15268e-07
NCU00377	2.77975e-05
NCU00441	0.0222524
NCU00501	0.0103481
NCU00589	0.00140878
NCU00609	0.0360218
NCU00611	0.00746281
NCU00784	8.29225e-05
NCU00874	0.000138942
NCU01380	0.00435657
NCU01430	0.00189113
NCU01460	0.00176637
NCU01845	4.81313e-05
NCU01893	9.94964e-05
NCU01945	0.00122169
NCU01989	1.37465e-05
NCU01998	0.02452
NCU02095	0.0170422
NCU02100	0.00819865
NCU02190	0.000387086
NCU02397	5.54713e-07
NCU02430	0.000829517
NCU02505	0.00492017
NCU02639	0.0464667
NCU02765	8.75308e-08
NCU02906	2.05292e-08
NCU02948	6.41006e-06
NCU03139	0.000665228
NCU03205	0.000102087
NCU03523	0.0333367
NCU03647	0.000291062
NCU03741	0.000505976
NCU03932	0.00152
NCU04106	0.00019087
NCU04266	3.84158e-08
NCU04371	0.00095178
NCU04415	2.05106e-06
NCU04474	0.000713967
NCU04569	0.0240828
NCU05198	0.0216591
NCU05306	0.00251389
NCU05591	0.0195419
NCU06095	0.000696523
NCU06128	0.00278279
NCU06230	0.0023917
NCU06550	7.80927e-07
NCU06643	0.010567
NCU06651	2.78397e-05
NCU06809	0.0398195
NCU06977	2.82397e-06
NCU07001	0.00483363
NCU07273	5.44394e-05
NCU07495	0.000218019
NCU07925	0.0250936
NCU07962	0.0144145
NCU08048	4.43123e-05
NCU08057	0.00260616
NCU08409	0.0124843
NCU08705	0.00252231
NCU08868	0.00170288
NCU09043	2.17275e-05
NCU09135	0.000203136
NCU09521	1.51335e-05
NCU09541	0.000799431
NCU09794	3.43452e-06
NCU09821	6.00754e-09
NCU09829	0.00847779
NCU09883	0.0401756
NCU09896	0.0384545
NCU10007	0.0042077
NCU10011	0.000567103
NCU11041	0.0423802
NCU11261	0.000241355
NCU11341	0.000959782
NCU16624	0.0477185
NCU16708	0.00912044
NCU16952	0.0309142

## Sheet: Sheet 3
gene ID	P_value (Circa_single)
NCU00023	0.0240875
NCU00150	0.00366787
NCU00282	0.00702138
NCU00373	0.000378145
NCU00377	6.42e-05
NCU00441	0.00600428
NCU00501	0.0143005
NCU00589	0.00162675
NCU00609	0.00681833
NCU00784	0.0274574
NCU01380	0.00085989
NCU01430	0.00121721
NCU01460	0.00140759
NCU01845	3.64e-05
NCU01893	0.00996847
NCU01989	0.00412325
NCU01998	0.0389555
NCU02190	0.0344862
NCU02397	0.000128258
NCU02430	0.0228095
NCU02765	1.14e-07
NCU02906	1.1e-05
NCU02948	4.98e-06
NCU03205	0.000808954
NCU03325	0.0441646
NCU03647	0.0123424
NCU03741	0.0118244
NCU03932	0.000152292
NCU03978	0.0397292
NCU04040	0.00269997
NCU04106	0.00837336
NCU04266	5.21e-06
NCU04354	0.0241924
NCU04371	0.000196924
NCU04415	0.00281877
NCU04474	0.0147198
NCU05306	0.0184638
NCU05548	0.00420886
NCU06095	0.0359949
NCU06128	0.00123789
NCU06230	0.00197202
NCU06543	0.0230847
NCU06550	0.00346296
NCU06651	0.000665469
NCU06977	0.00412203
NCU07273	0.00212748
NCU07495	0.0240625
NCU07753	0.0449997
NCU07817	0.0328537
NCU07962	0.00250357
NCU08048	0.00150269
NCU08057	0.00264986
NCU08868	0.00479811
NCU09043	0.0127442
NCU09135	0.0236161
NCU09384	0.0332676
NCU09521	0.000202967
NCU09541	0.0112225
NCU09794	0.000116335
NCU09821	3.2e-07
NCU09896	0.0375551
NCU10011	0.00561213
NCU11041	0.0181191
NCU11261	0.00181116
NCU11341	0.000198876
NCU14068	0.0103454
NCU14077	0.0061406

## Sheet: Sheet 4
gene ID	P_value (eJTK_cycle)	P_value (Circa_single)
NCU00241	0.000612009	0.00085906
NCU00306	8.29225e-05	0.00906977
NCU00413	1.90623e-05	0.00148507
NCU00489	5.9856e-06	0.000481832
NCU00542	0.00372423	0.00425616
NCU00654	0.0521114	0.00992428
NCU00663	0.366973	0.0618254
NCU00891	0.684396	0.191123
NCU00945	0.394893	0.258515
NCU01097	0.441069	0.692895
NCU01142	0.0138847	0.416721
NCU01175	0.00317866	0.0155719
NCU01205	0.00273462	0.0825437
NCU01342	0.559953	0.26849
NCU01353	0.00716589	0.00402923
NCU01386	0.00210775	0.00185945
NCU01418	0.00290269	0.00162798
NCU01467	0.163139	0.451885
NCU01499	0.325922	0.528869
NCU01528	0.0108555	0.403299
NCU01704	0.0023917	0.0237438
NCU01882	3.86603e-05	0.000289721
NCU01918	0.513832	0.265754
NCU01944	0.00179267	0.0114244
NCU01977	0.115802	0.0111604
NCU02046	0.00467645	0.0213534
NCU02092	0.116776	0.153889
NCU02175	0.00347132	0.00905627
NCU02493	0.00263191	0.150395
NCU02616	0.000284336	0.00915185
NCU02732	0.0140841	0.0113908
NCU02746	0.00111903	0.384363
NCU02883	0.732829	0.32436
NCU02977	4.58359e-06	0.00109445
NCU03045	0.00362737	0.00209739
NCU03137	2.11616e-06	0.000932896
NCU03148	0.0653969	0.157048
NCU03171	0.0421122	0.0940111
NCU03229	0.0544612	0.00535614
NCU03243	0.0683285	0.575138
NCU03393	3.25726e-05	0.0138209
NCU03634	0.000751023	0.0106005
NCU03704	0.0342434	0.055746
NCU03737	0.205463	0.275416
NCU03795	0.260568	0.0971375
NCU03802	0.00230752	0.00238274
NCU03966	0.0322516	0.132924
NCU04046	1.9812e-05	0.00160555
NCU04080	0.0728009	0.0533446
NCU04142	0.000843959	0.100539
NCU04221	0.265278	0.170787
NCU04265	0.457686	0.193593
NCU04312	0.0227503	0.0283645
NCU04382	0.0840333	0.015392
NCU04435	0.25449	0.537345
NCU04442	0.110058	0.0087459
NCU04552	0.00238616	0.199249
NCU04644	0.129085	0.0537255
NCU04645	0.000651171	0.0211058
NCU04817	0.295665	0.181703
NCU04830	1.68097e-06	0.00119676
NCU04986	0.0252871	0.342832
NCU05153	0.00443437	0.0930696
NCU05280	0.790336	0.688216
NCU05356	0.206662	0.335224
NCU05430	0.301572	0.304164
NCU05565	0.0551535	0.0331002
NCU05633	0.917916	0.371176
NCU05686	0.00301385	0.0212888
NCU05810	0.000116738	0.0037508
NCU05881	0.10548	0.17246
NCU05915	0.419531	0.323475
NCU05974	4.61917e-05	5.2e-07
NCU06110	0.0161435	0.12293
NCU06144	0.419531	0.212312
NCU06366	0.00183953	0.0174209
NCU06401	0.09022	0.0321922
NCU06402	0.219105	0.547403
NCU06495	0.134515	0.797116
NCU06521	0.060863	0.220373
NCU06561	0.00870912	0.0311817
NCU06619	0.00447886	0.00462567
NCU06679	5.65764e-05	0.00202003
NCU06743	0.000137577	0.0087178
NCU06879	0.901624	0.837315
NCU06907	0.00660051	0.0438506
NCU06949	0.048679	0.065697
NCU07017	0.00983343	0.0345907
NCU07375	0.068832	0.00747823
NCU07442	0.0412632	0.12245
NCU07491	0.00716589	0.0230574
NCU07513	0.0589574	0.0178724
NCU07534	0.000367839	0.0070407
NCU07569	0.0280695	0.0142231
NCU07787	0.0148095	0.101501
NCU08013	0.00196085	0.0106534
NCU08053	0.184606	0.102804
NCU08169	4.44113e-06	3.56e-05
NCU08217	0.0719898	0.033537
NCU08225	0.0730587	0.0797917
NCU08332	0.90666	0.0299685
NCU08551	0.00554679	0.00992247
NCU08632	0.0701358	0.204195
NCU08637	0.715451	0.23636
NCU08762	0.00114559	0.0317363
NCU08860	0.0967194	0.152722
NCU08909	0.256385	0.0417584
NCU08943	0.104505	0.178289
NCU09132	0.000665228	0.00795674
NCU09187	0.0185948	0.00476322
NCU09208	0.276367	0.286415
NCU09250	0.546275	0.263942
NCU09291	5.11358e-05	0.00508023
NCU09309	0.164368	0.609138
NCU09357	0.570691	0.479109
NCU09374	0.364527	0.0691858
NCU09422	0.010131	0.0267635
NCU09909	0.0531432	0.0113275
NCU09935	0.0740747	0.419186
NCU10008	0.000112173	0.0306069
NCU10048	0.000751023	0.000431787
NCU10907	0.00595651	0.0330004
NCU16367	0.160533	0.411668
NCU16496	0.00475291	0.00359132
NCU16511	0.289831	0.603608
NCU16903	0.403643	0.484493
NCU17116	0.647963	0.04242

## Sheet: Sheet 5
gene ID	P_value (eJTK_cycle)
NCU00241	0.000612009
NCU00306	8.29225e-05
NCU00413	1.90623e-05
NCU00489	5.9856e-06
NCU00542	0.00372423
NCU01142	0.0138847
NCU01175	0.00317866
NCU01205	0.00273462
NCU01353	0.00716589
NCU01386	0.00210775
NCU01418	0.00290269
NCU01528	0.0108555
NCU01704	0.0023917
NCU01882	3.86603e-05
NCU01944	0.00179267
NCU02046	0.00467645
NCU02175	0.00347132
NCU02493	0.00263191
NCU02616	0.000284336
NCU02732	0.0140841
NCU02746	0.00111903
NCU02977	4.58359e-06
NCU03045	0.00362737
NCU03137	2.11616e-06
NCU03171	0.0421122
NCU03393	3.25726e-05
NCU03634	0.000751023
NCU03704	0.0342434
NCU03802	0.00230752
NCU03966	0.0322516
NCU04046	1.9812e-05
NCU04142	0.000843959
NCU04312	0.0227503
NCU04552	0.00238616
NCU04645	0.000651171
NCU04830	1.68097e-06
NCU04986	0.0252871
NCU05153	0.00443437
NCU05686	0.00301385
NCU05810	0.000116738
NCU05974	4.61917e-05
NCU06110	0.0161435
NCU06366	0.00183953
NCU06561	0.00870912
NCU06619	0.00447886
NCU06679	5.65764e-05
NCU06743	0.000137577
NCU06907	0.00660051
NCU06949	0.048679
NCU07017	0.00983343
NCU07442	0.0412632
NCU07491	0.00716589
NCU07534	0.000367839
NCU07569	0.0280695
NCU07787	0.0148095
NCU08013	0.00196085
NCU08169	4.44113e-06
NCU08551	0.00554679
NCU08762	0.00114559
NCU09132	0.000665228
NCU09187	0.0185948
NCU09291	5.11358e-05
NCU09422	0.010131
NCU10008	0.000112173
NCU10048	0.000751023
NCU10907	0.00595651
NCU16496	0.00475291

## Sheet: Sheet 6
gene ID	P_value (Circa_single)
NCU00241	0.00085906
NCU00306	0.00906977
NCU00413	0.00148507
NCU00489	0.000481832
NCU00542	0.00425616
NCU00654	0.00992428
NCU01175	0.0155719
NCU01353	0.00402923
NCU01386	0.00185945
NCU01418	0.00162798
NCU01704	0.0237438
NCU01882	0.000289721
NCU01944	0.0114244
NCU01977	0.0111604
NCU02046	0.0213534
NCU02175	0.00905627
NCU02616	0.00915185
NCU02732	0.0113908
NCU02977	0.00109445
NCU03045	0.00209739
NCU03137	0.000932896
NCU03229	0.00535614
NCU03393	0.0138209
NCU03634	0.0106005
NCU03802	0.00238274
NCU04046	0.00160555
NCU04312	0.0283645
NCU04382	0.015392
NCU04442	0.0087459
NCU04645	0.0211058
NCU04830	0.00119676
NCU05565	0.0331002
NCU05686	0.0212888
NCU05810	0.0037508
NCU05974	5.2e-07
NCU06366	0.0174209
NCU06401	0.0321922
NCU06561	0.0311817
NCU06619	0.00462567
NCU06679	0.00202003
NCU06743	0.0087178
NCU06907	0.0438506
NCU07017	0.0345907
NCU07375	0.00747823
NCU07491	0.0230574
NCU07513	0.0178724
NCU07534	0.0070407
NCU07569	0.0142231
NCU08013	0.0106534
NCU08169	3.56e-05
NCU08217	0.033537
NCU08332	0.0299685
NCU08551	0.00992247
NCU08762	0.0317363
NCU08909	0.0417584
NCU09132	0.00795674
NCU09187	0.00476322
NCU09291	0.00508023
NCU09422	0.0267635
NCU09909	0.0113275
NCU10008	0.0306069
NCU10048	0.000431787
NCU10907	0.0330004
NCU16496	0.00359132
NCU17116	0.04242

## Sheet: Sheet 7
gene ID
NCU00003
NCU00004
NCU00008
NCU00009
NCU00010
NCU00014
NCU00017
NCU00019
NCU00021
NCU00025
NCU00026
NCU00027
NCU00028
NCU00030
NCU00032
NCU00035
NCU00038
NCU00041
NCU00043
NCU00045
NCU00046
NCU00051
NCU00052
NCU00055
NCU00057
NCU00059
NCU00061
NCU00064
NCU00065
NCU00066
NCU00069
NCU00074
NCU00077
NCU00078
NCU00080
NCU00081
NCU00083
NCU00084
NCU00087
NCU00089
NCU00091
NCU00100
NCU00101
NCU00102
NCU00103
NCU00104
NCU00105
NCU00106
NCU00107
NCU00111
NCU00112
NCU00114
NCU00122
NCU00124
NCU00125
NCU00126
NCU00128
NCU00130
NCU00132
NCU00135
NCU00136
NCU00137
NCU00142
NCU00145
NCU00146
NCU00150
NCU00151
NCU00152
NCU00154
NCU00157
NCU00158
NCU00161
NCU00172
NCU00173
NCU00175
NCU00182
NCU00183
NCU00184
NCU00187
NCU00193
NCU00194
NCU00198
NCU00199
NCU00202
NCU00204
NCU00211
NCU00212
NCU00218
NCU00223
NCU00224
NCU00227
NCU00232
NCU00233
NCU00236
NCU00240
NCU00241
NCU00243
NCU00245
NCU00247
NCU00251
NCU00253
NCU00257
NCU00258
NCU00260
NCU00261
NCU00263
NCU00264
NCU00267
NCU00269
NCU00270
NCU00273
NCU00275
NCU00276
NCU00277
NCU00278
NCU00282
NCU00283
NCU00285
NCU00287
NCU00291
NCU00292
NCU00294
NCU00301
NCU00305
NCU00306
NCU00309
NCU00311
NCU00312
NCU00316
NCU00321
NCU00322
NCU00326
NCU00329
NCU00332
NCU00336
NCU00337
NCU00338
NCU00344
NCU00346
NCU00347
NCU00350
NCU00351
NCU00352
NCU00359
NCU00363
NCU00364
NCU00366
NCU00369
NCU00370
NCU00371
NCU00372
NCU00373
NCU00375
NCU00376
NCU00377
NCU00378
NCU00379
NCU00382
NCU00387
NCU00392
NCU00395
NCU00396
NCU00397
NCU00399
NCU00400
NCU00401
NCU00404
NCU00406
NCU00407
NCU00408
NCU00409
NCU00413
NCU00414
NCU00418
NCU00419
NCU00420
NCU00422
NCU00423
NCU00427
NCU00428
NCU00431
NCU00432
NCU00434
NCU00436
NCU00437
NCU00441
NCU00444
NCU00447
NCU00449
NCU00450
NCU00451
NCU00453
NCU00454
NCU00456
NCU00458
NCU00461
NCU00463
NCU00464
NCU00465
NCU00466
NCU00468
NCU00472
NCU00475
NCU00481
NCU00483
NCU00484
NCU00485
NCU00486
NCU00489
NCU00495
NCU00496
NCU00498
NCU00501
NCU00518
NCU00519
NCU00521
NCU00522
NCU00527
NCU00528
NCU00536
NCU00537
NCU00542
NCU00549
NCU00550
NCU00552
NCU00553
NCU00556
NCU00559
NCU00560
NCU00561
NCU00564
NCU00565
NCU00567
NCU00573
NCU00575
NCU00576
NCU00580
NCU00581
NCU00585
NCU00589
NCU00590
NCU00591
NCU00593
NCU00595
NCU00596
NCU00597
NCU00598
NCU00599
NCU00600
NCU00605
NCU00608
NCU00609
NCU00611
NCU00616
NCU00617
NCU00618
NCU00619
NCU00622
NCU00628
NCU00633
NCU00634
NCU00635
NCU00636
NCU00643
NCU00649
NCU00650
NCU00651
NCU00656
NCU00657
NCU00660
NCU00670
NCU00673
NCU00674
NCU00677
NCU00678
NCU00680
NCU00685
NCU00687
NCU00689
NCU00692
NCU00696
NCU00697
NCU00701
NCU00706
NCU00707
NCU00709
NCU00710
NCU00712
NCU00714
NCU00716
NCU00717
NCU00718
NCU00720
NCU00721
NCU00722
NCU00726
NCU00729
NCU00730
NCU00732
NCU00735
NCU00738
NCU00740
NCU00741
NCU00748
NCU00749
NCU00759
NCU00766
NCU00770
NCU00772
NCU00775
NCU00777
NCU00781
NCU00782
NCU00784
NCU00789
NCU00792
NCU00793
NCU00795
NCU00796
NCU00802
NCU00803
NCU00805
NCU00810
NCU00811
NCU00812
NCU00813
NCU00825
NCU00826
NCU00827
NCU00833
NCU00837
NCU00838
NCU00839
NCU00843
NCU00844
NCU00853
NCU00854
NCU00855
NCU00859
NCU00863
NCU00864
NCU00865
NCU00869
NCU00873
NCU00874
NCU00875
NCU00877
NCU00878
NCU00880
NCU00881
NCU00884
NCU00886
NCU00887
NCU00889
NCU00892
NCU00897
NCU00898
NCU00899
NCU00900
NCU00902
NCU00906
NCU00911
NCU00912
NCU00913
NCU00914
NCU00918
NCU00919
NCU00920
NCU00925
NCU00926
NCU00929
NCU00930
NCU00935
NCU00936
NCU00937
NCU00938
NCU00939
NCU00944
NCU00949
NCU00952
NCU00953
NCU00955
NCU00957
NCU00959
NCU00963
NCU00964
NCU00965
NCU00967
NCU00971
NCU00972
NCU00974
NCU00977
NCU00979
NCU00981
NCU00983
NCU00984
NCU00985
NCU00987
NCU00988
NCU00990
NCU00993
NCU00995
NCU00998
NCU01001
NCU01002
NCU01004
NCU01007
NCU01024
NCU01026
NCU01027
NCU01032
NCU01041
NCU01052
NCU01053
NCU01060
NCU01061
NCU01063
NCU01065
NCU01070
NCU01072
NCU01074
NCU01083
NCU01088
NCU01089
NCU01092
NCU01094
NCU01100
NCU01101
NCU01102
NCU01104
NCU01106
NCU01107
NCU01108
NCU01111
NCU01112
NCU01113
NCU01115
NCU01118
NCU01119
NCU01121
NCU01123
NCU01127
NCU01140
NCU01142
NCU01145
NCU01146
NCU01147
NCU01149
NCU01150
NCU01153
NCU01154
NCU01160
NCU01161
NCU01162
NCU01165
NCU01166
NCU01167
NCU01170
NCU01172
NCU01174
NCU01175
NCU01176
NCU01178
NCU01183
NCU01187
NCU01189
NCU01190
NCU01196
NCU01198
NCU01201
NCU01205
NCU01207
NCU01208
NCU01209
NCU01215
NCU01219
NCU01220
NCU01221
NCU01223
NCU01225
NCU01227
NCU01233
NCU01236
NCU01243
NCU01246
NCU01248
NCU01249
NCU01256
NCU01257
NCU01258
NCU01259
NCU01260
NCU01267
NCU01270
NCU01271
NCU01274
NCU01275
NCU01276
NCU01277
NCU01285
NCU01288
NCU01289
NCU01290
NCU01291
NCU01296
NCU01301
NCU01307
NCU01313
NCU01315
NCU01317
NCU01318
NCU01320
NCU01321
NCU01327
NCU01329
NCU01331
NCU01332
NCU01333
NCU01338
NCU01340
NCU01343
NCU01344
NCU01345
NCU01347
NCU01351
NCU01353
NCU01358
NCU01362
NCU01366
NCU01369
NCU01370
NCU01373
NCU01376
NCU01380
NCU01385
NCU01386
NCU01388
NCU01389
NCU01390
NCU01393
NCU01399
NCU01400
NCU01408
NCU01409
NCU01414
NCU01416
NCU01418
NCU01419
NCU01420
NCU01426
NCU01427
NCU01428
NCU01430
NCU01438
NCU01443
NCU01445
NCU01447
NCU01449
NCU01452
NCU01454
NCU01456
NCU01457
NCU01458
NCU01459
NCU01460
NCU01461
NCU01462
NCU01465
NCU01468
NCU01470
NCU01471
NCU01473
NCU01474
NCU01476
NCU01479
NCU01480
NCU01481
NCU01483
NCU01485
NCU01487
NCU01488
NCU01489
NCU01491
NCU01493
NCU01496
NCU01498
NCU01502
NCU01503
NCU01504
NCU01506
NCU01510
NCU01512
NCU01514
NCU01515
NCU01516
NCU01524
NCU01525
NCU01527
NCU01528
NCU01534
NCU01545
NCU01549
NCU01551
NCU01552
NCU01555
NCU01559
NCU01560
NCU01562
NCU01568
NCU01571
NCU01575
NCU01577
NCU01593
NCU01595
NCU01606
NCU01608
NCU01611
NCU01612
NCU01613
NCU01615
NCU01620
NCU01634
NCU01635
NCU01638
NCU01643
NCU01644
NCU01646
NCU01655
NCU01657
NCU01658
NCU01659
NCU01660
NCU01666
NCU01667
NCU01669
NCU01670
NCU01673
NCU01675
NCU01678
NCU01680
NCU01689
NCU01692
NCU01697
NCU01701
NCU01702
NCU01704
NCU01705
NCU01713
NCU01720
NCU01725
NCU01731
NCU01734
NCU01735
NCU01741
NCU01742
NCU01745
NCU01747
NCU01752
NCU01753
NCU01759
NCU01764
NCU01766
NCU01767
NCU01768
NCU01769
NCU01776
NCU01784
NCU01786
NCU01789
NCU01790
NCU01792
NCU01793
NCU01800
NCU01802
NCU01803
NCU01806
NCU01812
NCU01813
NCU01814
NCU01816
NCU01817
NCU01819
NCU01821
NCU01824
NCU01826
NCU01827
NCU01828
NCU01831
NCU01833
NCU01835
NCU01838
NCU01845
NCU01846
NCU01854
NCU01856
NCU01859
NCU01861
NCU01862
NCU01869
NCU01870
NCU01873
NCU01878
NCU01882
NCU01886
NCU01888
NCU01893
NCU01895
NCU01896
NCU01899
NCU01900
NCU01902
NCU01903
NCU01904
NCU01905
NCU01906
NCU01910
NCU01914
NCU01919
NCU01920
NCU01926
NCU01927
NCU01935
NCU01938
NCU01939
NCU01940
NCU01944
NCU01945
NCU01946
NCU01948
NCU01949
NCU01957
NCU01958
NCU01962
NCU01966
NCU01967
NCU01969
NCU01970
NCU01972
NCU01973
NCU01975
NCU01976
NCU01978
NCU01983
NCU01989
NCU01990
NCU01991
NCU01993
NCU01994
NCU01996
NCU01998
NCU02001
NCU02002
NCU02003
NCU02004
NCU02007
NCU02009
NCU02012
NCU02017
NCU02020
NCU02022
NCU02024
NCU02025
NCU02026
NCU02027
NCU02028
NCU02031
NCU02041
NCU02043
NCU02046
NCU02051
NCU02054
NCU02055
NCU02056
NCU02057
NCU02059
NCU02061
NCU02062
NCU02065
NCU02066
NCU02068
NCU02070
NCU02071
NCU02074
NCU02075
NCU02076
NCU02078
NCU02084
NCU02086
NCU02090
NCU02095
NCU02096
NCU02097
NCU02098
NCU02099
NCU02100
NCU02105
NCU02106
NCU02109
NCU02110
NCU02111
NCU02117
NCU02119
NCU02120
NCU02123
NCU02124
NCU02126
NCU02127
NCU02128
NCU02136
NCU02138
NCU02139
NCU02142
NCU02144
NCU02145
NCU02151
NCU02155
NCU02165
NCU02167
NCU02170
NCU02172
NCU02174
NCU02175
NCU02181
NCU02182
NCU02187
NCU02188
NCU02190
NCU02191
NCU02192
NCU02193
NCU02202
NCU02207
NCU02208
NCU02209
NCU02211
NCU02213
NCU02214
NCU02223
NCU02226
NCU02227
NCU02230
NCU02232
NCU02236
NCU02240
NCU02242
NCU02243
NCU02244
NCU02246
NCU02247
NCU02250
NCU02252
NCU02256
NCU02257
NCU02259
NCU02261
NCU02262
NCU02264
NCU02265
NCU02269
NCU02270
NCU02273
NCU02278
NCU02282
NCU02284
NCU02287
NCU02291
NCU02294
NCU02296
NCU02299
NCU02301
NCU02302
NCU02303
NCU02305
NCU02307
NCU02311
NCU02317
NCU02319
NCU02321
NCU02322
NCU02329
NCU02333
NCU02335
NCU02336
NCU02338
NCU02342
NCU02343
NCU02348
NCU02351
NCU02356
NCU02357
NCU02358
NCU02360
NCU02362
NCU02363
NCU02364
NCU02369
NCU02370
NCU02371
NCU02373
NCU02376
NCU02378
NCU02381
NCU02386
NCU02388
NCU02390
NCU02395
NCU02397
NCU02399
NCU02400
NCU02405
NCU02407
NCU02408
NCU02411
NCU02413
NCU02416
NCU02417
NCU02419
NCU02420
NCU02424
NCU02425
NCU02428
NCU02429
NCU02430
NCU02432
NCU02434
NCU02435
NCU02437
NCU02450
NCU02452
NCU02457
NCU02459
NCU02460
NCU02464
NCU02466
NCU02468
NCU02470
NCU02472
NCU02474
NCU02478
NCU02482
NCU02486
NCU02490
NCU02491
NCU02492
NCU02493
NCU02494
NCU02495
NCU02497
NCU02499
NCU02500
NCU02505
NCU02509
NCU02511
NCU02513
NCU02517
NCU02519
NCU02520
NCU02522
NCU02525
NCU02526
NCU02529
NCU02531
NCU02533
NCU02536
NCU02539
NCU02540
NCU02542
NCU02546
NCU02550
NCU02552
NCU02553
NCU02555
NCU02563
NCU02564
NCU02568
NCU02573
NCU02579
NCU02583
NCU02584
NCU02585
NCU02587
NCU02590
NCU02592
NCU02594
NCU02596
NCU02597
NCU02599
NCU02602
NCU02603
NCU02604
NCU02605
NCU02609
NCU02610
NCU02612
NCU02616
NCU02617
NCU02621
NCU02623
NCU02627
NCU02630
NCU02631
NCU02638
NCU02639
NCU02640
NCU02644
NCU02650
NCU02651
NCU02652
NCU02653
NCU02654
NCU02658
NCU02664
NCU02665
NCU02668
NCU02671
NCU02680
NCU02687
NCU02688
NCU02689
NCU02690
NCU02692
NCU02701
NCU02702
NCU02705
NCU02707
NCU02711
NCU02712
NCU02713
NCU02716
NCU02718
NCU02720
NCU02726
NCU02729
NCU02730
NCU02732
NCU02735
NCU02741
NCU02742
NCU02743
NCU02744
NCU02746
NCU02748
NCU02749
NCU02750
NCU02754
NCU02755
NCU02757
NCU02761
NCU02764
NCU02765
NCU02767
NCU02772
NCU02773
NCU02778
NCU02781
NCU02783
NCU02789
NCU02790
NCU02794
NCU02795
NCU02797
NCU02800
NCU02802
NCU02803
NCU02804
NCU02805
NCU02807
NCU02808
NCU02810
NCU02811
NCU02813
NCU02814
NCU02819
NCU02826
NCU02829
NCU02830
NCU02833
NCU02834
NCU02837
NCU02838
NCU02842
NCU02846
NCU02850
NCU02853
NCU02854
NCU02876
NCU02877
NCU02878
NCU02880
NCU02882
NCU02885
NCU02887
NCU02888
NCU02890
NCU02894
NCU02897
NCU02899
NCU02903
NCU02904
NCU02905
NCU02906
NCU02909
NCU02913
NCU02916
NCU02917
NCU02919
NCU02921
NCU02923
NCU02924
NCU02925
NCU02930
NCU02932
NCU02934
NCU02935
NCU02940
NCU02942
NCU02943
NCU02948
NCU02950
NCU02951
NCU02954
NCU02955
NCU02956
NCU02959
NCU02976
NCU02977
NCU02978
NCU02980
NCU02988
NCU02990
NCU02994
NCU03004
NCU03009
NCU03011
NCU03015
NCU03016
NCU03019
NCU03021
NCU03022
NCU03023
NCU03030
NCU03031
NCU03034
NCU03035
NCU03036
NCU03038
NCU03042
NCU03043
NCU03045
NCU03051
NCU03054
NCU03055
NCU03058
NCU03060
NCU03061
NCU03063
NCU03064
NCU03066
NCU03070
NCU03071
NCU03072
NCU03074
NCU03077
NCU03078
NCU03080
NCU03085
NCU03086
NCU03087
NCU03091
NCU03092
NCU03093
NCU03098
NCU03100
NCU03101
NCU03102
NCU03103
NCU03112
NCU03115
NCU03116
NCU03117
NCU03121
NCU03124
NCU03126
NCU03128
NCU03130
NCU03132
NCU03135
NCU03136
NCU03137
NCU03139
NCU03142
NCU03145
NCU03150
NCU03151
NCU03152
NCU03154
NCU03155
NCU03159
NCU03160
NCU03166
NCU03167
NCU03168
NCU03171
NCU03173
NCU03174
NCU03177
NCU03178
NCU03180
NCU03186
NCU03188
NCU03191
NCU03192
NCU03197
NCU03200
NCU03205
NCU03207
NCU03209
NCU03213
NCU03216
NCU03219
NCU03220
NCU03221
NCU03222
NCU03230
NCU03234
NCU03237
NCU03238
NCU03239
NCU03240
NCU03241
NCU03245
NCU03246
NCU03248
NCU03253
NCU03254
NCU03255
NCU03258
NCU03261
NCU03263
NCU03264
NCU03266
NCU03267
NCU03268
NCU03269
NCU03270
NCU03273
NCU03274
NCU03278
NCU03279
NCU03280
NCU03281
NCU03282
NCU03283
NCU03284
NCU03290
NCU03293
NCU03294
NCU03297
NCU03299
NCU03300
NCU03302
NCU03304
NCU03308
NCU03311
NCU03313
NCU03315
NCU03316
NCU03318
NCU03320
NCU03321
NCU03322
NCU03323
NCU03331
NCU03332
NCU03333
NCU03334
NCU03338
NCU03339
NCU03343
NCU03347
NCU03352
NCU03354
NCU03357
NCU03358
NCU03360
NCU03362
NCU03365
NCU03366
NCU03372
NCU03376
NCU03378
NCU03380
NCU03381
NCU03383
NCU03385
NCU03387
NCU03392
NCU03393
NCU03394
NCU03396
NCU03399
NCU03401
NCU03405
NCU03413
NCU03415
NCU03417
NCU03418
NCU03421
NCU03422
NCU03423
NCU03424
NCU03437
NCU03439
NCU03440
NCU03444
NCU03451
NCU03458
NCU03459
NCU03460
NCU03462
NCU03463
NCU03468
NCU03478
NCU03484
NCU03485
NCU03486
NCU03488
NCU03489
NCU03491
NCU03496
NCU03497
NCU03500
NCU03501
NCU03504
NCU03506
NCU03509
NCU03516
NCU03517
NCU03518
NCU03523
NCU03528
NCU03530
NCU03539
NCU03545
NCU03549
NCU03555
NCU03557
NCU03560
NCU03561
NCU03565
NCU03578
NCU03590
NCU03593
NCU03596
NCU03604
NCU03606
NCU03610
NCU03613
NCU03614
NCU03616
NCU03617
NCU03618
NCU03621
NCU03622
NCU03625
NCU03628
NCU03629
NCU03630
NCU03631
NCU03633
NCU03634
NCU03635
NCU03636
NCU03639
NCU03643
NCU03645
NCU03647
NCU03648
NCU03649
NCU03650
NCU03653
NCU03658
NCU03660
NCU03662
NCU03667
NCU03669
NCU03670
NCU03673
NCU03675
NCU03678
NCU03682
NCU03685
NCU03697
NCU03699
NCU03702
NCU03703
NCU03704
NCU03711
NCU03714
NCU03716
NCU03728
NCU03730
NCU03733
NCU03736
NCU03738
NCU03739
NCU03741
NCU03747
NCU03748
NCU03749
NCU03752
NCU03753
NCU03754
NCU03755
NCU03756
NCU03757
NCU03759
NCU03763
NCU03769
NCU03770
NCU03773
NCU03774
NCU03775
NCU03777
NCU03778
NCU03779
NCU03780
NCU03783
NCU03793
NCU03794
NCU03796
NCU03797
NCU03802
NCU03803
NCU03806
NCU03807
NCU03808
NCU03810
NCU03811
NCU03813
NCU03816
NCU03818
NCU03825
NCU03827
NCU03830
NCU03836
NCU03846
NCU03850
NCU03852
NCU03859
NCU03860
NCU03863
NCU03870
NCU03876
NCU03879
NCU03886
NCU03888
NCU03890
NCU03897
NCU03899
NCU03903
NCU03905
NCU03906
NCU03907
NCU03908
NCU03909
NCU03910
NCU03921
NCU03922
NCU03924
NCU03926
NCU03928
NCU03929
NCU03931
NCU03932
NCU03946
NCU03947
NCU03948
NCU03949
NCU03950
NCU03952
NCU03954
NCU03956
NCU03960
NCU03961
NCU03963
NCU03966
NCU03967
NCU03973
NCU03975
NCU03979
NCU03981
NCU03985
NCU03986
NCU03988
NCU03989
NCU03990
NCU03992
NCU03998
NCU04001
NCU04005
NCU04007
NCU04008
NCU04010
NCU04013
NCU04015
NCU04016
NCU04017
NCU04019
NCU04022
NCU04024
NCU04025
NCU04030
NCU04033
NCU04035
NCU04037
NCU04039
NCU04041
NCU04043
NCU04045
NCU04046
NCU04047
NCU04049
NCU04053
NCU04054
NCU04058
NCU04059
NCU04061
NCU04065
NCU04068
NCU04070
NCU04071
NCU04075
NCU04076
NCU04078
NCU04084
NCU04085
NCU04086
NCU04090
NCU04091
NCU04092
NCU04097
NCU04102
NCU04105
NCU04106
NCU04109
NCU04110
NCU04111
NCU04115
NCU04121
NCU04122
NCU04130
NCU04131
NCU04136
NCU04138
NCU04142
NCU04143
NCU04144
NCU04145
NCU04148
NCU04150
NCU04152
NCU04154
NCU04155
NCU04156
NCU04158
NCU04160
NCU04163
NCU04165
NCU04166
NCU04170
NCU04171
NCU04174
NCU04175
NCU04179
NCU04185
NCU04189
NCU04192
NCU04193
NCU04194
NCU04195
NCU04196
NCU04197
NCU04211
NCU04213
NCU04216
NCU04223
NCU04224
NCU04227
NCU04228
NCU04237
NCU04238
NCU04241
NCU04243
NCU04245
NCU04246
NCU04247
NCU04251
NCU04252
NCU04255
NCU04256
NCU04264
NCU04266
NCU04267
NCU04268
NCU04269
NCU04270
NCU04281
NCU04284
NCU04285
NCU04287
NCU04288
NCU04289
NCU04290
NCU04293
NCU04295
NCU04298
NCU04301
NCU04303
NCU04305
NCU04306
NCU04310
NCU04312
NCU04313
NCU04314
NCU04315
NCU04316
NCU04319
NCU04323
NCU04325
NCU04327
NCU04331
NCU04333
NCU04336
NCU04338
NCU04341
NCU04342
NCU04343
NCU04345
NCU04348
NCU04353
NCU04359
NCU04362
NCU04366
NCU04367
NCU04368
NCU04370
NCU04371
NCU04373
NCU04374
NCU04381
NCU04383
NCU04385
NCU04388
NCU04389
NCU04395
NCU04401
NCU04403
NCU04406
NCU04407
NCU04409
NCU04410
NCU04411
NCU04412
NCU04414
NCU04415
NCU04416
NCU04419
NCU04427
NCU04430
NCU04439
NCU04443
NCU04444
NCU04446
NCU04450
NCU04452
NCU04455
NCU04457
NCU04459
NCU04460
NCU04461
NCU04462
NCU04463
NCU04466
NCU04468
NCU04472
NCU04473
NCU04474
NCU04478
NCU04483
NCU04485
NCU04488
NCU04493
NCU04495
NCU04496
NCU04499
NCU04501
NCU04502
NCU04503
NCU04504
NCU04505
NCU04507
NCU04508
NCU04509
NCU04510
NCU04513
NCU04514
NCU04520
NCU04521
NCU04525
NCU04532
NCU04538
NCU04539
NCU04543
NCU04544
NCU04545
NCU04549
NCU04550
NCU04552
NCU04553
NCU04554
NCU04558
NCU04569
NCU04570
NCU04577
NCU04578
NCU04580
NCU04581
NCU04583
NCU04584
NCU04585
NCU04589
NCU04590
NCU04591
NCU04592
NCU04594
NCU04596
NCU04598
NCU04601
NCU04603
NCU04605
NCU04610
NCU04612
NCU04613
NCU04615
NCU04616
NCU04617
NCU04620
NCU04621
NCU04622
NCU04623
NCU04635
NCU04636
NCU04639
NCU04640
NCU04642
NCU04645
NCU04646
NCU04647
NCU04648
NCU04651
NCU04652
NCU04653
NCU04654
NCU04655
NCU04662
NCU04665
NCU04667
NCU04669
NCU04674
NCU04675
NCU04676
NCU04691
NCU04713
NCU04718
NCU04721
NCU04722
NCU04725
NCU04732
NCU04736
NCU04738
NCU04740
NCU04746
NCU04755
NCU04757
NCU04765
NCU04774
NCU04777
NCU04779
NCU04780
NCU04783
NCU04786
NCU04787
NCU04788
NCU04789
NCU04790
NCU04791
NCU04795
NCU04797
NCU04799
NCU04800
NCU04801
NCU04802
NCU04803
NCU04806
NCU04814
NCU04815
NCU04818
NCU04823
NCU04824
NCU04830
NCU04832
NCU04834
NCU04835
NCU04837
NCU04838
NCU04840
NCU04841
NCU04843
NCU04847
NCU04848
NCU04850
NCU04856
NCU04857
NCU04861
NCU04862
NCU04872
NCU04880
NCU04898
NCU04903
NCU04904
NCU04907
NCU04908
NCU04910
NCU04914
NCU04917
NCU04921
NCU04923
NCU04927
NCU04930
NCU04931
NCU04932
NCU04939
NCU04940
NCU04943
NCU04950
NCU04951
NCU04952
NCU04953
NCU04959
NCU04963
NCU04986
NCU04990
NCU04996
NCU04997
NCU05001
NCU05005
NCU05006
NCU05007
NCU05008
NCU05009
NCU05019
NCU05020
NCU05023
NCU05028
NCU05029
NCU05032
NCU05038
NCU05039
NCU05040
NCU05041
NCU05043
NCU05044
NCU05046
NCU05049
NCU05050
NCU05060
NCU05063
NCU05064
NCU05066
NCU05068
NCU05069
NCU05075
NCU05076
NCU05077
NCU05079
NCU05082
NCU05084
NCU05089
NCU05099
NCU05107
NCU05118
NCU05119
NCU05120
NCU05123
NCU05129
NCU05134
NCU05135
NCU05136
NCU05141
NCU05142
NCU05143
NCU05146
NCU05147
NCU05148
NCU05149
NCU05153
NCU05157
NCU05160
NCU05161
NCU05169
NCU05180
NCU05182
NCU05183
NCU05185
NCU05194
NCU05195
NCU05198
NCU05200
NCU05202
NCU05203
NCU05206
NCU05210
NCU05218
NCU05221
NCU05225
NCU05226
NCU05228
NCU05229
NCU05232
NCU05233
NCU05234
NCU05235
NCU05236
NCU05245
NCU05246
NCU05248
NCU05255
NCU05256
NCU05257
NCU05259
NCU05263
NCU05265
NCU05268
NCU05271
NCU05274
NCU05276
NCU05277
NCU05278
NCU05279
NCU05284
NCU05285
NCU05286
NCU05287
NCU05288
NCU05289
NCU05290
NCU05291
NCU05292
NCU05293
NCU05294
NCU05301
NCU05302
NCU05303
NCU05304
NCU05306
NCU05308
NCU05311
NCU05312
NCU05314
NCU05316
NCU05321
NCU05338
NCU05341
NCU05343
NCU05345
NCU05347
NCU05349
NCU05364
NCU05370
NCU05373
NCU05384
NCU05386
NCU05387
NCU05394
NCU05401
NCU05404
NCU05411
NCU05414
NCU05418
NCU05419
NCU05421
NCU05426
NCU05427
NCU05429
NCU05433
NCU05453
NCU05454
NCU05458
[truncated: 1,859 more rows]

## Sheet: Sheet 8
gene ID
NCU00003
NCU00004
NCU00005
NCU00006
NCU00007
NCU00008
NCU00009
NCU00010
NCU00011
NCU00013
NCU00014
NCU00015
NCU00017
NCU00018
NCU00019
NCU00021
NCU00022
NCU00023
NCU00024
NCU00025
NCU00026
NCU00027
NCU00028
NCU00029
NCU00030
NCU00031
NCU00032
NCU00033
NCU00034
NCU00035
NCU00037
NCU00038
NCU00039
NCU00040
NCU00041
NCU00042
NCU00043
NCU00045
NCU00046
NCU00047
NCU00048
NCU00050
NCU00051
NCU00052
NCU00054
NCU00055
NCU00056
NCU00057
NCU00059
NCU00060
NCU00061
NCU00064
NCU00065
NCU00066
NCU00067
NCU00068
NCU00069
NCU00070
NCU00071
NCU00072
NCU00073
NCU00074
NCU00075
NCU00076
NCU00077
NCU00078
NCU00079
NCU00080
NCU00081
NCU00082
NCU00083
NCU00084
NCU00085
NCU00086
NCU00087
NCU00088
NCU00089
NCU00090
NCU00091
NCU00092
NCU00093
NCU00095
NCU00096
NCU00097
NCU00099
NCU00100
NCU00101
NCU00102
NCU00103
NCU00104
NCU00105
NCU00106
NCU00107
NCU00108
NCU00109
NCU00110
NCU00111
NCU00112
NCU00114
NCU00115
NCU00116
NCU00117
NCU00118
NCU00119
NCU00120
NCU00121
NCU00122
NCU00123
NCU00124
NCU00125
NCU00126
NCU00127
NCU00128
NCU00129
NCU00130
NCU00132
NCU00133
NCU00134
NCU00135
NCU00136
NCU00137
NCU00138
NCU00142
NCU00143
NCU00144
NCU00145
NCU00146
NCU00147
NCU00148
NCU00149
NCU00150
NCU00151
NCU00152
NCU00153
NCU00154
NCU00155
NCU00157
NCU00158
NCU00159
NCU00160
NCU00161
NCU00162
NCU00163
NCU00164
NCU00166
NCU00167
NCU00168
NCU00169
NCU00170
NCU00171
NCU00172
NCU00173
NCU00175
NCU00176
NCU00177
NCU00178
NCU00179
NCU00180
NCU00181
NCU00182
NCU00183
NCU00184
NCU00185
NCU00186
NCU00187
NCU00188
NCU00189
NCU00192
NCU00193
NCU00194
NCU00195
NCU00196
NCU00197
NCU00198
NCU00199
NCU00200
NCU00201
NCU00202
NCU00203
NCU00204
NCU00205
NCU00206
NCU00207
NCU00208
NCU00209
NCU00210
NCU00211
NCU00212
NCU00213
NCU00214
NCU00215
NCU00216
NCU00218
NCU00219
NCU00220
NCU00221
NCU00222
NCU00223
NCU00224
NCU00225
NCU00226
NCU00227
NCU00229
NCU00230
NCU00231
NCU00232
NCU00233
NCU00234
NCU00236
NCU00237
NCU00238
NCU00239
NCU00240
NCU00241
NCU00242
NCU00243
NCU00244
NCU00245
NCU00246
NCU00247
NCU00248
NCU00249
NCU00250
NCU00251
NCU00252
NCU00253
NCU00254
NCU00257
NCU00258
NCU00259
NCU00260
NCU00261
NCU00262
NCU00263
NCU00264
NCU00265
NCU00267
NCU00268
NCU00269
NCU00270
NCU00271
NCU00272
NCU00273
NCU00274
NCU00275
NCU00276
NCU00277
NCU00278
NCU00279
NCU00280
NCU00281
NCU00282
NCU00283
NCU00284
NCU00285
NCU00287
NCU00288
NCU00289
NCU00290
NCU00291
NCU00292
NCU00293
NCU00294
NCU00295
NCU00296
NCU00297
NCU00298
NCU00299
NCU00300
NCU00301
NCU00302
NCU00303
NCU00304
NCU00305
NCU00306
NCU00307
NCU00308
NCU00309
NCU00310
NCU00311
NCU00312
NCU00313
NCU00314
NCU00315
NCU00316
NCU00317
NCU00318
NCU00319
NCU00320
NCU00321
NCU00322
NCU00324
NCU00325
NCU00326
NCU00327
NCU00329
NCU00330
NCU00331
NCU00332
NCU00333
NCU00334
NCU00335
NCU00336
NCU00337
NCU00338
NCU00339
NCU00340
NCU00343
NCU00344
NCU00345
NCU00346
NCU00347
NCU00348
NCU00349
NCU00350
NCU00351
NCU00352
NCU00353
NCU00354
NCU00355
NCU00356
NCU00357
NCU00358
NCU00359
NCU00360
NCU00361
NCU00362
NCU00363
NCU00364
NCU00365
NCU00366
NCU00367
NCU00368
NCU00369
NCU00370
NCU00371
NCU00372
NCU00373
NCU00375
NCU00376
NCU00377
NCU00378
NCU00379
NCU00380
NCU00382
NCU00384
NCU00385
NCU00386
NCU00387
NCU00388
NCU00389
NCU00391
NCU00392
NCU00395
NCU00396
NCU00397
NCU00398
NCU00399
NCU00400
NCU00401
NCU00403
NCU00404
NCU00405
NCU00406
NCU00407
NCU00408
NCU00409
NCU00410
NCU00411
NCU00412
NCU00413
NCU00414
NCU00415
NCU00416
NCU00417
NCU00418
NCU00419
NCU00420
NCU00421
NCU00422
NCU00423
NCU00424
NCU00425
NCU00426
NCU00427
NCU00428
NCU00430
NCU00431
NCU00432
NCU00434
NCU00435
NCU00436
NCU00437
NCU00438
NCU00439
NCU00440
NCU00441
NCU00442
NCU00443
NCU00444
NCU00445
NCU00446
NCU00447
NCU00448
NCU00449
NCU00450
NCU00451
NCU00453
NCU00454
NCU00455
NCU00456
NCU00457
NCU00458
NCU00459
NCU00461
NCU00462
NCU00463
NCU00464
NCU00465
NCU00466
NCU00467
NCU00468
NCU00469
NCU00470
NCU00471
NCU00472
NCU00473
NCU00474
NCU00475
NCU00476
NCU00477
NCU00478
NCU00480
NCU00481
NCU00483
NCU00484
NCU00485
NCU00486
NCU00487
NCU00488
NCU00489
NCU00490
NCU00491
NCU00492
NCU00493
NCU00494
NCU00495
NCU00496
NCU00497
NCU00498
NCU00499
NCU00500
NCU00501
NCU00502
NCU00503
NCU00504
NCU00505
NCU00506
NCU00509
NCU00510
NCU00512
NCU00513
NCU00515
NCU00516
NCU00517
NCU00518
NCU00519
NCU00520
NCU00521
NCU00522
NCU00523
NCU00524
NCU00525
NCU00526
NCU00527
NCU00528
NCU00529
NCU00530
NCU00531
NCU00532
NCU00533
NCU00534
NCU00535
NCU00536
NCU00537
NCU00538
NCU00541
NCU00542
NCU00545
NCU00547
NCU00548
NCU00549
NCU00550
NCU00551
NCU00552
NCU00553
NCU00554
NCU00556
NCU00557
NCU00558
NCU00559
NCU00560
NCU00561
NCU00562
NCU00563
NCU00564
NCU00565
NCU00566
NCU00567
NCU00568
NCU00569
NCU00570
NCU00571
NCU00572
NCU00573
NCU00574
NCU00575
NCU00576
NCU00577
NCU00578
NCU00579
NCU00580
NCU00581
NCU00582
NCU00583
NCU00584
NCU00585
NCU00586
NCU00587
NCU00589
NCU00590
NCU00591
NCU00592
NCU00593
NCU00594
NCU00595
NCU00596
NCU00597
NCU00598
NCU00599
NCU00600
NCU00602
NCU00603
NCU00604
NCU00605
NCU00606
NCU00607
NCU00608
NCU00609
NCU00611
NCU00614
NCU00616
NCU00617
NCU00618
NCU00619
NCU00620
NCU00621
NCU00622
NCU00623
NCU00624
NCU00627
NCU00628
NCU00629
NCU00630
NCU00631
NCU00632
NCU00633
NCU00634
NCU00635
NCU00636
NCU00638
NCU00640
NCU00641
NCU00642
NCU00643
NCU00644
NCU00645
NCU00646
NCU00648
NCU00649
NCU00650
NCU00651
NCU00652
NCU00653
NCU00654
NCU00655
NCU00656
NCU00657
NCU00658
NCU00659
NCU00660
NCU00662
NCU00663
NCU00664
NCU00665
NCU00666
NCU00667
NCU00668
NCU00669
NCU00670
NCU00671
NCU00673
NCU00674
NCU00675
NCU00676
NCU00677
NCU00678
NCU00679
NCU00680
NCU00681
NCU00682
NCU00684
NCU00685
NCU00687
NCU00688
NCU00689
NCU00690
NCU00691
NCU00692
NCU00693
NCU00694
NCU00695
NCU00696
NCU00697
NCU00698
NCU00699
NCU00700
NCU00701
NCU00704
NCU00705
NCU00706
NCU00707
NCU00708
NCU00709
NCU00710
NCU00711
NCU00712
NCU00713
NCU00714
NCU00715
NCU00716
NCU00717
NCU00718
NCU00719
NCU00720
NCU00721
NCU00722
NCU00723
NCU00724
NCU00725
NCU00726
NCU00727
NCU00728
NCU00729
NCU00730
NCU00732
NCU00733
NCU00734
NCU00735
NCU00736
NCU00737
NCU00738
NCU00739
NCU00740
NCU00741
NCU00742
NCU00743
NCU00744
NCU00745
NCU00746
NCU00747
NCU00748
NCU00749
NCU00751
NCU00752
NCU00753
NCU00754
NCU00755
NCU00756
NCU00757
NCU00758
NCU00759
NCU00760
NCU00761
NCU00762
NCU00763
NCU00764
NCU00765
NCU00766
NCU00768
NCU00770
NCU00771
NCU00772
NCU00773
NCU00774
NCU00775
NCU00776
NCU00777
NCU00778
NCU00779
NCU00780
NCU00781
NCU00782
NCU00783
NCU00784
NCU00786
NCU00787
NCU00788
NCU00789
NCU00790
NCU00792
NCU00793
NCU00794
NCU00795
NCU00796
NCU00797
NCU00798
NCU00799
NCU00800
NCU00801
NCU00802
NCU00803
NCU00804
NCU00805
NCU00806
NCU00807
NCU00808
NCU00809
NCU00810
NCU00811
NCU00812
NCU00813
NCU00814
NCU00817
NCU00818
NCU00819
NCU00821
NCU00822
NCU00823
NCU00824
NCU00825
NCU00826
NCU00827
NCU00828
NCU00829
NCU00830
NCU00831
NCU00832
NCU00833
NCU00834
NCU00835
NCU00836
NCU00837
NCU00838
NCU00839
NCU00840
NCU00841
NCU00842
NCU00843
NCU00844
NCU00845
NCU00846
NCU00847
NCU00848
NCU00849
NCU00850
NCU00851
NCU00852
NCU00853
NCU00854
NCU00855
NCU00856
NCU00857
NCU00859
NCU00860
NCU00861
NCU00862
NCU00863
NCU00864
NCU00865
NCU00866
NCU00867
NCU00868
NCU00869
NCU00870
NCU00871
NCU00872
NCU00873
NCU00874
NCU00875
NCU00876
NCU00877
NCU00878
NCU00879
NCU00880
NCU00881
NCU00882
NCU00883
NCU00884
NCU00885
NCU00886
NCU00887
NCU00889
NCU00890
NCU00891
NCU00892
NCU00893
NCU00894
NCU00895
NCU00896
NCU00897
NCU00898
NCU00899
NCU00900
NCU00901
NCU00902
NCU00903
NCU00904
NCU00905
NCU00906
NCU00907
NCU00911
NCU00912
NCU00913
NCU00914
NCU00915
NCU00916
NCU00917
NCU00918
NCU00919
NCU00920
NCU00921
NCU00922
NCU00923
NCU00924
NCU00925
NCU00926
NCU00927
NCU00928
NCU00929
NCU00930
NCU00931
NCU00932
NCU00934
NCU00935
NCU00936
NCU00937
NCU00938
NCU00939
NCU00940
NCU00941
NCU00943
NCU00944
NCU00945
NCU00946
NCU00947
NCU00948
NCU00949
NCU00950
NCU00951
NCU00952
NCU00953
NCU00954
NCU00955
NCU00956
NCU00957
NCU00958
NCU00959
NCU00960
NCU00961
NCU00962
NCU00963
NCU00964
NCU00965
NCU00966
NCU00967
NCU00968
NCU00969
NCU00970
NCU00971
NCU00972
NCU00973
NCU00974
NCU00975
NCU00976
NCU00977
NCU00978
NCU00979
NCU00980
NCU00981
NCU00983
NCU00984
NCU00985
NCU00986
NCU00987
NCU00988
NCU00989
NCU00990
NCU00992
NCU00993
NCU00994
NCU00995
NCU00998
NCU00999
NCU01000
NCU01001
NCU01002
NCU01003
NCU01004
NCU01005
NCU01006
NCU01007
NCU01008
NCU01009
NCU01010
NCU01011
NCU01012
NCU01013
NCU01014
NCU01015
NCU01016
NCU01017
NCU01019
NCU01021
NCU01022
NCU01023
NCU01024
NCU01025
NCU01026
NCU01027
NCU01032
NCU01033
NCU01034
NCU01036
NCU01038
NCU01039
NCU01041
NCU01042
NCU01043
NCU01044
NCU01045
NCU01047
NCU01048
NCU01049
NCU01050
NCU01051
NCU01052
NCU01053
NCU01054
NCU01055
NCU01056
NCU01057
NCU01058
NCU01059
NCU01060
NCU01061
NCU01063
NCU01064
NCU01065
NCU01066
NCU01067
NCU01068
NCU01069
NCU01070
NCU01071
NCU01072
NCU01073
NCU01074
NCU01075
NCU01076
NCU01077
NCU01078
NCU01079
NCU01080
NCU01081
NCU01082
NCU01083
NCU01084
NCU01085
NCU01086
NCU01087
NCU01088
NCU01089
NCU01090
NCU01091
NCU01092
NCU01093
NCU01094
NCU01095
NCU01096
NCU01097
NCU01098
NCU01099
NCU01100
NCU01101
NCU01102
NCU01103
NCU01104
NCU01105
NCU01106
NCU01107
NCU01108
NCU01109
NCU01111
NCU01112
NCU01113
NCU01114
NCU01115
NCU01116
NCU01118
NCU01119
NCU01120
NCU01121
NCU01122
NCU01123
NCU01124
NCU01127
NCU01132
NCU01134
NCU01135
NCU01136
NCU01138
NCU01140
NCU01141
NCU01142
NCU01143
NCU01144
NCU01145
NCU01146
NCU01147
NCU01148
NCU01149
NCU01150
NCU01151
NCU01153
NCU01154
NCU01156
NCU01157
NCU01158
NCU01159
NCU01160
NCU01161
NCU01162
NCU01163
NCU01164
NCU01165
NCU01166
NCU01167
NCU01169
NCU01170
NCU01171
NCU01172
NCU01173
NCU01174
NCU01175
NCU01176
NCU01177
NCU01178
NCU01179
NCU01180
NCU01181
NCU01182
NCU01183
NCU01184
NCU01185
NCU01186
NCU01187
NCU01188
NCU01189
NCU01190
NCU01191
NCU01192
NCU01193
NCU01195
NCU01196
NCU01197
NCU01198
NCU01199
NCU01200
NCU01201
NCU01202
NCU01203
NCU01204
NCU01205
NCU01206
NCU01207
NCU01208
NCU01209
NCU01210
NCU01211
NCU01212
NCU01213
NCU01214
NCU01215
NCU01216
NCU01218
NCU01219
NCU01220
NCU01221
NCU01223
NCU01224
NCU01225
NCU01227
NCU01229
NCU01230
NCU01231
NCU01233
NCU01234
NCU01235
NCU01236
NCU01238
NCU01240
NCU01241
NCU01242
NCU01243
NCU01245
NCU01246
NCU01247
NCU01248
NCU01249
NCU01250
NCU01252
NCU01253
NCU01254
NCU01255
NCU01256
NCU01257
NCU01258
NCU01259
NCU01260
NCU01261
NCU01262
NCU01266
NCU01267
NCU01268
NCU01269
NCU01270
NCU01271
NCU01272
NCU01273
NCU01274
NCU01275
NCU01276
NCU01277
NCU01278
NCU01279
NCU01281
NCU01282
NCU01283
NCU01284
NCU01285
NCU01288
NCU01289
NCU01290
NCU01291
NCU01292
NCU01294
NCU01296
NCU01297
NCU01298
NCU01299
NCU01300
NCU01301
NCU01302
NCU01303
NCU01304
NCU01305
NCU01306
NCU01307
NCU01308
NCU01309
NCU01310
NCU01311
NCU01312
NCU01313
NCU01314
NCU01315
NCU01317
NCU01318
NCU01319
NCU01320
NCU01321
NCU01322
NCU01323
NCU01324
NCU01325
NCU01326
NCU01327
NCU01328
NCU01329
NCU01330
NCU01331
NCU01332
NCU01333
NCU01334
NCU01335
NCU01336
NCU01337
NCU01338
NCU01339
NCU01340
NCU01341
NCU01342
NCU01343
NCU01344
NCU01345
NCU01346
NCU01347
NCU01348
NCU01349
NCU01350
NCU01351
NCU01353
NCU01355
NCU01356
NCU01357
NCU01358
NCU01360
NCU01361
NCU01362
NCU01364
NCU01365
NCU01366
NCU01367
NCU01368
NCU01369
NCU01370
NCU01371
NCU01373
NCU01374
NCU01375
NCU01376
NCU01377
NCU01378
NCU01379
NCU01380
NCU01381
NCU01382
NCU01383
NCU01385
NCU01386
NCU01387
NCU01388
NCU01389
NCU01390
NCU01391
NCU01392
NCU01393
NCU01394
NCU01395
NCU01396
NCU01397
NCU01398
NCU01399
NCU01400
NCU01401
NCU01402
NCU01403
NCU01404
NCU01407
NCU01408
NCU01409
NCU01410
NCU01411
NCU01412
NCU01413
NCU01414
NCU01415
NCU01416
NCU01417
NCU01418
NCU01419
NCU01420
NCU01421
NCU01422
NCU01423
NCU01424
NCU01425
NCU01426
NCU01427
NCU01428
NCU01429
NCU01430
NCU01431
NCU01432
NCU01433
NCU01434
NCU01435
NCU01436
NCU01438
NCU01439
NCU01440
NCU01441
NCU01442
NCU01443
NCU01444
NCU01445
NCU01446
NCU01447
NCU01448
NCU01449
NCU01450
NCU01451
NCU01452
NCU01453
NCU01454
NCU01455
NCU01456
NCU01457
NCU01458
NCU01459
NCU01460
NCU01461
NCU01462
NCU01463
NCU01464
NCU01465
NCU01466
NCU01467
NCU01468
NCU01469
NCU01470
NCU01471
NCU01472
NCU01473
NCU01474
NCU01475
NCU01476
NCU01477
NCU01478
NCU01479
NCU01480
NCU01481
NCU01483
NCU01484
NCU01485
NCU01486
NCU01487
NCU01488
NCU01489
NCU01490
NCU01491
NCU01493
NCU01494
NCU01495
NCU01496
NCU01498
NCU01499
NCU01500
NCU01501
NCU01502
NCU01503
NCU01504
NCU01505
NCU01506
NCU01509
NCU01510
NCU01511
NCU01512
NCU01514
NCU01515
NCU01516
NCU01517
NCU01519
NCU01520
NCU01521
NCU01522
NCU01523
NCU01524
NCU01525
NCU01526
NCU01527
NCU01528
NCU01529
NCU01530
NCU01531
NCU01532
NCU01534
NCU01535
NCU01536
NCU01539
NCU01540
NCU01541
NCU01542
NCU01543
NCU01545
NCU01546
NCU01547
NCU01548
NCU01549
NCU01550
NCU01551
NCU01552
NCU01553
NCU01554
NCU01555
NCU01559
NCU01560
NCU01561
NCU01562
NCU01563
NCU01564
NCU01565
NCU01566
NCU01567
NCU01568
NCU01569
NCU01570
NCU01571
NCU01572
NCU01573
NCU01575
NCU01577
NCU01579
NCU01580
NCU01581
NCU01584
NCU01585
NCU01587
NCU01589
NCU01591
NCU01592
NCU01593
NCU01595
NCU01596
NCU01597
NCU01598
NCU01599
NCU01601
NCU01605
NCU01606
NCU01607
NCU01608
NCU01610
NCU01611
NCU01612
NCU01613
NCU01614
NCU01615
NCU01620
NCU01623
NCU01625
NCU01629
NCU01631
NCU01632
NCU01633
NCU01634
NCU01635
NCU01636
NCU01637
NCU01638
NCU01640
NCU01642
NCU01643
NCU01644
NCU01645
NCU01646
NCU01647
NCU01648
NCU01649
NCU01650
NCU01651
NCU01652
NCU01653
NCU01654
NCU01655
NCU01656
NCU01657
NCU01658
NCU01659
NCU01660
NCU01664
NCU01665
NCU01666
NCU01667
NCU01668
NCU01669
NCU01670
NCU01672
NCU01673
NCU01674
NCU01675
NCU01678
NCU01679
NCU01680
NCU01681
NCU01684
NCU01686
NCU01688
NCU01689
NCU01692
NCU01695
NCU01696
NCU01697
NCU01698
NCU01699
NCU01700
NCU01701
NCU01702
NCU01703
NCU01704
NCU01705
NCU01706
NCU01713
NCU01715
NCU01717
NCU01720
NCU01722
NCU01724
NCU01725
NCU01728
NCU01729
NCU01731
NCU01734
NCU01735
NCU01737
NCU01738
NCU01739
NCU01740
NCU01741
NCU01742
NCU01744
NCU01745
NCU01746
NCU01747
NCU01748
NCU01750
NCU01751
NCU01752
NCU01753
NCU01754
NCU01756
NCU01757
NCU01758
NCU01759
NCU01760
NCU01761
NCU01762
NCU01763
NCU01764
NCU01765
NCU01766
NCU01767
NCU01768
NCU01769
NCU01771
NCU01772
NCU01776
NCU01777
NCU01779
NCU01780
NCU01781
NCU01782
NCU01783
NCU01784
NCU01785
NCU01786
NCU01788
NCU01789
NCU01790
NCU01791
NCU01792
NCU01793
NCU01794
NCU01795
NCU01796
NCU01797
NCU01798
NCU01799
NCU01800
NCU01801
NCU01802
NCU01803
NCU01804
NCU01805
NCU01806
NCU01807
NCU01808
NCU01809
NCU01810
NCU01811
NCU01812
NCU01813
NCU01814
NCU01815
NCU01816
NCU01817
NCU01818
NCU01819
NCU01820
NCU01821
NCU01822
NCU01823
NCU01824
NCU01826
NCU01827
NCU01828
NCU01829
NCU01830
NCU01831
NCU01833
NCU01834
NCU01835
NCU01837
NCU01838
NCU01839
NCU01840
NCU01841
NCU01842
NCU01843
NCU01844
NCU01845
NCU01846
NCU01848
NCU01849
NCU01850
NCU01851
NCU01852
NCU01853
NCU01854
NCU01855
NCU01856
NCU01857
NCU01858
NCU01859
NCU01860
NCU01861
NCU01862
NCU01863
NCU01865
NCU01866
NCU01867
NCU01868
NCU01869
NCU01870
NCU01871
NCU01872
NCU01873
NCU01874
NCU01875
NCU01876
NCU01877
NCU01878
NCU01879
NCU01880
NCU01881
NCU01882
NCU01883
NCU01884
NCU01886
NCU01888
NCU01889
NCU01891
NCU01893
NCU01894
NCU01895
NCU01896
NCU01897
NCU01898
NCU01899
NCU01900
NCU01901
NCU01902
NCU01903
NCU01904
NCU01905
NCU01906
NCU01907
NCU01908
NCU01910
NCU01911
NCU01912
NCU01913
NCU01914
NCU01916
NCU01917
NCU01918
NCU01919
NCU01920
NCU01922
NCU01923
NCU01924
NCU01926
NCU01927
NCU01928
NCU01929
NCU01930
NCU01931
NCU01932
NCU01935
NCU01936
NCU01938
NCU01939
NCU01940
NCU01942
NCU01943
NCU01944
NCU01945
NCU01946
NCU01947
NCU01948
NCU01949
NCU01950
NCU01951
NCU01953
NCU01954
NCU01955
NCU01956
NCU01957
NCU01958
NCU01959
NCU01960
NCU01961
NCU01962
NCU01963
NCU01964
NCU01965
NCU01966
NCU01967
NCU01968
NCU01969
NCU01970
NCU01971
NCU01972
NCU01973
NCU01974
NCU01975
NCU01976
NCU01977
NCU01978
NCU01979
NCU01980
NCU01981
NCU01982
NCU01983
NCU01984
NCU01985
NCU01987
NCU01988
NCU01989
NCU01990
NCU01991
NCU01992
NCU01993
NCU01994
NCU01995
NCU01996
NCU01997
NCU01998
NCU01999
NCU02000
NCU02001
NCU02002
NCU02003
NCU02004
NCU02005
NCU02006
NCU02007
NCU02008
NCU02009
NCU02010
NCU02011
NCU02012
NCU02013
NCU02014
NCU02015
NCU02016
NCU02017
NCU02018
NCU02019
NCU02020
NCU02021
NCU02022
NCU02023
NCU02024
NCU02025
NCU02026
NCU02027
NCU02028
NCU02029
NCU02030
NCU02031
NCU02032
NCU02033
NCU02034
NCU02035
NCU02036
NCU02037
NCU02038
NCU02039
NCU02040
NCU02041
NCU02042
NCU02043
NCU02044
NCU02046
NCU02048
NCU02049
NCU02051
NCU02052
NCU02053
NCU02054
NCU02055
NCU02056
NCU02057
NCU02058
NCU02059
NCU02060
NCU02061
NCU02062
NCU02063
NCU02064
NCU02065
NCU02066
NCU02067
NCU02068
NCU02070
NCU02071
NCU02073
NCU02074
NCU02075
NCU02076
NCU02077
NCU02078
NCU02079
NCU02080
NCU02081
NCU02082
NCU02083
NCU02084
NCU02085
NCU02086
NCU02087
NCU02088
NCU02089
NCU02090
NCU02091
NCU02092
NCU02094
NCU02095
NCU02096
NCU02097
NCU02098
NCU02099
NCU02100
NCU02101
NCU02103
NCU02104
NCU02105
NCU02106
NCU02107
NCU02108
NCU02109
NCU02110
NCU02111
NCU02112
NCU02113
NCU02114
NCU02115
NCU02116
NCU02117
NCU02118
NCU02119
NCU02120
NCU02121
NCU02122
NCU02123
NCU02124
NCU02125
NCU02126
NCU02127
NCU02128
NCU02129
NCU02130
NCU02131
NCU02132
NCU02133
NCU02134
NCU02136
NCU02137
NCU02138
NCU02139
NCU02142
NCU02143
NCU02144
NCU02145
NCU02146
NCU02147
NCU02148
NCU02149
NCU02150
NCU02151
NCU02152
NCU02153
NCU02155
NCU02156
NCU02157
NCU02158
NCU02159
NCU02160
NCU02161
NCU02162
NCU02163
NCU02164
NCU02165
NCU02167
NCU02168
NCU02169
NCU02170
NCU02171
NCU02172
NCU02173
NCU02174
NCU02175
NCU02176
NCU02177
NCU02178
NCU02179
NCU02181
NCU02182
NCU02183
NCU02184
NCU02187
NCU02188
NCU02189
NCU02190
NCU02191
NCU02192
NCU02193
NCU02194
NCU02195
NCU02196
NCU02197
NCU02198
NCU02199
NCU02200
NCU02201
NCU02202
NCU02203
NCU02204
NCU02205
NCU02206
NCU02207
NCU02208
NCU02209
NCU02211
NCU02212
NCU02213
NCU02214
NCU02215
NCU02216
NCU02217
NCU02218
NCU02219
NCU02220
NCU02221
NCU02222
NCU02223
NCU02224
NCU02225
NCU02226
NCU02227
NCU02228
NCU02229
NCU02230
NCU02231
NCU02232
NCU02233
NCU02234
NCU02235
NCU02236
NCU02237
NCU02238
NCU02239
NCU02240
NCU02241
NCU02242
NCU02243
NCU02244
NCU02245
NCU02246
NCU02247
NCU02248
NCU02249
NCU02250
NCU02251
NCU02252
NCU02253
NCU02254
NCU02255
NCU02256
NCU02257
NCU02258
NCU02259
NCU02260
NCU02261
NCU02262
NCU02263
NCU02264
[truncated: 7,729 more rows]
