# Supplementary material for: The nutrient-sensing GCN2 signaling pathway is essential for circadian clock function by regulating histone acetylation under amino acid starvation
Source: eLife. 2023 Apr 21;12:e85241. doi: 10.7554/eLife.85241 (PMC10191625; doi:10.7554/eLife.85241)
Supplement: Supplementary file 2. [file elife-85241-supp2.xlsx]

## Sheet: summary
Supplementary file 2. Rhythmic analyses by CircaCompare
Sheet 1 - CircaCompare analyses - rhythm of FRQ protein in WT and cpc-3ko (3 mM 3-AT) - Figure 1C
Sheet 2 - CircaCompare analyses - rhythm of FRQ protein in WT and cpc-1ko (3 mM 3-AT) - Figure 1C
Sheet 3 - CircaCompare analyses - rhythm of FRQ protein in WT and cpc-3ko (0 mM 3-AT) - Figure 1–figure supplement 2C
Sheet 4 - CircaCompare analyses - rhythm of FRQ protein in WT and cpc-1ko (0 mM 3-AT) - Figure 1–figure supplement 2C
Sheet 5 - CircaCompare analyses - rhythm of frq mRNA in WT and cpc-3ko (3 mM 3-AT) - Figure 1D
Sheet 6 - CircaCompare analyses - H2B occupancy in WT and cpc-1ko (3 mM 3-AT) - Figure 3C
Sheet 7 - CircaCompare analyses - rhythm of FRQ protein in WT and gcn-5ko (0 mM 3-AT) - Figure 5C
Sheet 8 - CircaCompare analyses - WC-2 enrichment in WT and gcn-5ko (0 mM 3-AT) - Figure 5G
Sheet 9 - CircaCompare analyses - rhythm of frq mRNA in WT and cpc-1ko (0 mM 3-AT) - Figure 1–figure supplement 2D
Sheet 10 - CircaCompare analyses - rhythm of frq mRNA in WT and cpc-3ko (0 mM 3-AT) - Figure 1–figure supplement 2D
Sheet 11 - CircaCompare analyses - WC-2 enrichment in WT and cpc-1ko (0 mM 3-AT) - Figure 2–figure supplement 1A
Sheet 12 - CircaCompare analyses - WC-2 enrichment in WT and cpc-3ko (0 mM 3-AT) - Figure 2–figure supplement 1A
Sheet 13 - CircaCompare analyses - rhythm of FRQ protein in WT and ada-2ko (0 mM 3-AT) - Figure 5–figure supplement 1D
Sheet 14 - CircaCompare analyses - rhythm of frq mRNA in WT and ada-2ko (0 mM 3-AT) - Figure 5–figure supplement 1E
Sheet 15 - CircaCompare analyses - rhythm of frq mRNA in WT and ada-2ko (3 mM 3-AT) - Figure 5–figure supplement 1F
Sheet 16 - CircaCompare analyses - rhythm of ser-2 mRNA in WT and cpc-1ko (0 mM 3-AT) - Figure 7–figure supplement 1E
Sheet 17 - CircaCompare analyses - rhythm of trp-3 mRNA in WT and cpc-1ko (0 mM 3-AT) - Figure 7–figure supplement 1E
Sheet 18 - CircaCompare analyses - exclusive rhythm of WT

## Sheet: Sheet 1
FRQ protein rhythm (3 mM 3-AT) - WT VS cpc-3ko
parameter	value
Presence of rhythmicity (p-value) for cpc-3	0.00161171
Presence of rhythmicity (p-value) for WT	4.99789e-08
cpc-3 mesor estimate	0.388001
WT mesor estimate	0.327094
Mesor difference estimate	-0.0609066
P-value for mesor difference	0.142125
cpc-3 amplitude estimate	0.14914
WT amplitude estimate	0.251173
Amplitude difference estimate	0.102034
P-value for amplitude difference	0.0774038
cpc-3 peak time hours	2.41139
WT peak time hours	1.43112
Phase difference estimate	-0.980275
P-value for difference in phase	0.431931
Shared period estimate	24

## Sheet: Sheet 2
FRQ protein rhythm (3 mM 3-AT) - WT VS cpc-1ko
parameter	value
Presence of rhythmicity (p-value) for cpc-1	0.00042992
Presence of rhythmicity (p-value) for WT	4.99789e-08
cpc-1 mesor estimate	0.247618
WT mesor estimate	0.327094
Mesor difference estimate	0.0794762
P-value for mesor difference	0.0614052
cpc-1 amplitude estimate	0.174793
WT amplitude estimate	0.251173
Amplitude difference estimate	0.0763799
P-value for amplitude difference	0.191975
cpc-1 peak time hours	2.30949
WT peak time hours	1.43112
Phase difference estimate	-0.878378
P-value for difference in phase	0.44045
Shared period estimate	24

## Sheet: Sheet 3
FRQ protein rhythm (0 mM 3-AT) - WT VS cpc-3ko
parameter	value
Presence of rhythmicity (p-value) for cpc-3	0.000281339
Presence of rhythmicity (p-value) for WT	4.49001e-05
cpc-3 mesor estimate	0.388144
WT mesor estimate	0.347601
Mesor difference estimate	-0.0405429
P-value for mesor difference	0.392286
cpc-3 amplitude estimate	0.19715
WT amplitude estimate	0.194128
Amplitude difference estimate	-0.00302175
P-value for amplitude difference	0.962707
cpc-3 peak time hours	1.08647
WT peak time hours	23.7317
Phase difference estimate	-1.35473
P-value for difference in phase	0.316397
Shared period estimate	24

## Sheet: Sheet 4
FRQ protein rhythm (0 mM 3-AT) - WT VS cpc-1ko
parameter	value
Presence of rhythmicity (p-value) for cpc-1	0.00172106
Presence of rhythmicity (p-value) for WT	4.49001e-05
cpc-1 mesor estimate	0.339816
WT mesor estimate	0.347601
Mesor difference estimate	0.00778506
P-value for mesor difference	0.85622
cpc-1 amplitude estimate	0.139043
WT amplitude estimate	0.194128
Amplitude difference estimate	0.0550846
P-value for amplitude difference	0.350515
cpc-1 peak time hours	1.33934
WT peak time hours	23.7317
Phase difference estimate	-1.60759
P-value for difference in phase	0.284065
Shared period estimate	24

## Sheet: Sheet 5
frq mRNA rhythm (3 mM 3-AT) - WT VS cpc-3ko
parameter	value
Presence of rhythmicity (p-value) for cpc3	0.00389451
Presence of rhythmicity (p-value) for WT	6.56088e-05
cpc3 mesor estimate	0.30408
WT mesor estimate	0.386645
Mesor difference estimate	0.0825647
P-value for mesor difference	0.115324
cpc3 amplitude estimate	0.168131
WT amplitude estimate	0.226899
Amplitude difference estimate	0.0587678
P-value for amplitude difference	0.431554
cpc3 peak time hours	21.2593
WT peak time hours	18.6706
Phase difference estimate	-2.58871
P-value for difference in phase	0.0787747
Shared period estimate	24

## Sheet: Sheet 6
H2B-ChIP (3 mM 3-AT) - WT VS cpc-1ko
parameter	value
Presence of rhythmicity (p-value) for cpc1	0.0364051
Presence of rhythmicity (p-value) for WT	0.000384746
cpc1 mesor estimate	0.236495
WT mesor estimate	0.305442
Mesor difference estimate	0.0689467
P-value for mesor difference	0.0312252
cpc1 amplitude estimate	0.0677677
WT amplitude estimate	0.116234
Amplitude difference estimate	0.0484664
P-value for amplitude difference	0.215538
cpc1 peak time hours	8.27649
WT peak time hours	6.18552
Phase difference estimate	-2.09096
P-value for difference in phase	0.299501
Shared period estimate	24

## Sheet: Sheet 7
FRQ protein rhythm (0 mM 3-AT) - WT VS gcn-5ko
parameter	value
Presence of rhythmicity (p-value) for gcn5	0.00161171
Presence of rhythmicity (p-value) for WT	4.99789e-08
gcn-5 mesor estimate	0.388001
WT mesor estimate	0.327094
Mesor difference estimate	-0.0609066
P-value for mesor difference	0.142125
gcn-5 amplitude estimate	0.14914
WT amplitude estimate	0.251173
Amplitude difference estimate	0.102034
P-value for amplitude difference	0.0774038
gcn-5 peak time hours	2.41139
WT peak time hours	1.43112
Phase difference estimate	-0.980275
P-value for difference in phase	0.431931
Shared period estimate	24

## Sheet: Sheet 8
WC-2-ChIP (0 mM 3-AT) - WT VS gcn-5ko
parameter	value
Presence of rhythmicity (p-value) for gcn-5	0.0458833
Presence of rhythmicity (p-value) for WT	0.000339422
gcn-5 mesor estimate	0.0579444
WT mesor estimate	0.0861991
Mesor difference estimate	0.0282547
P-value for mesor difference	0.293883
gcn-5 amplitude estimate	0.0431224
WT amplitude estimate	0.208995
Amplitude difference estimate	0.165872
P-value for amplitude difference	0.000951444
gcn-5 peak time hours	15.5841
WT peak time hours	14.9751
Phase difference estimate	-0.608981
P-value for difference in phase	0.693284
Shared period estimate	24

## Sheet: Sheet 9
frq mRNA rhythm (0 mM 3-AT) - WT VS cpc-1ko
parameter	value
Presence of rhythmicity (p-value) for cpc-1	0.00305073
Presence of rhythmicity (p-value) for WT	0.0153224
cpc-1 mesor estimate	0.286792
WT mesor estimate	0.366687
Mesor difference estimate	0.0798955
P-value for mesor difference	0.111318
cpc-1 amplitude estimate	0.149902
WT amplitude estimate	0.135169
Amplitude difference estimate	-0.014733
P-value for amplitude difference	0.836005
cpc-1 peak time hours	21.5601
WT peak time hours	18.5899
Phase difference estimate	-2.97019
P-value for difference in phase	0.114475
Shared period estimate	24

[truncated: 9 more sheets: Sheet 10, Sheet 11, Sheet 12, Sheet 13, Sheet 14, Sheet 15, Sheet 16, Sheet 17, Sheet 18]
