# Supplementary figures and images for: The nutrient-sensing GCN2 signaling pathway is essential for circadian clock function by regulating histone acetylation under amino acid starvation
Source: eLife journal article supplement (doi:10.7554/elife.85241), 2023-04-21

WT

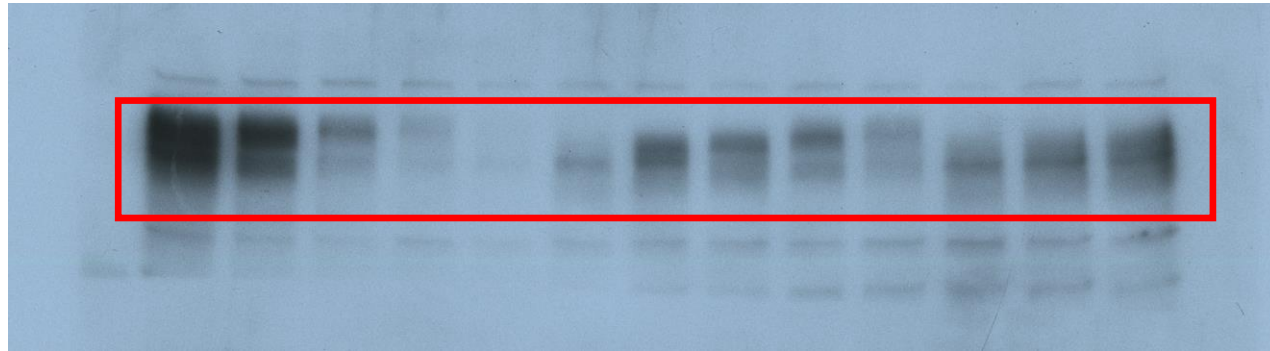

*cpc-3*<sup>ko</sup>

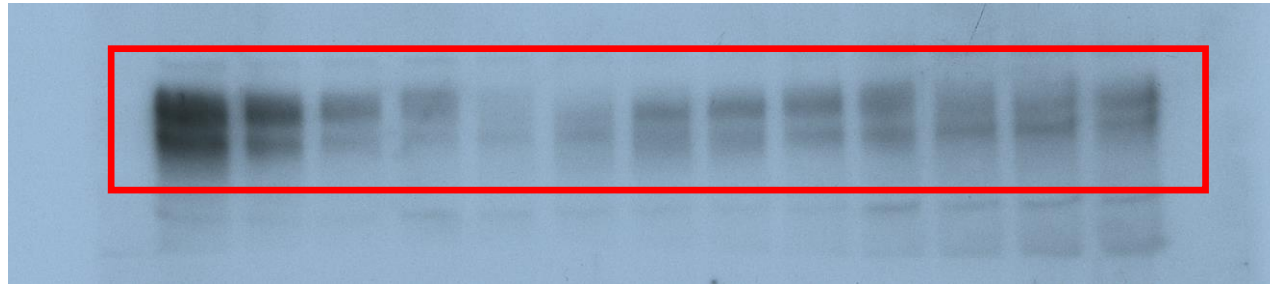

*cpc-1*<sup>ko</sup>

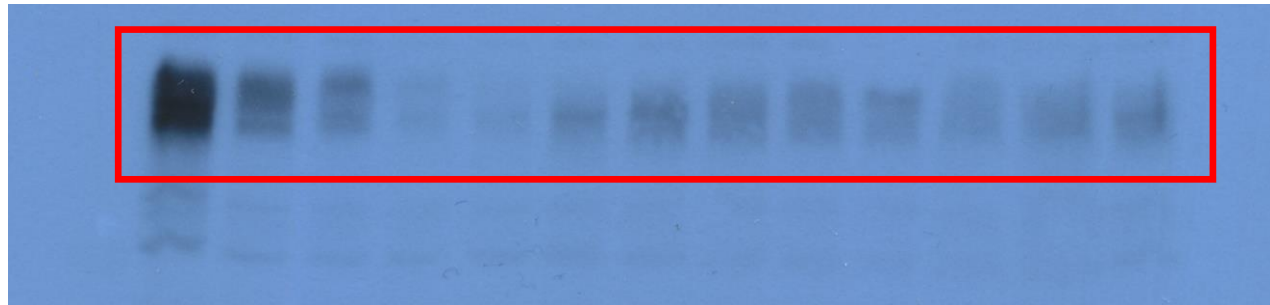

Supplement: fig1-data2 [file elife-85241-fig1-data2-v2.zip]

## Northern

## Gel

WT

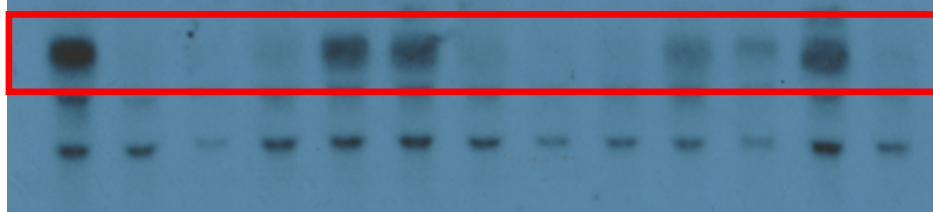

*cpc-3*<sup>ko</sup>

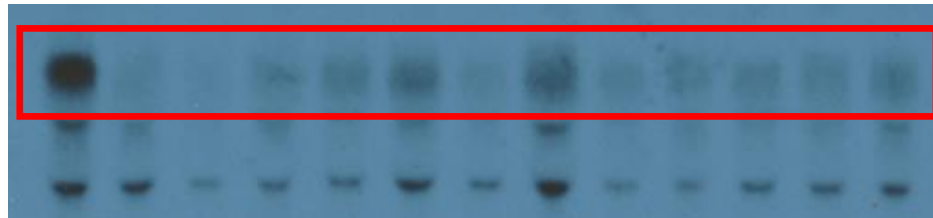

*cpc-1*<sup>ko</sup>

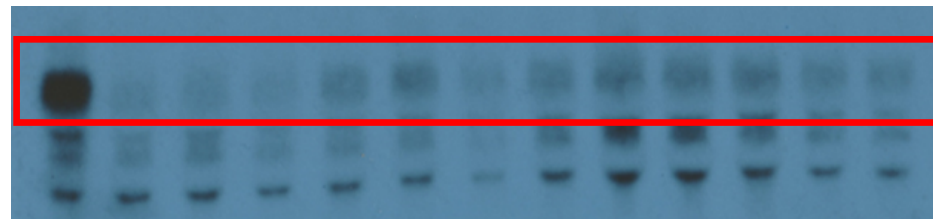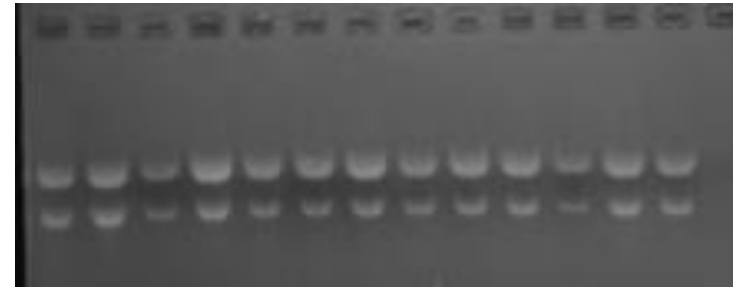

WT

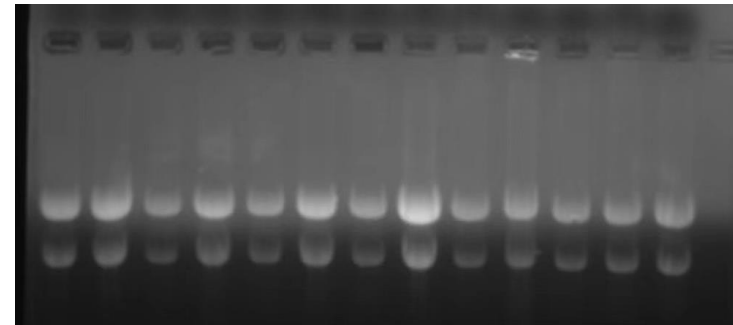

*cpc-3*<sup>ko</sup>

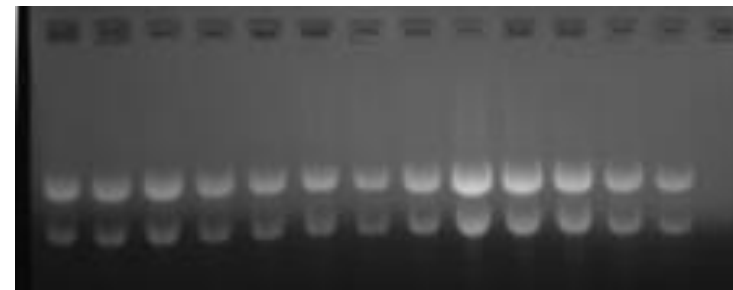

*cpc-1*<sup>ko</sup>

Supplement: fig1-data3 [file Figure 1-source data 3-1.pdf › Figure 1-source data 3/Figure 1-source data 3-1.pdf]

P-eIF2 $\alpha$

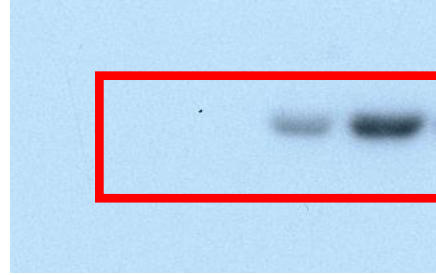

membrane

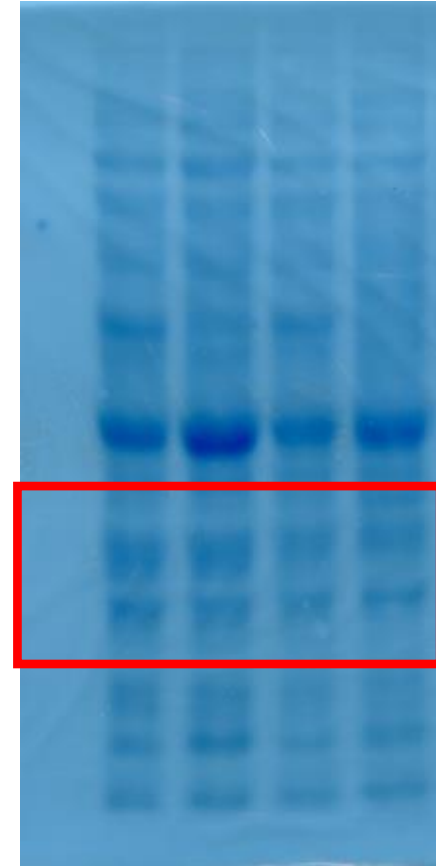

CPC-1

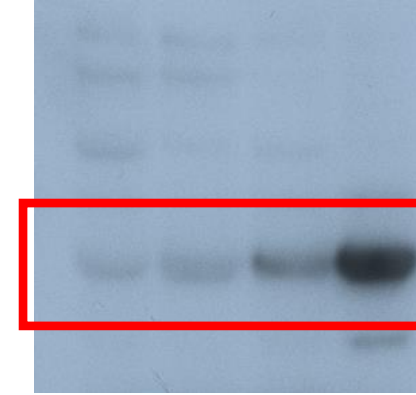

membrane

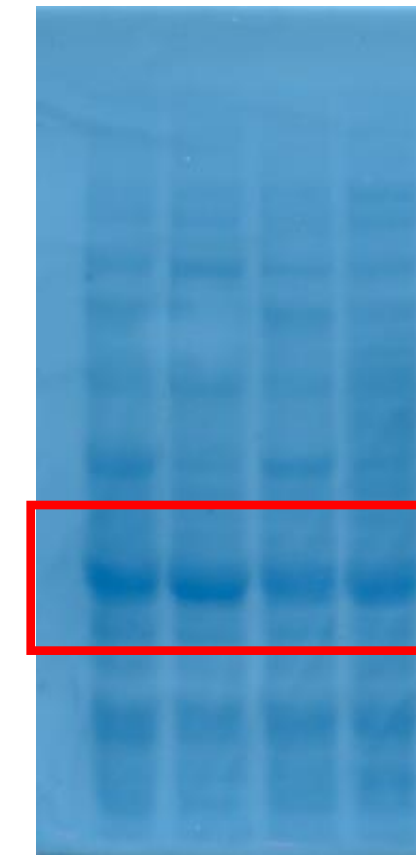

Supplement: fig1-figsupp1-data1 [file Figure 1-figure supplement 1-source data 1.pdf › Figure 1-figure supplement 1-source data 1/Figure 1-figure supplement 1-source data 1.pdf]

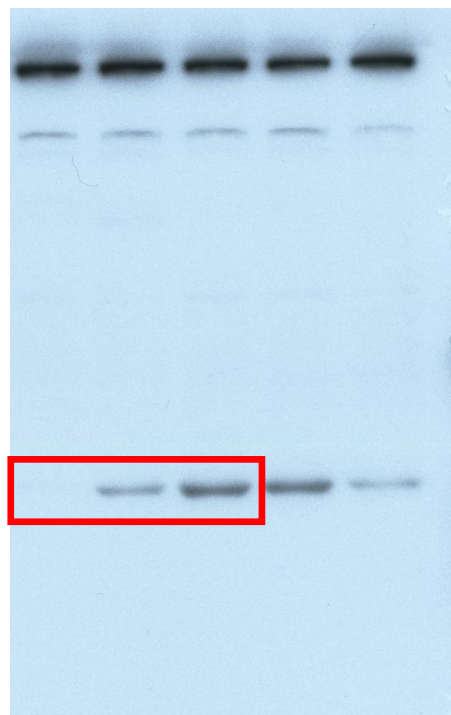

CPC-1

Membrane

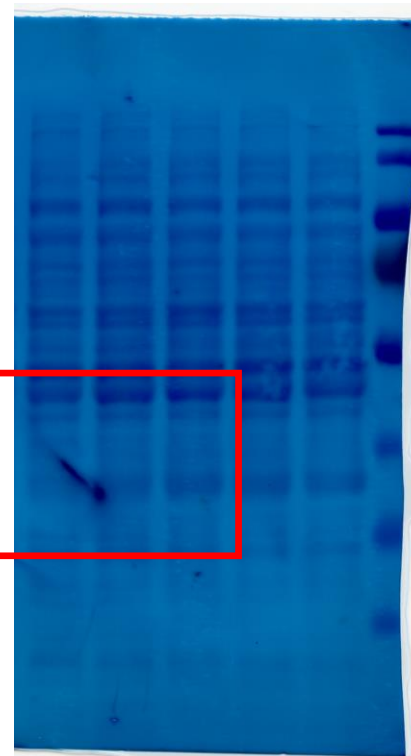

Supplement: fig1-figsupp1-data2 [file Figure 1-figure supplement 1-source data 2.pdf › Figure 1-figure supplement 1-source data 2/Figure 1-figure supplement 1-source data 2.pdf]

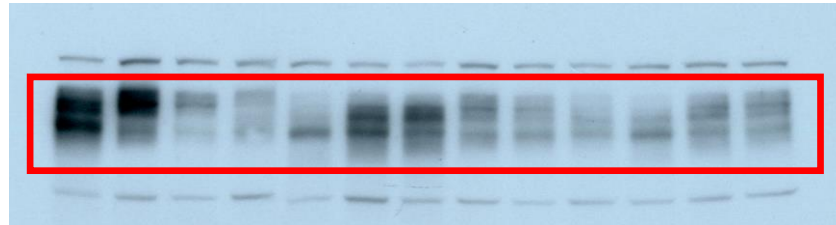

WT

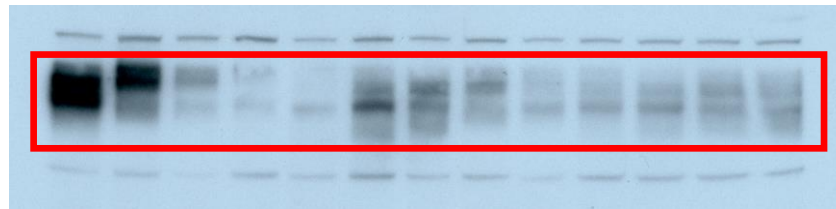

*cpc-3<sup>ko</sup>*

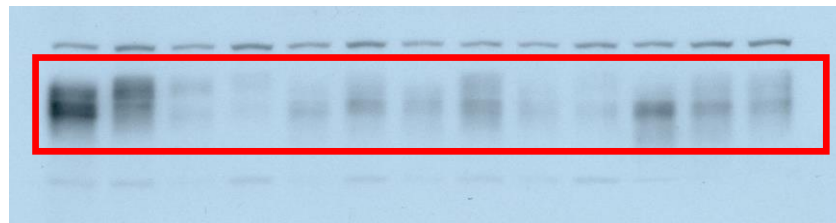

*cpc-1<sup>ko</sup>*

Supplement: fig1-figsupp2-data3 [file Figure 1-figure supplement 2-source data 3-1.pdf › Figure 1-figure supplement 2-source data 3/Figure 1-figure supplement 2-source data 3-1.pdf]

Northern

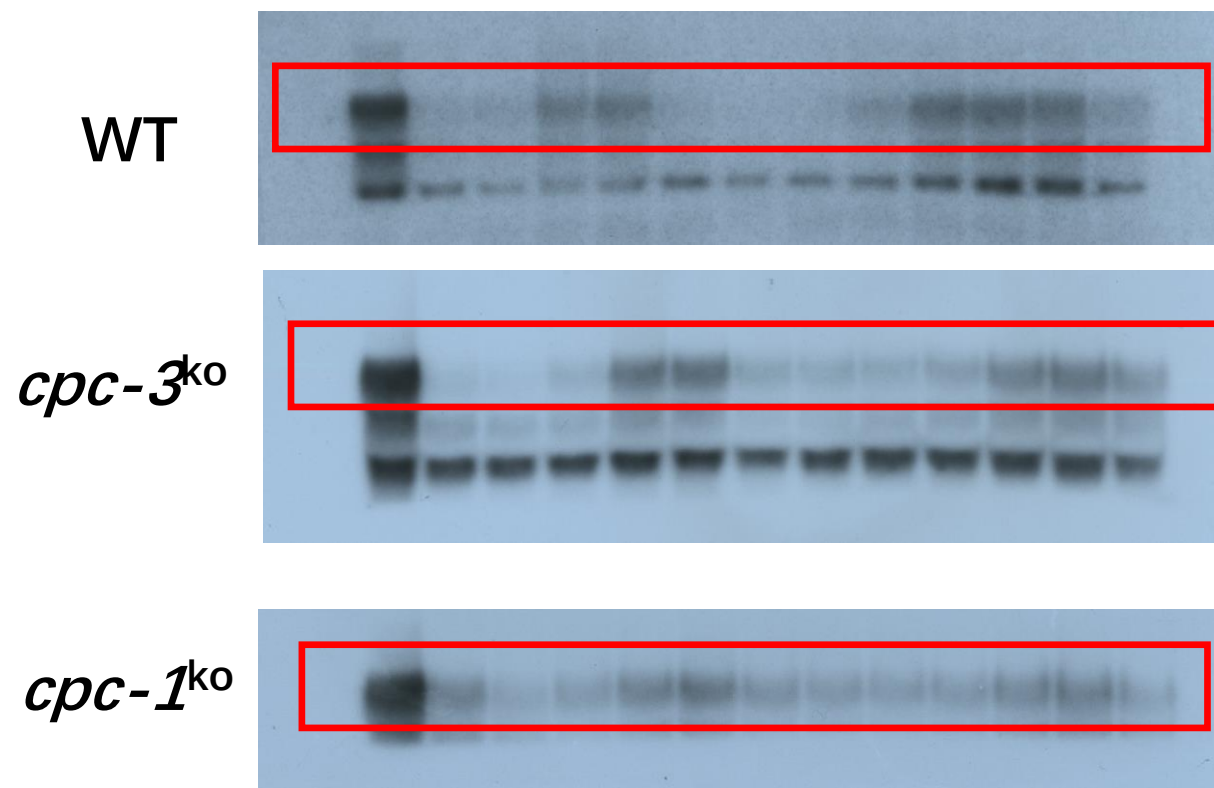

Gel

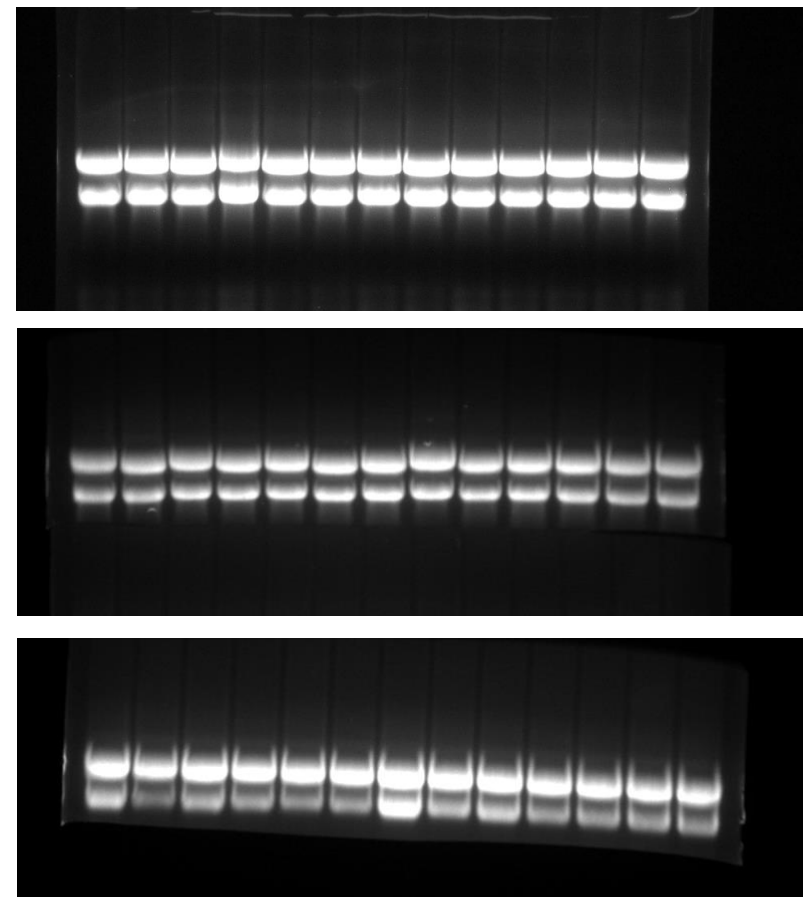

Supplement: fig1-figsupp2-data4 [file Figure 1-figure supplement 2-source data 4-1.pdf › Figure 1-figure supplement 2-source data 4/Figure 1-figure supplement 2-source data 4-1.pdf]

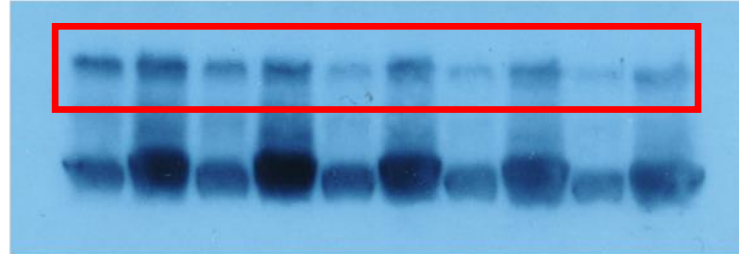

WC-1

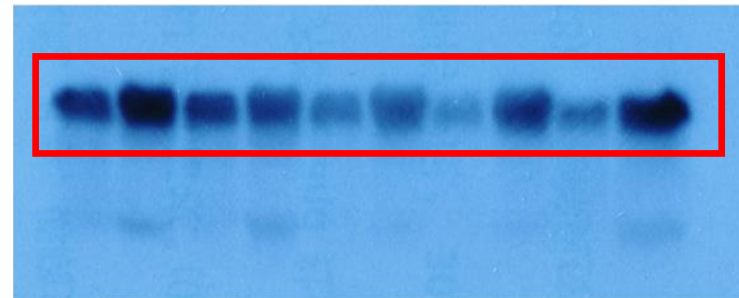

WC-2

Supplement: fig2-data2 [file Figure 2-source data 2.pdf › Figure 2-source data 2/Figure 2-source data 2.pdf]

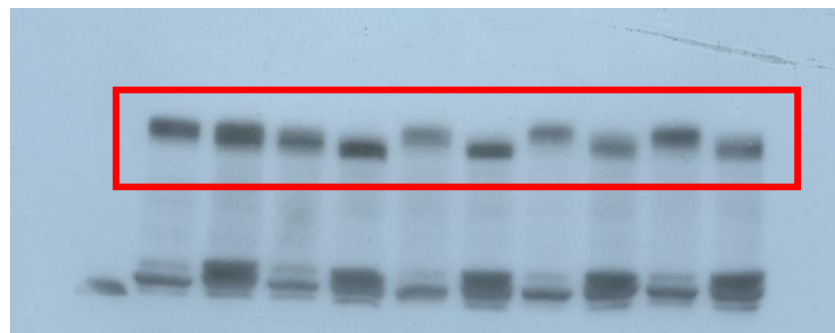

P-WC-1

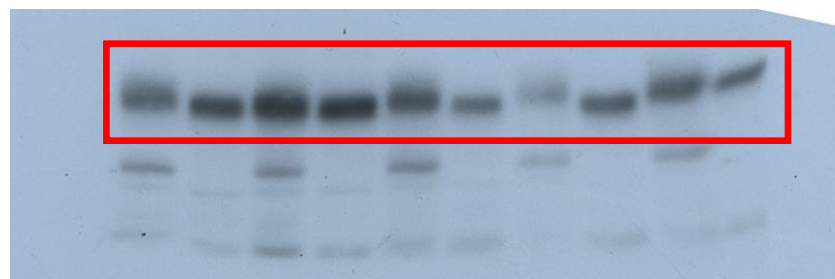

P-WC-2

Supplement: fig2-figsupp1-data2 [file Figure 2-figure supplement 1-source data 2.pdf › Figure 2-figure supplement 1-source data 2/Figure 2-figure supplement 1-source data 2.pdf]

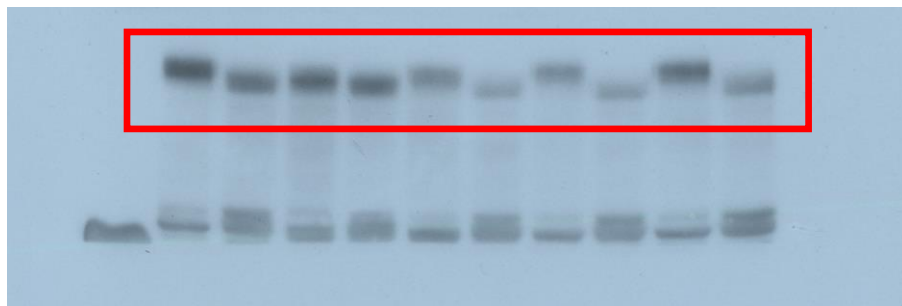

P-WC-1

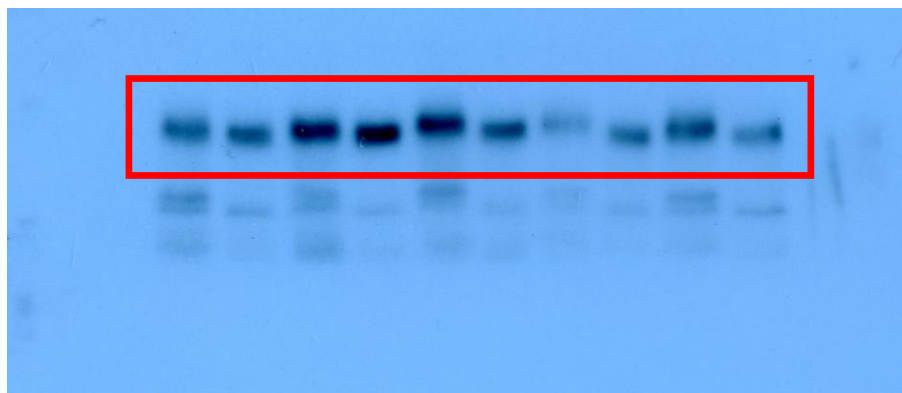

P-WC-2

Supplement: fig2-figsupp1-data3 [file Figure 2-figure supplement 1-source data 3.pdf › Figure 2-figure supplement 1-source data 3/Figure 2-figure supplement 1-source data 3.pdf]

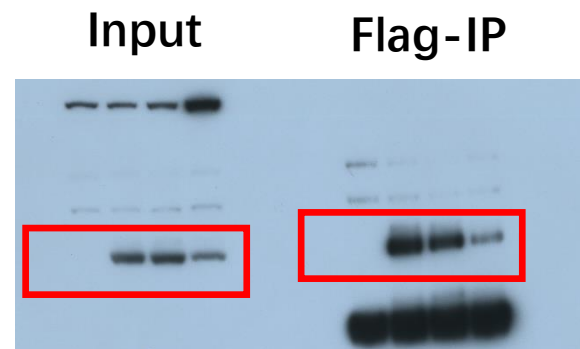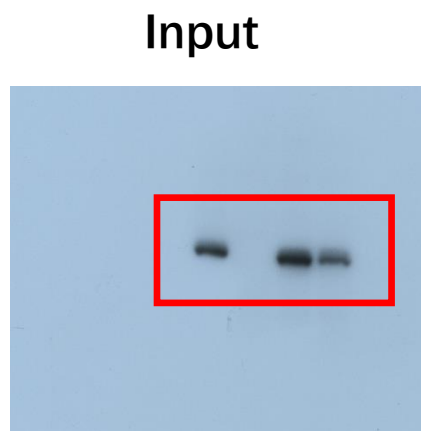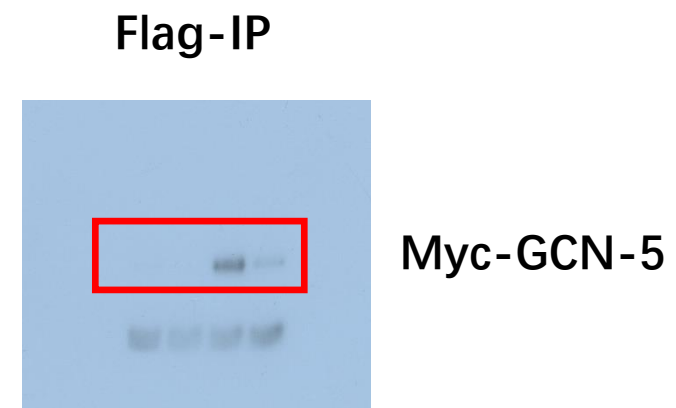

Supplement: fig4-data2 [file elife-85241-fig4-data2-v2.zip]

Input

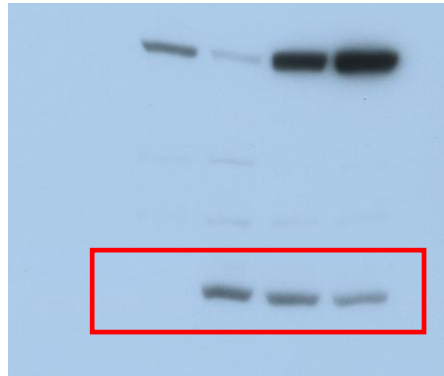

Flag-IP

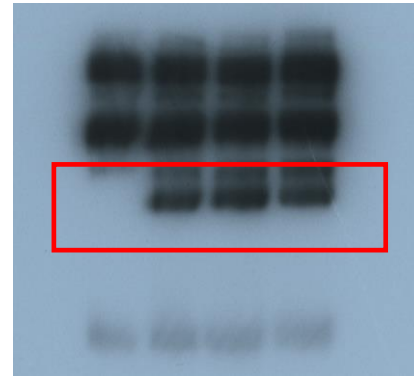

Flag-ADA-2

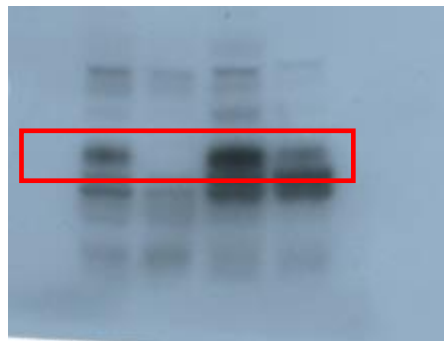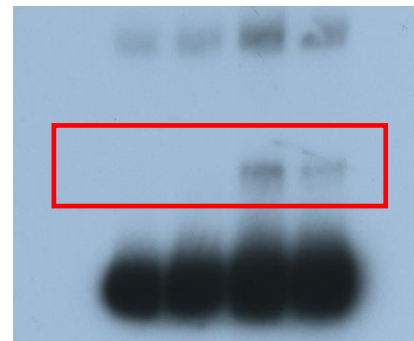

Myc-CPC-1

Supplement: fig4-data3 [file Figure 4-source data 3.pdf › Figure 4-source data 3/Figure 4-source data 3.pdf]

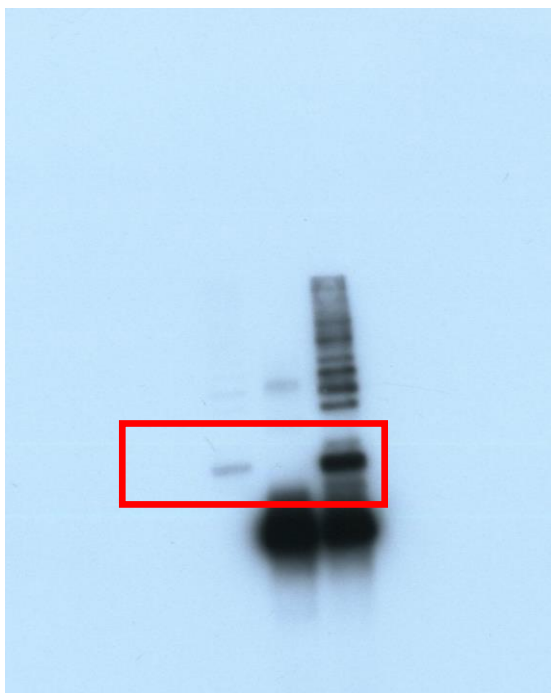

**Myc-CPC-1**

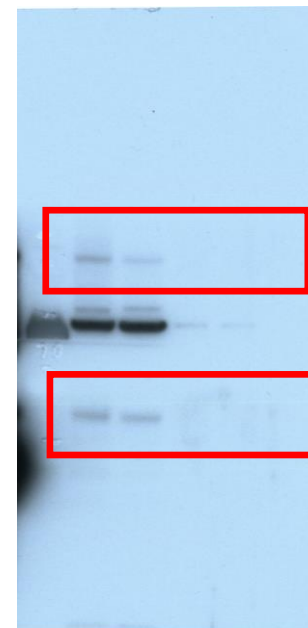

**WC-1**

**WC-2**

Supplement: fig4-figsupp1-data2 [file Figure 4-figure supplement 1-source data 3.pdf › Figure 4-figure supplement 1-source data 2/Figure 4-figure supplement 1-source data 3.pdf]

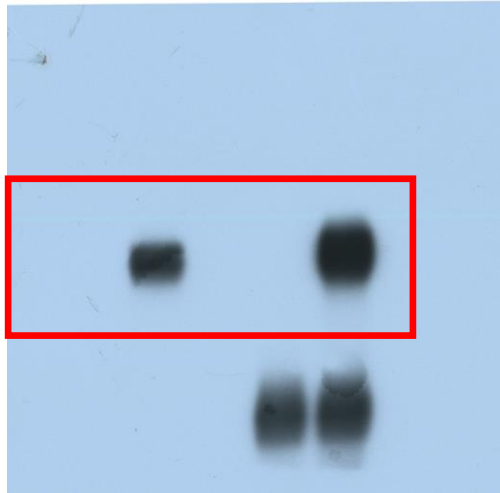

Myc-GCN-5

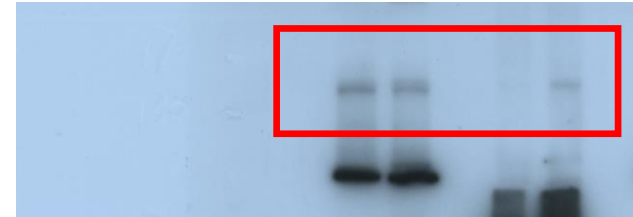

WC-1

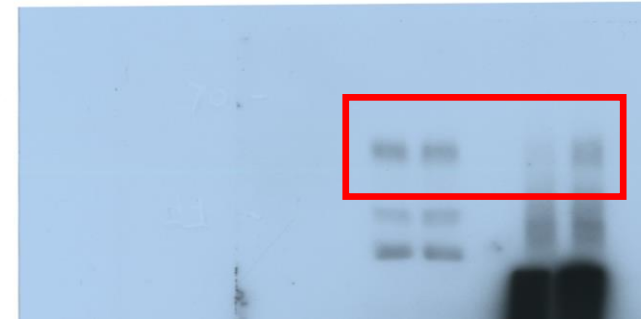

WC-2

Supplement: fig4-figsupp1-data3 [file Figure 4-figure supplement 1-source data 3.pdf › Figure 4-figure supplement 1-source data 3/Figure 4-figure supplement 1-source data 3.pdf]

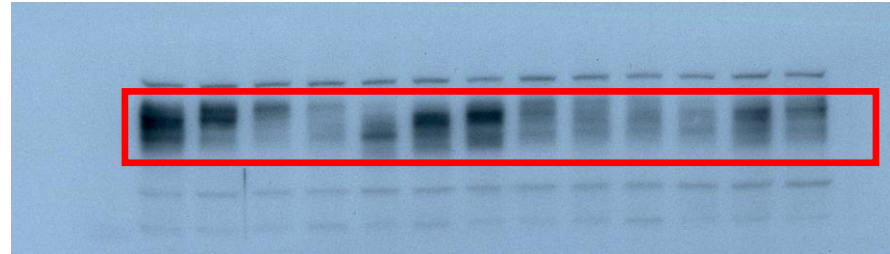

WT

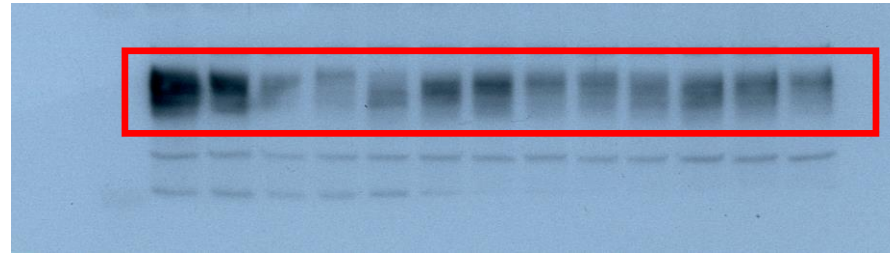

*gcn-5*<sup>ko</sup>

Supplement: fig5-data2 [file Figure 5-source data 2-1.pdf › Figure 5-source data 2/Figure 5-source data 2-1.pdf]

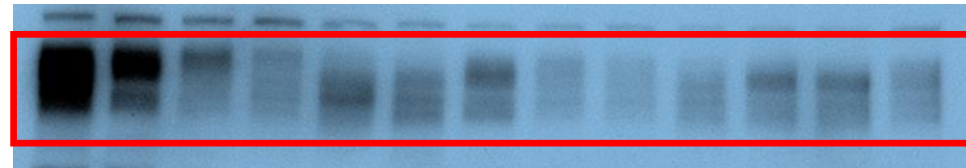

WT

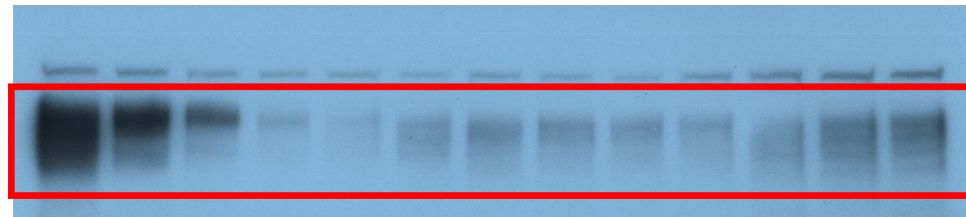

*ada-2*<sup>ko</sup>

Supplement: fig5-figsupp1-data3 [file Figure 5-figure supplement 1-source data 3-1.pdf › Figure 5-figure supplement 1-source data 3/Figure 5-figure supplement 1-source data 3-1.pdf]
